# Supplementary material for: A microglia clonal inflammatory disorder in Alzheimer’s Disease
Source: bioRxiv preprint, doi:10.1101/2024.01.25.577216, version 2 (2024-08-03)
Supplement: Supplemental Table 4 [file 577216_file05.xlsx]

## Sheet: PU1 Driver AD Reactome 
_MEMBER_MyList	_LogP_MyList	GO	_PATTERN_	_RANK_	GiniIndex	Category	CategoryID	Description	PARENT_GO	LogP	RAW pval	Enrichment	Z-score	#TotalGeneInLibrary	#GeneInGO	#GeneInHitList	#GeneInGOAndHitList	%InGO	STDV %InGO	GeneID	Hits	Log(q-value)	EvidenceCutoff	GROUP_ID	FirstInGroupByEnrichment	FirstInGroupByLogP	BestLogPInGroup	BestEnrichmentInGroup	URL
1	-3.14471	R-HSA-1295596	M1	1	0	Reactome Gene Sets	6	Spry regulation of FGF signaling		-3.14471	0.000716625	14.551	6.27213	713	7	21	3	14.2857	7.63604	673|867|5781	BRAF|CBL|PTPN11	0	0	4	1	1	-3.14471	14.551
1	-3.09248	R-HSA-5654741	M1	1	0	Reactome Gene Sets	6	Signaling by FGFR3		-3.09248	0.000808205	8.4881	5.27365	713	16	21	4	19.0476	8.56891	673|867|3845|5781	BRAF|CBL|KRAS|PTPN11	0	0	4	0	0	-3.14471	14.551
1	-2.98442	R-HSA-5654743	M1	1	0	Reactome Gene Sets	6	Signaling by FGFR4		-2.98442	0.00103653	7.9888	5.07714	713	17	21	4	19.0476	8.56891	673|867|3845|5781	BRAF|CBL|KRAS|PTPN11	0	0	4	0	0	-3.14471	14.551
1	-2.88372	R-HSA-5654736	M1	1	0	Reactome Gene Sets	6	Signaling by FGFR1		-2.88372	0.00130701	7.54497	4.89608	713	18	21	4	19.0476	8.56891	673|867|3845|5781	BRAF|CBL|KRAS|PTPN11	0	0	4	0	0	-3.14471	14.551
1	-2.88372	R-HSA-5654738	M1	1	0	Reactome Gene Sets	6	Signaling by FGFR2		-2.88372	0.00130701	7.54497	4.89608	713	18	21	4	19.0476	8.56891	673|867|3845|5781	BRAF|CBL|KRAS|PTPN11	0	0	4	0	0	-3.14471	14.551
1	-2.78116	R-HSA-5654732	M1	1	0	Reactome Gene Sets	6	Negative regulation of FGFR3 signaling		-2.78116	0.00165517	11.3175	5.42256	713	9	21	3	14.2857	7.63604	673|867|5781	BRAF|CBL|PTPN11	0	0	4	0	0	-3.14471	14.551
1	-2.63458	R-HSA-210993	M1	1	0	Reactome Gene Sets	6	Tie2 Signaling		-2.63458	0.00231962	10.1857	5.09251	713	10	21	3	14.2857	7.63604	3845|5781|7010	KRAS|PTPN11|TEK	0	0	4	0	0	-3.14471	14.551
1	-2.63458	R-HSA-5654726	M1	1	0	Reactome Gene Sets	6	Negative regulation of FGFR1 signaling		-2.63458	0.00231962	10.1857	5.09251	713	10	21	3	14.2857	7.63604	673|867|5781	BRAF|CBL|PTPN11	0	0	4	0	0	-3.14471	14.551
1	-2.63458	R-HSA-5654727	M1	1	0	Reactome Gene Sets	6	Negative regulation of FGFR2 signaling		-2.63458	0.00231962	10.1857	5.09251	713	10	21	3	14.2857	7.63604	673|867|5781	BRAF|CBL|PTPN11	0	0	4	0	0	-3.14471	14.551
1	-2.63458	R-HSA-5654733	M1	1	0	Reactome Gene Sets	6	Negative regulation of FGFR4 signaling		-2.63458	0.00231962	10.1857	5.09251	713	10	21	3	14.2857	7.63604	673|867|5781	BRAF|CBL|PTPN11	0	0	4	0	0	-3.14471	14.551
1	-2.46452	R-HSA-190236	M1	1	0	Reactome Gene Sets	6	Signaling by FGFR		-2.46452	0.00343145	5.90476	4.1625	713	23	21	4	19.0476	8.56891	673|867|3845|5781	BRAF|CBL|KRAS|PTPN11	0	0	4	0	0	-3.14471	14.551
1	-2.28237	R-HSA-177929	M1	1	0	Reactome Gene Sets	6	Signaling by EGFR		-2.28237	0.00521955	7.83516	4.3298	713	13	21	3	14.2857	7.63604	867|3845|5781	CBL|KRAS|PTPN11	0	0	4	0	0	-3.14471	14.551
1	-2.28237	R-HSA-187687	M1	1	0	Reactome Gene Sets	6	Signalling to ERKs		-2.28237	0.00521955	7.83516	4.3298	713	13	21	3	14.2857	7.63604	673|3845|6016	BRAF|KRAS|RIT1	0	0	4	0	0	-3.14471	14.551
1	-2.09736	R-HSA-9682385	M1	1	0	Reactome Gene Sets	6	FLT3 signaling in disease		-2.09736	0.00799177	6.79048	3.94574	713	15	21	3	14.2857	7.63604	867|3845|5781	CBL|KRAS|PTPN11	0	0	4	0	0	-3.14471	14.551
1	-2.01549	R-HSA-6806834	M1	1	0	Reactome Gene Sets	6	Signaling by MET		-2.01549	0.00964951	6.36607	3.77917	713	16	21	3	14.2857	7.63604	867|3845|5781	CBL|KRAS|PTPN11	0	0	4	0	0	-3.14471	14.551
1	-1.81586	R-HSA-5684996	M1	1	0	Reactome Gene Sets	6	MAPK1/MAPK3 signaling		-1.81586	0.0152808	3.20305	2.90194	713	53	21	5	23.8095	9.29429	673|3845|4763|5781|7010	BRAF|KRAS|NF1|PTPN11|TEK	0	0	3	0	0	-3.67211	20.3714
1	-1.74001	R-HSA-6802957	M1	1	0	Reactome Gene Sets	6	Oncogenic MAPK signaling		-1.74001	0.0181967	5.09286	3.232	713	20	21	3	14.2857	7.63604	673|3845|4763	BRAF|KRAS|NF1	0	0	3	0	0	-3.67211	20.3714
1	-1.74001	R-HSA-9607240	M1	1	0	Reactome Gene Sets	6	FLT3 Signaling		-1.74001	0.0181967	5.09286	3.232	713	20	21	3	14.2857	7.63604	867|3845|5781	CBL|KRAS|PTPN11	0	0	4	0	0	-3.14471	14.551
1	-1.71048	R-HSA-166520	M1	1	0	Reactome Gene Sets	6	Signaling by NTRKs		-1.71048	0.0194769	3.67053	2.90416	713	37	21	4	19.0476	8.56891	673|3845|5781|6016	BRAF|KRAS|PTPN11|RIT1	0	0	4	0	0	-3.14471	14.551
1	-1.48507	R-HSA-5683057	M1	1	0	Reactome Gene Sets	6	MAPK family signaling cascades		-1.48507	0.032729	2.65253	2.4122	713	64	21	5	23.8095	9.29429	673|3845|4763|5781|7010	BRAF|KRAS|NF1|PTPN11|TEK	0	0	3	0	0	-3.67211	20.3714
1	-1.47666	R-HSA-1433557	M1	1	0	Reactome Gene Sets	6	Signaling by SCF-KIT		-1.47666	0.033369	4.07429	2.72406	713	25	21	3	14.2857	7.63604	867|3845|5781	CBL|KRAS|PTPN11	0	0	4	0	0	-3.14471	14.551
1	-2.18595	R-HSA-446652	M1	1	0	Reactome Gene Sets	6	Interleukin-1 family signaling		-2.18595	0.00651702	7.27551	4.1283	713	14	21	3	14.2857	7.63604	4088|5781|7157	SMAD3|PTPN11|TP53	0	0	11	0	0	-2.38799	8.4881
1	-1.80229	R-HSA-202733	M1	1	0	Reactome Gene Sets	6	Cell surface interactions at the vascular wall		-1.80229	0.0157657	5.3609	3.35405	713	19	21	3	14.2857	7.63604	3845|5781|7010	KRAS|PTPN11|TEK	0	0	4	0	0	-3.14471	14.551
1	-1.74001	R-HSA-6804756	M1	1	0	Reactome Gene Sets	6	Regulation of TP53 Activity through Phosphorylation		-1.74001	0.0181967	5.09286	3.232	713	20	21	3	14.2857	7.63604	545|7157|11200	ATR|TP53|CHEK2	0	0	1	0	0	-4.39925	20.3714
1	-1.62599	R-HSA-69473	M1	1	0	Reactome Gene Sets	6	G2/M DNA damage checkpoint		-1.62599	0.0236597	4.62987	3.01065	713	22	21	3	14.2857	7.63604	545|7157|11200	ATR|TP53|CHEK2	0	0	1	0	0	-4.39925	20.3714
1	-1.62599	R-HSA-69481	M1	1	0	Reactome Gene Sets	6	G2/M Checkpoints		-1.62599	0.0236597	4.62987	3.01065	713	22	21	3	14.2857	7.63604	545|7157|11200	ATR|TP53|CHEK2	0	0	1	0	0	-4.39925	20.3714
1	-1.57359	R-HSA-8878159	M1	1	0	Reactome Gene Sets	6	Transcriptional regulation by RUNX3		-1.57359	0.026694	4.42857	2.90971	713	23	21	3	14.2857	7.63604	3845|4088|7157	KRAS|SMAD3|TP53	0	0	3	0	0	-3.67211	20.3714

## Sheet: PU1 Driver AD KEGG Pathway
_MEMBER_MyList	_LogP_MyList	GO	_PATTERN_	_RANK_	GiniIndex	Category	CategoryID	Description	PARENT_GO	LogP	RAW pval	Enrichment	Z-score	#TotalGeneInLibrary	#GeneInGO	#GeneInHitList	#GeneInGOAndHitList	%InGO	STDV %InGO	GeneID	Hits	Log(q-value)	EvidenceCutoff	GROUP_ID	FirstInGroupByEnrichment	FirstInGroupByLogP	BestLogPInGroup	BestEnrichmentInGroup	URL
1	-2.87001	hsa05220	M1	1	0	KEGG Pathway	24	Chronic myeloid leukemia		-2.87001	0.00134893	4.42857	4.18529	713	46	21	6	28.5714	9.85808	673|867|3845|4088|5781|7157	BRAF|CBL|KRAS|SMAD3|PTPN11|TP53	0	0	3	0	0	-3.67211	20.3714
1	-2.72944	hsa04110	M1	1	0	KEGG Pathway	24	Cell cycle		-2.72944	0.00186447	5.1443	4.24376	713	33	21	5	23.8095	9.29429	545|4088|7157|8243|11200	ATR|SMAD3|TP53|SMC1A|CHEK2	0	0	1	0	0	-4.39925	20.3714
1	-1.80229	hsa05216	M1	1	0	KEGG Pathway	24	Thyroid cancer		-1.80229	0.0157657	5.3609	3.35405	713	19	21	3	14.2857	7.63604	673|3845|7157	BRAF|KRAS|TP53	0	0	3	0	0	-3.67211	20.3714
1	-1.78215	hsa04218	M1	1	0	KEGG Pathway	24	Cellular senescence		-1.78215	0.016514	3.14374	2.85248	713	54	21	5	23.8095	9.29429	545|3845|4088|7157|11200	ATR|KRAS|SMAD3|TP53|CHEK2	0	0	1	0	0	-4.39925	20.3714
1	-1.53926	hsa05225	M1	1	0	KEGG Pathway	24	Hepatocellular carcinoma		-1.53926	0.0288896	2.7381	2.49331	713	62	21	5	23.8095	9.29429	673|3845|4088|7157|55193	BRAF|KRAS|SMAD3|TP53|PBRM1	0	0	3	0	0	-3.67211	20.3714
1	-1.5238	hsa04722	M1	1	0	KEGG Pathway	24	Neurotrophin signaling pathway		-1.5238	0.0299363	3.23356	2.59751	713	42	21	4	19.0476	8.56891	673|3845|5781|7157	BRAF|KRAS|PTPN11|TP53	0	0	3	0	0	-3.67211	20.3714
1	-1.5238	hsa05212	M1	1	0	KEGG Pathway	24	Pancreatic cancer		-1.5238	0.0299363	3.23356	2.59751	713	42	21	4	19.0476	8.56891	673|3845|4088|7157	BRAF|KRAS|SMAD3|TP53	0	0	3	0	0	-3.67211	20.3714
1	-1.51187	hsa05205	M1	1	0	KEGG Pathway	24	Proteoglycans in cancer		-1.51187	0.0307702	2.69463	2.45237	713	63	21	5	23.8095	9.29429	673|867|3845|5781|7157	BRAF|CBL|KRAS|PTPN11|TP53	0	0	3	0	0	-3.67211	20.3714
1	-1.47666	hsa05219	M1	1	0	KEGG Pathway	24	Bladder cancer		-1.47666	0.033369	4.07429	2.72406	713	25	21	3	14.2857	7.63604	673|3845|7157	BRAF|KRAS|TP53	0	0	3	0	0	-3.67211	20.3714
1	-1.45884	hsa05166	M1	1	0	KEGG Pathway	24	Human T-cell leukemia virus 1 infection		-1.45884	0.0347667	2.61172	2.37277	713	65	21	5	23.8095	9.29429	545|3845|4088|7157|11200	ATR|KRAS|SMAD3|TP53|CHEK2	0	0	1	0	0	-4.39925	20.3714
1	-1.30873	hsa04115	M1	1	0	KEGG Pathway	24	p53 signaling pathway		-1.30873	0.049121	3.51232	2.40459	713	29	21	3	14.2857	7.63604	545|7157|11200	ATR|TP53|CHEK2	0	0	1	0	0	-4.39925	20.3714

## Sheet: PU1 DriveGO Molecular Functions
_MEMBER_MyList	_LogP_MyList	GO	_PATTERN_	_RANK_	GiniIndex	Category	CategoryID	Description	PARENT_GO	LogP	RAW pval	Enrichment	Z-score	#TotalGeneInLibrary	#GeneInGO	#GeneInHitList	#GeneInGOAndHitList	%InGO	STDV %InGO	GeneID	Hits	Log(q-value)	EvidenceCutoff	GROUP_ID	FirstInGroupByEnrichment	FirstInGroupByLogP	BestLogPInGroup	BestEnrichmentInGroup	URL
1	-2.38799	GO:0030971	M1	1	0	GO Molecular Functions	21	receptor tyrosine kinase binding		-2.38799	0.00409271	8.4881	4.55407	713	12	21	3	14.2857	7.63604	867|5781|7157	CBL|PTPN11|TP53	0	0	11	1	1	-2.38799	8.4881
1	-1.80229	GO:1990782	M1	1	0	GO Molecular Functions	21	protein tyrosine kinase binding		-1.80229	0.0157657	5.3609	3.35405	713	19	21	3	14.2857	7.63604	867|5781|7157	CBL|PTPN11|TP53	0	0	11	0	0	-2.38799	8.4881
1	-1.72558	GO:0003682	M1	1	0	GO Molecular Functions	21	chromatin binding		-1.72558	0.0188113	2.37667	2.58461	713	100	21	7	33.3333	10.2869	1788|4088|7157|8243|9968|55193|171023	DNMT3A|SMAD3|TP53|SMC1A|MED12|PBRM1|ASXL1	0	0	5	0	0	-2.94892	12.7321
1	-1.34788	GO:0008276	M1	1	0	GO Molecular Functions	21	protein methyltransferase activity		-1.34788	0.0448866	3.63776	2.47893	713	28	21	3	14.2857	7.63604	1788|29072|58508	DNMT3A|SETD2|KMT2C	0	0	2	0	0	-4.21503	7.54497
1	-1.34788	GO:0008757	M1	1	0	GO Molecular Functions	21	S-adenosylmethionine-dependent methyltransferase activity		-1.34788	0.0448866	3.63776	2.47893	713	28	21	3	14.2857	7.63604	1788|29072|58508	DNMT3A|SETD2|KMT2C	0	0	2	0	0	-4.21503	7.54497

## Sheet: PU1 Driver Canonical Pathways
_MEMBER_MyList	_LogP_MyList	GO	_PATTERN_	_RANK_	GiniIndex	Category	CategoryID	Description	PARENT_GO	LogP	RAW pval	Enrichment	Z-score	#TotalGeneInLibrary	#GeneInGO	#GeneInHitList	#GeneInGOAndHitList	%InGO	STDV %InGO	GeneID	Hits	Log(q-value)	EvidenceCutoff	GROUP_ID	FirstInGroupByEnrichment	FirstInGroupByLogP	BestLogPInGroup	BestEnrichmentInGroup	URL
1	-2.38799	M270	M1	1	0	Canonical Pathways	11	PID MAPK TRK PATHWAY		-2.38799	0.00409271	8.4881	4.55407	713	12	21	3	14.2857	7.63604	673|3845|6016	BRAF|KRAS|RIT1	0	0	4	0	0	-3.14471	14.551
1	-1.80229	M261	M1	1	0	Canonical Pathways	11	PID P53 REGULATION PATHWAY		-1.80229	0.0157657	5.3609	3.35405	713	19	21	3	14.2857	7.63604	545|7157|11200	ATR|TP53|CHEK2	0	0	1	0	0	-4.39925	20.3714
1	-1.80229	M34	M1	1	0	Canonical Pathways	11	PID TCR PATHWAY		-1.80229	0.0157657	5.3609	3.35405	713	19	21	3	14.2857	7.63604	867|3845|5781	CBL|KRAS|PTPN11	0	0	4	0	0	-3.14471	14.551
1	-1.57359	M237	M1	1	0	Canonical Pathways	11	PID VEGFR1 2 PATHWAY		-1.57359	0.026694	4.42857	2.90971	713	23	21	3	14.2857	7.63604	673|867|5781	BRAF|CBL|PTPN11	0	0	4	0	0	-3.14471	14.551
1	-1.48989	M186	M1	1	0	Canonical Pathways	11	PID PDGFRB PATHWAY		-1.48989	0.0323678	3.15836	2.54166	713	43	21	4	19.0476	8.56891	673|867|3845|5781	BRAF|CBL|KRAS|PTPN11	0	0	4	0	0	-3.14471	14.551
1	-1.4317	M100	M1	1	0	Canonical Pathways	11	PID SHP2 PATHWAY		-1.4317	0.0370087	3.91758	2.63832	713	26	21	3	14.2857	7.63604	3845|5781|7010	KRAS|PTPN11|TEK	0	0	4	0	0	-3.14471	14.551
1	-1.4317	M187	M1	1	0	Canonical Pathways	11	PID TRKR PATHWAY		-1.4317	0.0370087	3.91758	2.63832	713	26	21	3	14.2857	7.63604	3845|5781|6016	KRAS|PTPN11|RIT1	0	0	4	0	0	-3.14471	14.551

## Sheet: all SNV PU1 AD
_MEMBER_MyList	_LogP_MyList	GO	_PATTERN_	_RANK_	GiniIndex	Category	CategoryID	Description	PARENT_GO	LogP	Enrichment	Z-score	#TotalGeneInLibrary	#GeneInGO	#GeneInHitList	#GeneInGOAndHitList	%InGO	STDV %InGO	GeneID	Hits
1	-3.12948	R-HSA-9013695	M1	1	0	Reactome Gene Sets	6	NOTCH4 Intracellular Domain Regulates Transcription		-3.12948	5.20408	4.45531	714	7	98	5	5.10204	2.22273	1387|2324|4088|4851|4855	CREBBP|FLT4|SMAD3|NOTCH1|NOTCH4
1	-3.12948	R-HSA-1295596	M1	1	0	Reactome Gene Sets	6	Spry regulation of FGF signaling		-3.12948	5.20408	4.45531	714	7	98	5	5.10204	2.22273	673|867|5518|5781|6714	BRAF|CBL|PPP2R1A|PTPN11|SRC
1	-2.82869	GO:0034330	M1	1	0	GO Biological Processes	19	cell junction organization	19_GO:0009987 cellular process	-2.82869	2.18571	3.46536	714	50	98	15	15.3061	3.63702	324|613|1524|1639|2047|2064|2066|4088|4744|5584|5621|5802|6714|8934|201163	APC|BCR|CX3CR1|DCTN1|EPHB1|ERBB2|ERBB4|SMAD3|NEFH|PRKCI|PRNP|PTPRS|SRC|RAB29|FLCN
1	-2.7249	GO:0007173	M1	1	0	GO Biological Processes	19	epidermal growth factor receptor signaling pathway	19_GO:0023052 signaling	-2.7249	3.4	3.74443	714	15	98	7	7.14286	2.60154	673|867|2064|2066|5290|5781|6714	BRAF|CBL|ERBB2|ERBB4|PIK3CA|PTPN11|SRC
1	-2.599	GO:1903306	M1	1	0	GO Biological Processes	19	negative regulation of regulated secretory pathway	19_GO:0051179 localization	-2.599	7.28571	4.34858	714	3	98	3	3.06122	1.74014	613|673|4851	BCR|BRAF|NOTCH1
1	-2.599	R-HSA-9620244	M1	1	0	Reactome Gene Sets	6	Long-term potentiation		-2.599	7.28571	4.34858	714	3	98	3	3.06122	1.74014	2066|2903|6714	ERBB4|GRIN2A|SRC
1	-2.52648	M62	M1	1	0	Canonical Pathways	11	PID EPHB FWD PATHWAY		-2.52648	3.1875	3.52734	714	16	98	7	7.14286	2.60154	2047|3845|5058|5290|5921|6714|8867	EPHB1|KRAS|PAK1|PIK3CA|RASA1|SRC|SYNJ1
1	-2.52648	R-HSA-5654741	M1	1	0	Reactome Gene Sets	6	Signaling by FGFR3		-2.52648	3.1875	3.52734	714	16	98	7	7.14286	2.60154	673|867|3845|5290|5518|5781|6714	BRAF|CBL|KRAS|PIK3CA|PPP2R1A|PTPN11|SRC
1	-2.45123	GO:0032210	M1	1	0	GO Biological Processes	19	regulation of telomere maintenance via telomerase	19_GO:0008152 metabolic process	-2.45123	4.04762	3.66737	714	9	98	5	5.10204	2.22273	472|545|6714|9212|25913	ATM|ATR|SRC|AURKB|POT1
1	-2.45123	R-HSA-5654732	M1	1	0	Reactome Gene Sets	6	Negative regulation of FGFR3 signaling		-2.45123	4.04762	3.66737	714	9	98	5	5.10204	2.22273	673|867|5518|5781|6714	BRAF|CBL|PPP2R1A|PTPN11|SRC
1	-2.37401	GO:0007420	M1	1	0	GO Biological Processes	19	brain development	19_GO:0032502 developmental process	-2.37401	1.73864	2.94953	714	88	98	21	21.4286	4.14492	472|613|1524|2047|2066|2735|2903|3845|4763|4851|4854|5781|5802|5914|6714|7157|8660|8867|9289|9739|29072	ATM|BCR|CX3CR1|EPHB1|ERBB4|GLI1|GRIN2A|KRAS|NF1|NOTCH1|NOTCH3|PTPN11|PTPRS|RARA|SRC|TP53|IRS2|SYNJ1|ADGRG1|SETD1A|SETD2
1	-2.34742	GO:0038127	M1	1	0	GO Biological Processes	19	ERBB signaling pathway	19_GO:0023052 signaling	-2.34742	3	3.32664	714	17	98	7	7.14286	2.60154	673|867|2064|2066|5290|5781|6714	BRAF|CBL|ERBB2|ERBB4|PIK3CA|PTPN11|SRC
1	-2.34742	GO:0016324	M1	1	0	GO Cellular Components	20	apical plasma membrane		-2.34742	3	3.32664	714	17	98	7	7.14286	2.60154	2064|2195|2778|4851|5584|7010|8972	ERBB2|FAT1|GNAS|NOTCH1|PRKCI|TEK|MGAM
1	-2.34742	R-HSA-5654743	M1	1	0	Reactome Gene Sets	6	Signaling by FGFR4		-2.34742	3	3.32664	714	17	98	7	7.14286	2.60154	673|867|3845|5290|5518|5781|6714	BRAF|CBL|KRAS|PIK3CA|PPP2R1A|PTPN11|SRC
1	-2.31415	GO:0040007	M1	1	0	GO Biological Processes	19	growth	19_GO:0040007 growth	-2.31415	1.91101	2.9655	714	61	98	16	16.3265	3.7336	367|472|2066|2099|2475|2625|2778|4088|4851|5781|5914|6714|6794|7157|8085|9968	AR|ATM|ERBB4|ESR1|MTOR|GATA3|GNAS|SMAD3|NOTCH1|PTPN11|RARA|SRC|STK11|TP53|KMT2D|MED12
1	-2.31415	GO:0048589	M1	1	0	GO Biological Processes	19	developmental growth	19_GO:0040007 growth	-2.31415	1.91101	2.9655	714	61	98	16	16.3265	3.7336	367|472|2066|2099|2475|2625|2778|4088|4851|5781|5914|6714|6794|7157|8085|9968	AR|ATM|ERBB4|ESR1|MTOR|GATA3|GNAS|SMAD3|NOTCH1|PTPN11|RARA|SRC|STK11|TP53|KMT2D|MED12
1	-2.20575	GO:0051960	M1	1	0	GO Biological Processes	19	regulation of nervous system development	19_GO:0032502 developmental process	-2.20575	1.91729	2.8776	714	57	98	15	15.3061	3.63702	673|1524|2047|2475|3845|4763|4851|5584|5802|5914|6653|6794|7157|8867|23013	BRAF|CX3CR1|EPHB1|MTOR|KRAS|NF1|NOTCH1|PRKCI|PTPRS|RARA|SORL1|STK11|TP53|SYNJ1|SPEN
1	-2.19994	GO:0060251	M1	1	0	GO Biological Processes	19	regulation of glial cell proliferation	19_GO:0032502 developmental process	-2.19994	3.64286	3.35471	714	10	98	5	5.10204	2.22273	3845|4763|4851|5584|7157	KRAS|NF1|NOTCH1|PRKCI|TP53
1	-2.19994	R-HSA-5654726	M1	1	0	Reactome Gene Sets	6	Negative regulation of FGFR1 signaling		-2.19994	3.64286	3.35471	714	10	98	5	5.10204	2.22273	673|867|5518|5781|6714	BRAF|CBL|PPP2R1A|PTPN11|SRC
1	-2.19994	R-HSA-5654727	M1	1	0	Reactome Gene Sets	6	Negative regulation of FGFR2 signaling		-2.19994	3.64286	3.35471	714	10	98	5	5.10204	2.22273	673|867|5518|5781|6714	BRAF|CBL|PPP2R1A|PTPN11|SRC
1	-2.19994	R-HSA-5654733	M1	1	0	Reactome Gene Sets	6	Negative regulation of FGFR4 signaling		-2.19994	3.64286	3.35471	714	10	98	5	5.10204	2.22273	673|867|5518|5781|6714	BRAF|CBL|PPP2R1A|PTPN11|SRC
1	-2.18486	R-HSA-5654736	M1	1	0	Reactome Gene Sets	6	Signaling by FGFR1		-2.18486	2.83333	3.14008	714	18	98	7	7.14286	2.60154	673|867|3845|5290|5518|5781|6714	BRAF|CBL|KRAS|PIK3CA|PPP2R1A|PTPN11|SRC
1	-2.18486	R-HSA-5654738	M1	1	0	Reactome Gene Sets	6	Signaling by FGFR2		-2.18486	2.83333	3.14008	714	18	98	7	7.14286	2.60154	673|867|3845|5290|5518|5781|6714	BRAF|CBL|KRAS|PIK3CA|PPP2R1A|PTPN11|SRC
1	-2.16379	GO:0030071	M1	1	0	GO Biological Processes	19	regulation of mitotic metaphase/anaphase transition	19_GO:0050789 regulation of biological process	-2.16379	3.12245	3.19683	714	14	98	6	6.12245	2.42176	324|472|6597|9212|55193|57492	APC|ATM|SMARCA4|AURKB|PBRM1|ARID1B
1	-2.16379	GO:0033045	M1	1	0	GO Biological Processes	19	regulation of sister chromatid segregation	19_GO:0050789 regulation of biological process	-2.16379	3.12245	3.19683	714	14	98	6	6.12245	2.42176	324|472|6597|9212|55193|57492	APC|ATM|SMARCA4|AURKB|PBRM1|ARID1B
1	-2.16379	GO:0051983	M1	1	0	GO Biological Processes	19	regulation of chromosome segregation	19_GO:0050789 regulation of biological process	-2.16379	3.12245	3.19683	714	14	98	6	6.12245	2.42176	324|472|6597|9212|55193|57492	APC|ATM|SMARCA4|AURKB|PBRM1|ARID1B
1	-2.16379	GO:1902099	M1	1	0	GO Biological Processes	19	regulation of metaphase/anaphase transition of cell cycle	19_GO:0050789 regulation of biological process	-2.16379	3.12245	3.19683	714	14	98	6	6.12245	2.42176	324|472|6597|9212|55193|57492	APC|ATM|SMARCA4|AURKB|PBRM1|ARID1B
1	-2.14679	GO:0051962	M1	1	0	GO Biological Processes	19	positive regulation of nervous system development	19_GO:0032502 developmental process	-2.14679	2.27679	2.94556	714	32	98	10	10.2041	3.05775	673|1524|2047|2475|3845|4851|5584|6794|8867|23013	BRAF|CX3CR1|EPHB1|MTOR|KRAS|NOTCH1|PRKCI|STK11|SYNJ1|SPEN
1	-2.09993	GO:0097060	M1	1	0	GO Cellular Components	20	synaptic membrane		-2.09993	2.53416	2.98101	714	23	98	8	8.16327	2.76584	2064|2066|2903|5802|6714|8301|8867|9829	ERBB2|ERBB4|GRIN2A|PTPRS|SRC|PICALM|SYNJ1|DNAJC6
1	-2.07435	GO:0045622	M1	1	0	GO Biological Processes	19	regulation of T-helper cell differentiation	19_GO:0002376 immune system process	-2.07435	4.16327	3.3523	714	7	98	4	4.08163	1.99873	2625|3123|3718|5914	GATA3|HLA-DRB1|JAK3|RARA
1	-2.07435	GO:0006356	M1	1	0	GO Biological Processes	19	regulation of transcription by RNA polymerase I	19_GO:0008152 metabolic process	-2.07435	4.16327	3.3523	714	7	98	4	4.08163	1.99873	1387|2064|2475|6597	CREBBP|ERBB2|MTOR|SMARCA4
1	-2.07435	M5919	M1	1	0	Hallmark Gene Sets	23	HALLMARK HEDGEHOG SIGNALING		-2.07435	4.16327	3.3523	714	7	98	4	4.08163	1.99873	2735|4763|5921|9289	GLI1|NF1|RASA1|ADGRG1
1	-2.07286	hsa01522	M1	1	0	KEGG Pathway	24	Endocrine resistance		-2.07286	1.97321	2.78266	714	48	98	13	13.2653	3.42643	673|1871|2064|2099|2475|2778|3845|4851|4854|4855|5290|6714|7157	BRAF|E2F3|ERBB2|ESR1|MTOR|GNAS|KRAS|NOTCH1|NOTCH3|NOTCH4|PIK3CA|SRC|TP53
1	-2.0428	GO:0051974	M1	1	0	GO Biological Processes	19	negative regulation of telomerase activity	19_GO:0048519 negative regulation of biological process	-2.0428	5.46429	3.56878	714	4	98	3	3.06122	1.74014	6714|7157|25913	SRC|TP53|POT1
1	-2.0428	GO:0035418	M1	1	0	GO Biological Processes	19	protein localization to synapse	19_GO:0051179 localization	-2.0428	5.46429	3.56878	714	4	98	3	3.06122	1.74014	2064|2066|2903	ERBB2|ERBB4|GRIN2A
1	-2.0428	GO:0062237	M1	1	0	GO Biological Processes	19	protein localization to postsynapse	19_GO:0051179 localization	-2.0428	5.46429	3.56878	714	4	98	3	3.06122	1.74014	2064|2066|2903	ERBB2|ERBB4|GRIN2A
1	-2.0428	GO:0099072	M1	1	0	GO Biological Processes	19	regulation of postsynaptic membrane neurotransmitter receptor levels	19_GO:0065007 biological regulation	-2.0428	5.46429	3.56878	714	4	98	3	3.06122	1.74014	2064|2066|5584	ERBB2|ERBB4|PRKCI
1	-2.0428	GO:1903539	M1	1	0	GO Biological Processes	19	protein localization to postsynaptic membrane	19_GO:0051179 localization	-2.0428	5.46429	3.56878	714	4	98	3	3.06122	1.74014	2064|2066|2903	ERBB2|ERBB4|GRIN2A
1	-2.0428	GO:0071391	M1	1	0	GO Biological Processes	19	cellular response to estrogen stimulus	19_GO:0050896 response to stimulus	-2.0428	5.46429	3.56878	714	4	98	3	3.06122	1.74014	367|2099|5914	AR|ESR1|RARA
1	-2.0428	GO:2000345	M1	1	0	GO Biological Processes	19	regulation of hepatocyte proliferation	19_GO:0032502 developmental process	-2.0428	5.46429	3.56878	714	4	98	3	3.06122	1.74014	2735|7128|7494	GLI1|TNFAIP3|XBP1
1	-2.0428	R-HSA-1912399	M1	1	0	Reactome Gene Sets	6	Pre-NOTCH Processing in the Endoplasmic Reticulum		-2.0428	5.46429	3.56878	714	4	98	3	3.06122	1.74014	4851|4854|4855	NOTCH1|NOTCH3|NOTCH4
1	-2.0428	R-HSA-3781865	M1	1	0	Reactome Gene Sets	6	Diseases of glycosylation		-2.0428	5.46429	3.56878	714	4	98	3	3.06122	1.74014	4851|4854|4855	NOTCH1|NOTCH3|NOTCH4
1	-2.0428	R-HSA-3906995	M1	1	0	Reactome Gene Sets	6	Diseases associated with O-glycosylation of proteins		-2.0428	5.46429	3.56878	714	4	98	3	3.06122	1.74014	4851|4854|4855	NOTCH1|NOTCH3|NOTCH4
1	-2.0428	R-HSA-5083630	M1	1	0	Reactome Gene Sets	6	Defective LFNG causes SCDO3		-2.0428	5.46429	3.56878	714	4	98	3	3.06122	1.74014	4851|4854|4855	NOTCH1|NOTCH3|NOTCH4
1	-2.0428	R-HSA-418346	M1	1	0	Reactome Gene Sets	6	Platelet homeostasis		-2.0428	5.46429	3.56878	714	4	98	3	3.06122	1.74014	2778|5518|5781	GNAS|PPP2R1A|PTPN11
1	-2.03653	GO:0005975	M1	1	0	GO Biological Processes	19	carbohydrate metabolic process	19_GO:0008152 metabolic process	-2.03653	2.68421	2.96584	714	19	98	7	7.14286	2.60154	673|3418|5290|7157|8660|8867|8972	BRAF|IDH2|PIK3CA|TP53|IRS2|SYNJ1|MGAM
1	-1.99249	GO:0030850	M1	1	0	GO Biological Processes	19	prostate gland development	19_GO:0022414 reproductive process	-1.99249	2.91429	2.98663	714	15	98	6	6.12245	2.42176	367|2099|2735|4851|5914|6794	AR|ESR1|GLI1|NOTCH1|RARA|STK11
1	-1.99249	GO:0034103	M1	1	0	GO Biological Processes	19	regulation of tissue remodeling	19_GO:0032501 multicellular organismal process	-1.99249	2.91429	2.98663	714	15	98	6	6.12245	2.42176	613|2324|4763|6714|7128|7157	BCR|FLT4|NF1|SRC|TNFAIP3|TP53
1	-1.9863	GO:0014015	M1	1	0	GO Biological Processes	19	positive regulation of gliogenesis	19_GO:0032502 developmental process	-1.9863	3.31169	3.07975	714	11	98	5	5.10204	2.22273	2475|3845|4851|5584|8867	MTOR|KRAS|NOTCH1|PRKCI|SYNJ1
1	-1.96782	GO:0007162	M1	1	0	GO Biological Processes	19	negative regulation of cell adhesion	19_GO:0048519 negative regulation of biological process	-1.96782	1.98701	2.69389	714	44	98	12	12.2449	3.31132	1840|2064|3123|3718|4763|4851|4855|5621|5781|5921|6714|10019	DTX1|ERBB2|HLA-DRB1|JAK3|NF1|NOTCH1|NOTCH4|PRNP|PTPN11|RASA1|SRC|SH2B3
1	-1.95088	GO:0033044	M1	1	0	GO Biological Processes	19	regulation of chromosome organization	19_GO:0050789 regulation of biological process	-1.95088	2.05495	2.70071	714	39	98	11	11.2245	3.18872	324|472|545|6597|6714|9212|10111|23049|25913|55193|57492	APC|ATM|ATR|SMARCA4|SRC|AURKB|RAD50|SMG1|POT1|PBRM1|ARID1B
1	-1.94909	GO:0000075	M1	1	0	GO Biological Processes	19	cell cycle checkpoint signaling	19_GO:0023052 signaling	-1.94909	2.26108	2.76354	714	29	98	9	9.18367	2.91727	324|472|545|5781|7157|9212|9656|10111|11200	APC|ATM|ATR|PTPN11|TP53|AURKB|MDC1|RAD50|CHEK2
1	-1.91349	GO:0050767	M1	1	0	GO Biological Processes	19	regulation of neurogenesis	19_GO:0032502 developmental process	-1.91349	1.89429	2.61363	714	50	98	13	13.2653	3.42643	673|1524|2475|3845|4763|4851|5584|5802|6653|6794|7157|8867|23013	BRAF|CX3CR1|MTOR|KRAS|NF1|NOTCH1|PRKCI|PTPRS|SORL1|STK11|TP53|SYNJ1|SPEN
1	-1.9006	GO:1901796	M1	1	0	GO Biological Processes	19	regulation of signal transduction by p53 class mediator	19_GO:0023052 signaling	-1.9006	2.55	2.80243	714	20	98	7	7.14286	2.60154	472|545|2475|6794|7157|9212|11200	ATM|ATR|MTOR|STK11|TP53|AURKB|CHEK2
1	-1.9006	R-HSA-6804756	M1	1	0	Reactome Gene Sets	6	Regulation of TP53 Activity through Phosphorylation		-1.9006	2.55	2.80243	714	20	98	7	7.14286	2.60154	472|545|6794|7157|9212|10111|11200	ATM|ATR|STK11|TP53|AURKB|RAD50|CHEK2
1	-1.89852	GO:0035239	M1	1	0	GO Biological Processes	19	tube morphogenesis	19_GO:0032502 developmental process	-1.89852	1.57143	2.48458	714	102	98	22	22.449	4.21482	367|2047|2099|2324|2625|2735|3845|4088|4763|4851|4854|4855|5058|5290|5914|5921|6714|7010|7494|9289|9968|29072	AR|EPHB1|ESR1|FLT4|GATA3|GLI1|KRAS|SMAD3|NF1|NOTCH1|NOTCH3|NOTCH4|PAK1|PIK3CA|RARA|RASA1|SRC|TEK|XBP1|ADGRG1|MED12|SETD2
1	-1.86874	GO:0022407	M1	1	0	GO Biological Processes	19	regulation of cell-cell adhesion	19_GO:0050789 regulation of biological process	-1.86874	1.69667	2.50397	714	73	98	17	17.3469	3.82497	1840|2064|2625|3123|3718|4851|4855|5290|5621|5781|5914|6597|6714|7494|10019|55193|57492	DTX1|ERBB2|GATA3|HLA-DRB1|JAK3|NOTCH1|NOTCH4|PIK3CA|PRNP|PTPN11|RARA|SMARCA4|SRC|XBP1|SH2B3|PBRM1|ARID1B
1	-1.86363	GO:0045580	M1	1	0	GO Biological Processes	19	regulation of T cell differentiation	19_GO:0002376 immune system process	-1.86363	2.00357	2.60385	714	40	98	11	11.2245	3.18872	673|1840|2064|2625|3123|3718|5914|6597|7494|55193|57492	BRAF|DTX1|ERBB2|GATA3|HLA-DRB1|JAK3|RARA|SMARCA4|XBP1|PBRM1|ARID1B
1	-1.84937	GO:0002064	M1	1	0	GO Biological Processes	19	epithelial cell development	19_GO:0032502 developmental process	-1.84937	2.08163	2.61545	714	35	98	10	10.2041	3.05775	367|2099|2195|4851|4855|5802|5914|6098|6714|171023	AR|ESR1|FAT1|NOTCH1|NOTCH4|PTPRS|RARA|ROS1|SRC|ASXL1
1	-1.84876	GO:0051052	M1	1	0	GO Biological Processes	19	regulation of DNA metabolic process	19_GO:0008152 metabolic process	-1.84876	1.62857	2.46097	714	85	98	19	19.3878	3.99348	472|545|2625|2735|3007|5290|5518|6597|6714|7157|9212|10111|23049|25913|29072|55193|57492|57634|201163	ATM|ATR|GATA3|GLI1|H1-3|PIK3CA|PPP2R1A|SMARCA4|SRC|TP53|AURKB|RAD50|SMG1|POT1|SETD2|PBRM1|ARID1B|EP400|FLCN
1	-1.84615	GO:0050769	M1	1	0	GO Biological Processes	19	positive regulation of neurogenesis	19_GO:0032502 developmental process	-1.84615	2.18571	2.64472	714	30	98	9	9.18367	2.91727	673|1524|2475|3845|4851|5584|6794|8867|23013	BRAF|CX3CR1|MTOR|KRAS|NOTCH1|PRKCI|STK11|SYNJ1|SPEN
1	-1.84416	GO:0044089	M1	1	0	GO Biological Processes	19	positive regulation of cellular component biogenesis	19_GO:0048518 positive regulation of biological process	-1.84416	1.76267	2.50483	714	62	98	15	15.3061	3.63702	324|472|545|673|1639|2047|2099|2475|4088|5058|5290|5336|6714|7010|7157	APC|ATM|ATR|BRAF|DCTN1|EPHB1|ESR1|MTOR|SMAD3|PAK1|PIK3CA|PLCG2|SRC|TEK|TP53
1	-1.83882	GO:2000177	M1	1	0	GO Biological Processes	19	regulation of neural precursor cell proliferation	19_GO:0050789 regulation of biological process	-1.83882	2.73214	2.79308	714	16	98	6	6.12245	2.42176	1524|2735|4763|4851|7157|9289	CX3CR1|GLI1|NF1|NOTCH1|TP53|ADGRG1
1	-1.83882	GO:0042734	M1	1	0	GO Cellular Components	20	presynaptic membrane		-1.83882	2.73214	2.79308	714	16	98	6	6.12245	2.42176	2064|2066|2903|5802|8301|9829	ERBB2|ERBB4|GRIN2A|PTPRS|PICALM|DNAJC6
1	-1.83882	GO:0005509	M1	1	0	GO Molecular Functions	21	calcium ion binding		-1.83882	2.73214	2.79308	714	16	98	6	6.12245	2.42176	673|867|2195|4851|4854|4855	BRAF|CBL|FAT1|NOTCH1|NOTCH3|NOTCH4
1	-1.83882	GO:0001223	M1	1	0	GO Molecular Functions	21	transcription coactivator binding		-1.83882	2.73214	2.79308	714	16	98	6	6.12245	2.42176	367|1387|2099|2625|4088|5914	AR|CREBBP|ESR1|GATA3|SMAD3|RARA
1	-1.82295	GO:0010720	M1	1	0	GO Biological Processes	19	positive regulation of cell development	19_GO:0032502 developmental process	-1.82295	1.71429	2.46818	714	68	98	16	16.3265	3.7336	673|1524|2475|2625|3123|3845|4851|5584|5914|6597|6794|7494|8867|23013|55193|57492	BRAF|CX3CR1|MTOR|GATA3|HLA-DRB1|KRAS|NOTCH1|PRKCI|RARA|SMARCA4|STK11|XBP1|SYNJ1|SPEN|PBRM1|ARID1B
1	-1.82133	GO:0031503	M1	1	0	GO Biological Processes	19	protein-containing complex localization	19_GO:0051179 localization	-1.82133	3.64286	2.99629	714	8	98	4	4.08163	1.99873	472|545|2064|2066	ATM|ATR|ERBB2|ERBB4
1	-1.82133	GO:0032212	M1	1	0	GO Biological Processes	19	positive regulation of telomere maintenance via telomerase	19_GO:0048518 positive regulation of biological process	-1.82133	3.64286	2.99629	714	8	98	4	4.08163	1.99873	472|545|9212|25913	ATM|ATR|AURKB|POT1
1	-1.82133	GO:0090399	M1	1	0	GO Biological Processes	19	replicative senescence	19_GO:0008152 metabolic process	-1.82133	3.64286	2.99629	714	8	98	4	4.08163	1.99873	472|545|7157|11200	ATM|ATR|TP53|CHEK2
1	-1.82133	GO:1900034	M1	1	0	GO Biological Processes	19	regulation of cellular response to heat	19_GO:0050896 response to stimulus	-1.82133	3.64286	2.99629	714	8	98	4	4.08163	1.99873	472|545|1387|2475	ATM|ATR|CREBBP|MTOR
1	-1.82133	GO:0060261	M1	1	0	GO Biological Processes	19	positive regulation of transcription initiation by RNA polymerase II	19_GO:0048518 positive regulation of biological process	-1.82133	3.64286	2.99629	714	8	98	4	4.08163	1.99873	2099|7157|9656|9968	ESR1|TP53|MDC1|MED12
1	-1.82133	R-HSA-5689896	M1	1	0	Reactome Gene Sets	6	Ovarian tumor domain proteases		-1.82133	3.64286	2.99629	714	8	98	4	4.08163	1.99873	324|2099|7128|7157	APC|ESR1|TNFAIP3|TP53
1	-1.80695	hsa04919	M1	1	0	KEGG Pathway	24	Thyroid hormone signaling pathway		-1.80695	1.90062	2.5171	714	46	98	12	12.2449	3.31132	1387|2099|2475|3845|4851|4854|4855|5290|5336|6714|7157|9968	CREBBP|ESR1|MTOR|KRAS|NOTCH1|NOTCH3|NOTCH4|PIK3CA|PLCG2|SRC|TP53|MED12
1	-1.80381	GO:0046777	M1	1	0	GO Biological Processes	19	protein autophosphorylation	19_GO:0008152 metabolic process	-1.80381	1.78947	2.47662	714	57	98	14	14.2857	3.5348	472|545|2047|2064|2066|2324|2475|5058|6714|6794|7010|9212|11200|23049	ATM|ATR|EPHB1|ERBB2|ERBB4|FLT4|MTOR|PAK1|SRC|STK11|TEK|AURKB|CHEK2|SMG1
1	-1.80166	GO:0043627	M1	1	0	GO Biological Processes	19	response to estrogen	19_GO:0050896 response to stimulus	-1.80166	3.03571	2.8347	714	12	98	5	5.10204	2.22273	367|2099|2625|5914|8085	AR|ESR1|GATA3|RARA|KMT2D
1	-1.80166	GO:0007422	M1	1	0	GO Biological Processes	19	peripheral nervous system development	19_GO:0032502 developmental process	-1.80166	3.03571	2.8347	714	12	98	5	5.10204	2.22273	2064|2115|4744|4763|9968	ERBB2|ETV1|NEFH|NF1|MED12
1	-1.80166	GO:0030010	M1	1	0	GO Biological Processes	19	establishment of cell polarity	19_GO:0009987 cellular process	-1.80166	3.03571	2.8347	714	12	98	5	5.10204	2.22273	1639|2047|2195|5584|6794	DCTN1|EPHB1|FAT1|PRKCI|STK11
1	-1.80166	GO:0021510	M1	1	0	GO Biological Processes	19	spinal cord development	19_GO:0032502 developmental process	-1.80166	3.03571	2.8347	714	12	98	5	5.10204	2.22273	1639|4763|4851|5802|9968	DCTN1|NF1|NOTCH1|PTPRS|MED12
1	-1.80166	GO:2000351	M1	1	0	GO Biological Processes	19	regulation of endothelial cell apoptotic process	19_GO:0050789 regulation of biological process	-1.80166	3.03571	2.8347	714	12	98	5	5.10204	2.22273	673|2625|5584|7010|7128	BRAF|GATA3|PRKCI|TEK|TNFAIP3
1	-1.80166	GO:0032587	M1	1	0	GO Cellular Components	20	ruffle membrane		-1.80166	3.03571	2.8347	714	12	98	5	5.10204	2.22273	324|2064|5058|5336|6714	APC|ERBB2|PAK1|PLCG2|SRC
1	-1.80166	hsa04330	M1	1	0	KEGG Pathway	24	Notch signaling pathway		-1.80166	3.03571	2.8347	714	12	98	5	5.10204	2.22273	1387|1840|4851|4854|4855	CREBBP|DTX1|NOTCH1|NOTCH3|NOTCH4
1	-1.77559	M17	M1	1	0	Canonical Pathways	11	PID NOTCH PATHWAY		-1.77559	2.42857	2.64858	714	21	98	7	7.14286	2.60154	867|1840|2625|4851|4854|4855|23013	CBL|DTX1|GATA3|NOTCH1|NOTCH3|NOTCH4|SPEN
1	-1.77559	GO:0032204	M1	1	0	GO Biological Processes	19	regulation of telomere maintenance	19_GO:0008152 metabolic process	-1.77559	2.42857	2.64858	714	21	98	7	7.14286	2.60154	472|545|6714|9212|10111|23049|25913	ATM|ATR|SRC|AURKB|RAD50|SMG1|POT1
1	-1.77559	GO:0014013	M1	1	0	GO Biological Processes	19	regulation of gliogenesis	19_GO:0032502 developmental process	-1.77559	2.42857	2.64858	714	21	98	7	7.14286	2.60154	2475|3845|4763|4851|5584|7157|8867	MTOR|KRAS|NF1|NOTCH1|PRKCI|TP53|SYNJ1
1	-1.77559	GO:2000779	M1	1	0	GO Biological Processes	19	regulation of double-strand break repair	19_GO:0050896 response to stimulus	-1.77559	2.42857	2.64858	714	21	98	7	7.14286	2.60154	545|6597|25913|29072|55193|57492|57634	ATR|SMARCA4|POT1|SETD2|PBRM1|ARID1B|EP400
1	-1.76023	GO:0007409	M1	1	0	GO Biological Processes	19	axonogenesis	19_GO:0032502 developmental process	-1.76023	2.02381	2.5126	714	36	98	10	10.2041	3.05775	2047|2064|2115|2625|4744|4851|4854|5781|6794|8301	EPHB1|ERBB2|ETV1|GATA3|NEFH|NOTCH1|NOTCH3|PTPN11|STK11|PICALM
1	-1.7515	GO:0042578	M1	1	0	GO Molecular Functions	21	phosphoric ester hydrolase activity		-1.7515	2.24176	2.57097	714	26	98	8	8.16327	2.76584	5336|5518|5781|5802|8867|9829|11122|25939	PLCG2|PPP2R1A|PTPN11|PTPRS|SYNJ1|DNAJC6|PTPRT|SAMHD1
1	-1.74913	GO:0051053	M1	1	0	GO Biological Processes	19	negative regulation of DNA metabolic process	19_GO:0048519 negative regulation of biological process	-1.74913	2.11521	2.53043	714	31	98	9	9.18367	2.91727	472|545|2625|3007|6714|7157|10111|25913|201163	ATM|ATR|GATA3|H1-3|SRC|TP53|RAD50|POT1|FLCN
1	-1.74209	GO:0045785	M1	1	0	GO Biological Processes	19	positive regulation of cell adhesion	19_GO:0048518 positive regulation of biological process	-1.74209	1.61905	2.35848	714	81	98	18	18.3673	3.91149	472|673|2064|2625|3123|3718|4088|5290|5781|5914|6597|6714|7010|7494|9289|55193|57492|201163	ATM|BRAF|ERBB2|GATA3|HLA-DRB1|JAK3|SMAD3|PIK3CA|PTPN11|RARA|SMARCA4|SRC|TEK|XBP1|ADGRG1|PBRM1|ARID1B|FLCN
1	-1.70009	GO:0000776	M1	1	0	GO Cellular Components	20	kinetochore		-1.70009	2.57143	2.61379	714	17	98	6	6.12245	2.42176	324|1639|6597|8243|9212|55193	APC|DCTN1|SMARCA4|SMC1A|AURKB|PBRM1
1	-1.70009	R-HSA-9680350	M1	1	0	Reactome Gene Sets	6	Signaling by CSF1 (M-CSF) in myeloid cells		-1.70009	2.57143	2.61379	714	17	98	6	6.12245	2.42176	867|3845|5290|5336|5781|6714	CBL|KRAS|PIK3CA|PLCG2|PTPN11|SRC
1	-1.69647	GO:0070372	M1	1	0	GO Biological Processes	19	regulation of ERK1 and ERK2 cascade	19_GO:0023052 signaling	-1.69647	1.78706	2.37363	714	53	98	13	13.2653	3.42643	673|2047|2064|2066|2324|3123|4851|5781|6098|6714|7010|54206|201163	BRAF|EPHB1|ERBB2|ERBB4|FLT4|HLA-DRB1|NOTCH1|PTPN11|ROS1|SRC|TEK|ERRFI1|FLCN
1	-1.69647	R-HSA-5684996	M1	1	0	Reactome Gene Sets	6	MAPK1/MAPK3 signaling		-1.69647	1.78706	2.37363	714	53	98	13	13.2653	3.42643	673|2064|2066|3718|3845|4763|5290|5518|5781|5921|6714|7010|8660	BRAF|ERBB2|ERBB4|JAK3|KRAS|NF1|PIK3CA|PPP2R1A|PTPN11|RASA1|SRC|TEK|IRS2
1	-1.69041	GO:0038128	M1	1	0	GO Biological Processes	19	ERBB2 signaling pathway	19_GO:0023052 signaling	-1.69041	4.37143	3.01539	714	5	98	3	3.06122	1.74014	2064|2066|6714	ERBB2|ERBB4|SRC
1	-1.69041	GO:0045920	M1	1	0	GO Biological Processes	19	negative regulation of exocytosis	19_GO:0051179 localization	-1.69041	4.37143	3.01539	714	5	98	3	3.06122	1.74014	613|673|4851	BCR|BRAF|NOTCH1
1	-1.69041	GO:0060065	M1	1	0	GO Biological Processes	19	uterus development	19_GO:0022414 reproductive process	-1.69041	4.37143	3.01539	714	5	98	3	3.06122	1.74014	2099|2625|6714	ESR1|GATA3|SRC
1	-1.69041	GO:0060444	M1	1	0	GO Biological Processes	19	branching involved in mammary gland duct morphogenesis	19_GO:0032502 developmental process	-1.69041	4.37143	3.01539	714	5	98	3	3.06122	1.74014	367|2099|6714	AR|ESR1|SRC
1	-1.69041	GO:0033047	M1	1	0	GO Biological Processes	19	regulation of mitotic sister chromatid segregation	19_GO:0050789 regulation of biological process	-1.69041	4.37143	3.01539	714	5	98	3	3.06122	1.74014	324|472|9212	APC|ATM|AURKB
1	-1.69041	GO:0002437	M1	1	0	GO Biological Processes	19	inflammatory response to antigenic stimulus	19_GO:0002376 immune system process	-1.69041	4.37143	3.01539	714	5	98	3	3.06122	1.74014	2625|3123|4851	GATA3|HLA-DRB1|NOTCH1
1	-1.69041	GO:0048144	M1	1	0	GO Biological Processes	19	fibroblast proliferation	19_GO:0009987 cellular process	-1.69041	4.37143	3.01539	714	5	98	3	3.06122	1.74014	2099|4763|7157	ESR1|NF1|TP53
1	-1.69041	GO:0003382	M1	1	0	GO Biological Processes	19	epithelial cell morphogenesis	19_GO:0032502 developmental process	-1.69041	4.37143	3.01539	714	5	98	3	3.06122	1.74014	367|2195|4855	AR|FAT1|NOTCH4
1	-1.69041	GO:0120163	M1	1	0	GO Biological Processes	19	negative regulation of cold-induced thermogenesis	19_GO:0042592 homeostatic process	-1.69041	4.37143	3.01539	714	5	98	3	3.06122	1.74014	4851|6794|201163	NOTCH1|STK11|FLCN
1	-1.69041	GO:0043276	M1	1	0	GO Biological Processes	19	anoikis	19_GO:0009987 cellular process	-1.69041	4.37143	3.01539	714	5	98	3	3.06122	1.74014	2475|5290|6794	MTOR|PIK3CA|STK11
1	-1.69041	GO:0044291	M1	1	0	GO Cellular Components	20	cell-cell contact zone		-1.69041	4.37143	3.01539	714	5	98	3	3.06122	1.74014	5058|5290|201163	PAK1|PIK3CA|FLCN
1	-1.69041	GO:0070840	M1	1	0	GO Molecular Functions	21	dynein complex binding		-1.69041	4.37143	3.01539	714	5	98	3	3.06122	1.74014	324|4744|8934	APC|NEFH|RAB29
1	-1.69041	GO:0005112	M1	1	0	GO Molecular Functions	21	Notch binding		-1.69041	4.37143	3.01539	714	5	98	3	3.06122	1.74014	1840|4851|4855	DTX1|NOTCH1|NOTCH4
1	-1.69041	GO:0005518	M1	1	0	GO Molecular Functions	21	collagen binding		-1.69041	4.37143	3.01539	714	5	98	3	3.06122	1.74014	4088|5058|9289	SMAD3|PAK1|ADGRG1
1	-1.69041	R-HSA-1912420	M1	1	0	Reactome Gene Sets	6	Pre-NOTCH Processing in Golgi		-1.69041	4.37143	3.01539	714	5	98	3	3.06122	1.74014	4851|4854|4855	NOTCH1|NOTCH3|NOTCH4
1	-1.69041	R-HSA-5668914	M1	1	0	Reactome Gene Sets	6	Diseases of metabolism		-1.69041	4.37143	3.01539	714	5	98	3	3.06122	1.74014	4851|4854|4855	NOTCH1|NOTCH3|NOTCH4
1	-1.69041	R-HSA-9013508	M1	1	0	Reactome Gene Sets	6	NOTCH3 Intracellular Domain Regulates Transcription		-1.69041	4.37143	3.01539	714	5	98	3	3.06122	1.74014	1387|4851|4854	CREBBP|NOTCH1|NOTCH3
1	-1.69041	R-HSA-180292	M1	1	0	Reactome Gene Sets	6	GAB1 signalosome		-1.69041	4.37143	3.01539	714	5	98	3	3.06122	1.74014	5290|5781|6714	PIK3CA|PTPN11|SRC
1	-1.69041	R-HSA-3928664	M1	1	0	Reactome Gene Sets	6	Ephrin signaling		-1.69041	4.37143	3.01539	714	5	98	3	3.06122	1.74014	2047|5058|6714	EPHB1|PAK1|SRC
1	-1.66024	M81	M1	1	0	Canonical Pathways	11	PID CDC42 PATHWAY		-1.66024	2.31818	2.50323	714	22	98	7	7.14286	2.60154	324|673|867|2475|5058|5290|6714	APC|BRAF|CBL|MTOR|PAK1|PIK3CA|SRC
1	-1.66024	GO:0072657	M1	1	0	GO Biological Processes	19	protein localization to membrane	19_GO:0051179 localization	-1.66024	2.31818	2.50323	714	22	98	7	7.14286	2.60154	673|2064|2066|2903|5584|6653|8934	BRAF|ERBB2|ERBB4|GRIN2A|PRKCI|SORL1|RAB29
1	-1.66024	GO:0016311	M1	1	0	GO Biological Processes	19	dephosphorylation	19_GO:0008152 metabolic process	-1.66024	2.31818	2.50323	714	22	98	7	7.14286	2.60154	5518|5781|5802|6794|8867|9829|11122	PPP2R1A|PTPN11|PTPRS|STK11|SYNJ1|DNAJC6|PTPRT
1	-1.65758	GO:0099513	M1	1	0	GO Cellular Components	20	polymeric cytoskeletal fiber		-1.65758	2.04911	2.4203	714	32	98	9	9.18367	2.91727	324|1639|3123|4744|5058|6714|7010|8867|9212	APC|DCTN1|HLA-DRB1|NEFH|PAK1|SRC|TEK|SYNJ1|AURKB
1	-1.65038	GO:0090596	M1	1	0	GO Biological Processes	19	sensory organ morphogenesis	19_GO:0032502 developmental process	-1.65038	2.15873	2.44655	714	27	98	8	8.16327	2.76584	613|2047|2195|2625|4763|4851|5584|8575	BCR|EPHB1|FAT1|GATA3|NF1|NOTCH1|PRKCI|PRKRA
1	-1.64009	GO:1990778	M1	1	0	GO Biological Processes	19	protein localization to cell periphery	19_GO:0051179 localization	-1.64009	2.8022	2.61386	714	13	98	5	5.10204	2.22273	2064|2066|2903|6653|8934	ERBB2|ERBB4|GRIN2A|SORL1|RAB29
1	-1.64009	GO:1903531	M1	1	0	GO Biological Processes	19	negative regulation of secretion by cell	19_GO:0051179 localization	-1.64009	2.8022	2.61386	714	13	98	5	5.10204	2.22273	613|673|4763|4851|5781	BCR|BRAF|NF1|NOTCH1|PTPN11
1	-1.64009	GO:0005096	M1	1	0	GO Molecular Functions	21	GTPase activator activity		-1.64009	2.8022	2.61386	714	13	98	5	5.10204	2.22273	613|4763|5921|54206|201163	BCR|NF1|RASA1|ERRFI1|FLCN
1	-1.64009	GO:0030971	M1	1	0	GO Molecular Functions	21	receptor tyrosine kinase binding		-1.64009	2.8022	2.61386	714	13	98	5	5.10204	2.22273	867|5781|7157|8660|10019	CBL|PTPN11|TP53|IRS2|SH2B3
1	-1.64009	R-HSA-9013694	M1	1	0	Reactome Gene Sets	6	Signaling by NOTCH4		-1.64009	2.8022	2.61386	714	13	98	5	5.10204	2.22273	1387|2324|4088|4851|4855	CREBBP|FLT4|SMAD3|NOTCH1|NOTCH4
1	-1.64009	R-HSA-177929	M1	1	0	Reactome Gene Sets	6	Signaling by EGFR		-1.64009	2.8022	2.61386	714	13	98	5	5.10204	2.22273	867|3845|5290|5781|6714	CBL|KRAS|PIK3CA|PTPN11|SRC
1	-1.62949	GO:0000904	M1	1	0	GO Biological Processes	19	cell morphogenesis involved in differentiation	19_GO:0032502 developmental process	-1.62949	1.75397	2.29692	714	54	98	13	13.2653	3.42643	367|2047|2064|2115|2195|2625|4744|4851|4854|4855|5781|6794|8301	AR|EPHB1|ERBB2|ETV1|FAT1|GATA3|NEFH|NOTCH1|NOTCH3|NOTCH4|PTPN11|STK11|PICALM
1	-1.61385	M273	M1	1	0	Canonical Pathways	11	PID EPHA2 FWD PATHWAY		-1.61385	3.2381	2.69323	714	9	98	4	4.08163	1.99873	867|5058|5290|6714	CBL|PAK1|PIK3CA|SRC
1	-1.61385	GO:0002223	M1	1	0	GO Biological Processes	19	stimulatory C-type lectin receptor signaling pathway	19_GO:0044419 biological process involved in interspecies interaction between organisms	-1.61385	3.2381	2.69323	714	9	98	4	4.08163	1.99873	1387|5058|5336|6714	CREBBP|PAK1|PLCG2|SRC
1	-1.61385	GO:1990840	M1	1	0	GO Biological Processes	19	response to lectin	19_GO:0050896 response to stimulus	-1.61385	3.2381	2.69323	714	9	98	4	4.08163	1.99873	1387|5058|5336|6714	CREBBP|PAK1|PLCG2|SRC
1	-1.61385	GO:1990858	M1	1	0	GO Biological Processes	19	cellular response to lectin	19_GO:0050896 response to stimulus	-1.61385	3.2381	2.69323	714	9	98	4	4.08163	1.99873	1387|5058|5336|6714	CREBBP|PAK1|PLCG2|SRC
1	-1.61385	GO:2000179	M1	1	0	GO Biological Processes	19	positive regulation of neural precursor cell proliferation	19_GO:0048518 positive regulation of biological process	-1.61385	3.2381	2.69323	714	9	98	4	4.08163	1.99873	1524|2735|4851|9289	CX3CR1|GLI1|NOTCH1|ADGRG1
1	-1.61385	GO:2000209	M1	1	0	GO Biological Processes	19	regulation of anoikis	19_GO:0050789 regulation of biological process	-1.61385	3.2381	2.69323	714	9	98	4	4.08163	1.99873	4851|5290|6714|11200	NOTCH1|PIK3CA|SRC|CHEK2
1	-1.61385	GO:0050732	M1	1	0	GO Biological Processes	19	negative regulation of peptidyl-tyrosine phosphorylation	19_GO:0048519 negative regulation of biological process	-1.61385	3.2381	2.69323	714	9	98	4	4.08163	1.99873	867|5518|10019|54206	CBL|PPP2R1A|SH2B3|ERRFI1
1	-1.61385	GO:0007632	M1	1	0	GO Biological Processes	19	visual behavior	19_GO:0032501 multicellular organismal process	-1.61385	3.2381	2.69323	714	9	98	4	4.08163	1.99873	673|2903|3845|4763	BRAF|GRIN2A|KRAS|NF1
1	-1.61385	GO:0008542	M1	1	0	GO Biological Processes	19	visual learning	19_GO:0032501 multicellular organismal process	-1.61385	3.2381	2.69323	714	9	98	4	4.08163	1.99873	673|2903|3845|4763	BRAF|GRIN2A|KRAS|NF1
1	-1.58197	GO:0048732	M1	1	0	GO Biological Processes	19	gland development	19_GO:0032502 developmental process	-1.58197	1.56122	2.1826	714	84	98	18	18.3673	3.91149	367|472|673|2066|2099|2625|2735|4088|4763|4851|4855|5290|5914|6714|6794|7494|8660|171023	AR|ATM|BRAF|ERBB4|ESR1|GATA3|GLI1|SMAD3|NF1|NOTCH1|NOTCH4|PIK3CA|RARA|SRC|STK11|XBP1|IRS2|ASXL1
1	-1.5742	GO:0006887	M1	1	0	GO Biological Processes	19	exocytosis	19_GO:0051179 localization	-1.5742	2.42857	2.44681	714	18	98	6	6.12245	2.42176	613|673|867|4851|5058|8867	BCR|BRAF|CBL|NOTCH1|PAK1|SYNJ1
1	-1.5742	GO:0001655	M1	1	0	GO Biological Processes	19	urogenital system development	19_GO:0032502 developmental process	-1.5742	2.42857	2.44681	714	18	98	6	6.12245	2.42176	367|2099|2735|4851|5914|6794	AR|ESR1|GLI1|NOTCH1|RARA|STK11
1	-1.55353	GO:0045582	M1	1	0	GO Biological Processes	19	positive regulation of T cell differentiation	19_GO:0002376 immune system process	-1.55353	2.21739	2.3655	714	23	98	7	7.14286	2.60154	2625|3123|5914|6597|7494|55193|57492	GATA3|HLA-DRB1|RARA|SMARCA4|XBP1|PBRM1|ARID1B
1	-1.55353	R-HSA-190236	M1	1	0	Reactome Gene Sets	6	Signaling by FGFR		-1.55353	2.21739	2.3655	714	23	98	7	7.14286	2.60154	673|867|3845|5290|5518|5781|6714	BRAF|CBL|KRAS|PIK3CA|PPP2R1A|PTPN11|SRC
1	-1.53791	GO:0009314	M1	1	0	GO Biological Processes	19	response to radiation	19_GO:0050896 response to stimulus	-1.53791	1.63113	2.16307	714	67	98	15	15.3061	3.63702	472|545|673|867|1387|1788|2625|2903|3845|4763|6794|7157|8243|9212|11200	ATM|ATR|BRAF|CBL|CREBBP|DNMT3A|GATA3|GRIN2A|KRAS|NF1|STK11|TP53|SMC1A|AURKB|CHEK2
1	-1.52283	GO:0050804	M1	1	0	GO Biological Processes	19	modulation of chemical synaptic transmission	19_GO:0023052 signaling	-1.52283	1.74857	2.18777	714	50	98	12	12.2449	3.31132	613|673|1524|2047|2903|3845|4744|4763|5621|5802|5914|6714	BCR|BRAF|CX3CR1|EPHB1|GRIN2A|KRAS|NEFH|NF1|PRNP|PTPRS|RARA|SRC
1	-1.52283	GO:0099177	M1	1	0	GO Biological Processes	19	regulation of trans-synaptic signaling	19_GO:0023052 signaling	-1.52283	1.74857	2.18777	714	50	98	12	12.2449	3.31132	613|673|1524|2047|2903|3845|4744|4763|5621|5802|5914|6714	BCR|BRAF|CX3CR1|EPHB1|GRIN2A|KRAS|NEFH|NF1|PRNP|PTPRS|RARA|SRC
1	-1.51846	GO:0046903	M1	1	0	GO Biological Processes	19	secretion	19_GO:0051179 localization	-1.51846	1.86813	2.22246	714	39	98	10	10.2041	3.05775	613|673|867|2066|2625|4763|4851|5058|5584|8867	BCR|BRAF|CBL|ERBB4|GATA3|NF1|NOTCH1|PAK1|PRKCI|SYNJ1
1	-1.51846	GO:0071216	M1	1	0	GO Biological Processes	19	cellular response to biotic stimulus	19_GO:0050896 response to stimulus	-1.51846	1.86813	2.22246	714	39	98	10	10.2041	3.05775	613|1524|4851|5336|5914|6714|7128|7157|7494|8243	BCR|CX3CR1|NOTCH1|PLCG2|RARA|SRC|TNFAIP3|TP53|XBP1|SMC1A
1	-1.49733	GO:1904356	M1	1	0	GO Biological Processes	19	regulation of telomere maintenance via telomere lengthening	19_GO:0008152 metabolic process	-1.49733	2.60204	2.41299	714	14	98	5	5.10204	2.22273	472|545|6714|9212|25913	ATM|ATR|SRC|AURKB|POT1
1	-1.49733	GO:2001251	M1	1	0	GO Biological Processes	19	negative regulation of chromosome organization	19_GO:0048519 negative regulation of biological process	-1.49733	2.60204	2.41299	714	14	98	5	5.10204	2.22273	324|472|6714|10111|25913	APC|ATM|SRC|RAD50|POT1
1	-1.49733	GO:0051048	M1	1	0	GO Biological Processes	19	negative regulation of secretion	19_GO:0051179 localization	-1.49733	2.60204	2.41299	714	14	98	5	5.10204	2.22273	613|673|4763|4851|5781	BCR|BRAF|NF1|NOTCH1|PTPN11
1	-1.49733	GO:0061041	M1	1	0	GO Biological Processes	19	regulation of wound healing	19_GO:0050896 response to stimulus	-1.49733	2.60204	2.41299	714	14	98	5	5.10204	2.22273	2475|4088|7128|7494|10019	MTOR|SMAD3|TNFAIP3|XBP1|SH2B3
1	-1.49733	GO:0007163	M1	1	0	GO Biological Processes	19	establishment or maintenance of cell polarity	19_GO:0009987 cellular process	-1.49733	2.60204	2.41299	714	14	98	5	5.10204	2.22273	1639|2047|2195|5584|6794	DCTN1|EPHB1|FAT1|PRKCI|STK11
1	-1.48997	GO:1903037	M1	1	0	GO Biological Processes	19	regulation of leukocyte cell-cell adhesion	19_GO:0050789 regulation of biological process	-1.48997	1.64516	2.11889	714	62	98	14	14.2857	3.5348	1840|2064|2625|3123|3718|5290|5621|5781|5914|6597|6714|7494|55193|57492	DTX1|ERBB2|GATA3|HLA-DRB1|JAK3|PIK3CA|PRNP|PTPN11|RARA|SMARCA4|SRC|XBP1|PBRM1|ARID1B
1	-1.48283	GO:0032386	M1	1	0	GO Biological Processes	19	regulation of intracellular transport	19_GO:0051179 localization	-1.48283	1.78095	2.15717	714	45	98	11	11.2245	3.18872	2064|4088|4744|4763|5621|5781|6653|6714|6794|8934|29072	ERBB2|SMAD3|NEFH|NF1|PRNP|PTPN11|SORL1|SRC|STK11|RAB29|SETD2
1	-1.46682	GO:0046578	M1	1	0	GO Biological Processes	19	regulation of Ras protein signal transduction	19_GO:0023052 signaling	-1.46682	2.00985	2.21299	714	29	98	8	8.16327	2.76584	613|867|3845|4763|4851|6714|9289|201163	BCR|CBL|KRAS|NF1|NOTCH1|SRC|ADGRG1|FLCN
1	-1.45947	GO:0001726	M1	1	0	GO Cellular Components	20	ruffle		-1.45947	2.30075	2.29058	714	19	98	6	6.12245	2.42176	324|2064|5058|5336|5921|6714	APC|ERBB2|PAK1|PLCG2|RASA1|SRC
1	-1.45947	GO:0000779	M1	1	0	GO Cellular Components	20	condensed chromosome, centromeric region		-1.45947	2.30075	2.29058	714	19	98	6	6.12245	2.42176	324|1639|6597|8243|9212|55193	APC|DCTN1|SMARCA4|SMC1A|AURKB|PBRM1
1	-1.45879	R-HSA-5673001	M1	1	0	Reactome Gene Sets	6	RAF/MAP kinase cascade		-1.45879	1.71429	2.10993	714	51	98	12	12.2449	3.31132	673|2064|2066|3718|3845|4763|5290|5518|5921|6714|7010|8660	BRAF|ERBB2|ERBB4|JAK3|KRAS|NF1|PIK3CA|PPP2R1A|RASA1|SRC|TEK|IRS2
1	-1.45456	GO:0007093	M1	1	0	GO Biological Processes	19	mitotic cell cycle checkpoint signaling	19_GO:0023052 signaling	-1.45456	2.125	2.23461	714	24	98	7	7.14286	2.60154	324|472|7157|9212|9656|10111|11200	APC|ATM|TP53|AURKB|MDC1|RAD50|CHEK2
1	-1.45456	GO:1903034	M1	1	0	GO Biological Processes	19	regulation of response to wounding	19_GO:0050896 response to stimulus	-1.45456	2.125	2.23461	714	24	98	7	7.14286	2.60154	673|2475|4088|5802|7128|7494|10019	BRAF|MTOR|SMAD3|PTPRS|TNFAIP3|XBP1|SH2B3
1	-1.45456	GO:0060348	M1	1	0	GO Biological Processes	19	bone development	19_GO:0032502 developmental process	-1.45456	2.125	2.23461	714	24	98	7	7.14286	2.60154	2778|5781|5914|6714|7157|10019|171023	GNAS|PTPN11|RARA|SRC|TP53|SH2B3|ASXL1
1	-1.45456	GO:0045177	M1	1	0	GO Cellular Components	20	apical part of cell		-1.45456	2.125	2.23461	714	24	98	7	7.14286	2.60154	2064|2195|2778|4851|5584|7010|8972	ERBB2|FAT1|GNAS|NOTCH1|PRKCI|TEK|MGAM
1	-1.44556	GO:0061564	M1	1	0	GO Biological Processes	19	axon development	19_GO:0032502 developmental process	-1.44556	1.82143	2.13126	714	40	98	10	10.2041	3.05775	2047|2064|2115|2625|4744|4851|4854|5781|6794|8301	EPHB1|ERBB2|ETV1|GATA3|NEFH|NOTCH1|NOTCH3|PTPN11|STK11|PICALM
1	-1.44556	GO:0098793	M1	1	0	GO Cellular Components	20	presynapse		-1.44556	1.82143	2.13126	714	40	98	10	10.2041	3.05775	673|2064|2066|2903|4763|5621|5802|8301|8867|9829	BRAF|ERBB2|ERBB4|GRIN2A|NF1|PRNP|PTPRS|PICALM|SYNJ1|DNAJC6
1	-1.44306	GO:0048608	M1	1	0	GO Biological Processes	19	reproductive structure development	19_GO:0022414 reproductive process	-1.44306	1.66165	2.07565	714	57	98	13	13.2653	3.42643	367|472|867|2099|2625|2735|4851|5781|5914|6714|6794|7812|9289	AR|ATM|CBL|ESR1|GATA3|GLI1|NOTCH1|PTPN11|RARA|SRC|STK11|CSDE1|ADGRG1
1	-1.44306	GO:0061458	M1	1	0	GO Biological Processes	19	reproductive system development	19_GO:0032502 developmental process	-1.44306	1.66165	2.07565	714	57	98	13	13.2653	3.42643	367|472|867|2099|2625|2735|4851|5781|5914|6714|6794|7812|9289	AR|ATM|CBL|ESR1|GATA3|GLI1|NOTCH1|PTPN11|RARA|SRC|STK11|CSDE1|ADGRG1
1	-1.44306	hsa05224	M1	1	0	KEGG Pathway	24	Breast cancer		-1.44306	1.66165	2.07565	714	57	98	13	13.2653	3.42643	324|673|1871|2064|2099|2324|2475|3845|4851|4854|4855|5290|7157	APC|BRAF|E2F3|ERBB2|ESR1|FLT4|MTOR|KRAS|NOTCH1|NOTCH3|NOTCH4|PIK3CA|TP53
1	-1.43957	GO:0032205	M1	1	0	GO Biological Processes	19	negative regulation of telomere maintenance	19_GO:0048519 negative regulation of biological process	-1.43957	2.91429	2.4299	714	10	98	4	4.08163	1.99873	472|6714|10111|25913	ATM|SRC|RAD50|POT1
1	-1.43957	GO:1904358	M1	1	0	GO Biological Processes	19	positive regulation of telomere maintenance via telomere lengthening	19_GO:0048518 positive regulation of biological process	-1.43957	2.91429	2.4299	714	10	98	4	4.08163	1.99873	472|545|9212|25913	ATM|ATR|AURKB|POT1
1	-1.43957	GO:0002220	M1	1	0	GO Biological Processes	19	innate immune response activating cell surface receptor signaling pathway	19_GO:0044419 biological process involved in interspecies interaction between organisms	-1.43957	2.91429	2.4299	714	10	98	4	4.08163	1.99873	1387|5058|5336|6714	CREBBP|PAK1|PLCG2|SRC
1	-1.43957	GO:1902692	M1	1	0	GO Biological Processes	19	regulation of neuroblast proliferation	19_GO:0032502 developmental process	-1.43957	2.91429	2.4299	714	10	98	4	4.08163	1.99873	1524|4763|4851|7157	CX3CR1|NF1|NOTCH1|TP53
1	-1.43957	GO:0060260	M1	1	0	GO Biological Processes	19	regulation of transcription initiation by RNA polymerase II	19_GO:0008152 metabolic process	-1.43957	2.91429	2.4299	714	10	98	4	4.08163	1.99873	2099|7157|9656|9968	ESR1|TP53|MDC1|MED12
1	-1.43957	GO:2000352	M1	1	0	GO Biological Processes	19	negative regulation of endothelial cell apoptotic process	19_GO:0048519 negative regulation of biological process	-1.43957	2.91429	2.4299	714	10	98	4	4.08163	1.99873	673|2625|7010|7128	BRAF|GATA3|TEK|TNFAIP3
1	-1.43957	GO:1901532	M1	1	0	GO Biological Processes	19	regulation of hematopoietic progenitor cell differentiation	19_GO:0032502 developmental process	-1.43957	2.91429	2.4299	714	10	98	4	4.08163	1.99873	4851|5914|9739|201163	NOTCH1|RARA|SETD1A|FLCN
1	-1.43957	GO:0140296	M1	1	0	GO Molecular Functions	21	general transcription initiation factor binding		-1.43957	2.91429	2.4299	714	10	98	4	4.08163	1.99873	367|2099|2475|7157	AR|ESR1|MTOR|TP53
1	-1.43957	R-HSA-210993	M1	1	0	Reactome Gene Sets	6	Tie2 Signaling		-1.43957	2.91429	2.4299	714	10	98	4	4.08163	1.99873	3845|5290|5781|7010	KRAS|PIK3CA|PTPN11|TEK
1	-1.43957	R-HSA-453274	M1	1	0	Reactome Gene Sets	6	Mitotic G2-G2/M phases		-1.43957	2.91429	2.4299	714	10	98	4	4.08163	1.99873	1639|1871|5518|7157	DCTN1|E2F3|PPP2R1A|TP53
1	-1.43462	GO:0060749	M1	1	0	GO Biological Processes	19	mammary gland alveolus development	19_GO:0032502 developmental process	-1.43462	3.64286	2.5912	714	6	98	3	3.06122	1.74014	367|2066|2099	AR|ERBB4|ESR1
1	-1.43462	GO:0061377	M1	1	0	GO Biological Processes	19	mammary gland lobule development	19_GO:0032502 developmental process	-1.43462	3.64286	2.5912	714	6	98	3	3.06122	1.74014	367|2066|2099	AR|ERBB4|ESR1
1	-1.43462	GO:0033145	M1	1	0	GO Biological Processes	19	positive regulation of intracellular steroid hormone receptor signaling pathway	19_GO:0023052 signaling	-1.43462	3.64286	2.5912	714	6	98	3	3.06122	1.74014	367|5058|8085	AR|PAK1|KMT2D
1	-1.43462	GO:0033148	M1	1	0	GO Biological Processes	19	positive regulation of intracellular estrogen receptor signaling pathway	19_GO:0023052 signaling	-1.43462	3.64286	2.5912	714	6	98	3	3.06122	1.74014	367|5058|8085	AR|PAK1|KMT2D
1	-1.43462	GO:0071353	M1	1	0	GO Biological Processes	19	cellular response to interleukin-4	19_GO:0050896 response to stimulus	-1.43462	3.64286	2.5912	714	6	98	3	3.06122	1.74014	2625|3718|7494	GATA3|JAK3|XBP1
1	-1.43462	GO:0045943	M1	1	0	GO Biological Processes	19	positive regulation of transcription by RNA polymerase I	19_GO:0048518 positive regulation of biological process	-1.43462	3.64286	2.5912	714	6	98	3	3.06122	1.74014	2064|2475|6597	ERBB2|MTOR|SMARCA4
1	-1.43462	GO:0010830	M1	1	0	GO Biological Processes	19	regulation of myotube differentiation	19_GO:0032502 developmental process	-1.43462	3.64286	2.5912	714	6	98	3	3.06122	1.74014	2475|4851|7494	MTOR|NOTCH1|XBP1
1	-1.43462	GO:0036465	M1	1	0	GO Biological Processes	19	synaptic vesicle recycling	19_GO:0051179 localization	-1.43462	3.64286	2.5912	714	6	98	3	3.06122	1.74014	8301|8867|9829	PICALM|SYNJ1|DNAJC6
1	-1.43462	GO:0048488	M1	1	0	GO Biological Processes	19	synaptic vesicle endocytosis	19_GO:0051179 localization	-1.43462	3.64286	2.5912	714	6	98	3	3.06122	1.74014	8301|8867|9829	PICALM|SYNJ1|DNAJC6
1	-1.43462	GO:0140238	M1	1	0	GO Biological Processes	19	presynaptic endocytosis	19_GO:0051179 localization	-1.43462	3.64286	2.5912	714	6	98	3	3.06122	1.74014	8301|8867|9829	PICALM|SYNJ1|DNAJC6
1	-1.43462	GO:0032691	M1	1	0	GO Biological Processes	19	negative regulation of interleukin-1 beta production	19_GO:0048519 negative regulation of biological process	-1.43462	3.64286	2.5912	714	6	98	3	3.06122	1.74014	1524|7128|54206	CX3CR1|TNFAIP3|ERRFI1
1	-1.43462	GO:0032703	M1	1	0	GO Biological Processes	19	negative regulation of interleukin-2 production	19_GO:0048519 negative regulation of biological process	-1.43462	3.64286	2.5912	714	6	98	3	3.06122	1.74014	2625|5621|7128	GATA3|PRNP|TNFAIP3
1	-1.43462	GO:0035335	M1	1	0	GO Biological Processes	19	peptidyl-tyrosine dephosphorylation	19_GO:0008152 metabolic process	-1.43462	3.64286	2.5912	714	6	98	3	3.06122	1.74014	5781|5802|11122	PTPN11|PTPRS|PTPRT
1	-1.43462	GO:0060768	M1	1	0	GO Biological Processes	19	regulation of epithelial cell proliferation involved in prostate gland development	19_GO:0022414 reproductive process	-1.43462	3.64286	2.5912	714	6	98	3	3.06122	1.74014	367|4851|6794	AR|NOTCH1|STK11
1	-1.43462	GO:0060039	M1	1	0	GO Biological Processes	19	pericardium development	19_GO:0032502 developmental process	-1.43462	3.64286	2.5912	714	6	98	3	3.06122	1.74014	4088|4851|29072	SMAD3|NOTCH1|SETD2
1	-1.43462	GO:0070884	M1	1	0	GO Biological Processes	19	regulation of calcineurin-NFAT signaling cascade	19_GO:0023052 signaling	-1.43462	3.64286	2.5912	714	6	98	3	3.06122	1.74014	2475|5336|5621	MTOR|PLCG2|PRNP
1	-1.43462	GO:0106056	M1	1	0	GO Biological Processes	19	regulation of calcineurin-mediated signaling	19_GO:0023052 signaling	-1.43462	3.64286	2.5912	714	6	98	3	3.06122	1.74014	2475|5336|5621	MTOR|PLCG2|PRNP
1	-1.43462	GO:0051262	M1	1	0	GO Biological Processes	19	protein tetramerization	19_GO:0009987 cellular process	-1.43462	3.64286	2.5912	714	6	98	3	3.06122	1.74014	3123|7157|25939	HLA-DRB1|TP53|SAMHD1
1	-1.43462	GO:0098839	M1	1	0	GO Cellular Components	20	postsynaptic density membrane		-1.43462	3.64286	2.5912	714	6	98	3	3.06122	1.74014	2066|2903|5802	ERBB4|GRIN2A|PTPRS
1	-1.43462	GO:0099634	M1	1	0	GO Cellular Components	20	postsynaptic specialization membrane		-1.43462	3.64286	2.5912	714	6	98	3	3.06122	1.74014	2066|2903|5802	ERBB4|GRIN2A|PTPRS
1	-1.43462	GO:0001091	M1	1	0	GO Molecular Functions	21	RNA polymerase II general transcription initiation factor binding		-1.43462	3.64286	2.5912	714	6	98	3	3.06122	1.74014	367|2099|7157	AR|ESR1|TP53
1	-1.43462	M5951	M1	1	0	Hallmark Gene Sets	23	HALLMARK SPERMATOGENESIS		-1.43462	3.64286	2.5912	714	6	98	3	3.06122	1.74014	673|2475|4744	BRAF|MTOR|NEFH
1	-1.43462	M2875	M1	1	0	Oncogenic Signatures	4	KRAS.300 UP.V1 UP		-1.43462	3.64286	2.5912	714	6	98	3	3.06122	1.74014	2115|2903|6653	ETV1|GRIN2A|SORL1
1	-1.43462	R-HSA-1963642	M1	1	0	Reactome Gene Sets	6	PI3K events in ERBB2 signaling		-1.43462	3.64286	2.5912	714	6	98	3	3.06122	1.74014	2064|2066|5290	ERBB2|ERBB4|PIK3CA
1	-1.43462	R-HSA-202433	M1	1	0	Reactome Gene Sets	6	Generation of second messenger molecules		-1.43462	3.64286	2.5912	714	6	98	3	3.06122	1.74014	3123|5058|5336	HLA-DRB1|PAK1|PLCG2
1	-1.43462	R-HSA-418555	M1	1	0	Reactome Gene Sets	6	G alpha (s) signalling events		-1.43462	3.64286	2.5912	714	6	98	3	3.06122	1.74014	2778|6714|7253	GNAS|SRC|TSHR
1	-1.42878	hsa05206	M1	1	0	KEGG Pathway	24	MicroRNAs in cancer		-1.42878	1.58385	2.03383	714	69	98	15	15.3061	3.63702	324|472|1387|1788|1871|2064|2475|3845|4851|4854|4855|5290|5336|7157|8660	APC|ATM|CREBBP|DNMT3A|E2F3|ERBB2|MTOR|KRAS|NOTCH1|NOTCH3|NOTCH4|PIK3CA|PLCG2|TP53|IRS2
1	-1.4278	GO:0030855	M1	1	0	GO Biological Processes	19	epithelial cell differentiation	19_GO:0032502 developmental process	-1.4278	1.55429	2.02247	714	75	98	16	16.3265	3.7336	367|613|2066|2099|2195|2625|2735|3845|4088|4851|4855|5802|5914|6098|6714|171023	AR|BCR|ERBB4|ESR1|FAT1|GATA3|GLI1|KRAS|SMAD3|NOTCH1|NOTCH4|PTPRS|RARA|ROS1|SRC|ASXL1
1	-1.4278	GO:1901214	M1	1	0	GO Biological Processes	19	regulation of neuron death	19_GO:0050789 regulation of biological process	-1.4278	1.55429	2.02247	714	75	98	16	16.3265	3.7336	472|673|867|1524|2047|2625|3845|4763|5290|5584|5621|5921|6653|7157|8301|8934	ATM|BRAF|CBL|CX3CR1|EPHB1|GATA3|KRAS|NF1|PIK3CA|PRKCI|PRNP|RASA1|SORL1|TP53|PICALM|RAB29
1	-1.4278	GO:1901652	M1	1	0	GO Biological Processes	19	response to peptide	19_GO:0050896 response to stimulus	-1.4278	1.55429	2.02247	714	75	98	16	16.3265	3.7336	324|2475|3718|4851|5290|5584|5621|6714|6794|7128|7157|7253|7494|8660|54206|57492	APC|MTOR|JAK3|NOTCH1|PIK3CA|PRKCI|PRNP|SRC|STK11|TNFAIP3|TP53|TSHR|XBP1|IRS2|ERRFI1|ARID1B
1	-1.4164	GO:2001020	M1	1	0	GO Biological Processes	19	regulation of response to DNA damage stimulus	19_GO:0050896 response to stimulus	-1.4164	1.74224	2.07444	714	46	98	11	11.2245	3.18872	472|545|6597|7157|11200|23049|25913|29072|55193|57492|57634	ATM|ATR|SMARCA4|TP53|CHEK2|SMG1|POT1|SETD2|PBRM1|ARID1B|EP400
1	-1.4164	GO:0048812	M1	1	0	GO Biological Processes	19	neuron projection morphogenesis	19_GO:0032502 developmental process	-1.4164	1.74224	2.07444	714	46	98	11	11.2245	3.18872	2047|2064|2115|2625|4744|4851|4854|5058|5781|6794|8301	EPHB1|ERBB2|ETV1|GATA3|NEFH|NOTCH1|NOTCH3|PAK1|PTPN11|STK11|PICALM
1	-1.4164	GO:0048858	M1	1	0	GO Biological Processes	19	cell projection morphogenesis	19_GO:0032502 developmental process	-1.4164	1.74224	2.07444	714	46	98	11	11.2245	3.18872	2047|2064|2115|2625|4744|4851|4854|5058|5781|6794|8301	EPHB1|ERBB2|ETV1|GATA3|NEFH|NOTCH1|NOTCH3|PAK1|PTPN11|STK11|PICALM
1	-1.4164	GO:0120039	M1	1	0	GO Biological Processes	19	plasma membrane bounded cell projection morphogenesis	19_GO:0032502 developmental process	-1.4164	1.74224	2.07444	714	46	98	11	11.2245	3.18872	2047|2064|2115|2625|4744|4851|4854|5058|5781|6794|8301	EPHB1|ERBB2|ETV1|GATA3|NEFH|NOTCH1|NOTCH3|PAK1|PTPN11|STK11|PICALM
1	-1.39729	GO:0051348	M1	1	0	GO Biological Processes	19	negative regulation of transferase activity	19_GO:0065007 biological regulation	-1.39729	1.68132	2.03372	714	52	98	12	12.2449	3.31132	324|867|4763|6653|6714|7128|7157|8660|10019|11122|25913|54206	APC|CBL|NF1|SORL1|SRC|TNFAIP3|TP53|IRS2|SH2B3|PTPRT|POT1|ERRFI1
1	-1.38339	GO:0000139	M1	1	0	GO Cellular Components	20	Golgi membrane		-1.38339	1.94286	2.10303	714	30	98	8	8.16327	2.76584	2475|3123|3845|4851|4854|4855|5584|6653	MTOR|HLA-DRB1|KRAS|NOTCH1|NOTCH3|NOTCH4|PRKCI|SORL1
1	-1.37901	GO:0002009	M1	1	0	GO Biological Processes	19	morphogenesis of an epithelium	19_GO:0032502 developmental process	-1.37901	1.59375	1.98429	714	64	98	14	14.2857	3.5348	367|2066|2099|2195|2625|3845|4088|4851|4855|5058|5914|6714|9968|29072	AR|ERBB4|ESR1|FAT1|GATA3|KRAS|SMAD3|NOTCH1|NOTCH4|PAK1|RARA|SRC|MED12|SETD2
1	-1.37901	R-HSA-5683057	M1	1	0	Reactome Gene Sets	6	MAPK family signaling cascades		-1.37901	1.59375	1.98429	714	64	98	14	14.2857	3.5348	673|2064|2066|3718|3845|4763|5058|5290|5518|5781|5921|6714|7010|8660	BRAF|ERBB2|ERBB4|JAK3|KRAS|NF1|PAK1|PIK3CA|PPP2R1A|PTPN11|RASA1|SRC|TEK|IRS2
1	-1.37613	GO:0031252	M1	1	0	GO Cellular Components	20	cell leading edge		-1.37613	1.777	2.04256	714	41	98	10	10.2041	3.05775	324|1639|2064|2195|5058|5290|5336|5584|5921|6714	APC|DCTN1|ERBB2|FAT1|PAK1|PIK3CA|PLCG2|PRKCI|RASA1|SRC
1	-1.37018	M82	M1	1	0	Canonical Pathways	11	PID RET PATHWAY		-1.37018	2.42857	2.22883	714	15	98	5	5.10204	2.22273	5290|5781|5921|6714|8660	PIK3CA|PTPN11|RASA1|SRC|IRS2
1	-1.37018	M92	M1	1	0	Canonical Pathways	11	PID ANGIOPOIETIN RECEPTOR PATHWAY		-1.37018	2.42857	2.22883	714	15	98	5	5.10204	2.22273	5058|5290|5781|5921|7010	PAK1|PIK3CA|PTPN11|RASA1|TEK
1	-1.37018	M16	M1	1	0	Canonical Pathways	11	PID INSULIN PATHWAY		-1.37018	2.42857	2.22883	714	15	98	5	5.10204	2.22273	867|5290|5584|5781|5921	CBL|PIK3CA|PRKCI|PTPN11|RASA1
1	-1.37018	GO:0032206	M1	1	0	GO Biological Processes	19	positive regulation of telomere maintenance	19_GO:0048518 positive regulation of biological process	-1.37018	2.42857	2.22883	714	15	98	5	5.10204	2.22273	472|545|9212|10111|25913	ATM|ATR|AURKB|RAD50|POT1
1	-1.37018	GO:0008017	M1	1	0	GO Molecular Functions	21	microtubule binding		-1.37018	2.42857	2.22883	714	15	98	5	5.10204	2.22273	324|1639|2735|4744|5621	APC|DCTN1|GLI1|NEFH|PRNP
1	-1.36259	GO:0051668	M1	1	0	GO Biological Processes	19	localization within membrane	19_GO:0051179 localization	-1.36259	2.04	2.1099	714	25	98	7	7.14286	2.60154	673|2064|2066|2903|5584|6653|8934	BRAF|ERBB2|ERBB4|GRIN2A|PRKCI|SORL1|RAB29
1	-1.36259	GO:1902893	M1	1	0	GO Biological Processes	19	regulation of miRNA transcription	19_GO:0008152 metabolic process	-1.36259	2.04	2.1099	714	25	98	7	7.14286	2.60154	367|2099|2625|4088|5914|6597|7157	AR|ESR1|GATA3|SMAD3|RARA|SMARCA4|TP53
1	-1.36259	GO:0008015	M1	1	0	GO Biological Processes	19	blood circulation	19_GO:0032501 multicellular organismal process	-1.36259	2.04	2.1099	714	25	98	7	7.14286	2.60154	367|613|2475|4088|5290|6714|7010	AR|BCR|MTOR|SMAD3|PIK3CA|SRC|TEK
1	-1.35452	M127	M1	1	0	Canonical Pathways	11	PID ERBB1 RECEPTOR PROXIMAL PATHWAY		-1.35452	2.18571	2.14379	714	20	98	6	6.12245	2.42176	3845|5058|5290|5781|5921|6714	KRAS|PAK1|PIK3CA|PTPN11|RASA1|SRC
1	-1.35452	GO:0010332	M1	1	0	GO Biological Processes	19	response to gamma radiation	19_GO:0050896 response to stimulus	-1.35452	2.18571	2.14379	714	20	98	6	6.12245	2.42176	472|545|867|2625|7157|11200	ATM|ATR|CBL|GATA3|TP53|CHEK2
1	-1.35452	GO:0034329	M1	1	0	GO Biological Processes	19	cell junction assembly	19_GO:0009987 cellular process	-1.35452	2.18571	2.14379	714	20	98	6	6.12245	2.42176	324|613|2066|6714|8934|201163	APC|BCR|ERBB4|SRC|RAB29|FLCN
1	-1.35452	GO:0120161	M1	1	0	GO Biological Processes	19	regulation of cold-induced thermogenesis	19_GO:0042592 homeostatic process	-1.35452	2.18571	2.14379	714	20	98	6	6.12245	2.42176	324|2778|4851|6794|7253|201163	APC|GNAS|NOTCH1|STK11|TSHR|FLCN
1	-1.35452	GO:0035264	M1	1	0	GO Biological Processes	19	multicellular organism growth	19_GO:0040007 growth	-1.35452	2.18571	2.14379	714	20	98	6	6.12245	2.42176	367|472|2475|5781|5914|7157	AR|ATM|MTOR|PTPN11|RARA|TP53
1	-1.35452	GO:1990782	M1	1	0	GO Molecular Functions	21	protein tyrosine kinase binding		-1.35452	2.18571	2.14379	714	20	98	6	6.12245	2.42176	867|5336|5781|7157|8660|10019	CBL|PLCG2|PTPN11|TP53|IRS2|SH2B3
1	-1.35283	GO:0001525	M1	1	0	GO Biological Processes	19	angiogenesis	19_GO:0032502 developmental process	-1.35283	1.70517	1.99363	714	47	98	11	11.2245	3.18872	2047|2324|4763|4851|4854|4855|5290|7010|7494|9289|29072	EPHB1|FLT4|NF1|NOTCH1|NOTCH3|NOTCH4|PIK3CA|TEK|XBP1|ADGRG1|SETD2
1	-1.35283	GO:0032102	M1	1	0	GO Biological Processes	19	negative regulation of response to external stimulus	19_GO:0048519 negative regulation of biological process	-1.35283	1.70517	1.99363	714	47	98	11	11.2245	3.18872	613|2625|3123|4088|4851|5802|6714|7010|7128|10019|25939	BCR|GATA3|HLA-DRB1|SMAD3|NOTCH1|PTPRS|SRC|TEK|TNFAIP3|SH2B3|SAMHD1
1	-1.35283	GO:0050730	M1	1	0	GO Biological Processes	19	regulation of peptidyl-tyrosine phosphorylation	19_GO:0008152 metabolic process	-1.35283	1.70517	1.99363	714	47	98	11	11.2245	3.18872	867|2066|2475|5336|5518|5621|5781|6714|7157|10019|54206	CBL|ERBB4|MTOR|PLCG2|PPP2R1A|PRNP|PTPN11|SRC|TP53|SH2B3|ERRFI1
1	-1.35283	GO:0001501	M1	1	0	GO Biological Processes	19	skeletal system development	19_GO:0032502 developmental process	-1.35283	1.70517	1.99363	714	47	98	11	11.2245	3.18872	2778|4088|5781|5914|6714|7157|8575|9968|10019|29072|171023	GNAS|SMAD3|PTPN11|RARA|SRC|TP53|PRKRA|MED12|SH2B3|SETD2|ASXL1
1	-1.33862	GO:0031334	M1	1	0	GO Biological Processes	19	positive regulation of protein-containing complex assembly	19_GO:0048518 positive regulation of biological process	-1.33862	1.82143	2.01592	714	36	98	9	9.18367	2.91727	472|545|1639|2099|2475|5058|5336|6714|7157	ATM|ATR|DCTN1|ESR1|MTOR|PAK1|PLCG2|SRC|TP53
1	-1.33862	GO:0051896	M1	1	0	GO Biological Processes	19	regulation of protein kinase B signaling	19_GO:0023052 signaling	-1.33862	1.82143	2.01592	714	36	98	9	9.18367	2.91727	1524|2475|2625|5290|6714|6794|7010|10019|201163	CX3CR1|MTOR|GATA3|PIK3CA|SRC|STK11|TEK|SH2B3|FLCN
1	-1.33862	GO:0022412	M1	1	0	GO Biological Processes	19	cellular process involved in reproduction in multicellular organism	19_GO:0022414 reproductive process	-1.33862	1.82143	2.01592	714	36	98	9	9.18367	2.91727	472|1788|2475|2735|5518|5914|6714|8085|10658	ATM|DNMT3A|MTOR|GLI1|PPP2R1A|RARA|SRC|KMT2D|CELF1
1	-1.33862	GO:0003713	M1	1	0	GO Molecular Functions	21	transcription coactivator activity		-1.33862	1.82143	2.01592	714	36	98	9	9.18367	2.91727	1387|1840|4851|6597|8085|9968|57492|58508|171023	CREBBP|DTX1|NOTCH1|SMARCA4|KMT2D|MED12|ARID1B|KMT2C|ASXL1
1	-1.33862	R-HSA-5633007	M1	1	0	Reactome Gene Sets	6	Regulation of TP53 Activity		-1.33862	1.82143	2.01592	714	36	98	9	9.18367	2.91727	472|545|2475|5518|6794|7157|9212|10111|11200	ATM|ATR|MTOR|PPP2R1A|STK11|TP53|AURKB|RAD50|CHEK2
1	-1.33821	GO:0060562	M1	1	0	GO Biological Processes	19	epithelial tube morphogenesis	19_GO:0032502 developmental process	-1.33821	1.6496	1.95906	714	53	98	12	12.2449	3.31132	367|2099|2625|3845|4088|4851|4855|5058|5914|6714|9968|29072	AR|ESR1|GATA3|KRAS|SMAD3|NOTCH1|NOTCH4|PAK1|RARA|SRC|MED12|SETD2
1	-1.32966	GO:0048871	M1	1	0	GO Biological Processes	19	multicellular organismal homeostasis	19_GO:0042592 homeostatic process	-1.32966	1.51391	1.90298	714	77	98	16	16.3265	3.7336	613|1524|2625|3718|3845|4763|4851|5290|5781|6714|6794|7128|9289|10019|171023|201163	BCR|CX3CR1|GATA3|JAK3|KRAS|NF1|NOTCH1|PIK3CA|PTPN11|SRC|STK11|TNFAIP3|ADGRG1|SH2B3|ASXL1|FLCN
1	-1.32966	GO:0000278	M1	1	0	GO Biological Processes	19	mitotic cell cycle	19_GO:0009987 cellular process	-1.32966	1.51391	1.90298	714	77	98	16	16.3265	3.7336	324|472|1639|1788|1871|5518|5781|5921|7157|8243|9212|9656|10111|11200|29072|55193	APC|ATM|DCTN1|DNMT3A|E2F3|PPP2R1A|PTPN11|RASA1|TP53|SMC1A|AURKB|MDC1|RAD50|CHEK2|SETD2|PBRM1
1	-1.32652	GO:0043086	M1	1	0	GO Biological Processes	19	negative regulation of catalytic activity	19_GO:0065007 biological regulation	-1.32652	1.53924	1.9084	714	71	98	15	15.3061	3.63702	324|867|4763|4851|5621|6653|6714|7128|7157|8301|8660|10019|11122|25913|54206	APC|CBL|NF1|NOTCH1|PRNP|SORL1|SRC|TNFAIP3|TP53|PICALM|IRS2|SH2B3|PTPRT|POT1|ERRFI1
1	-1.30997	GO:0048667	M1	1	0	GO Biological Processes	19	cell morphogenesis involved in neuron differentiation	19_GO:0032502 developmental process	-1.30997	1.73469	1.9562	714	42	98	10	10.2041	3.05775	2047|2064|2115|2625|4744|4851|4854|5781|6794|8301	EPHB1|ERBB2|ETV1|GATA3|NEFH|NOTCH1|NOTCH3|PTPN11|STK11|PICALM
1	-1.30997	hsa04012	M1	1	0	KEGG Pathway	24	ErbB signaling pathway		-1.30997	1.73469	1.9562	714	42	98	10	10.2041	3.05775	673|867|2064|2066|2475|3845|5058|5290|5336|6714	BRAF|CBL|ERBB2|ERBB4|MTOR|KRAS|PAK1|PIK3CA|PLCG2|SRC
1	-1.30494	GO:0032940	M1	1	0	GO Biological Processes	19	secretion by cell	19_GO:0051179 localization	-1.30494	1.88018	1.99715	714	31	98	8	8.16327	2.76584	613|673|867|2625|4763|4851|5058|8867	BCR|BRAF|CBL|GATA3|NF1|NOTCH1|PAK1|SYNJ1

## Sheet: all SNV PU1 Age CTRL
_MEMBER_MyList	_LogP_MyList	GO	_PATTERN_	_RANK_	GiniIndex	Category	CategoryID	Description	PARENT_GO	LogP	Enrichment	Z-score	#TotalGeneInLibrary	#GeneInGO	#GeneInHitList	#GeneInGOAndHitList	%InGO	STDV %InGO	GeneID	Hits	Log(q-value)	EvidenceCutoff	GROUP_ID	FirstInGroupByEnrichment	FirstInGroupByLogP	BestLogPInGroup	BestEnrichmentInGroup	URL
1	-3.65292	GO:1903829	M1	1	0	GO Biological Processes	19	positive regulation of protein localization	19_GO:0051179 localization	-3.65292	2.17517	4.03098	714	65	101	20	19.802	3.96529	142|324|975|1956|2064|2066|3091|5573|5584|5621|6653|6794|7015|8314|8398|8660|10347|23400|23682|65018	PARP1|APC|CD81|EGFR|ERBB2|ERBB4|HIF1A|PRKAR1A|PRKCI|PRNP|SORL1|STK11|TERT|BAP1|PLA2G6|IRS2|ABCA7|ATP13A2|RAB38|PINK1	0	0	1	1	1	-3.65292	5.30198
1	-3.41995	GO:0045171	M1	1	0	GO Cellular Components	20	intercellular bridge		-3.41995	7.06931	4.93759	714	4	101	4	3.9604	1.94059	1639|5584|11021|23064	DCTN1|PRKCI|RAB35|SETX	0	0	2	1	1	-3.41995	7.06931
1	-3.06608	R-HSA-1963640	M1	1	0	Reactome Gene Sets	6	GRB2 events in ERBB2 signaling		-3.06608	5.0495	4.36733	714	7	101	5	4.9505	2.15843	1956|2064|2066|3845|6654	EGFR|ERBB2|ERBB4|KRAS|SOS1	0	0	3	1	1	-3.06608	5.30198
1	-3.04232	GO:0006970	M1	1	0	GO Biological Processes	19	response to osmotic stress	19_GO:0050896 response to stimulus	-3.04232	4.24158	4.18742	714	10	101	6	5.94059	2.3521	1654|2185|2475|7054|7157|57521	DDX3X|PTK2B|MTOR|TH|TP53|RPTOR	0	0	4	1	1	-3.04232	5.30198
1	-2.96645	GO:0045834	M1	1	0	GO Biological Processes	19	positive regulation of lipid metabolic process	19_GO:0048518 positive regulation of biological process	-2.96645	2.82772	3.77351	714	25	101	10	9.90099	2.97193	134|975|2185|2321|2475|3667|8398|8660|23682|57521	ADORA1|CD81|PTK2B|FLT1|MTOR|IRS1|PLA2G6|IRS2|RAB38|RPTOR	0	0	5	1	1	-2.96645	2.82772
1	-2.96645	GO:0051668	M1	1	0	GO Biological Processes	19	localization within membrane	19_GO:0051179 localization	-2.96645	2.82772	3.77351	714	25	101	10	9.90099	2.97193	134|975|1956|2064|2066|5584|5727|6653|11021|23682	ADORA1|CD81|EGFR|ERBB2|ERBB4|PRKCI|PTCH1|SORL1|RAB35|RAB38	0	0	6	1	1	-2.96645	5.30198
1	-2.86443	GO:0002791	M1	1	0	GO Biological Processes	19	regulation of peptide secretion	19_GO:0051179 localization	-2.86443	3.53465	3.88516	714	14	101	7	6.93069	2.52715	134|2044|3091|3667|5573|8398|8660	ADORA1|EPHA5|HIF1A|IRS1|PRKAR1A|PLA2G6|IRS2	0	0	1	0	0	-3.65292	5.30198
1	-2.86443	GO:0090087	M1	1	0	GO Biological Processes	19	regulation of peptide transport	19_GO:0051179 localization	-2.86443	3.53465	3.88516	714	14	101	7	6.93069	2.52715	134|2044|3091|3667|5573|8398|8660	ADORA1|EPHA5|HIF1A|IRS1|PRKAR1A|PLA2G6|IRS2	0	0	1	0	0	-3.65292	5.30198
1	-2.79984	GO:0034250	M1	1	0	GO Biological Processes	19	positive regulation of amide metabolic process	19_GO:0048518 positive regulation of biological process	-2.79984	3.14191	3.73344	714	18	101	8	7.92079	2.68723	1654|1981|2043|2064|2185|2475|8398|65018	DDX3X|EIF4G1|EPHA4|ERBB2|PTK2B|MTOR|PLA2G6|PINK1	0	0	7	1	1	-2.79984	3.53465
1	-2.78947	GO:0072657	M1	1	0	GO Biological Processes	19	protein localization to membrane	19_GO:0051179 localization	-2.78947	2.89199	3.65639	714	22	101	9	8.91089	2.83487	134|975|1956|2064|2066|5584|5727|6653|23682	ADORA1|CD81|EGFR|ERBB2|ERBB4|PRKCI|PTCH1|SORL1|RAB38	0	0	6	0	0	-2.96645	5.30198
1	-2.69183	GO:0014823	M1	1	0	GO Biological Processes	19	response to activity	19_GO:0050896 response to stimulus	-2.69183	4.41832	3.94394	714	8	101	5	4.9505	2.15843	867|3091|6794|7054|8929	CBL|HIF1A|STK11|TH|PHOX2B	0	0	9	1	1	-2.69183	4.41832
1	-2.69183	GO:0007589	M1	1	0	GO Biological Processes	19	body fluid secretion	19_GO:0051179 localization	-2.69183	4.41832	3.94394	714	8	101	5	4.9505	2.15843	134|2066|3091|6777|9612	ADORA1|ERBB4|HIF1A|STAT5B|NCOR2	0	0	10	1	1	-2.69183	4.41832
1	-2.69183	GO:0005003	M1	1	0	GO Molecular Functions	21	ephrin receptor activity		-2.69183	4.41832	3.94394	714	8	101	5	4.9505	2.15843	2043|2044|2045|2047|4916	EPHA4|EPHA5|EPHA7|EPHB1|NTRK3	0	0	8	1	1	-2.69183	4.71287
1	-2.69183	R-HSA-1250196	M1	1	0	Reactome Gene Sets	6	SHC1 events in ERBB2 signaling		-2.69183	4.41832	3.94394	714	8	101	5	4.9505	2.15843	1956|2064|2066|3845|6654	EGFR|ERBB2|ERBB4|KRAS|SOS1	0	0	3	0	0	-3.06608	5.30198
1	-2.58909	GO:0034248	M1	1	0	GO Biological Processes	19	regulation of amide metabolic process	19_GO:0008152 metabolic process	-2.58909	2.07921	3.24421	714	51	101	15	14.8515	3.53845	1654|1981|2043|2064|2185|2475|4440|5166|5621|6653|7157|8398|10347|57521|65018	DDX3X|EIF4G1|EPHA4|ERBB2|PTK2B|MTOR|MSI1|PDK4|PRNP|SORL1|TP53|PLA2G6|ABCA7|RPTOR|PINK1	0	0	7	0	0	-2.79984	3.53465
1	-2.55931	GO:0043456	M1	1	0	GO Biological Processes	19	regulation of pentose-phosphate shunt	19_GO:0008152 metabolic process	-2.55931	7.06931	4.27307	714	3	101	3	2.9703	1.68924	2475|7157|57521	MTOR|TP53|RPTOR	0	0	11	0	0	-2.62791	7.06931
1	-2.55931	GO:1902031	M1	1	0	GO Biological Processes	19	regulation of NADP metabolic process	19_GO:0008152 metabolic process	-2.55931	7.06931	4.27307	714	3	101	3	2.9703	1.68924	2475|7157|57521	MTOR|TP53|RPTOR	0	0	11	0	0	-2.62791	7.06931
1	-2.55931	GO:0050775	M1	1	0	GO Biological Processes	19	positive regulation of dendrite morphogenesis	19_GO:0032502 developmental process	-2.55931	7.06931	4.27307	714	3	101	3	2.9703	1.68924	1523|2043|5789	CUX1|EPHA4|PTPRD	0	0	12	1	1	-2.55931	7.06931
1	-2.55931	GO:0010043	M1	1	0	GO Biological Processes	19	response to zinc ion	19_GO:0050896 response to stimulus	-2.55931	7.06931	4.27307	714	3	101	3	2.9703	1.68924	142|7054|23400	PARP1|TH|ATP13A2	0	0	13	1	1	-2.55931	7.06931
1	-2.50416	GO:0045727	M1	1	0	GO Biological Processes	19	positive regulation of translation	19_GO:0048518 positive regulation of biological process	-2.50416	3.53465	3.59183	714	12	101	6	5.94059	2.3521	1654|1981|2064|2185|2475|65018	DDX3X|EIF4G1|ERBB2|PTK2B|MTOR|PINK1	0	0	7	0	0	-2.79984	3.53465
1	-2.50416	GO:0016323	M1	1	0	GO Cellular Components	20	basolateral plasma membrane		-2.50416	3.53465	3.59183	714	12	101	6	5.94059	2.3521	134|975|1956|2064|2066|7253	ADORA1|CD81|EGFR|ERBB2|ERBB4|TSHR	0	0	6	0	0	-2.96645	5.30198
1	-2.50416	GO:0031594	M1	1	0	GO Cellular Components	20	neuromuscular junction		-2.50416	3.53465	3.59183	714	12	101	6	5.94059	2.3521	1399|2043|2045|2064|2066|5573	CRKL|EPHA4|EPHA7|ERBB2|ERBB4|PRKAR1A	0	0	8	0	0	-2.69183	4.71287
1	-2.50416	GO:0045211	M1	1	0	GO Cellular Components	20	postsynaptic membrane		-2.50416	3.53465	3.59183	714	12	101	6	5.94059	2.3521	134|1399|2043|2045|2066|4916	ADORA1|CRKL|EPHA4|EPHA7|ERBB4|NTRK3	0	0	8	0	0	-2.69183	4.71287
1	-2.49761	GO:0062012	M1	1	0	GO Biological Processes	19	regulation of small molecule metabolic process	19_GO:0008152 metabolic process	-2.49761	2.10575	3.1814	714	47	101	14	13.8614	3.43828	142|2185|2475|3091|3667|5166|5771|6794|7157|8660|9612|9759|57521|65018	PARP1|PTK2B|MTOR|HIF1A|IRS1|PDK4|PTPN2|STK11|TP53|IRS2|NCOR2|HDAC4|RPTOR|PINK1	0	0	14	1	1	-2.49761	2.74917
1	-2.46349	GO:0006109	M1	1	0	GO Biological Processes	19	regulation of carbohydrate metabolic process	19_GO:0008152 metabolic process	-2.46349	2.35644	3.23637	714	33	101	11	10.8911	3.09981	2185|2475|3091|3667|5166|5771|6794|7157|8660|9759|57521	PTK2B|MTOR|HIF1A|IRS1|PDK4|PTPN2|STK11|TP53|IRS2|HDAC4|RPTOR	0	0	14	0	0	-2.49761	2.74917
1	-2.44804	GO:0006140	M1	1	0	GO Biological Processes	19	regulation of nucleotide metabolic process	19_GO:0008152 metabolic process	-2.44804	2.82772	3.36295	714	20	101	8	7.92079	2.68723	142|2475|3091|5166|7157|9759|57521|65018	PARP1|MTOR|HIF1A|PDK4|TP53|HDAC4|RPTOR|PINK1	0	0	11	0	0	-2.62791	7.06931
1	-2.44804	GO:1900542	M1	1	0	GO Biological Processes	19	regulation of purine nucleotide metabolic process	19_GO:0008152 metabolic process	-2.44804	2.82772	3.36295	714	20	101	8	7.92079	2.68723	142|2475|3091|5166|7157|9759|57521|65018	PARP1|MTOR|HIF1A|PDK4|TP53|HDAC4|RPTOR|PINK1	0	0	11	0	0	-2.62791	7.06931
1	-2.39611	GO:0010675	M1	1	0	GO Biological Processes	19	regulation of cellular carbohydrate metabolic process	19_GO:0008152 metabolic process	-2.39611	2.43769	3.20623	714	29	101	10	9.90099	2.97193	2185|2475|3667|5166|5771|6794|7157|8660|9759|57521	PTK2B|MTOR|IRS1|PDK4|PTPN2|STK11|TP53|IRS2|HDAC4|RPTOR	0	0	14	0	0	-2.49761	2.74917
1	-2.39122	GO:0002793	M1	1	0	GO Biological Processes	19	positive regulation of peptide secretion	19_GO:0051179 localization	-2.39122	3.92739	3.58495	714	9	101	5	4.9505	2.15843	134|3091|5573|8398|8660	ADORA1|HIF1A|PRKAR1A|PLA2G6|IRS2	0	0	1	0	0	-3.65292	5.30198
1	-2.39122	GO:0042058	M1	1	0	GO Biological Processes	19	regulation of epidermal growth factor receptor signaling pathway	19_GO:0023052 signaling	-2.39122	3.92739	3.58495	714	9	101	5	4.9505	2.15843	134|867|1956|5771|6654	ADORA1|CBL|EGFR|PTPN2|SOS1	0	0	3	0	0	-3.06608	5.30198
1	-2.39122	GO:1901184	M1	1	0	GO Biological Processes	19	regulation of ERBB signaling pathway	19_GO:0023052 signaling	-2.39122	3.92739	3.58495	714	9	101	5	4.9505	2.15843	134|867|1956|5771|6654	ADORA1|CBL|EGFR|PTPN2|SOS1	0	0	3	0	0	-3.06608	5.30198
1	-2.39122	R-HSA-9665686	M1	1	0	Reactome Gene Sets	6	Signaling by ERBB2 TMD/JMD mutants		-2.39122	3.92739	3.58495	714	9	101	5	4.9505	2.15843	1956|2064|2066|3845|6654	EGFR|ERBB2|ERBB4|KRAS|SOS1	0	0	3	0	0	-3.06608	5.30198
1	-2.37807	hsa05206	M1	1	0	KEGG Pathway	24	MicroRNAs in cancer		-2.37807	1.84417	2.9926	714	69	101	18	17.8218	3.80797	324|1021|1387|1399|1788|1956|2064|2475|3667|3845|4854|6654|7157|8626|8651|8660|9759|57521	APC|CDK6|CREBBP|CRKL|DNMT3A|EGFR|ERBB2|MTOR|IRS1|KRAS|NOTCH3|SOS1|TP53|TP63|SOCS1|IRS2|HDAC4|RPTOR	0	0	15	1	1	-2.37807	5.30198
1	-2.34418	GO:0048814	M1	1	0	GO Biological Processes	19	regulation of dendrite morphogenesis	19_GO:0032502 developmental process	-2.34418	4.71287	3.70462	714	6	101	4	3.9604	1.94059	1523|2043|5789|6794	CUX1|EPHA4|PTPRD|STK11	0	0	12	0	0	-2.55931	7.06931
1	-2.34418	GO:0005004	M1	1	0	GO Molecular Functions	21	GPI-linked ephrin receptor activity		-2.34418	4.71287	3.70462	714	6	101	4	3.9604	1.94059	2043|2044|2045|4916	EPHA4|EPHA5|EPHA7|NTRK3	0	0	8	0	0	-2.69183	4.71287
1	-2.34418	GO:0005005	M1	1	0	GO Molecular Functions	21	transmembrane-ephrin receptor activity		-2.34418	4.71287	3.70462	714	6	101	4	3.9604	1.94059	2043|2044|2045|2047	EPHA4|EPHA5|EPHA7|EPHB1	0	0	8	0	0	-2.69183	4.71287
1	-2.34418	R-HSA-112412	M1	1	0	Reactome Gene Sets	6	SOS-mediated signalling		-2.34418	4.71287	3.70462	714	6	101	4	3.9604	1.94059	3667|3845|6654|8660	IRS1|KRAS|SOS1|IRS2	0	0	15	0	0	-2.37807	5.30198
1	-2.29339	GO:0032147	M1	1	0	GO Biological Processes	19	activation of protein kinase activity	19_GO:0048518 positive regulation of biological process	-2.29339	2.69307	3.19443	714	21	101	8	7.92079	2.68723	2185|2475|4916|5621|6794|8312|10892|65018	PTK2B|MTOR|NTRK3|PRNP|STK11|AXIN1|MALT1|PINK1	0	0	7	0	0	-2.79984	3.53465
1	-2.2878	GO:0050796	M1	1	0	GO Biological Processes	19	regulation of insulin secretion	19_GO:0051179 localization	-2.2878	3.26276	3.33984	714	13	101	6	5.94059	2.3521	2044|3091|3667|5573|8398|8660	EPHA5|HIF1A|IRS1|PRKAR1A|PLA2G6|IRS2	0	0	1	0	0	-3.65292	5.30198
1	-2.2878	GO:0090276	M1	1	0	GO Biological Processes	19	regulation of peptide hormone secretion	19_GO:0051179 localization	-2.2878	3.26276	3.33984	714	13	101	6	5.94059	2.3521	2044|3091|3667|5573|8398|8660	EPHA5|HIF1A|IRS1|PRKAR1A|PLA2G6|IRS2	0	0	1	0	0	-3.65292	5.30198
1	-2.23533	GO:0030424	M1	1	0	GO Cellular Components	20	axon		-2.23533	1.92799	2.90575	714	55	101	15	14.8515	3.53845	134|867|1639|2043|2044|2047|2185|3091|4916|5621|5727|7054|23064|65018|79890	ADORA1|CBL|DCTN1|EPHA4|EPHA5|EPHB1|PTK2B|HIF1A|NTRK3|PRNP|PTCH1|TH|SETX|PINK1|RIN3	0	0	16	1	1	-2.23533	2.23241
1	-2.22148	GO:0045580	M1	1	0	GO Biological Processes	19	regulation of T cell differentiation	19_GO:0002376 immune system process	-2.22148	2.12079	2.95938	714	40	101	12	11.8812	3.21961	639|1840|2064|2175|3662|5771|6654|6777|8289|8651|10892|55193	PRDM1|DTX1|ERBB2|FANCA|IRF4|PTPN2|SOS1|STAT5B|ARID1A|SOCS1|MALT1|PBRM1	0	0	17	1	1	-2.22148	2.12079
1	-2.1416	GO:0018027	M1	1	0	GO Biological Processes	19	peptidyl-lysine dimethylation	19_GO:0008152 metabolic process	-2.1416	3.53465	3.27422	714	10	101	5	4.9505	2.15843	8085|9739|9757|29072|84193	KMT2D|SETD1A|KMT2B|SETD2|SETD3	0	0	18	1	1	-2.1416	4.0396
1	-2.13791	GO:0019216	M1	1	0	GO Biological Processes	19	regulation of lipid metabolic process	19_GO:0008152 metabolic process	-2.13791	1.94059	2.82752	714	51	101	14	13.8614	3.43828	134|975|2185|2321|2475|3667|5166|6653|6777|8398|8660|10347|23682|57521	ADORA1|CD81|PTK2B|FLT1|MTOR|IRS1|PDK4|SORL1|STAT5B|PLA2G6|IRS2|ABCA7|RAB38|RPTOR	0	0	5	0	0	-2.96645	2.82772
1	-2.13454	GO:0003713	M1	1	0	GO Molecular Functions	21	transcription coactivator activity		-2.13454	2.16007	2.89731	714	36	101	11	10.8911	3.09981	1387|1840|3662|4261|5927|8085|8289|9968|58508|84193|171023	CREBBP|DTX1|IRF4|CIITA|KDM5A|KMT2D|ARID1A|MED12|KMT2C|SETD3|ASXL1	0	0	19	1	1	-2.13454	2.16007
1	-2.10995	M28	M1	1	0	Canonical Pathways	11	PID IL4 2PATHWAY		-2.10995	2.74917	3.04888	714	18	101	7	6.93069	2.52715	867|2475|3662|3667|6777|8651|8660	CBL|MTOR|IRF4|IRS1|STAT5B|SOCS1|IRS2	0	0	15	0	0	-2.37807	5.30198
1	-2.10995	GO:0045913	M1	1	0	GO Biological Processes	19	positive regulation of carbohydrate metabolic process	19_GO:0048518 positive regulation of biological process	-2.10995	2.74917	3.04888	714	18	101	7	6.93069	2.52715	2475|3091|3667|5771|6794|8660|57521	MTOR|HIF1A|IRS1|PTPN2|STK11|IRS2|RPTOR	0	0	14	0	0	-2.49761	2.74917
1	-2.09714	GO:0009925	M1	1	0	GO Cellular Components	20	basal plasma membrane		-2.09714	3.0297	3.11116	714	14	101	6	5.94059	2.3521	134|975|1956|2064|2066|7253	ADORA1|CD81|EGFR|ERBB2|ERBB4|TSHR	0	0	6	0	0	-2.96645	5.30198
1	-2.09714	GO:0045178	M1	1	0	GO Cellular Components	20	basal part of cell		-2.09714	3.0297	3.11116	714	14	101	6	5.94059	2.3521	134|975|1956|2064|2066|7253	ADORA1|CD81|EGFR|ERBB2|ERBB4|TSHR	0	0	6	0	0	-2.96645	5.30198
1	-2.05062	GO:0051962	M1	1	0	GO Biological Processes	19	positive regulation of nervous system development	19_GO:0032502 developmental process	-2.05062	2.20916	2.83884	714	32	101	10	9.90099	2.97193	1523|2043|2047|2475|3091|3845|5584|5789|6794|23013	CUX1|EPHA4|EPHB1|MTOR|HIF1A|KRAS|PRKCI|PTPRD|STK11|SPEN	0	0	12	0	0	-2.55931	7.06931
1	-2.04153	GO:0050730	M1	1	0	GO Biological Processes	19	regulation of peptidyl-tyrosine phosphorylation	19_GO:0008152 metabolic process	-2.04153	1.95534	2.74865	714	47	101	13	12.8713	3.3322	134|867|975|1956|2043|2045|2066|2185|2475|5621|5771|7157|8651	ADORA1|CBL|CD81|EGFR|EPHA4|EPHA7|ERBB4|PTK2B|MTOR|PRNP|PTPN2|TP53|SOCS1	0	0	20	1	1	-2.04153	1.95534
1	-2.02844	GO:0010035	M1	1	0	GO Biological Processes	19	response to inorganic substance	19_GO:0050896 response to stimulus	-2.02844	1.79538	2.68182	714	63	101	16	15.8416	3.63318	134|142|1788|1956|2185|3091|5621|5727|7015|7054|7157|8314|8929|23064|23400|65018	ADORA1|PARP1|DNMT3A|EGFR|PTK2B|HIF1A|PRNP|PTCH1|TERT|TH|TP53|BAP1|PHOX2B|SETX|ATP13A2|PINK1	0	0	4	0	0	-3.04232	5.30198
1	-2.02604	GO:0007595	M1	1	0	GO Biological Processes	19	lactation	19_GO:0051179 localization	-2.02604	4.0396	3.27817	714	7	101	4	3.9604	1.94059	2066|3091|6777|9612	ERBB4|HIF1A|STAT5B|NCOR2	0	0	10	0	0	-2.69183	4.41832
1	-2.02604	GO:0046889	M1	1	0	GO Biological Processes	19	positive regulation of lipid biosynthetic process	19_GO:0048518 positive regulation of biological process	-2.02604	4.0396	3.27817	714	7	101	4	3.9604	1.94059	2475|8398|23682|57521	MTOR|PLA2G6|RAB38|RPTOR	0	0	11	0	0	-2.62791	7.06931
1	-2.02604	GO:0097692	M1	1	0	GO Biological Processes	19	histone H3-K4 monomethylation	19_GO:0008152 metabolic process	-2.02604	4.0396	3.27817	714	7	101	4	3.9604	1.94059	8085|9739|9757|58508	KMT2D|SETD1A|KMT2B|KMT2C	0	0	18	0	0	-2.1416	4.0396
1	-2.01853	GO:0062013	M1	1	0	GO Biological Processes	19	positive regulation of small molecule metabolic process	19_GO:0048518 positive regulation of biological process	-2.01853	2.45889	2.88484	714	23	101	8	7.92079	2.68723	2475|3091|3667|5771|6794|8660|57521|65018	MTOR|HIF1A|IRS1|PTPN2|STK11|IRS2|RPTOR|PINK1	0	0	14	0	0	-2.49761	2.74917
1	-2.01853	GO:0097060	M1	1	0	GO Cellular Components	20	synaptic membrane		-2.01853	2.45889	2.88484	714	23	101	8	7.92079	2.68723	134|1399|2043|2045|2064|2066|4916|5789	ADORA1|CRKL|EPHA4|EPHA7|ERBB2|ERBB4|NTRK3|PTPRD	0	0	8	0	0	-2.69183	4.71287
1	-2.00464	M201	M1	1	0	Canonical Pathways	11	PID ERBB NETWORK PATHWAY		-2.00464	5.30198	3.49981	714	4	101	3	2.9703	1.68924	1956|2064|2066	EGFR|ERBB2|ERBB4	0	0	6	0	0	-2.96645	5.30198
1	-2.00464	GO:0061178	M1	1	0	GO Biological Processes	19	regulation of insulin secretion involved in cellular response to glucose stimulus	19_GO:0042592 homeostatic process	-2.00464	5.30198	3.49981	714	4	101	3	2.9703	1.68924	2044|3091|8398	EPHA5|HIF1A|PLA2G6	0	0	1	0	0	-3.65292	5.30198
1	-2.00464	GO:0045742	M1	1	0	GO Biological Processes	19	positive regulation of epidermal growth factor receptor signaling pathway	19_GO:0023052 signaling	-2.00464	5.30198	3.49981	714	4	101	3	2.9703	1.68924	134|867|6654	ADORA1|CBL|SOS1	0	0	3	0	0	-3.06608	5.30198
1	-2.00464	GO:1901186	M1	1	0	GO Biological Processes	19	positive regulation of ERBB signaling pathway	19_GO:0023052 signaling	-2.00464	5.30198	3.49981	714	4	101	3	2.9703	1.68924	134|867|6654	ADORA1|CBL|SOS1	0	0	3	0	0	-3.06608	5.30198
1	-2.00464	GO:0009651	M1	1	0	GO Biological Processes	19	response to salt stress	19_GO:0050896 response to stimulus	-2.00464	5.30198	3.49981	714	4	101	3	2.9703	1.68924	2185|7054|7157	PTK2B|TH|TP53	0	0	4	0	0	-3.04232	5.30198
1	-2.00464	GO:0099072	M1	1	0	GO Biological Processes	19	regulation of postsynaptic membrane neurotransmitter receptor levels	19_GO:0065007 biological regulation	-2.00464	5.30198	3.49981	714	4	101	3	2.9703	1.68924	2064|2066|5584	ERBB2|ERBB4|PRKCI	0	0	6	0	0	-2.96645	5.30198
1	-2.00464	GO:0043471	M1	1	0	GO Biological Processes	19	regulation of cellular carbohydrate catabolic process	19_GO:0008152 metabolic process	-2.00464	5.30198	3.49981	714	4	101	3	2.9703	1.68924	2475|7157|57521	MTOR|TP53|RPTOR	0	0	11	0	0	-2.62791	7.06931
1	-2.00464	GO:0010769	M1	1	0	GO Biological Processes	19	regulation of cell morphogenesis involved in differentiation	19_GO:0032502 developmental process	-2.00464	5.30198	3.49981	714	4	101	3	2.9703	1.68924	1523|2043|5789	CUX1|EPHA4|PTPRD	0	0	12	0	0	-2.55931	7.06931
1	-2.00464	GO:0010770	M1	1	0	GO Biological Processes	19	positive regulation of cell morphogenesis involved in differentiation	19_GO:0032502 developmental process	-2.00464	5.30198	3.49981	714	4	101	3	2.9703	1.68924	1523|2043|5789	CUX1|EPHA4|PTPRD	0	0	12	0	0	-2.55931	7.06931
1	-2.00464	GO:0050996	M1	1	0	GO Biological Processes	19	positive regulation of lipid catabolic process	19_GO:0048518 positive regulation of biological process	-2.00464	5.30198	3.49981	714	4	101	3	2.9703	1.68924	134|3667|8660	ADORA1|IRS1|IRS2	0	0	15	0	0	-2.37807	5.30198
1	-2.00464	GO:0036342	M1	1	0	GO Biological Processes	19	post-anal tail morphogenesis	19_GO:0032502 developmental process	-2.00464	5.30198	3.49981	714	4	101	3	2.9703	1.68924	8312|8626|9968	AXIN1|TP63|MED12	0	0	21	1	1	-2.00464	5.30198
1	-2.00464	GO:0021955	M1	1	0	GO Biological Processes	19	central nervous system neuron axonogenesis	19_GO:0032502 developmental process	-2.00464	5.30198	3.49981	714	4	101	3	2.9703	1.68924	2043|2047|8929	EPHA4|EPHB1|PHOX2B	0	0	22	1	1	-2.00464	5.30198
1	-2.00464	GO:0050849	M1	1	0	GO Biological Processes	19	negative regulation of calcium-mediated signaling	19_GO:0023052 signaling	-2.00464	5.30198	3.49981	714	4	101	3	2.9703	1.68924	2475|5621|123041	MTOR|PRNP|SLC24A4	0	0	24	1	1	-2.00464	5.30198
1	-2.00464	GO:0050805	M1	1	0	GO Biological Processes	19	negative regulation of synaptic transmission	19_GO:0023052 signaling	-2.00464	5.30198	3.49981	714	4	101	3	2.9703	1.68924	134|2185|8398	ADORA1|PTK2B|PLA2G6	0	0	25	1	1	-2.00464	5.30198
1	-2.00464	R-HSA-8847993	M1	1	0	Reactome Gene Sets	6	ERBB2 Activates PTK6 Signaling		-2.00464	5.30198	3.49981	714	4	101	3	2.9703	1.68924	1956|2064|2066	EGFR|ERBB2|ERBB4	0	0	6	0	0	-2.96645	5.30198
1	-2.00464	R-HSA-6811442	M1	1	0	Reactome Gene Sets	6	Intra-Golgi and retrograde Golgi-to-ER traffic		-2.00464	5.30198	3.49981	714	4	101	3	2.9703	1.68924	1523|1639|8398	CUX1|DCTN1|PLA2G6	0	0	23	1	1	-2.00464	5.30198
1	-1.991	GO:0008134	M1	1	0	GO Molecular Functions	21	transcription factor binding		-1.991	1.55654	2.56042	714	109	101	24	23.7624	4.23515	142|862|1387|1399|1654|1788|2072|2475|3091|4261|5771|6777|7015|7157|8289|9612|9739|9759|9968|11122|23013|57521|84193|171023	PARP1|RUNX1T1|CREBBP|CRKL|DDX3X|DNMT3A|ERCC4|MTOR|HIF1A|CIITA|PTPN2|STAT5B|TERT|TP53|ARID1A|NCOR2|SETD1A|HDAC4|MED12|PTPRT|SPEN|RPTOR|SETD3|ASXL1	0	0	19	0	0	-2.13454	2.16007
1	-1.92962	GO:1900087	M1	1	0	GO Biological Processes	19	positive regulation of G1/S transition of mitotic cell cycle	19_GO:0048518 positive regulation of biological process	-1.92962	3.21332	3.00081	714	11	101	5	4.9505	2.15843	1654|1956|1981|7015|57521	DDX3X|EGFR|EIF4G1|TERT|RPTOR	0	0	26	1	1	-1.92962	3.53465
1	-1.92962	GO:1903146	M1	1	0	GO Biological Processes	19	regulation of autophagy of mitochondrion	19_GO:0008152 metabolic process	-1.92962	3.21332	3.00081	714	11	101	5	4.9505	2.15843	3091|7157|23400|25793|65018	HIF1A|TP53|ATP13A2|FBXO7|PINK1	0	0	27	1	1	-1.92962	3.53465
1	-1.92962	R-HSA-1227990	M1	1	0	Reactome Gene Sets	6	Signaling by ERBB2 in Cancer		-1.92962	3.21332	3.00081	714	11	101	5	4.9505	2.15843	1956|2064|2066|3845|6654	EGFR|ERBB2|ERBB4|KRAS|SOS1	0	0	3	0	0	-3.06608	5.30198
1	-1.92962	R-HSA-9664565	M1	1	0	Reactome Gene Sets	6	Signaling by ERBB2 KD Mutants		-1.92962	3.21332	3.00081	714	11	101	5	4.9505	2.15843	1956|2064|2066|3845|6654	EGFR|ERBB2|ERBB4|KRAS|SOS1	0	0	3	0	0	-3.06608	5.30198
1	-1.92754	GO:0007173	M1	1	0	GO Biological Processes	19	epidermal growth factor receptor signaling pathway	19_GO:0023052 signaling	-1.92754	2.82772	2.90197	714	15	101	6	5.94059	2.3521	867|1956|2064|2066|2185|6654	CBL|EGFR|ERBB2|ERBB4|PTK2B|SOS1	0	0	3	0	0	-3.06608	5.30198
1	-1.9019	GO:0044297	M1	1	0	GO Cellular Components	20	cell body		-1.9019	1.83278	2.58186	714	54	101	14	13.8614	3.43828	134|1639|2043|2044|2045|2185|6653|6654|7054|23400|23682|57521|65018|79890	ADORA1|DCTN1|EPHA4|EPHA5|EPHA7|PTK2B|SORL1|SOS1|TH|ATP13A2|RAB38|RPTOR|PINK1|RIN3	0	0	28	1	1	-1.9019	1.83278
1	-1.88676	GO:0045859	M1	1	0	GO Biological Processes	19	regulation of protein kinase activity	19_GO:0008152 metabolic process	-1.88676	1.5285	2.45766	714	111	101	24	23.7624	4.23515	134|324|867|1654|1956|2043|2064|2185|2321|2475|4916|5573|5621|5771|6653|6654|6794|8312|8651|10892|11122|25793|57521|65018	ADORA1|APC|CBL|DDX3X|EGFR|EPHA4|ERBB2|PTK2B|FLT1|MTOR|NTRK3|PRKAR1A|PRNP|PTPN2|SORL1|SOS1|STK11|AXIN1|SOCS1|MALT1|PTPRT|FBXO7|RPTOR|PINK1	0	0	7	0	0	-2.79984	3.53465
1	-1.88676	GO:0045596	M1	1	0	GO Biological Processes	19	negative regulation of cell differentiation	19_GO:0032502 developmental process	-1.88676	1.5285	2.45766	714	111	101	24	23.7624	4.23515	862|1021|1840|1956|2043|2045|2047|2064|2185|3845|4854|4916|5727|5771|6653|6777|7157|8312|8626|8651|8929|9759|25793|171023	RUNX1T1|CDK6|DTX1|EGFR|EPHA4|EPHA7|EPHB1|ERBB2|PTK2B|KRAS|NOTCH3|NTRK3|PTCH1|PTPN2|SORL1|STAT5B|TP53|AXIN1|TP63|SOCS1|PHOX2B|HDAC4|FBXO7|ASXL1	0	0	29	1	1	-1.88676	1.5285
1	-1.87951	GO:0045619	M1	1	0	GO Biological Processes	19	regulation of lymphocyte differentiation	19_GO:0002376 immune system process	-1.87951	1.87553	2.57593	714	49	101	13	12.8713	3.3322	639|1840|2064|2175|3662|5771|6654|6777|8289|8651|10892|25793|55193	PRDM1|DTX1|ERBB2|FANCA|IRF4|PTPN2|SOS1|STAT5B|ARID1A|SOCS1|MALT1|FBXO7|PBRM1	0	0	17	0	0	-2.22148	2.12079
1	-1.86299	GO:0150034	M1	1	0	GO Cellular Components	20	distal axon		-1.86299	2.19392	2.6626	714	29	101	9	8.91089	2.83487	134|867|2043|2185|5621|5727|7054|23064|65018	ADORA1|CBL|EPHA4|PTK2B|PRNP|PTCH1|TH|SETX|PINK1	0	0	16	0	0	-2.23533	2.23241
1	-1.82414	GO:0003712	M1	1	0	GO Molecular Functions	21	transcription coregulator activity		-1.82414	1.71377	2.46899	714	66	101	16	15.8416	3.63318	862|1387|1788|1840|3662|4261|5927|8085|8289|9612|9968|23013|57713|58508|84193|171023	RUNX1T1|CREBBP|DNMT3A|DTX1|IRF4|CIITA|KDM5A|KMT2D|ARID1A|NCOR2|MED12|SPEN|SFMBT2|KMT2C|SETD3|ASXL1	0	0	19	0	0	-2.13454	2.16007
1	-1.80326	GO:0050767	M1	1	0	GO Biological Processes	19	regulation of neurogenesis	19_GO:0032502 developmental process	-1.80326	1.83802	2.49247	714	50	101	13	12.8713	3.3322	1523|2043|2045|2475|3091|3845|4916|5584|5789|6653|6794|7157|23013	CUX1|EPHA4|EPHA7|MTOR|HIF1A|KRAS|NTRK3|PRKCI|PTPRD|SORL1|STK11|TP53|SPEN	0	0	12	0	0	-2.55931	7.06931
1	-1.78175	GO:0007411	M1	1	0	GO Biological Processes	19	axon guidance	19_GO:0040011 locomotion	-1.78175	2.26218	2.60589	714	25	101	8	7.92079	2.68723	2043|2044|2045|2047|2064|4854|5727|6654	EPHA4|EPHA5|EPHA7|EPHB1|ERBB2|NOTCH3|PTCH1|SOS1	0	0	8	0	0	-2.69183	4.71287
1	-1.78175	GO:0097485	M1	1	0	GO Biological Processes	19	neuron projection guidance	19_GO:0040011 locomotion	-1.78175	2.26218	2.60589	714	25	101	8	7.92079	2.68723	2043|2044|2045|2047|2064|4854|5727|6654	EPHA4|EPHA5|EPHA7|EPHB1|ERBB2|NOTCH3|PTCH1|SOS1	0	0	8	0	0	-2.69183	4.71287
1	-1.77462	GO:0032024	M1	1	0	GO Biological Processes	19	positive regulation of insulin secretion	19_GO:0051179 localization	-1.77462	3.53465	2.9244	714	8	101	4	3.9604	1.94059	3091|5573|8398|8660	HIF1A|PRKAR1A|PLA2G6|IRS2	0	0	1	0	0	-3.65292	5.30198
1	-1.77462	GO:0090277	M1	1	0	GO Biological Processes	19	positive regulation of peptide hormone secretion	19_GO:0051179 localization	-1.77462	3.53465	2.9244	714	8	101	4	3.9604	1.94059	3091|5573|8398|8660	HIF1A|PRKAR1A|PLA2G6|IRS2	0	0	1	0	0	-3.65292	5.30198
1	-1.77462	GO:0007416	M1	1	0	GO Biological Processes	19	synapse assembly	19_GO:0032502 developmental process	-1.77462	3.53465	2.9244	714	8	101	4	3.9604	1.94059	1399|2066|4916|5789	CRKL|ERBB4|NTRK3|PTPRD	0	0	8	0	0	-2.69183	4.71287
1	-1.77462	GO:0050999	M1	1	0	GO Biological Processes	19	regulation of nitric-oxide synthase activity	19_GO:0065007 biological regulation	-1.77462	3.53465	2.9244	714	8	101	4	3.9604	1.94059	1956|2185|3091|7015	EGFR|PTK2B|HIF1A|TERT	0	0	30	1	1	-1.77462	4.24158
1	-1.77462	GO:0005771	M1	1	0	GO Cellular Components	20	multivesicular body		-1.77462	3.53465	2.9244	714	8	101	4	3.9604	1.94059	1956|5573|6653|23400	EGFR|PRKAR1A|SORL1|ATP13A2	0	0	31	1	1	-1.77462	3.53465
1	-1.77462	GO:0140945	M1	1	0	GO Molecular Functions	21	histone H3K4 monomethyltransferase activity		-1.77462	3.53465	2.9244	714	8	101	4	3.9604	1.94059	8085|9739|9757|58508	KMT2D|SETD1A|KMT2B|KMT2C	0	0	18	0	0	-2.1416	4.0396
1	-1.76643	hsa04910	M1	1	0	KEGG Pathway	24	Insulin signaling pathway		-1.76643	1.94406	2.49273	714	40	101	11	10.8911	3.09981	867|1399|2475|3667|3845|5573|5584|6654|8651|8660|57521	CBL|CRKL|MTOR|IRS1|KRAS|PRKAR1A|PRKCI|SOS1|SOCS1|IRS2|RPTOR	0	0	15	0	0	-2.37807	5.30198
1	-1.76183	GO:0050769	M1	1	0	GO Biological Processes	19	positive regulation of neurogenesis	19_GO:0032502 developmental process	-1.76183	2.12079	2.54409	714	30	101	9	8.91089	2.83487	1523|2043|2475|3091|3845|5584|5789|6794|23013	CUX1|EPHA4|MTOR|HIF1A|KRAS|PRKCI|PTPRD|STK11|SPEN	0	0	12	0	0	-2.55931	7.06931
1	-1.74662	GO:0030010	M1	1	0	GO Biological Processes	19	establishment of cell polarity	19_GO:0009987 cellular process	-1.74662	2.94554	2.75701	714	12	101	5	4.9505	2.15843	1399|1639|2047|5584|6794	CRKL|DCTN1|EPHB1|PRKCI|STK11	0	0	2	0	0	-3.41995	7.06931
1	-1.74662	GO:0098685	M1	1	0	GO Cellular Components	20	Schaffer collateral - CA1 synapse		-1.74662	2.94554	2.75701	714	12	101	5	4.9505	2.15843	2043|2045|2185|5584|5789	EPHA4|EPHA7|PTK2B|PRKCI|PTPRD	0	0	8	0	0	-2.69183	4.71287
1	-1.74662	GO:0042800	M1	1	0	GO Molecular Functions	21	histone H3K4 methyltransferase activity		-1.74662	2.94554	2.75701	714	12	101	5	4.9505	2.15843	8085|9739|9757|58508|84193	KMT2D|SETD1A|KMT2B|KMT2C|SETD3	0	0	18	0	0	-2.1416	4.0396
1	-1.70585	GO:0046883	M1	1	0	GO Biological Processes	19	regulation of hormone secretion	19_GO:0051179 localization	-1.70585	2.35644	2.55928	714	21	101	7	6.93069	2.52715	134|2044|3091|3667|5573|8398|8660	ADORA1|EPHA5|HIF1A|IRS1|PRKAR1A|PLA2G6|IRS2	0	0	1	0	0	-3.65292	5.30198
1	-1.69848	GO:0010563	M1	1	0	GO Biological Processes	19	negative regulation of phosphorus metabolic process	19_GO:0048519 negative regulation of biological process	-1.69848	1.66337	2.33274	714	68	101	16	15.8416	3.63318	142|324|867|1399|1981|4916|5573|5621|5771|6653|7157|8651|8660|9759|11122|25793	PARP1|APC|CBL|CRKL|EIF4G1|NTRK3|PRKAR1A|PRNP|PTPN2|SORL1|TP53|SOCS1|IRS2|HDAC4|PTPRT|FBXO7	0	0	32	1	1	-1.69848	1.66337
1	-1.69848	GO:0045936	M1	1	0	GO Biological Processes	19	negative regulation of phosphate metabolic process	19_GO:0048519 negative regulation of biological process	-1.69848	1.66337	2.33274	714	68	101	16	15.8416	3.63318	142|324|867|1399|1981|4916|5573|5621|5771|6653|7157|8651|8660|9759|11122|25793	PARP1|APC|CBL|CRKL|EIF4G1|NTRK3|PRKAR1A|PRNP|PTPN2|SORL1|TP53|SOCS1|IRS2|HDAC4|PTPRT|FBXO7	0	0	32	0	0	-1.69848	1.66337
1	-1.69075	GO:0070201	M1	1	0	GO Biological Processes	19	regulation of establishment of protein localization	19_GO:0051179 localization	-1.69075	1.73632	2.3507	714	57	101	14	13.8614	3.43828	975|2044|2064|3091|3667|5573|5621|6653|7468|8314|8398|8660|23400|65018	CD81|EPHA5|ERBB2|HIF1A|IRS1|PRKAR1A|PRNP|SORL1|NSD2|BAP1|PLA2G6|IRS2|ATP13A2|PINK1	0	0	1	0	0	-3.65292	5.30198
1	-1.69075	GO:0051960	M1	1	0	GO Biological Processes	19	regulation of nervous system development	19_GO:0032502 developmental process	-1.69075	1.73632	2.3507	714	57	101	14	13.8614	3.43828	1523|2043|2045|2047|2475|3091|3845|4916|5584|5789|6653|6794|7157|23013	CUX1|EPHA4|EPHA7|EPHB1|MTOR|HIF1A|KRAS|NTRK3|PRKCI|PTPRD|SORL1|STK11|TP53|SPEN	0	0	12	0	0	-2.55931	7.06931
1	-1.68499	GO:0051222	M1	1	0	GO Biological Processes	19	positive regulation of protein transport	19_GO:0051179 localization	-1.68499	1.89664	2.39872	714	41	101	11	10.8911	3.09981	975|2064|3091|5573|5621|6653|8314|8398|8660|23400|65018	CD81|ERBB2|HIF1A|PRKAR1A|PRNP|SORL1|BAP1|PLA2G6|IRS2|ATP13A2|PINK1	0	0	1	0	0	-3.65292	5.30198
1	-1.68499	GO:1904951	M1	1	0	GO Biological Processes	19	positive regulation of establishment of protein localization	19_GO:0051179 localization	-1.68499	1.89664	2.39872	714	41	101	11	10.8911	3.09981	975|2064|3091|5573|5621|6653|8314|8398|8660|23400|65018	CD81|ERBB2|HIF1A|PRKAR1A|PRNP|SORL1|BAP1|PLA2G6|IRS2|ATP13A2|PINK1	0	0	1	0	0	-3.65292	5.30198
1	-1.68499	GO:0009416	M1	1	0	GO Biological Processes	19	response to light stimulus	19_GO:0050896 response to stimulus	-1.68499	1.89664	2.39872	714	41	101	11	10.8911	3.09981	142|1387|1956|2072|3091|3845|6794|7054|7157|10347|123041	PARP1|CREBBP|EGFR|ERCC4|HIF1A|KRAS|STK11|TH|TP53|ABCA7|SLC24A4	0	0	33	1	1	-1.68499	2.35644
1	-1.67885	GO:0061629	M1	1	0	GO Molecular Functions	21	RNA polymerase II-specific DNA-binding transcription factor binding		-1.67885	1.62403	2.29989	714	74	101	17	16.8317	3.72291	142|1387|1399|1788|3091|5771|6777|7157|8289|9612|9739|9759|9968|11122|23013|84193|171023	PARP1|CREBBP|CRKL|DNMT3A|HIF1A|PTPN2|STAT5B|TP53|ARID1A|NCOR2|SETD1A|HDAC4|MED12|PTPRT|SPEN|SETD3|ASXL1	0	0	19	0	0	-2.13454	2.16007
1	-1.67128	GO:0007409	M1	1	0	GO Biological Processes	19	axonogenesis	19_GO:0032502 developmental process	-1.67128	1.9637	2.40687	714	36	101	10	9.90099	2.97193	2043|2044|2045|2047|2064|4854|5727|6654|6794|8929	EPHA4|EPHA5|EPHA7|EPHB1|ERBB2|NOTCH3|PTCH1|SOS1|STK11|PHOX2B	0	0	8	0	0	-2.69183	4.71287
1	-1.65376	GO:0042059	M1	1	0	GO Biological Processes	19	negative regulation of epidermal growth factor receptor signaling pathway	19_GO:0023052 signaling	-1.65376	4.24158	2.95049	714	5	101	3	2.9703	1.68924	867|1956|5771	CBL|EGFR|PTPN2	0	0	3	0	0	-3.06608	5.30198
1	-1.65376	GO:1901185	M1	1	0	GO Biological Processes	19	negative regulation of ERBB signaling pathway	19_GO:0023052 signaling	-1.65376	4.24158	2.95049	714	5	101	3	2.9703	1.68924	867|1956|5771	CBL|EGFR|PTPN2	0	0	3	0	0	-3.06608	5.30198
1	-1.65376	GO:0038128	M1	1	0	GO Biological Processes	19	ERBB2 signaling pathway	19_GO:0023052 signaling	-1.65376	4.24158	2.95049	714	5	101	3	2.9703	1.68924	1956|2064|2066	EGFR|ERBB2|ERBB4	0	0	6	0	0	-2.96645	5.30198
1	-1.65376	GO:0071470	M1	1	0	GO Biological Processes	19	cellular response to osmotic stress	19_GO:0050896 response to stimulus	-1.65376	4.24158	2.95049	714	5	101	3	2.9703	1.68924	1654|2475|57521	DDX3X|MTOR|RPTOR	0	0	11	0	0	-2.62791	7.06931
1	-1.65376	GO:0060571	M1	1	0	GO Biological Processes	19	morphogenesis of an epithelial fold	19_GO:0032502 developmental process	-1.65376	4.24158	2.95049	714	5	101	3	2.9703	1.68924	1956|3091|8626	EGFR|HIF1A|TP63	0	0	30	0	0	-1.77462	4.24158
1	-1.65376	GO:0042461	M1	1	0	GO Biological Processes	19	photoreceptor cell development	19_GO:0032502 developmental process	-1.65376	4.24158	2.95049	714	5	101	3	2.9703	1.68924	639|5584|7054	PRDM1|PRKCI|TH	0	0	35	1	1	-1.65376	4.24158
1	-1.65376	GO:0042462	M1	1	0	GO Biological Processes	19	eye photoreceptor cell development	19_GO:0032502 developmental process	-1.65376	4.24158	2.95049	714	5	101	3	2.9703	1.68924	639|5584|7054	PRDM1|PRKCI|TH	0	0	35	0	0	-1.65376	4.24158
1	-1.65376	GO:0033081	M1	1	0	GO Biological Processes	19	regulation of T cell differentiation in thymus	19_GO:0002376 immune system process	-1.65376	4.24158	2.95049	714	5	101	3	2.9703	1.68924	2064|5771|6654	ERBB2|PTPN2|SOS1	0	0	36	1	1	-1.65376	4.24158
1	-1.65376	GO:0046627	M1	1	0	GO Biological Processes	19	negative regulation of insulin receptor signaling pathway	19_GO:0023052 signaling	-1.65376	4.24158	2.95049	714	5	101	3	2.9703	1.68924	3667|5771|8651	IRS1|PTPN2|SOCS1	0	0	36	0	0	-1.65376	4.24158
1	-1.65376	GO:1900077	M1	1	0	GO Biological Processes	19	negative regulation of cellular response to insulin stimulus	19_GO:0048519 negative regulation of biological process	-1.65376	4.24158	2.95049	714	5	101	3	2.9703	1.68924	3667|5771|8651	IRS1|PTPN2|SOCS1	0	0	36	0	0	-1.65376	4.24158
1	-1.65376	R-HSA-1250347	M1	1	0	Reactome Gene Sets	6	SHC1 events in ERBB4 signaling		-1.65376	4.24158	2.95049	714	5	101	3	2.9703	1.68924	2066|3845|6654	ERBB4|KRAS|SOS1	0	0	3	0	0	-3.06608	5.30198
1	-1.65376	R-HSA-179812	M1	1	0	Reactome Gene Sets	6	GRB2 events in EGFR signaling		-1.65376	4.24158	2.95049	714	5	101	3	2.9703	1.68924	1956|3845|6654	EGFR|KRAS|SOS1	0	0	3	0	0	-3.06608	5.30198
1	-1.65376	R-HSA-180336	M1	1	0	Reactome Gene Sets	6	SHC1 events in EGFR signaling		-1.65376	4.24158	2.95049	714	5	101	3	2.9703	1.68924	1956|3845|6654	EGFR|KRAS|SOS1	0	0	3	0	0	-3.06608	5.30198
1	-1.65376	R-HSA-2179392	M1	1	0	Reactome Gene Sets	6	EGFR Transactivation by Gastrin		-1.65376	4.24158	2.95049	714	5	101	3	2.9703	1.68924	1956|3845|6654	EGFR|KRAS|SOS1	0	0	3	0	0	-3.06608	5.30198
1	-1.65376	R-HSA-9034864	M1	1	0	Reactome Gene Sets	6	Activated NTRK3 signals through RAS		-1.65376	4.24158	2.95049	714	5	101	3	2.9703	1.68924	3845|4916|6654	KRAS|NTRK3|SOS1	0	0	3	0	0	-3.06608	5.30198
1	-1.65376	R-HSA-9634285	M1	1	0	Reactome Gene Sets	6	Constitutive Signaling by Overexpressed ERBB2		-1.65376	4.24158	2.95049	714	5	101	3	2.9703	1.68924	2064|3845|6654	ERBB2|KRAS|SOS1	0	0	3	0	0	-3.06608	5.30198
1	-1.65376	R-HSA-6785631	M1	1	0	Reactome Gene Sets	6	ERBB2 Regulates Cell Motility		-1.65376	4.24158	2.95049	714	5	101	3	2.9703	1.68924	1956|2064|2066	EGFR|ERBB2|ERBB4	0	0	6	0	0	-2.96645	5.30198
1	-1.65376	R-HSA-4839735	M1	1	0	Reactome Gene Sets	6	Signaling by AXIN mutants		-1.65376	4.24158	2.95049	714	5	101	3	2.9703	1.68924	324|8312|139285	APC|AXIN1|AMER1	0	0	34	1	1	-1.65376	4.24158
1	-1.65376	R-HSA-4839744	M1	1	0	Reactome Gene Sets	6	Signaling by APC mutants		-1.65376	4.24158	2.95049	714	5	101	3	2.9703	1.68924	324|8312|139285	APC|AXIN1|AMER1	0	0	34	0	0	-1.65376	4.24158
1	-1.65376	R-HSA-4839748	M1	1	0	Reactome Gene Sets	6	Signaling by AMER1 mutants		-1.65376	4.24158	2.95049	714	5	101	3	2.9703	1.68924	324|8312|139285	APC|AXIN1|AMER1	0	0	34	0	0	-1.65376	4.24158
1	-1.65376	R-HSA-5467337	M1	1	0	Reactome Gene Sets	6	APC truncation mutants have impaired AXIN binding		-1.65376	4.24158	2.95049	714	5	101	3	2.9703	1.68924	324|8312|139285	APC|AXIN1|AMER1	0	0	34	0	0	-1.65376	4.24158
1	-1.65376	R-HSA-5467340	M1	1	0	Reactome Gene Sets	6	AXIN missense mutants destabilize the destruction complex		-1.65376	4.24158	2.95049	714	5	101	3	2.9703	1.68924	324|8312|139285	APC|AXIN1|AMER1	0	0	34	0	0	-1.65376	4.24158
1	-1.65376	R-HSA-5467348	M1	1	0	Reactome Gene Sets	6	Truncations of AMER1 destabilize the destruction complex		-1.65376	4.24158	2.95049	714	5	101	3	2.9703	1.68924	324|8312|139285	APC|AXIN1|AMER1	0	0	34	0	0	-1.65376	4.24158
1	-1.6385	GO:0038127	M1	1	0	GO Biological Processes	19	ERBB signaling pathway	19_GO:0023052 signaling	-1.6385	2.49505	2.53069	714	17	101	6	5.94059	2.3521	867|1956|2064|2066|2185|6654	CBL|EGFR|ERBB2|ERBB4|PTK2B|SOS1	0	0	3	0	0	-3.06608	5.30198
1	-1.6385	GO:0051963	M1	1	0	GO Biological Processes	19	regulation of synapse assembly	19_GO:0032502 developmental process	-1.6385	2.49505	2.53069	714	17	101	6	5.94059	2.3521	1981|2045|2047|2185|4916|5789	EIF4G1|EPHA7|EPHB1|PTK2B|NTRK3|PTPRD	0	0	8	0	0	-2.69183	4.71287
1	-1.6385	GO:1903578	M1	1	0	GO Biological Processes	19	regulation of ATP metabolic process	19_GO:0008152 metabolic process	-1.6385	2.49505	2.53069	714	17	101	6	5.94059	2.3521	142|2475|3091|9759|57521|65018	PARP1|MTOR|HIF1A|HDAC4|RPTOR|PINK1	0	0	11	0	0	-2.62791	7.06931
1	-1.63144	GO:0036293	M1	1	0	GO Biological Processes	19	response to decreased oxygen levels	19_GO:0050896 response to stimulus	-1.63144	1.80493	2.3159	714	47	101	12	11.8812	3.21961	134|867|1387|1788|2185|2475|3091|7015|7054|7157|57521|65018	ADORA1|CBL|CREBBP|DNMT3A|PTK2B|MTOR|HIF1A|TERT|TH|TP53|RPTOR|PINK1	0	0	4	0	0	-3.04232	5.30198
1	-1.63144	GO:0043025	M1	1	0	GO Cellular Components	20	neuronal cell body		-1.63144	1.80493	2.3159	714	47	101	12	11.8812	3.21961	134|1639|2043|2044|2045|2185|6653|6654|7054|23400|57521|79890	ADORA1|DCTN1|EPHA4|EPHA5|EPHA7|PTK2B|SORL1|SOS1|TH|ATP13A2|RPTOR|RIN3	0	0	28	0	0	-1.9019	1.83278
1	-1.62193	GO:1901214	M1	1	0	GO Biological Processes	19	regulation of neuron death	19_GO:0050789 regulation of biological process	-1.62193	1.60238	2.23678	714	75	101	17	16.8317	3.72291	134|142|867|1981|2045|2047|2185|3091|3845|5584|5621|6653|7015|7157|23400|25793|65018	ADORA1|PARP1|CBL|EIF4G1|EPHA7|EPHB1|PTK2B|HIF1A|KRAS|PRKCI|PRNP|SORL1|TERT|TP53|ATP13A2|FBXO7|PINK1	0	0	4	0	0	-3.04232	5.30198
1	-1.62193	GO:1901652	M1	1	0	GO Biological Processes	19	response to peptide	19_GO:0050896 response to stimulus	-1.62193	1.60238	2.23678	714	75	101	17	16.8317	3.72291	142|324|2043|2475|3667|5166|5584|5621|5771|6654|6777|6794|7054|7157|7253|8660|123041	PARP1|APC|EPHA4|MTOR|IRS1|PDK4|PRKCI|PRNP|PTPN2|SOS1|STAT5B|STK11|TH|TP53|TSHR|IRS2|SLC24A4	0	0	14	0	0	-2.49761	2.74917
1	-1.59221	GO:0002039	M1	1	0	GO Molecular Functions	21	p53 binding		-1.59221	2.24932	2.4144	714	22	101	7	6.93069	2.52715	1387|3091|4916|6794|7157|8312|8626	CREBBP|HIF1A|NTRK3|STK11|TP53|AXIN1|TP63	0	0	21	0	0	-2.00464	5.30198
1	-1.58838	GO:0018205	M1	1	0	GO Biological Processes	19	peptidyl-lysine modification	19_GO:0008152 metabolic process	-1.58838	1.91062	2.30739	714	37	101	10	9.90099	2.97193	1387|3662|7468|8085|9739|9757|9759|29072|58508|84193	CREBBP|IRF4|NSD2|KMT2D|SETD1A|KMT2B|HDAC4|SETD2|KMT2C|SETD3	0	0	18	0	0	-2.1416	4.0396
1	-1.58668	GO:1990778	M1	1	0	GO Biological Processes	19	protein localization to cell periphery	19_GO:0051179 localization	-1.58668	2.71896	2.5372	714	13	101	5	4.9505	2.15843	975|2064|2066|5727|6653	CD81|ERBB2|ERBB4|PTCH1|SORL1	0	0	6	0	0	-2.96645	5.30198
1	-1.58668	GO:0050773	M1	1	0	GO Biological Processes	19	regulation of dendrite development	19_GO:0032502 developmental process	-1.58668	2.71896	2.5372	714	13	101	5	4.9505	2.15843	1399|1523|2043|5789|6794	CRKL|CUX1|EPHA4|PTPRD|STK11	0	0	12	0	0	-2.55931	7.06931
1	-1.58668	GO:0030971	M1	1	0	GO Molecular Functions	21	receptor tyrosine kinase binding		-1.58668	2.71896	2.5372	714	13	101	5	4.9505	2.15843	867|3667|5771|7157|8660	CBL|IRS1|PTPN2|TP53|IRS2	0	0	14	0	0	-2.49761	2.74917
1	-1.57678	GO:0019209	M1	1	0	GO Molecular Functions	21	kinase activator activity		-1.57678	1.98824	2.32018	714	32	101	9	8.91089	2.83487	1654|1956|2066|3845|6654|6794|8660|10892|57521	DDX3X|EGFR|ERBB4|KRAS|SOS1|STK11|IRS2|MALT1|RPTOR	0	0	3	0	0	-3.06608	5.30198
1	-1.57595	GO:0043467	M1	1	0	GO Biological Processes	19	regulation of generation of precursor metabolites and energy	19_GO:0008152 metabolic process	-1.57595	2.09461	2.352	714	27	101	8	7.92079	2.68723	2475|3091|3667|7157|8660|9759|57521|65018	MTOR|HIF1A|IRS1|TP53|IRS2|HDAC4|RPTOR|PINK1	0	0	11	0	0	-2.62791	7.06931
1	-1.56872	GO:0050795	M1	1	0	GO Biological Processes	19	regulation of behavior	19_GO:0032501 multicellular organismal process	-1.56872	3.14191	2.62303	714	9	101	4	3.9604	1.94059	134|142|2475|123041	ADORA1|PARP1|MTOR|SLC24A4	0	0	24	0	0	-2.00464	5.30198
1	-1.56872	GO:0032412	M1	1	0	GO Biological Processes	19	regulation of monoatomic ion transmembrane transporter activity	19_GO:0051179 localization	-1.56872	3.14191	2.62303	714	9	101	4	3.9604	1.94059	2185|5621|8398|65018	PTK2B|PRNP|PLA2G6|PINK1	0	0	25	0	0	-2.00464	5.30198
1	-1.56872	GO:1904893	M1	1	0	GO Biological Processes	19	negative regulation of receptor signaling pathway via STAT	19_GO:0023052 signaling	-1.56872	3.14191	2.62303	714	9	101	4	3.9604	1.94059	5771|5789|8651|11122	PTPN2|PTPRD|SOCS1|PTPRT	0	0	36	0	0	-1.65376	4.24158
1	-1.56872	GO:1990089	M1	1	0	GO Biological Processes	19	response to nerve growth factor	19_GO:0050896 response to stimulus	-1.56872	3.14191	2.62303	714	9	101	4	3.9604	1.94059	142|867|4916|11021	PARP1|CBL|NTRK3|RAB35	0	0	37	1	1	-1.56872	3.14191
1	-1.56872	GO:1990090	M1	1	0	GO Biological Processes	19	cellular response to nerve growth factor stimulus	19_GO:0050896 response to stimulus	-1.56872	3.14191	2.62303	714	9	101	4	3.9604	1.94059	142|867|4916|11021	PARP1|CBL|NTRK3|RAB35	0	0	37	0	0	-1.56872	3.14191
1	-1.56872	R-HSA-1236382	M1	1	0	Reactome Gene Sets	6	Constitutive Signaling by Ligand-Responsive EGFR Cancer Variants		-1.56872	3.14191	2.62303	714	9	101	4	3.9604	1.94059	867|1956|3845|6654	CBL|EGFR|KRAS|SOS1	0	0	3	0	0	-3.06608	5.30198
1	-1.56872	R-HSA-1643713	M1	1	0	Reactome Gene Sets	6	Signaling by EGFR in Cancer		-1.56872	3.14191	2.62303	714	9	101	4	3.9604	1.94059	867|1956|3845|6654	CBL|EGFR|KRAS|SOS1	0	0	3	0	0	-3.06608	5.30198
1	-1.56872	R-HSA-5637810	M1	1	0	Reactome Gene Sets	6	Constitutive Signaling by EGFRvIII		-1.56872	3.14191	2.62303	714	9	101	4	3.9604	1.94059	867|1956|3845|6654	CBL|EGFR|KRAS|SOS1	0	0	3	0	0	-3.06608	5.30198
1	-1.56872	R-HSA-5637812	M1	1	0	Reactome Gene Sets	6	Signaling by EGFRvIII in Cancer		-1.56872	3.14191	2.62303	714	9	101	4	3.9604	1.94059	867|1956|3845|6654	CBL|EGFR|KRAS|SOS1	0	0	3	0	0	-3.06608	5.30198
1	-1.56872	R-HSA-5637815	M1	1	0	Reactome Gene Sets	6	Signaling by Ligand-Responsive EGFR Variants in Cancer		-1.56872	3.14191	2.62303	714	9	101	4	3.9604	1.94059	867|1956|3845|6654	CBL|EGFR|KRAS|SOS1	0	0	3	0	0	-3.06608	5.30198
1	-1.56872	R-HSA-9665348	M1	1	0	Reactome Gene Sets	6	Signaling by ERBB2 ECD mutants		-1.56872	3.14191	2.62303	714	9	101	4	3.9604	1.94059	1956|2064|3845|6654	EGFR|ERBB2|KRAS|SOS1	0	0	3	0	0	-3.06608	5.30198
1	-1.56872	R-HSA-9027284	M1	1	0	Reactome Gene Sets	6	Erythropoietin activates RAS		-1.56872	3.14191	2.62303	714	9	101	4	3.9604	1.94059	1399|3845|6654|8660	CRKL|KRAS|SOS1|IRS2	0	0	15	0	0	-2.37807	5.30198
1	-1.55077	GO:0007420	M1	1	0	GO Biological Processes	19	brain development	19_GO:0032502 developmental process	-1.55077	1.52633	2.13888	714	88	101	19	18.8119	3.88868	1021|1399|1956|2044|2045|2047|2066|3091|3845|4854|5727|6654|7054|7157|8660|8929|9612|9739|29072	CDK6|CRKL|EGFR|EPHA5|EPHA7|EPHB1|ERBB4|HIF1A|KRAS|NOTCH3|PTCH1|SOS1|TH|TP53|IRS2|PHOX2B|NCOR2|SETD1A|SETD2	0	0	38	1	1	-1.55077	1.52633
1	-1.51428	GO:0071482	M1	1	0	GO Biological Processes	19	cellular response to light stimulus	19_GO:0050896 response to stimulus	-1.51428	2.35644	2.36432	714	18	101	6	5.94059	2.3521	142|1387|2072|6794|7157|123041	PARP1|CREBBP|ERCC4|STK11|TP53|SLC24A4	0	0	33	0	0	-1.68499	2.35644
1	-1.51428	GO:1903322	M1	1	0	GO Biological Processes	19	positive regulation of protein modification by small protein conjugation or removal	19_GO:0048518 positive regulation of biological process	-1.51428	2.35644	2.36432	714	18	101	6	5.94059	2.3521	1654|8312|9759|10892|65018|139285	DDX3X|AXIN1|HDAC4|MALT1|PINK1|AMER1	0	0	34	0	0	-1.65376	4.24158
1	-1.51428	GO:0016363	M1	1	0	GO Cellular Components	20	nuclear matrix		-1.51428	2.35644	2.36432	714	18	101	6	5.94059	2.3521	862|1788|3181|7157|9612|55193	RUNX1T1|DNMT3A|HNRNPA2B1|TP53|NCOR2|PBRM1	0	0	39	1	1	-1.51428	2.35644
1	-1.51428	hsa00310	M1	1	0	KEGG Pathway	24	Lysine degradation		-1.51428	2.35644	2.36432	714	18	101	6	5.94059	2.3521	7468|8085|9739|9757|29072|58508	NSD2|KMT2D|SETD1A|KMT2B|SETD2|KMT2C	0	0	18	0	0	-2.1416	4.0396
1	-1.50965	GO:2000045	M1	1	0	GO Biological Processes	19	regulation of G1/S transition of mitotic cell cycle	19_GO:0050789 regulation of biological process	-1.50965	1.86034	2.21088	714	38	101	10	9.90099	2.97193	324|1654|1956|1981|7015|7157|8289|25793|55193|57521	APC|DDX3X|EGFR|EIF4G1|TERT|TP53|ARID1A|FBXO7|PBRM1|RPTOR	0	0	26	0	0	-1.92962	3.53465
1	-1.49204	GO:0008168	M1	1	0	GO Molecular Functions	21	methyltransferase activity		-1.49204	1.92799	2.21413	714	33	101	9	8.91089	2.83487	639|1788|7468|8085|9739|9757|29072|58508|84193	PRDM1|DNMT3A|NSD2|KMT2D|SETD1A|KMT2B|SETD2|KMT2C|SETD3	0	0	18	0	0	-2.1416	4.0396
1	-1.49204	GO:0016741	M1	1	0	GO Molecular Functions	21	transferase activity, transferring one-carbon groups		-1.49204	1.92799	2.21413	714	33	101	9	8.91089	2.83487	639|1788|7468|8085|9739|9757|29072|58508|84193	PRDM1|DNMT3A|NSD2|KMT2D|SETD1A|KMT2B|SETD2|KMT2C|SETD3	0	0	18	0	0	-2.1416	4.0396
1	-1.49204	R-HSA-199991	M1	1	0	Reactome Gene Sets	6	Membrane Trafficking		-1.49204	1.92799	2.21413	714	33	101	9	8.91089	2.83487	867|1523|1639|1956|8398|11021|23682|29978|79890	CBL|CUX1|DCTN1|EGFR|PLA2G6|RAB35|RAB38|UBQLN2|RIN3	0	0	23	0	0	-2.00464	5.30198
1	-1.48718	GO:0050708	M1	1	0	GO Biological Processes	19	regulation of protein secretion	19_GO:0051179 localization	-1.48718	2.15153	2.27706	714	23	101	7	6.93069	2.52715	2044|3091|3667|5573|8398|8660|23400	EPHA5|HIF1A|IRS1|PRKAR1A|PLA2G6|IRS2|ATP13A2	0	0	1	0	0	-3.65292	5.30198
1	-1.48718	GO:0031253	M1	1	0	GO Cellular Components	20	cell projection membrane		-1.48718	2.15153	2.27706	714	23	101	7	6.93069	2.52715	134|324|1956|2064|5727|10347|11021	ADORA1|APC|EGFR|ERBB2|PTCH1|ABCA7|RAB35	0	0	6	0	0	-2.96645	5.30198
1	-1.48718	GO:0018024	M1	1	0	GO Molecular Functions	21	histone lysine N-methyltransferase activity		-1.48718	2.15153	2.27706	714	23	101	7	6.93069	2.52715	7468|8085|9739|9757|29072|58508|84193	NSD2|KMT2D|SETD1A|KMT2B|SETD2|KMT2C|SETD3	0	0	18	0	0	-2.1416	4.0396
1	-1.48718	GO:0140938	M1	1	0	GO Molecular Functions	21	histone H3 methyltransferase activity		-1.48718	2.15153	2.27706	714	23	101	7	6.93069	2.52715	7468|8085|9739|9757|29072|58508|84193	NSD2|KMT2D|SETD1A|KMT2B|SETD2|KMT2C|SETD3	0	0	18	0	0	-2.1416	4.0396
1	-1.46403	GO:0051223	M1	1	0	GO Biological Processes	19	regulation of protein transport	19_GO:0051179 localization	-1.46403	1.67093	2.10082	714	55	101	13	12.8713	3.3322	975|2044|2064|3091|3667|5573|5621|6653|8314|8398|8660|23400|65018	CD81|EPHA5|ERBB2|HIF1A|IRS1|PRKAR1A|PRNP|SORL1|BAP1|PLA2G6|IRS2|ATP13A2|PINK1	0	0	1	0	0	-3.65292	5.30198
1	-1.46229	GO:0001666	M1	1	0	GO Biological Processes	19	response to hypoxia	19_GO:0050896 response to stimulus	-1.46229	1.76733	2.1313	714	44	101	11	10.8911	3.09981	134|1387|1788|2185|2475|3091|7015|7054|7157|57521|65018	ADORA1|CREBBP|DNMT3A|PTK2B|MTOR|HIF1A|TERT|TH|TP53|RPTOR|PINK1	0	0	4	0	0	-3.04232	5.30198
1	-1.44553	GO:0007163	M1	1	0	GO Biological Processes	19	establishment or maintenance of cell polarity	19_GO:0009987 cellular process	-1.44553	2.52475	2.33717	714	14	101	5	4.9505	2.15843	1399|1639|2047|5584|6794	CRKL|DCTN1|EPHB1|PRKCI|STK11	0	0	2	0	0	-3.41995	7.06931
1	-1.44553	GO:0045620	M1	1	0	GO Biological Processes	19	negative regulation of lymphocyte differentiation	19_GO:0002376 immune system process	-1.44553	2.52475	2.33717	714	14	101	5	4.9505	2.15843	1840|2064|5771|8651|25793	DTX1|ERBB2|PTPN2|SOCS1|FBXO7	0	0	36	0	0	-1.65376	4.24158
1	-1.44553	GO:0031901	M1	1	0	GO Cellular Components	20	early endosome membrane		-1.44553	2.52475	2.33717	714	14	101	5	4.9505	2.15843	1956|2043|2047|6653|10347	EGFR|EPHA4|EPHB1|SORL1|ABCA7	0	0	22	0	0	-2.00464	5.30198
1	-1.44283	GO:0043434	M1	1	0	GO Biological Processes	19	response to peptide hormone	19_GO:0050896 response to stimulus	-1.44283	1.62246	2.06204	714	61	101	14	13.8614	3.43828	142|324|2475|3667|5166|5584|5771|6654|6777|6794|7054|7253|8660|123041	PARP1|APC|MTOR|IRS1|PDK4|PRKCI|PTPN2|SOS1|STAT5B|STK11|TH|TSHR|IRS2|SLC24A4	0	0	14	0	0	-2.49761	2.74917
1	-1.42828	GO:0034330	M1	1	0	GO Biological Processes	19	cell junction organization	19_GO:0009987 cellular process	-1.42828	1.69663	2.07196	714	50	101	12	11.8812	3.21961	324|1399|1639|2043|2047|2064|2066|2185|4916|5584|5621|5789	APC|CRKL|DCTN1|EPHA4|EPHB1|ERBB2|ERBB4|PTK2B|NTRK3|PRKCI|PRNP|PTPRD	0	0	8	0	0	-2.69183	4.71287
1	-1.42768	GO:0045860	M1	1	0	GO Biological Processes	19	positive regulation of protein kinase activity	19_GO:0048518 positive regulation of biological process	-1.42768	1.58268	2.03232	714	67	101	15	14.8515	3.53845	134|1654|1956|2043|2064|2185|2321|2475|4916|5621|6794|8312|10892|57521|65018	ADORA1|DDX3X|EGFR|EPHA4|ERBB2|PTK2B|FLT1|MTOR|NTRK3|PRNP|STK11|AXIN1|MALT1|RPTOR|PINK1	0	0	7	0	0	-2.79984	3.53465
1	-1.42768	GO:1902105	M1	1	0	GO Biological Processes	19	regulation of leukocyte differentiation	19_GO:0002376 immune system process	-1.42768	1.58268	2.03232	714	67	101	15	14.8515	3.53845	639|1021|1840|2064|2175|2475|3662|5771|6654|6777|8289|8651|10892|25793|55193	PRDM1|CDK6|DTX1|ERBB2|FANCA|MTOR|IRF4|PTPN2|SOS1|STAT5B|ARID1A|SOCS1|MALT1|FBXO7|PBRM1	0	0	17	0	0	-2.22148	2.12079
1	-1.42768	GO:0009314	M1	1	0	GO Biological Processes	19	response to radiation	19_GO:0050896 response to stimulus	-1.42768	1.58268	2.03232	714	67	101	15	14.8515	3.53845	142|639|867|1387|1788|1956|2072|3091|3845|6794|7054|7157|8493|10347|123041	PARP1|PRDM1|CBL|CREBBP|DNMT3A|EGFR|ERCC4|HIF1A|KRAS|STK11|TH|TP53|PPM1D|ABCA7|SLC24A4	0	0	33	0	0	-1.68499	2.35644
1	-1.412	GO:0050803	M1	1	0	GO Biological Processes	19	regulation of synapse structure or activity	19_GO:0065007 biological regulation	-1.412	1.87129	2.11165	714	34	101	9	8.91089	2.83487	1639|1981|2043|2045|2047|2185|4916|5621|5789	DCTN1|EIF4G1|EPHA4|EPHA7|EPHB1|PTK2B|NTRK3|PRNP|PTPRD	0	0	8	0	0	-2.69183	4.71287
1	-1.412	GO:0050807	M1	1	0	GO Biological Processes	19	regulation of synapse organization	19_GO:0050789 regulation of biological process	-1.412	1.87129	2.11165	714	34	101	9	8.91089	2.83487	1639|1981|2043|2045|2047|2185|4916|5621|5789	DCTN1|EIF4G1|EPHA4|EPHA7|EPHB1|PTK2B|NTRK3|PRNP|PTPRD	0	0	8	0	0	-2.69183	4.71287
1	-1.412	GO:0004714	M1	1	0	GO Molecular Functions	21	transmembrane receptor protein tyrosine kinase activity		-1.412	1.87129	2.11165	714	34	101	9	8.91089	2.83487	1956|2043|2044|2045|2047|2064|2066|2321|4916	EGFR|EPHA4|EPHA5|EPHA7|EPHB1|ERBB2|ERBB4|FLT1|NTRK3	0	0	8	0	0	-2.69183	4.71287
1	-1.41062	GO:1903706	M1	1	0	GO Biological Processes	19	regulation of hemopoiesis	19_GO:0002376 immune system process	-1.41062	1.52124	1.9927	714	79	101	17	16.8317	3.72291	639|1021|1840|2064|2175|2185|2475|3091|3662|5771|6654|6777|8289|8651|10892|25793|55193	PRDM1|CDK6|DTX1|ERBB2|FANCA|PTK2B|MTOR|HIF1A|IRF4|PTPN2|SOS1|STAT5B|ARID1A|SOCS1|MALT1|FBXO7|PBRM1	0	0	17	0	0	-2.22148	2.12079
1	-1.40119	GO:0010906	M1	1	0	GO Biological Processes	19	regulation of glucose metabolic process	19_GO:0008152 metabolic process	-1.40119	2.23241	2.20859	714	19	101	6	5.94059	2.3521	3667|5166|5771|6794|7157|8660	IRS1|PDK4|PTPN2|STK11|TP53|IRS2	0	0	14	0	0	-2.49761	2.74917
1	-1.40119	GO:1901992	M1	1	0	GO Biological Processes	19	positive regulation of mitotic cell cycle phase transition	19_GO:0048518 positive regulation of biological process	-1.40119	2.23241	2.20859	714	19	101	6	5.94059	2.3521	1654|1956|1981|7015|8929|57521	DDX3X|EGFR|EIF4G1|TERT|PHOX2B|RPTOR	0	0	26	0	0	-1.92962	3.53465
1	-1.40119	GO:0045471	M1	1	0	GO Biological Processes	19	response to ethanol	19_GO:0050896 response to stimulus	-1.40119	2.23241	2.20859	714	19	101	6	5.94059	2.3521	867|1788|1981|2185|4916|7054	CBL|DNMT3A|EIF4G1|PTK2B|NTRK3|TH	0	0	37	0	0	-1.56872	3.14191
1	-1.40119	GO:0030426	M1	1	0	GO Cellular Components	20	growth cone		-1.40119	2.23241	2.20859	714	19	101	6	5.94059	2.3521	867|2043|2185|5727|23064|65018	CBL|EPHA4|PTK2B|PTCH1|SETX|PINK1	0	0	16	0	0	-2.23533	2.23241
1	-1.40119	GO:0030427	M1	1	0	GO Cellular Components	20	site of polarized growth		-1.40119	2.23241	2.20859	714	19	101	6	5.94059	2.3521	867|2043|2185|5727|23064|65018	CBL|EPHA4|PTK2B|PTCH1|SETX|PINK1	0	0	16	0	0	-2.23533	2.23241
1	-1.40119	GO:0003729	M1	1	0	GO Molecular Functions	21	mRNA binding		-1.40119	2.23241	2.20859	714	19	101	6	5.94059	2.3521	1654|1981|3181|4440|7157|23013	DDX3X|EIF4G1|HNRNPA2B1|MSI1|TP53|SPEN	0	0	41	1	1	-1.40119	2.23241
1	-1.39945	M277	M1	1	0	Canonical Pathways	11	PID INTEGRIN A4B1 PATHWAY		-1.39945	3.53465	2.52902	714	6	101	3	2.9703	1.68924	975|2185|5573	CD81|PTK2B|PRKAR1A	0	0	43	1	1	-1.39945	3.53465
1	-1.39945	GO:0045980	M1	1	0	GO Biological Processes	19	negative regulation of nucleotide metabolic process	19_GO:0048519 negative regulation of biological process	-1.39945	3.53465	2.52902	714	6	101	3	2.9703	1.68924	142|7157|9759	PARP1|TP53|HDAC4	0	0	13	0	0	-2.55931	7.06931
1	-1.39945	GO:1900543	M1	1	0	GO Biological Processes	19	negative regulation of purine nucleotide metabolic process	19_GO:0048519 negative regulation of biological process	-1.39945	3.53465	2.52902	714	6	101	3	2.9703	1.68924	142|7157|9759	PARP1|TP53|HDAC4	0	0	13	0	0	-2.55931	7.06931
1	-1.39945	GO:0046320	M1	1	0	GO Biological Processes	19	regulation of fatty acid oxidation	19_GO:0008152 metabolic process	-1.39945	3.53465	2.52902	714	6	101	3	2.9703	1.68924	3667|5166|8660	IRS1|PDK4|IRS2	0	0	15	0	0	-2.37807	5.30198
1	-1.39945	GO:0044648	M1	1	0	GO Biological Processes	19	histone H3-K4 dimethylation	19_GO:0008152 metabolic process	-1.39945	3.53465	2.52902	714	6	101	3	2.9703	1.68924	8085|9739|9757	KMT2D|SETD1A|KMT2B	0	0	18	0	0	-2.1416	4.0396
1	-1.39945	GO:0021545	M1	1	0	GO Biological Processes	19	cranial nerve development	19_GO:0032502 developmental process	-1.39945	3.53465	2.52902	714	6	101	3	2.9703	1.68924	2047|8929|123041	EPHB1|PHOX2B|SLC24A4	0	0	22	0	0	-2.00464	5.30198
1	-1.39945	GO:0043266	M1	1	0	GO Biological Processes	19	regulation of potassium ion transport	19_GO:0051179 localization	-1.39945	3.53465	2.52902	714	6	101	3	2.9703	1.68924	134|2185|5621	ADORA1|PTK2B|PRNP	0	0	25	0	0	-2.00464	5.30198
1	-1.39945	GO:0010799	M1	1	0	GO Biological Processes	19	regulation of peptidyl-threonine phosphorylation	19_GO:0008152 metabolic process	-1.39945	3.53465	2.52902	714	6	101	3	2.9703	1.68924	1981|8312|57521	EIF4G1|AXIN1|RPTOR	0	0	26	0	0	-1.92962	3.53465
1	-1.39945	GO:0000422	M1	1	0	GO Biological Processes	19	autophagy of mitochondrion	19_GO:0008152 metabolic process	-1.39945	3.53465	2.52902	714	6	101	3	2.9703	1.68924	7157|25793|65018	TP53|FBXO7|PINK1	0	0	27	0	0	-1.92962	3.53465
1	-1.39945	GO:0061726	M1	1	0	GO Biological Processes	19	mitochondrion disassembly	19_GO:0009987 cellular process	-1.39945	3.53465	2.52902	714	6	101	3	2.9703	1.68924	7157|25793|65018	TP53|FBXO7|PINK1	0	0	27	0	0	-1.92962	3.53465
1	-1.39945	GO:0090200	M1	1	0	GO Biological Processes	19	positive regulation of release of cytochrome c from mitochondria	19_GO:0023052 signaling	-1.39945	3.53465	2.52902	714	6	101	3	2.9703	1.68924	7157|8398|65018	TP53|PLA2G6|PINK1	0	0	27	0	0	-1.92962	3.53465
1	-1.39945	GO:0061462	M1	1	0	GO Biological Processes	19	protein localization to lysosome	19_GO:0051179 localization	-1.39945	3.53465	2.52902	714	6	101	3	2.9703	1.68924	975|6653|23400	CD81|SORL1|ATP13A2	0	0	31	0	0	-1.77462	3.53465
1	-1.39945	GO:0098839	M1	1	0	GO Cellular Components	20	postsynaptic density membrane		-1.39945	3.53465	2.52902	714	6	101	3	2.9703	1.68924	2043|2045|2066	EPHA4|EPHA7|ERBB4	0	0	8	0	0	-2.69183	4.71287
1	-1.39945	GO:0099634	M1	1	0	GO Cellular Components	20	postsynaptic specialization membrane		-1.39945	3.53465	2.52902	714	6	101	3	2.9703	1.68924	2043|2045|2066	EPHA4|EPHA7|ERBB4	0	0	8	0	0	-2.69183	4.71287
1	-1.39945	GO:0005516	M1	1	0	GO Molecular Functions	21	calmodulin binding		-1.39945	3.53465	2.52902	714	6	101	3	2.9703	1.68924	6016|8398|123041	RIT1|PLA2G6|SLC24A4	0	0	42	1	1	-1.39945	3.53465
1	-1.39945	R-HSA-1963642	M1	1	0	Reactome Gene Sets	6	PI3K events in ERBB2 signaling		-1.39945	3.53465	2.52902	714	6	101	3	2.9703	1.68924	1956|2064|2066	EGFR|ERBB2|ERBB4	0	0	6	0	0	-2.96645	5.30198
1	-1.39945	R-HSA-166208	M1	1	0	Reactome Gene Sets	6	mTORC1-mediated signalling		-1.39945	3.53465	2.52902	714	6	101	3	2.9703	1.68924	1981|2475|57521	EIF4G1|MTOR|RPTOR	0	0	11	0	0	-2.62791	7.06931
1	-1.39945	R-HSA-3371571	M1	1	0	Reactome Gene Sets	6	HSF1-dependent transactivation		-1.39945	3.53465	2.52902	714	6	101	3	2.9703	1.68924	1387|2475|57521	CREBBP|MTOR|RPTOR	0	0	11	0	0	-2.62791	7.06931
1	-1.39945	R-HSA-74749	M1	1	0	Reactome Gene Sets	6	Signal attenuation		-1.39945	3.53465	2.52902	714	6	101	3	2.9703	1.68924	3667|6654|8660	IRS1|SOS1|IRS2	0	0	15	0	0	-2.37807	5.30198
1	-1.39945	R-HSA-196299	M1	1	0	Reactome Gene Sets	6	Beta-catenin phosphorylation cascade		-1.39945	3.53465	2.52902	714	6	101	3	2.9703	1.68924	324|8312|139285	APC|AXIN1|AMER1	0	0	34	0	0	-1.65376	4.24158
1	-1.39945	R-HSA-4641262	M1	1	0	Reactome Gene Sets	6	Disassembly of the destruction complex and recruitment of AXIN to the membrane		-1.39945	3.53465	2.52902	714	6	101	3	2.9703	1.68924	324|8312|139285	APC|AXIN1|AMER1	0	0	34	0	0	-1.65376	4.24158
1	-1.39945	R-HSA-4839743	M1	1	0	Reactome Gene Sets	6	Signaling by CTNNB1 phospho-site mutants		-1.39945	3.53465	2.52902	714	6	101	3	2.9703	1.68924	324|8312|139285	APC|AXIN1|AMER1	0	0	34	0	0	-1.65376	4.24158
1	-1.39945	R-HSA-5339716	M1	1	0	Reactome Gene Sets	6	Signaling by GSK3beta mutants		-1.39945	3.53465	2.52902	714	6	101	3	2.9703	1.68924	324|8312|139285	APC|AXIN1|AMER1	0	0	34	0	0	-1.65376	4.24158
1	-1.39945	R-HSA-5358747	M1	1	0	Reactome Gene Sets	6	CTNNB1 S33 mutants aren't phosphorylated		-1.39945	3.53465	2.52902	714	6	101	3	2.9703	1.68924	324|8312|139285	APC|AXIN1|AMER1	0	0	34	0	0	-1.65376	4.24158
1	-1.39945	R-HSA-5358749	M1	1	0	Reactome Gene Sets	6	CTNNB1 S37 mutants aren't phosphorylated		-1.39945	3.53465	2.52902	714	6	101	3	2.9703	1.68924	324|8312|139285	APC|AXIN1|AMER1	0	0	34	0	0	-1.65376	4.24158
1	-1.39945	R-HSA-5358751	M1	1	0	Reactome Gene Sets	6	CTNNB1 S45 mutants aren't phosphorylated		-1.39945	3.53465	2.52902	714	6	101	3	2.9703	1.68924	324|8312|139285	APC|AXIN1|AMER1	0	0	34	0	0	-1.65376	4.24158
1	-1.39945	R-HSA-5358752	M1	1	0	Reactome Gene Sets	6	CTNNB1 T41 mutants aren't phosphorylated		-1.39945	3.53465	2.52902	714	6	101	3	2.9703	1.68924	324|8312|139285	APC|AXIN1|AMER1	0	0	34	0	0	-1.65376	4.24158
1	-1.39599	GO:0045981	M1	1	0	GO Biological Processes	19	positive regulation of nucleotide metabolic process	19_GO:0048518 positive regulation of biological process	-1.39599	2.82772	2.36102	714	10	101	4	3.9604	1.94059	2475|3091|57521|65018	MTOR|HIF1A|RPTOR|PINK1	0	0	11	0	0	-2.62791	7.06931
1	-1.39599	GO:1900544	M1	1	0	GO Biological Processes	19	positive regulation of purine nucleotide metabolic process	19_GO:0048518 positive regulation of biological process	-1.39599	2.82772	2.36102	714	10	101	4	3.9604	1.94059	2475|3091|57521|65018	MTOR|HIF1A|RPTOR|PINK1	0	0	11	0	0	-2.62791	7.06931
1	-1.39599	GO:1903580	M1	1	0	GO Biological Processes	19	positive regulation of ATP metabolic process	19_GO:0048518 positive regulation of biological process	-1.39599	2.82772	2.36102	714	10	101	4	3.9604	1.94059	2475|3091|57521|65018	MTOR|HIF1A|RPTOR|PINK1	0	0	11	0	0	-2.62791	7.06931
1	-1.39599	GO:0032768	M1	1	0	GO Biological Processes	19	regulation of monooxygenase activity	19_GO:0065007 biological regulation	-1.39599	2.82772	2.36102	714	10	101	4	3.9604	1.94059	1956|2185|3091|7015	EGFR|PTK2B|HIF1A|TERT	0	0	30	0	0	-1.77462	4.24158
1	-1.39599	GO:0006605	M1	1	0	GO Biological Processes	19	protein targeting	19_GO:0051179 localization	-1.39599	2.82772	2.36102	714	10	101	4	3.9604	1.94059	134|5584|6653|25793	ADORA1|PRKCI|SORL1|FBXO7	0	0	31	0	0	-1.77462	3.53465
1	-1.39599	GO:0090150	M1	1	0	GO Biological Processes	19	establishment of protein localization to membrane	19_GO:0051179 localization	-1.39599	2.82772	2.36102	714	10	101	4	3.9604	1.94059	134|1956|5584|6653	ADORA1|EGFR|PRKCI|SORL1	0	0	31	0	0	-1.77462	3.53465
1	-1.39599	GO:0045581	M1	1	0	GO Biological Processes	19	negative regulation of T cell differentiation	19_GO:0002376 immune system process	-1.39599	2.82772	2.36102	714	10	101	4	3.9604	1.94059	1840|2064|5771|8651	DTX1|ERBB2|PTPN2|SOCS1	0	0	36	0	0	-1.65376	4.24158
1	-1.39599	GO:1900076	M1	1	0	GO Biological Processes	19	regulation of cellular response to insulin stimulus	19_GO:0050896 response to stimulus	-1.39599	2.82772	2.36102	714	10	101	4	3.9604	1.94059	3667|5771|6653|8651	IRS1|PTPN2|SORL1|SOCS1	0	0	36	0	0	-1.65376	4.24158
1	-1.39599	GO:0140296	M1	1	0	GO Molecular Functions	21	general transcription initiation factor binding		-1.39599	2.82772	2.36102	714	10	101	4	3.9604	1.94059	2072|2475|7157|57521	ERCC4|MTOR|TP53|RPTOR	0	0	11	0	0	-2.62791	7.06931
1	-1.39583	GO:0030295	M1	1	0	GO Molecular Functions	21	protein kinase activator activity		-1.39583	1.95015	2.11896	714	29	101	8	7.92079	2.68723	1654|1956|2066|3845|6654|6794|8660|57521	DDX3X|EGFR|ERBB4|KRAS|SOS1|STK11|IRS2|RPTOR	0	0	3	0	0	-3.06608	5.30198
1	-1.39583	GO:0008276	M1	1	0	GO Molecular Functions	21	protein methyltransferase activity		-1.39583	1.95015	2.11896	714	29	101	8	7.92079	2.68723	1788|7468|8085|9739|9757|29072|58508|84193	DNMT3A|NSD2|KMT2D|SETD1A|KMT2B|SETD2|KMT2C|SETD3	0	0	18	0	0	-2.1416	4.0396
1	-1.39583	GO:0008757	M1	1	0	GO Molecular Functions	21	S-adenosylmethionine-dependent methyltransferase activity		-1.39583	1.95015	2.11896	714	29	101	8	7.92079	2.68723	1788|7468|8085|9739|9757|29072|58508|84193	DNMT3A|NSD2|KMT2D|SETD1A|KMT2B|SETD2|KMT2C|SETD3	0	0	18	0	0	-2.1416	4.0396
1	-1.3899	GO:0016278	M1	1	0	GO Molecular Functions	21	lysine N-methyltransferase activity		-1.3899	2.06188	2.14651	714	24	101	7	6.93069	2.52715	7468|8085|9739|9757|29072|58508|84193	NSD2|KMT2D|SETD1A|KMT2B|SETD2|KMT2C|SETD3	0	0	18	0	0	-2.1416	4.0396
1	-1.3899	GO:0016279	M1	1	0	GO Molecular Functions	21	protein-lysine N-methyltransferase activity		-1.3899	2.06188	2.14651	714	24	101	7	6.93069	2.52715	7468|8085|9739|9757|29072|58508|84193	NSD2|KMT2D|SETD1A|KMT2B|SETD2|KMT2C|SETD3	0	0	18	0	0	-2.1416	4.0396
1	-1.36369	GO:0061564	M1	1	0	GO Biological Processes	19	axon development	19_GO:0032502 developmental process	-1.36369	1.76733	2.02608	714	40	101	10	9.90099	2.97193	2043|2044|2045|2047|2064|4854|5727|6654|6794|8929	EPHA4|EPHA5|EPHA7|EPHB1|ERBB2|NOTCH3|PTCH1|SOS1|STK11|PHOX2B	0	0	8	0	0	-2.69183	4.71287
1	-1.36369	GO:0003007	M1	1	0	GO Biological Processes	19	heart morphogenesis	19_GO:0032502 developmental process	-1.36369	1.76733	2.02608	714	40	101	10	9.90099	2.97193	324|1399|2475|3091|5727|6654|7054|7157|7468|171023	APC|CRKL|MTOR|HIF1A|PTCH1|SOS1|TH|TP53|NSD2|ASXL1	0	0	40	0	0	-1.48296	2.0198
1	-1.36369	GO:0098793	M1	1	0	GO Cellular Components	20	presynapse		-1.36369	1.76733	2.02608	714	40	101	10	9.90099	2.97193	134|2043|2064|2066|2185|5621|5789|7054|11021|29058	ADORA1|EPHA4|ERBB2|ERBB4|PTK2B|PRNP|PTPRD|TH|RAB35|TMEM230	0	0	20	0	0	-2.04153	1.95534
1	-1.33634	GO:0006479	M1	1	0	GO Biological Processes	19	protein methylation	19_GO:0008152 metabolic process	-1.33634	1.81782	2.01249	714	35	101	9	8.91089	2.83487	639|1788|7468|8085|9739|9757|29072|58508|84193	PRDM1|DNMT3A|NSD2|KMT2D|SETD1A|KMT2B|SETD2|KMT2C|SETD3	0	0	18	0	0	-2.1416	4.0396
1	-1.33634	GO:0008213	M1	1	0	GO Biological Processes	19	protein alkylation	19_GO:0008152 metabolic process	-1.33634	1.81782	2.01249	714	35	101	9	8.91089	2.83487	639|1788|7468|8085|9739|9757|29072|58508|84193	PRDM1|DNMT3A|NSD2|KMT2D|SETD1A|KMT2B|SETD2|KMT2C|SETD3	0	0	18	0	0	-2.1416	4.0396
1	-1.33634	R-HSA-5653656	M1	1	0	Reactome Gene Sets	6	Vesicle-mediated transport		-1.33634	1.81782	2.01249	714	35	101	9	8.91089	2.83487	867|1523|1639|1956|8398|11021|23682|29978|79890	CBL|CUX1|DCTN1|EGFR|PLA2G6|RAB35|RAB38|UBQLN2|RIN3	0	0	23	0	0	-2.00464	5.30198
1	-1.31998	GO:0043470	M1	1	0	GO Biological Processes	19	regulation of carbohydrate catabolic process	19_GO:0008152 metabolic process	-1.31998	2.35644	2.15368	714	15	101	5	4.9505	2.15843	2475|3091|7157|9759|57521	MTOR|HIF1A|TP53|HDAC4|RPTOR	0	0	11	0	0	-2.62791	7.06931
1	-1.31998	GO:0071230	M1	1	0	GO Biological Processes	19	cellular response to amino acid stimulus	19_GO:0050896 response to stimulus	-1.31998	2.35644	2.15368	714	15	101	5	4.9505	2.15843	1788|1956|2475|8651|57521	DNMT3A|EGFR|MTOR|SOCS1|RPTOR	0	0	11	0	0	-2.62791	7.06931
1	-1.31998	GO:1902808	M1	1	0	GO Biological Processes	19	positive regulation of cell cycle G1/S phase transition	19_GO:0048518 positive regulation of biological process	-1.31998	2.35644	2.15368	714	15	101	5	4.9505	2.15843	1654|1956|1981|7015|57521	DDX3X|EGFR|EIF4G1|TERT|RPTOR	0	0	26	0	0	-1.92962	3.53465
1	-1.31998	GO:0120162	M1	1	0	GO Biological Processes	19	positive regulation of cold-induced thermogenesis	19_GO:0042592 homeostatic process	-1.31998	2.35644	2.15368	714	15	101	5	4.9505	2.15843	324|3662|7253|8929|283455	APC|IRF4|TSHR|PHOX2B|KSR2	0	0	44	1	1	-1.31998	2.35644
1	-1.30634	GO:0070482	M1	1	0	GO Biological Processes	19	response to oxygen levels	19_GO:0050896 response to stimulus	-1.30634	1.63138	1.91795	714	52	101	12	11.8812	3.21961	134|867|1387|1788|2185|2475|3091|7015|7054|7157|57521|65018	ADORA1|CBL|CREBBP|DNMT3A|PTK2B|MTOR|HIF1A|TERT|TH|TP53|RPTOR|PINK1	0	0	4	0	0	-3.04232	5.30198
1	-1.30634	GO:0019207	M1	1	0	GO Molecular Functions	21	kinase regulator activity		-1.30634	1.63138	1.91795	714	52	101	12	11.8812	3.21961	324|1654|1956|2066|3845|5573|6654|6794|8651|8660|10892|57521	APC|DDX3X|EGFR|ERBB4|KRAS|PRKAR1A|SOS1|STK11|SOCS1|IRS2|MALT1|RPTOR	0	0	3	0	0	-3.06608	5.30198
