# Supplementary material for: A microglia clonal inflammatory disorder in Alzheimer’s Disease
Source: bioRxiv preprint, doi:10.1101/2024.01.25.577216, version 2 (2024-08-03)
Supplement: Supplemental Table 5 [file 577216_file06.xlsx]

## Sheet: Sheet1
CALLER	Patient_ID	Disease	Brain.region	CELL_POP	Hugo_Symbol	Chromosome	Start_Position	End_Position	HGVSc	HGVSp	HGVSp_Short	Strand	Variant_Classification	Variant_Type	Reference_Allele.x	Tumor_Seq_Allele1	Tumor_Seq_Allele2	dbSNP_RS	t_depth	t_ref_count	t_alt_count	t_var_freq	VAF%	Pannel	Age	Sex	Mb.seq	citations	CADD_Score	MSC.CADD_Score	MSC.CADD_Impact_Pred	SIFT	PolyPhen	Cosmic fathmm	ClinVar	mutation_effect.OncoKB	oncogenic.OncoKb	Pathogenic	ddPCR Blood/BM VAF% (mut counts/total counts)	ddPCR Pu.1 VAF% (mut counts/total counts)	ddPCR NeuN VAF% (mut counts/total counts)	ddPCR DN VAF% (mut counts/total counts)	Validated
MUTECT+SHEAR	Patient#1	HISTIO	CEREBELLUM (4)	PU1	BRAF	7	140453136	140453136	c.1799T>A	p.Val600Glu	p.V600E	+	Missense_Mutation	SNP	A	A	T	rs113488022	723	675	48	0.06639	6.639	HemePACT+BrainPACT	22	Male	3.44	25417114;20179705;23833300;26091043;26343582;12068308;30351999;25079552;28783719;19251651;15035987	32	19.02	high	deleterious(0)	probably_damaging(0.967)	pathogenic	pathogenic	Gain-of-function	Oncogenic	YES	0.05 (1/1995) 0 (0/5674) // 0 (0/2393) 0 (2/5752)	7.85 (684/8709)	0 (1/3128)	0 (0/3076)	YES
MUTECT+SHEAR	Patient#1	HISTIO	HIPPOCAMPUS	PU1	BRAF	7	140453136	140453136	c.1799T>A	p.Val600Glu	p.V600E	+	Missense_Mutation	SNP	A	A	T	rs113488022	415	327	88	0.212048	21.205	HemePACT	22	Male	2.88	25417114;20179705;23833300;26091043;26343582;12068308;30351999;25079552;28783719;19251651;15035987	32	19.02	high	deleterious(0)	probably_damaging(0.967)	pathogenic	pathogenic	Gain-of-function	Oncogenic	YES	0.05 (1/1995) 0 (0/5674) // 0 (0/2393) 0 (2/5752)	22.16 (592/2672)	0.03 (1/3156)	0 (0/3367)	YES
MUTECT+SHEAR	Patient#1	HISTIO	MEDULLA	PU1	BRAF	7	140453136	140453136	c.1799T>A	p.Val600Glu	p.V600E	+	Missense_Mutation	SNP	A	A	T	rs113488022	740	721	19	0.0256757	2.568	HemePACT	22	Male	2.88	25417114;20179705;23833300;26091043;26343582;12068308;30351999;25079552;28783719;19251651;15035987	32	19.02	high	deleterious(0)	probably_damaging(0.967)	pathogenic	pathogenic	Gain-of-function	Oncogenic	YES	0.05 (1/1995) 0 (0/5674) // 0 (0/2393) 0 (2/5752)	0.12 (1/830) / 0.35 (11/3126)	1 (0/349) / 0 (0/896	0 (0/2410) / 0 (0/3386)	YES
MUTECT	Patient#1	HISTIO	MIDBRAIN	PU1	BRAF	7	140453136	140453136	c.1799T>A	p.Val600Glu	p.V600E	+	Missense_Mutation	SNP	A	A	T	rs113488022	867	861	6	0.0339366	3.394	HemePACT	22	Male	2.88	NA	32	19.02	high	deleterious(0)	probably_damaging(0.967)	pathogenic	pathogenic	Gain-of-function	Oncogenic	YES	0.05 (1/1995) 0 (0/5674) // 0 (0/2393) 0 (2/5752)	0.28 (8/2872)	0 (0/642)	0 (0/4529)	YES
MUTECT+SHEAR	Patient#1	HISTIO	PONS	PU1	BRAF	7	140453136	140453136	c.1799T>A	p.Val600Glu	p.V600E	+	Missense_Mutation	SNP	A	A	T	rs113488022	644	618	25	0.0388199	3.882	HemePACT	22	Male	2.88	25417114;20179705;23833300;26091043;26343582;12068308;30351999;25079552;28783719;19251651;15035987	32	19.02	high	deleterious(0)	probably_damaging(0.967)	pathogenic	pathogenic	Gain-of-function	Oncogenic	YES	0.05 (1/1995) 0 (0/5674) // 0 (0/2393) 0 (2/5752)	8.25 (139/1682)	0 (0/1712)	0.25 (5/1972)	YES
MUTECT+SHEAR	Patient#2	HISTIO	CEREBELLUM	PU1	BRAF	7	140453136	140453136	c.1799T>A	p.Val600Glu	p.V600E	+	Missense_Mutation	SNP	A	A	T	rs113488022	563	548	14	0.0248668	2.487	HemePACT	26	Female	2.88	25417114;20179705;23833300;26091043;26343582;12068308;30351999;25079552;28783719;19251651;15035987	32	19.02	high	deleterious(0)	probably_damaging(0.967)	pathogenic	pathogenic	Gain-of-function	Oncogenic	YES	0 (0/8501) 0(0/6998)	2.5 (151/5902)	NA	0 (0/5359)	YES
MUTECT+SHEAR	Patient#3	HISTIO	FRONTAL_CORTEX	PU1	BRAF	7	140453136	140453136	c.1799T>A	p.Val600Glu	p.V600E	+	Missense_Mutation	SNP	A	A	T	rs113488022	805	787	16	0.0198758	1.988	HemePACT+BrainPACT	78	Male	3.44	25417114;20179705;23833300;26091043;26343582;12068308;30351999;25079552;28783719;19251651;15035987	32	19.02	high	deleterious(0)	probably_damaging(0.967)	pathogenic	pathogenic	Gain-of-function	Oncogenic	YES		2.18 (104/4775)	0 (0/2700)	0 (0 /5250)	YES
MUTECT+SHEAR	Patient#3	HISTIO	HIPPOCAMPUS	PU1	BRAF	7	140453136	140453136	c.1799T>A	p.Val600Glu	p.V600E	+	Missense_Mutation	SNP	A	A	T	rs113488022	616	582	32	0.0519481	5.195	HemePACT+BrainPACT	78	Male	3.44	25417114;20179705;23833300;26091043;26343582;12068308;30351999;25079552;28783719;19251651;15035987	32	19.02	high	deleterious(0)	probably_damaging(0.967)	pathogenic	pathogenic	Gain-of-function	Oncogenic	YES		4.38 (155/3539)	0 (2/2620)	0.12 (8/6596)	YES
MUTECT+SHEAR	Patient#3	HISTIO	CEREBELLUM	PU1	BRAF	7	140453136	140453136	c.1799T>A	p.Val600Glu	p.V600E	+	Missense_Mutation	SNP	A	A	T	rs113488022	358	316	42	0.117318	11.732	HemePACT+BrainPACT	78	Male	3.44	25417114;20179705;23833300;26091043;26343582;12068308;30351999;25079552;28783719;19251651;15035987	32	19.02	high	deleterious(0)	probably_damaging(0.967)	pathogenic	pathogenic	Gain-of-function	Oncogenic	YES		10.97 (238/2171)	(0/3156)	0 (0/3693)	YES
MUTECT+SHEAR	Patient#3	HISTIO	MEDULLA	PU1	BRAF	7	140453136	140453136	c.1799T>A	p.Val600Glu	p.V600E	+	Missense_Mutation	SNP	A	A	T	rs113488022	366	286	80	0.218579	21.858	HemePACT+BrainPACT	78	Male	3.44	25417114;20179705;23833300;26091043;26343582;12068308;30351999;25079552;28783719;19251651;15035987	32	19.02	high	deleterious(0)	probably_damaging(0.967)	pathogenic	pathogenic	Gain-of-function	Oncogenic	YES		27.9 (851/3051)	0.42 (10/2376)	0.20 (5/2676)	YES
MUTECT+SHEAR	Patient#3	HISTIO	PONS	PU1	BRAF	7	140453136	140453136	c.1799T>A	p.Val600Glu	p.V600E	+	Missense_Mutation	SNP	A	A	T	rs113488022	474	362	111	0.234177	23.418	HemePACT+BrainPACT	78	Male	3.44	25417114;20179705;23833300;26091043;26343582;12068308;30351999;25079552;28783719;19251651;15035987	32	19.02	high	deleterious(0)	probably_damaging(0.967)	pathogenic	pathogenic	Gain-of-function	Oncogenic	YES		27.33 (775/2836)	NA	0.5 (19/3819)	YES
MUTECT+SHEAR	Patient#3	HISTIO	MIDBRAIN	PU1	BRAF	7	140453136	140453136	c.1799T>A	p.Val600Glu	p.V600E	+	Missense_Mutation	SNP	A	A	T	rs113488022	628	515	113	0.179936	17.994	HemePACT+BrainPACT	78	Male	3.44	25417114;20179705;23833300;26091043;26343582;12068308;30351999;25079552;28783719;19251651;15035987	32	19.02	high	deleterious(0)	probably_damaging(0.967)	pathogenic	pathogenic	Gain-of-function	Oncogenic	YES		18.23 (789/4327) 26.32 (299/ 837)	0.2 (6/2906) 0.5 (13/ 2416)	(3/34388) 0.2 (8/2881)	YES
MUTECT+SHEAR	Patient#4	HISTIO	PONS	PU1	BRAF	7	140453136	140453136	c.1799T>A	p.Val600Glu	p.V600E	+	Missense_Mutation	SNP	A	A	T	rs113488022	481	420	61	0.126819	12.682	HemePACT	66	Male	2.88	25417114;20179705;23833300;26091043;26343582;12068308;30351999;25079552;28783719;19251651;15035987	32	19.02	high	deleterious(0)	probably_damaging(0.967)	pathogenic	pathogenic	Gain-of-function	Oncogenic	YES	0 (0/5279) 0 (0/3099)	14.48 (717/4949) 14.97 (477/3185)	0.28 (17/5994) 0.73 (18/2447)	0 (2/2934) 0 ( 2/ 3231)	YES
MUTECT	Patient#5	HISTIO	THORACIC SPINAL CORD	PU1	BRAF	7	140453136	140453136	c.1799T>A	p.Val600Glu	p.V600E	+	Missense_Mutation	SNP	A	A	T	rs113488022	508	504	4	0.0150754	1.508	HemePACT	78	Female	2.88	25417114;20179705;23833300;26091043;26343582;12068308;30351999;25079552;28783719;19251651;15035987	32	19.02	high	deleterious(0)	probably_damaging(0.967)	pathogenic	pathogenic	Gain-of-function	Oncogenic	YES	0.2 (6/3147)	1.62 (90/5567)	NA	0 (0/5006)	YES
MUTECT	Patient#5	HISTIO	LUMBAR SPINAL CORD	PU1	BRAF	7	140453136	140453136	c.1799T>A	p.Val600Glu	p.V600E	+	Missense_Mutation	SNP	A	A	T	rs113488022	386	382	4	0.0103627	1.03627	HemePACT	78	Female	2.88	25417114;20179705;23833300;26091043;26343582;12068308;30351999;25079552;28783719;19251651;15035987	32	19.02	high	deleterious(0)	probably_damaging(0.967)	pathogenic	pathogenic	Gain-of-function	Oncogenic	YES	0.2 (6/3147)	0.99 (59/5945)	0 (2/3375)	0 (0/4581)	YES
MUTECT+SHEAR	Patient#5	HISTIO	CERVICAL SPINAL CORD	PU1	BRAF	7	140453136	140453136	c.1799T>A	p.Val600Glu	p.V600E	+	Missense_Mutation	SNP	A	A	T	rs113488022	570	562	7	0.0122807	1.228	HemePACT	78	Female	2.88	25417114;20179705;23833300;26091043;26343582;12068308;30351999;25079552;28783719;19251651;15035987	32	19.02	high	deleterious(0)	probably_damaging(0.967)	pathogenic	pathogenic	Gain-of-function	Oncogenic	YES	0.2 (6/3147)	1.81 (86/4781)	0 (2/4982)	0 (2/3926)	YES
MUTECT+SHEAR	Patient#5	HISTIO	TEMPORAL_CORTEX	PU1	BRAF	7	140453136	140453136	c.1799T>A	p.Val600Glu	p.V600E	+	Missense_Mutation	SNP	A	A	T	rs113488022	597	588	9	0.0150754	1.508	HemePACT	78	Female	2.88	25417114;20179705;23833300;26091043;26343582;12068308;30351999;25079552;28783719;19251651;15035987	32	19.02	high	deleterious(0)	probably_damaging(0.967)	pathogenic	pathogenic	Gain-of-function	Oncogenic	YES	0.2 (6/3147)	1.15 (98/8543)	0 (0/11942)	0 (2/10543)	YES
MUTECT+SHEAR	Patient#5	HISTIO	CEREBELLUM	PU1	BRAF	7	140453136	140453136	c.1799T>A	p.Val600Glu	p.V600E	+	Missense_Mutation	SNP	A	A	T	rs113488022	743	731	12	0.0161507	1.615	HemePACT	78	Female	2.88	25417114;20179705;23833300;26091043;26343582;12068308;30351999;25079552;28783719;19251651;15035987	32	19.02	high	deleterious(0)	probably_damaging(0.967)	pathogenic	pathogenic	Gain-of-function	Oncogenic	YES	0.2 (6/3147)	1.8 (81/4506)	0 (1/6890)	0 (1/4785)	YES
MUTECT+SHEAR	Patient#5	HISTIO	HIPPOCAMPUS	PU1	BRAF	7	140453136	140453136	c.1799T>A	p.Val600Glu	p.V600E	+	Missense_Mutation	SNP	A	A	T	rs113488022	444	422	20	0.045045	4.505	HemePACT	78	Female	2.88	25417114;20179705;23833300;26091043;26343582;12068308;30351999;25079552;28783719;19251651;15035987	32	19.02	high	deleterious(0)	probably_damaging(0.967)	pathogenic	pathogenic	Gain-of-function	Oncogenic	YES	0.2 (6/3147)	7.09 (514/7247)	0 (0/5061)	0 (0/6455)	YES
MUTECT+SHEAR	Patient#5	HISTIO	PONS	PU1	BRAF	7	140453136	140453136	c.1799T>A	p.Val600Glu	p.V600E	+	Missense_Mutation	SNP	A	A	T	rs113488022	683	645	37	0.0541728	5.417	HemePACT	78	Female	2.88	25417114;20179705;23833300;26091043;26343582;12068308;30351999;25079552;28783719;19251651;15035987	32	19.02	high	deleterious(0)	probably_damaging(0.967)	pathogenic	pathogenic	Gain-of-function	Oncogenic	YES	0.2 (6/3147)	5.81 (340/5849)	0 (3/4404)	0 (0/4229)	YES
MUTECT+SHEAR	Patient#5	HISTIO	MIDBRAIN	PU1	BRAF	7	140453136	140453136	c.1799T>A	p.Val600Glu	p.V600E	+	Missense_Mutation	SNP	A	A	T	rs113488022	401	343	58	0.144638	14.464	HemePACT	78	Female	2.88	25417114;20179705;23833300;26091043;26343582;12068308;30351999;25079552;28783719;19251651;15035987	32	19.02	high	deleterious(0)	probably_damaging(0.967)	pathogenic	pathogenic	Gain-of-function	Oncogenic	YES	0.2 (6/3147)	13.96 (697/4993) 7.3 (138/1894)	0.23 (15/6444) 0 ( 0/1349)	0 (2/4723) 0 (1/2583)	YES
MUTECT+SHEAR	Patient#5	HISTIO	MEDULLA	PU1	BRAF	7	140453136	140453136	c.1799T>A	p.Val600Glu	p.V600E	+	Missense_Mutation	SNP	A	A	T	rs113488022	352	286	66	0.1875	18.75	HemePACT	78	Female	2.88	25417114;20179705;23833300;26091043;26343582;12068308;30351999;25079552;28783719;19251651;15035987	32	19.02	high	deleterious(0)	probably_damaging(0.967)	pathogenic	pathogenic	Gain-of-function	Oncogenic	YES	0.2 (6/3147)	17.92 (1007/5618) 7(125/ 1782)	0.8 (36/4480) 0(0/1238)	0 (2 /5151) 0 (1/ 2609)	YES
MUTECT	Patient#6	HISTIO	THORACIC SPINAL CORD	PU1	BRAF	7	140453136	140453136	c.1799T>A	p.Val600Glu	p.V600E	+	Missense_Mutation	SNP	A	A	T	rs113488022	497	491	6	0.0120724	1.207	HemePACT	61	Male	2.88	25417114;20179705;23833300;26091043;26343582;12068308;30351999;25079552;28783719;19251651;15035987	32	19.02	high	deleterious(0)	probably_damaging(0.967)	pathogenic	pathogenic	Gain-of-function	Oncogenic	YES	0 (1/4730)	1.2 (54/4539)	NA	0 (0/5978)	YES
MUTECT+SHEAR	Patient#6	HISTIO	CEREBELLUM	PU1	BRAF	7	140453136	140453136	c.1799T>A	p.Val600Glu	p.V600E	+	Missense_Mutation	SNP	A	A	T	rs113488022	474	464	10	0.021097	2.11	HemePACT	61	Male	2.88	25417114;20179705;23833300;26091043;26343582;12068308;30351999;25079552;28783719;19251651;15035987	32	19.02	high	deleterious(0)	probably_damaging(0.967)	pathogenic	pathogenic	Gain-of-function	Oncogenic	YES	0(1/4730)	2.06 (134/6520)	0 (3/5106)	0 (3/6373)	YES
MUTECT	Patient#6	HISTIO	PONS	PU1	BRAF	7	140453136	140453136	c.1799T>A	p.Val600Glu	p.V600E	+	Missense_Mutation	SNP	A	A	T	rs113488022	629	607	22	0.0349762	3.498	HemePACT+BrainPACT	61	Male	3.44	25417114;20179705;23833300;26091043;26343582;12068308;30351999;25079552;28783719;19251651;15035987	32	19.02	high	deleterious(0)	probably_damaging(0.967)	pathogenic	pathogenic	Gain-of-function	Oncogenic	YES	0(1/4730)	5.24 (302/5767)	(0/4139)	0 (1/4647)	YES
