# Supplementary material for: A microglia clonal inflammatory disorder in Alzheimer’s Disease
Source: bioRxiv preprint, doi:10.1101/2024.01.25.577216, version 2 (2024-08-03)
Supplement: Supplemental Table 8 [file 577216_file09.xlsx]

## Sheet: DEGs CBL404CYvCC
		logFC	logCPM	F	PValue	FDR	threshold
ENSG00000229807	XIST	-15.738	7.67423	1263.66	2.65e-31	5.64e-27	DOWN
ENSG00000262406	MMP12	2.7924	10.2819	283.131	1.69e-19	1.8e-15	UP
ENSG00000270547	LINC01235	3.624	1.12637	271.294	3.52e-19	2.5e-15	UP
ENSG00000156504	FAM122B	1.13302	5.33507	258.799	7.87e-19	4.19e-15	NO
ENSG00000198034	RPS4X	0.946533	9.21305	253.632	1.11e-18	4.73e-15	NO
ENSG00000165704	HPRT1	1.07246	5.08384	246.945	1.75e-18	6.2e-15	NO
ENSG00000179909	ZNF154	-1.56385	2.59263	242.524	2.37e-18	7.21e-15	DOWN
ENSG00000101972	STAG2	1.19695	6.8285	213.207	2.05e-17	5.46e-14	NO
ENSG00000254122	PCDHGB7	-1.46175	3.23095	201.531	5.19e-17	1.23e-13	NO
ENSG00000129682	FGF13	1.66577	2.34712	184.815	2.14e-16	4.55e-13	UP
ENSG00000185904	LINC00839	-6.93745	-0.68689	157.587	2.73e-15	5.28e-12	DOWN
ENSG00000185222	TCEAL9	1.15391	5.86158	156.168	3.15e-15	5.59e-12	NO
ENSG00000148219	ASTN2	1.25626	3.26283	154.421	3.75e-15	5.62e-12	NO
ENSG00000196653	ZNF502	-7.62726	-0.223722	153.967	4.06e-15	5.62e-12	DOWN
ENSG00000165168	CYBB	1.3119	10.6741	152.905	4.38e-15	5.62e-12	NO
ENSG00000168477	TNXB	-3.78316	0.145425	152.511	4.56e-15	5.62e-12	DOWN
ENSG00000112769	LAMA4	2.57961	4.53722	152.796	4.59e-15	5.62e-12	UP
ENSG00000198429	ZNF69	-2.37807	0.885421	152.121	4.75e-15	5.62e-12	DOWN
ENSG00000072274	TFRC	1.08902	9.27713	149.956	5.94e-15	6.66e-12	NO
ENSG00000167880	EVPL	-4.05288	0.495534	149.117	6.48e-15	6.91e-12	DOWN
ENSG00000101888	NXT2	1.01288	4.29152	148.252	7.1e-15	7.2e-12	NO
ENSG00000108244	KRT23	-3.71432	0.0439212	147.47	7.71e-15	7.46e-12	DOWN
ENSG00000102078	SLC25A14	1.00455	3.0146	147.044	8.06e-15	7.47e-12	NO
ENSG00000122126	OCRL	1.00972	6.12314	144.496	1.06e-14	9.38e-12	NO
ENSG00000253873	PCDHGA11	-3.45962	2.01607	141.871	1.43e-14	1.22e-11	DOWN
ENSG00000143387	CTSK	1.86304	7.29632	136.911	2.42e-14	1.99e-11	UP
ENSG00000197249	SERPINA1	1.70049	9.0058	136.274	2.6e-14	2.05e-11	UP
ENSG00000101825	MXRA5	1.5928	7.63019	135.785	2.75e-14	2.09e-11	UP
ENSG00000196507	TCEAL3	0.637909	5.09071	134.579	3.15e-14	2.32e-11	NO
ENSG00000185869	ZNF829	-1.88296	0.652189	132.242	4.11e-14	2.92e-11	DOWN
ENSG00000101928	MOSPD1	1.22204	4.69655	131.908	4.28e-14	2.94e-11	NO
ENSG00000057252	SOAT1	0.601442	6.81243	129.164	5.88e-14	3.91e-11	NO
ENSG00000205542	TMSB4X	0.851453	12.0065	128.632	6.26e-14	4.04e-11	NO
ENSG00000100342	APOL1	1.13089	2.83045	127.287	7.33e-14	4.59e-11	NO
ENSG00000122121	XPNPEP2	2.76502	2.12265	124.652	1e-13	5.94e-11	UP
ENSG00000147206	NXF3	2.90245	2.71499	124.773	1.02e-13	5.94e-11	UP
ENSG00000167601	AXL	-1.09494	6.42034	124.433	1.03e-13	5.94e-11	NO
ENSG00000198453	ZNF568	-1.63315	1.43186	123.432	1.16e-13	6.52e-11	DOWN
ENSG00000123575	FAM199X	0.738254	5.94958	122.983	1.23e-13	6.71e-11	NO
ENSG00000249171	AC021192.1	2.29524	-1.12037	121.8	1.42e-13	7.56e-11	UP
ENSG00000102226	USP11	0.807584	6.64963	120.904	1.58e-13	8.23e-11	NO
ENSG00000112378	PERP	-1.39694	4.1785	119.307	1.93e-13	9.79e-11	NO
ENSG00000132185	FCRLA	2.52727	-0.791998	118.633	2.1e-13	1.04e-10	UP
ENSG00000156265	MAP3K7CL	-1.19492	3.14531	113.926	3.81e-13	1.85e-10	NO
ENSG00000131725	WDR44	0.928373	5.26489	112.6	4.53e-13	2.14e-10	NO
ENSG00000237181	AC147651.4	0.995618	3.31635	111.66	5.11e-13	2.37e-10	NO
ENSG00000270641	TSIX	-7.59168	-2.46162	120.965	9.36e-13	4.24e-10	DOWN
ENSG00000267364	AC022706.1	2.24278	-0.83589	106.124	1.07e-12	4.75e-10	UP
ENSG00000235750	KIAA0040	0.824806	2.55197	104.969	1.25e-12	5.34e-10	NO
ENSG00000130985	UBA1	0.481647	8.75938	104.962	1.25e-12	5.34e-10	NO
ENSG00000130208	APOC1	1.10022	7.83572	104.357	1.36e-12	5.69e-10	NO
ENSG00000169469	SPRR1B	-6.02803	-0.597692	100.815	2.29e-12	9.36e-10	DOWN
ENSG00000101846	STS	1.0042	5.4075	99.4983	2.69e-12	1.08e-09	NO
ENSG00000180287	PLD5	-2.73441	2.05742	99.1525	2.85e-12	1.12e-09	DOWN
ENSG00000002726	AOC1	2.83294	0.360854	98.9772	2.89e-12	1.12e-09	UP
ENSG00000163898	LIPH	-3.1136	0.280146	98.8205	2.96e-12	1.13e-09	DOWN
ENSG00000065978	YBX1	0.433749	9.95451	98.3869	3.15e-12	1.18e-09	NO
ENSG00000123131	PRDX4	0.831427	6.12508	97.6892	3.48e-12	1.28e-09	NO
ENSG00000223547	ZNF844	-1.99056	0.887536	97.2492	3.71e-12	1.34e-09	DOWN
ENSG00000101000	PROCR	1.08564	6.38822	96.1744	4.34e-12	1.54e-09	NO
ENSG00000118785	SPP1	1.181	15.4174	95.3385	4.9e-12	1.71e-09	NO
ENSG00000172893	DHCR7	-0.718083	4.55085	94.862	5.26e-12	1.81e-09	NO
ENSG00000069812	HES2	-2.85847	-0.633016	92.0644	7.97e-12	2.7e-09	DOWN
ENSG00000156313	RPGR	1.28667	4.0249	90.0284	1.09e-11	3.61e-09	NO
ENSG00000223573	TINCR	-2.60304	-0.240666	89.9076	1.11e-11	3.63e-09	DOWN
ENSG00000183019	MCEMP1	2.20909	1.1668	89.4425	1.19e-11	3.75e-09	UP
ENSG00000232677	LINC00665	-1.5205	2.32657	89.414	1.19e-11	3.75e-09	DOWN
ENSG00000102172	SMS	1.16126	8.48873	89.3278	1.21e-11	3.75e-09	NO
ENSG00000135929	CYP27A1	1.13425	6.51415	89.3016	1.21e-11	3.75e-09	NO
ENSG00000268518	AC020909.2	1.20297	1.66088	88.8364	1.3e-11	3.97e-09	NO
ENSG00000250120	PCDHA10	-1.05926	2.52096	88.5652	1.36e-11	4.08e-09	NO
ENSG00000136155	SCEL	-4.07312	0.975449	88.38	1.43e-11	4.24e-09	DOWN
ENSG00000269834	ZNF528-AS1	-5.36025	-0.259413	87.2935	1.71e-11	4.99e-09	DOWN
ENSG00000005302	MSL3	0.758323	5.40017	85.9749	2.04e-11	5.87e-09	NO
ENSG00000178222	RNF212	-2.26678	-0.346486	85.1854	2.31e-11	6.5e-09	DOWN
ENSG00000104888	SLC17A7	1.09747	0.406571	85.1597	2.32e-11	6.5e-09	NO
ENSG00000050767	COL23A1	-2.12012	3.64649	84.7432	2.53e-11	7.01e-09	DOWN
ENSG00000196611	MMP1	2.15365	5.56664	83.6614	3.05e-11	8.33e-09	UP
ENSG00000197647	ZNF433	-2.08348	-0.138862	82.48	3.57e-11	9.62e-09	DOWN
ENSG00000002586	CD99	0.486148	8.09844	81.3988	4.26e-11	1.13e-08	NO
ENSG00000215146	BX322639.1	-1.72695	0.778129	81.0437	4.51e-11	1.19e-08	DOWN
ENSG00000188227	ZNF793	-1.43726	1.02086	80.203	5.19e-11	1.34e-08	NO
ENSG00000171124	FUT3	-3.44394	0.0834574	80.2117	5.21e-11	1.34e-08	DOWN
ENSG00000170498	KISS1	-4.14557	1.22278	80.0167	5.53e-11	1.4e-08	DOWN
ENSG00000112902	SEMA5A	-1.14747	5.03472	78.4426	6.96e-11	1.74e-08	NO
ENSG00000158747	NBL1	-0.891815	4.33332	78.2759	7.15e-11	1.76e-08	NO
ENSG00000081665	ZNF506	-1.61982	2.60196	78.2653	7.17e-11	1.76e-08	DOWN
ENSG00000154262	ABCA6	2.46459	-0.338197	77.8612	7.67e-11	1.83e-08	UP
ENSG00000065923	SLC9A7	1.16258	6.35492	77.8445	7.7e-11	1.83e-08	NO
ENSG00000141934	PLPP2	-1.86519	1.14627	77.8035	7.75e-11	1.83e-08	DOWN
ENSG00000233452	STXBP5-AS1	1.6382	1.91165	77.1714	8.63e-11	2.02e-08	UP
ENSG00000186847	KRT14	-4.33382	-0.678442	76.6539	9.59e-11	2.22e-08	DOWN
ENSG00000106537	TSPAN13	-1.14939	3.22839	76.4365	9.78e-11	2.24e-08	NO
ENSG00000101901	ALG13	0.80754	5.20275	76.3203	9.98e-11	2.26e-08	NO
ENSG00000137699	TRIM29	-3.99409	1.14204	76.383	1.02e-10	2.28e-08	DOWN
ENSG00000157680	DGKI	1.08621	3.06047	75.9341	1.07e-10	2.37e-08	NO
ENSG00000090382	LYZ	1.07132	8.59586	75.636	1.12e-10	2.46e-08	NO
ENSG00000254838	GVINP1	1.77872	0.760036	75.5231	1.14e-10	2.49e-08	UP
ENSG00000102054	RBBP7	0.608753	7.11009	74.3896	1.39e-10	3e-08	NO
ENSG00000222032	AC112721.2	2.16139	-0.0690199	73.8273	1.54e-10	3.27e-08	UP
ENSG00000102218	RP2	1.15152	6.64469	73.0049	1.78e-10	3.72e-08	NO
ENSG00000130962	PRRG1	1.07188	4.34339	72.9824	1.78e-10	3.72e-08	NO
ENSG00000118113	MMP8	2.19456	0.841641	72.7081	1.87e-10	3.87e-08	UP
ENSG00000105854	PON2	-0.58339	5.23526	72.5141	1.94e-10	3.97e-08	NO
ENSG00000165675	ENOX2	1.18596	4.279	72.3655	1.99e-10	4.04e-08	NO
ENSG00000011198	ABHD5	0.55605	4.28091	71.9717	2.13e-10	4.29e-08	NO
ENSG00000140297	GCNT3	2.72844	0.431565	71.8249	2.19e-10	4.35e-08	UP
ENSG00000157600	TMEM164	0.957024	6.63664	71.7852	2.21e-10	4.35e-08	NO
ENSG00000123728	RAP2C	0.832468	6.70514	71.6113	2.27e-10	4.44e-08	NO
ENSG00000166770	ZNF667-AS1	-2.48148	1.44855	71.5803	2.29e-10	4.44e-08	DOWN
ENSG00000070526	ST6GALNAC1	-4.0925	-1.01612	71.4738	2.35e-10	4.51e-08	DOWN
ENSG00000013588	GPRC5A	-2.02984	4.95691	71.4032	2.43e-10	4.63e-08	DOWN
ENSG00000184916	JAG2	-1.77729	0.458761	70.8048	2.63e-10	4.96e-08	DOWN
ENSG00000167749	KLK4	2.90481	-1.74034	70.6595	2.7e-10	5.04e-08	UP
ENSG00000163435	ELF3	-2.64908	-0.469028	70.3511	2.85e-10	5.28e-08	DOWN
ENSG00000165359	INTS6L	0.719815	4.16054	70.3094	2.87e-10	5.28e-08	NO
ENSG00000198814	GK	1.20604	7.10076	70.1787	2.94e-10	5.36e-08	NO
ENSG00000172478	C2orf54	-4.30553	-2.28574	69.1164	3.57e-10	6.45e-08	DOWN
ENSG00000165140	FBP1	1.66184	6.51956	68.8008	3.86e-10	6.89e-08	UP
ENSG00000102144	PGK1	0.660828	9.44899	68.6661	3.88e-10	6.89e-08	NO
ENSG00000234284	ZNF879	-1.38817	0.49344	68.5118	3.99e-10	7.03e-08	NO
ENSG00000187653	TMSB4XP8	0.706868	4.83229	68.2351	4.2e-10	7.34e-08	NO
ENSG00000171951	SCG2	-1.01914	2.12978	68.0507	4.35e-10	7.53e-08	NO
ENSG00000119411	BSPRY	-2.03841	-1.4758	67.7848	4.57e-10	7.84e-08	DOWN
ENSG00000167555	ZNF528	-4.27986	2.02893	67.8556	4.63e-10	7.9e-08	DOWN
ENSG00000182287	AP1S2	0.943503	6.92088	67.6511	4.68e-10	7.91e-08	NO
ENSG00000156709	AIFM1	1.02046	5.73887	67.5577	4.76e-10	7.99e-08	NO
ENSG00000183943	PRKX	0.48385	5.8736	67.4762	4.83e-10	8.05e-08	NO
ENSG00000087128	TMPRSS11E	-3.04264	-0.981386	67.2886	5.01e-10	8.27e-08	DOWN
ENSG00000101974	ATP11C	1.05725	5.68715	67.1267	5.16e-10	8.46e-08	NO
ENSG00000163359	COL6A3	1.66063	8.98666	67.0083	5.36e-10	8.72e-08	UP
ENSG00000185052	SLC24A3	1.6365	-0.466909	66.8411	5.44e-10	8.78e-08	UP
ENSG00000156697	UTP14A	0.875214	4.934	66.7693	5.52e-10	8.84e-08	NO
ENSG00000068831	RASGRP2	-2.05924	-1.96724	66.6964	5.59e-10	8.89e-08	DOWN
ENSG00000196263	ZNF471	-2.05216	1.12958	66.3806	5.93e-10	9.36e-08	DOWN
ENSG00000214541	RPS4XP3	0.971621	0.0332299	65.5148	6.99e-10	1.09e-07	NO
ENSG00000246100	LINC00900	1.43621	2.77464	65.0107	7.69e-10	1.2e-07	NO
ENSG00000178773	CPNE7	-1.81881	0.292033	64.5459	8.4e-10	1.3e-07	DOWN
ENSG00000177932	ZNF354C	-2.04416	1.57999	64.4903	8.49e-10	1.3e-07	DOWN
ENSG00000239998	LILRA2	1.07339	2.3974	64.3721	8.68e-10	1.32e-07	NO
ENSG00000117586	TNFSF4	1.15255	3.03255	64.3024	8.8e-10	1.33e-07	NO
ENSG00000267254	AC020928.1	-2.74711	-1.50961	63.4291	1.04e-09	1.56e-07	DOWN
ENSG00000108691	CCL2	1.34175	10.9545	62.6597	1.21e-09	1.81e-07	NO
ENSG00000040731	CDH10	-1.43113	0.703624	62.2214	1.32e-09	1.95e-07	NO
ENSG00000221971	TTC4P1	-2.11415	-0.893856	61.5025	1.52e-09	2.23e-07	DOWN
ENSG00000174473	GALNTL6	-2.40579	-1.4155	60.4196	1.88e-09	2.74e-07	DOWN
ENSG00000162931	TRIM17	-2.17496	-1.47944	60.2449	1.95e-09	2.82e-07	DOWN
ENSG00000134824	FADS2	-0.900093	6.02046	60.1146	2e-09	2.88e-07	NO
ENSG00000130005	GAMT	-1.11594	2.76888	59.9785	2.05e-09	2.94e-07	NO
ENSG00000198885	ITPRIPL1	-0.898046	1.23133	59.9221	2.08e-09	2.94e-07	NO
ENSG00000189051	RNF222	-4.74219	-2.59363	59.9131	2.08e-09	2.94e-07	DOWN
ENSG00000198342	ZNF442	-1.6135	-0.727385	59.7601	2.15e-09	3e-07	DOWN
ENSG00000178078	STAP2	-1.33195	0.873811	59.7412	2.15e-09	3e-07	NO
ENSG00000167874	TMEM88	-1.98567	2.09991	59.561	2.24e-09	3.1e-07	DOWN
ENSG00000172572	PDE3A	1.99405	2.93086	59.4016	2.34e-09	3.22e-07	UP
ENSG00000046647	GEMIN8	0.616715	3.16321	58.9997	2.5e-09	3.41e-07	NO
ENSG00000155659	VSIG4	1.08167	9.94665	58.97	2.52e-09	3.41e-07	NO
ENSG00000149451	ADAM33	-1.81999	-0.771839	58.8856	2.56e-09	3.45e-07	DOWN
ENSG00000279668	AC024610.2	1.79522	-1.72576	58.8514	2.58e-09	3.45e-07	UP
ENSG00000230043	TMSB4XP6	0.792481	5.15999	58.6859	2.67e-09	3.55e-07	NO
ENSG00000166535	A2ML1	-3.38217	-0.267332	58.5182	2.79e-09	3.68e-07	DOWN
ENSG00000188706	ZDHHC9	0.714816	5.27614	58.4467	2.8e-09	3.68e-07	NO
ENSG00000127951	FGL2	1.85119	4.39237	58.4797	2.85e-09	3.72e-07	UP
ENSG00000130741	EIF2S3	0.65366	8.06438	58.0717	3.02e-09	3.92e-07	NO
ENSG00000101966	XIAP	1.16784	6.58752	58.034	3.04e-09	3.93e-07	NO
ENSG00000162722	TRIM58	-1.67479	3.13556	57.904	3.15e-09	4.05e-07	DOWN
ENSG00000135678	CPM	1.21255	7.24609	57.832	3.18e-09	4.05e-07	NO
ENSG00000166922	SCG5	1.66981	2.94495	57.752	3.23e-09	4.1e-07	UP
ENSG00000185418	TARSL2	-0.614829	3.61718	57.5678	3.35e-09	4.22e-07	NO
ENSG00000238243	OR2W3	-2.08145	-0.803534	57.5195	3.38e-09	4.24e-07	DOWN
ENSG00000160213	CSTB	0.886601	9.17303	57.4636	3.42e-09	4.26e-07	NO
ENSG00000102854	MSLN	-3.45806	-0.592991	57.45	3.47e-09	4.3e-07	DOWN
ENSG00000165175	MID1IP1	0.824145	4.70021	57.3347	3.51e-09	4.33e-07	NO
ENSG00000043039	BARX2	-2.9252	-1.76626	56.5793	4.11e-09	5.03e-07	DOWN
ENSG00000112414	ADGRG6	-1.56358	3.77188	56.5452	4.19e-09	5.1e-07	DOWN
ENSG00000135622	SEMA4F	-0.529505	3.19877	56.4112	4.25e-09	5.15e-07	NO
ENSG00000102359	SRPX2	0.944424	5.71509	56.272	4.38e-09	5.27e-07	NO
ENSG00000249307	LINC01088	-1.96924	0.79371	56.2055	4.44e-09	5.31e-07	DOWN
ENSG00000119673	ACOT2	0.763244	4.43554	56.1486	4.49e-09	5.35e-07	NO
ENSG00000106123	EPHB6	1.03349	2.03881	56.0083	4.63e-09	5.48e-07	NO
ENSG00000099284	H2AFY2	-0.957339	3.7631	55.9098	4.72e-09	5.56e-07	NO
ENSG00000222022	AC112721.1	1.86613	-0.496162	55.8713	4.76e-09	5.57e-07	UP
ENSG00000172322	CLEC12A	1.20727	5.0541	55.5819	5.06e-09	5.9e-07	NO
ENSG00000037965	HOXC8	-1.33317	2.53858	55.432	5.22e-09	6.04e-07	NO
ENSG00000198131	ZNF544	-0.58	3.64642	55.2929	5.37e-09	6.19e-07	NO
ENSG00000076344	RGS11	-2.07465	-1.95861	55.239	5.44e-09	6.23e-07	DOWN
ENSG00000203721	LINC00862	1.75322	0.369603	55.2018	5.48e-09	6.24e-07	UP
ENSG00000155066	PROM2	-2.22458	0.808738	54.9565	5.77e-09	6.52e-07	DOWN
ENSG00000171345	KRT19	-1.34829	6.29641	55.0094	5.78e-09	6.52e-07	NO
ENSG00000131724	IL13RA1	1.00218	8.29329	54.4528	6.42e-09	7.2e-07	NO
ENSG00000056277	ZNF280C	0.79398	2.51719	54.4133	6.47e-09	7.22e-07	NO
ENSG00000120306	CYSTM1	0.467481	5.82568	54.2943	6.64e-09	7.37e-07	NO
ENSG00000168824	NSG1	-1.51723	1.83328	53.9299	7.18e-09	7.92e-07	DOWN
ENSG00000204421	LY6G6C	-3.68504	-2.56766	53.7886	7.4e-09	8.12e-07	DOWN
ENSG00000240225	ZNF542P	-0.886302	3.65567	53.7291	7.49e-09	8.19e-07	NO
ENSG00000181433	SAGE1	4.38773	-3.27353	58.8473	7.71e-09	8.36e-07	UP
ENSG00000117472	TSPAN1	-2.78482	0.600363	53.6397	7.73e-09	8.36e-07	DOWN
ENSG00000115896	PLCL1	1.01524	3.22716	53.536	7.81e-09	8.4e-07	NO
ENSG00000185189	NRBP2	-0.525729	4.08	53.3352	8.15e-09	8.73e-07	NO
ENSG00000185761	ADAMTSL5	-0.958747	1.20815	53.2561	8.29e-09	8.81e-07	NO
ENSG00000129993	CBFA2T3	-2.03848	0.180286	53.2471	8.31e-09	8.81e-07	DOWN
ENSG00000163209	SPRR3	-4.55791	1.98983	53.142	8.68e-09	9.16e-07	DOWN
ENSG00000004776	HSPB6	-1.67423	2.61486	52.9815	8.81e-09	9.25e-07	DOWN
ENSG00000130595	TNNT3	-7.27524	-2.63311	56.8876	9.16e-09	9.57e-07	DOWN
ENSG00000102393	GLA	0.67971	6.85923	52.7345	9.28e-09	9.65e-07	NO
ENSG00000180964	TCEAL8	0.951759	5.74951	52.5372	9.69e-09	1e-06	NO
ENSG00000154065	ANKRD29	2.12513	0.725349	52.4612	9.85e-09	1.01e-06	UP
ENSG00000196793	ZNF239	-1.31075	0.528011	52.2884	1.02e-08	1.05e-06	NO
ENSG00000103569	AQP9	0.925882	8.67253	52.2757	1.03e-08	1.05e-06	NO
ENSG00000137673	MMP7	2.13253	5.47388	52.317	1.04e-08	1.05e-06	UP
ENSG00000075624	ACTB	0.477371	12.89	52.0814	1.07e-08	1.08e-06	NO
ENSG00000180543	TSPYL5	-0.94067	3.11906	51.9647	1.1e-08	1.1e-06	NO
ENSG00000165912	PACSIN3	-1.26277	1.93818	51.8366	1.13e-08	1.13e-06	NO
ENSG00000014257	ACPP	1.84954	1.44459	51.5292	1.21e-08	1.2e-06	UP
ENSG00000179913	B3GNT3	-3.36792	0.583254	51.5552	1.22e-08	1.21e-06	DOWN
ENSG00000186777	ZNF732	-2.5769	-1.24223	51.4426	1.23e-08	1.21e-06	DOWN
ENSG00000198046	ZNF667	-3.06065	0.57706	51.3096	1.29e-08	1.26e-06	DOWN
ENSG00000162623	TYW3	-0.690645	3.79118	51.234	1.29e-08	1.26e-06	NO
ENSG00000241886	AC112496.1	1.33128	1.5813	51.082	1.33e-08	1.3e-06	NO
ENSG00000088726	TMEM40	-3.43223	0.484649	50.9308	1.41e-08	1.36e-06	DOWN
ENSG00000135404	CD63	0.521143	9.88622	50.81	1.41e-08	1.36e-06	NO
ENSG00000121858	TNFSF10	1.50433	0.975459	50.8047	1.42e-08	1.36e-06	UP
ENSG00000166428	PLD4	-1.1508	1.37472	50.6444	1.47e-08	1.4e-06	NO
ENSG00000173391	OLR1	0.930106	8.45246	50.4902	1.52e-08	1.44e-06	NO
ENSG00000205476	CCDC85C	-1.4011	3.86625	50.5178	1.52e-08	1.44e-06	NO
ENSG00000231233	CFAP58-AS1	2.55689	-1.48524	50.4261	1.54e-08	1.45e-06	UP
ENSG00000111077	TNS2	0.872334	2.80128	50.3388	1.57e-08	1.47e-06	NO
ENSG00000134028	ADAMDEC1	-1.38304	4.80453	50.0728	1.69e-08	1.58e-06	NO
ENSG00000114993	RTKN	-1.0145	3.09577	49.9293	1.72e-08	1.6e-06	NO
ENSG00000147689	FAM83A	-3.53334	-0.835082	49.929	1.74e-08	1.61e-06	DOWN
ENSG00000218014	KRT19P1	-1.62148	-2.3292	49.8312	1.76e-08	1.62e-06	DOWN
ENSG00000029559	IBSP	3.78685	4.25822	49.4653	1.95e-08	1.79e-06	UP
ENSG00000136193	SCRN1	-0.553612	6.59378	49.1788	2.04e-08	1.86e-06	NO
ENSG00000170954	ZNF415	-0.976914	0.922206	49.0576	2.09e-08	1.91e-06	NO
ENSG00000188765	TMSB4XP2	0.740757	3.8774	48.9005	2.17e-08	1.97e-06	NO
ENSG00000186832	KRT16	-2.72661	-1.68825	48.8806	2.18e-08	1.97e-06	DOWN
ENSG00000247774	PCED1B-AS1	1.16006	3.21691	48.7803	2.23e-08	2e-06	NO
ENSG00000185499	MUC1	-1.16574	0.979771	48.678	2.28e-08	2.04e-06	NO
ENSG00000158488	CD1E	1.30277	1.35606	48.6616	2.29e-08	2.04e-06	NO
ENSG00000135919	SERPINE2	-1.55124	7.45886	48.6458	2.34e-08	2.08e-06	DOWN
ENSG00000130513	GDF15	1.58031	2.6054	48.543	2.35e-08	2.08e-06	UP
ENSG00000081041	CXCL2	1.30154	7.80345	48.3364	2.49e-08	2.2e-06	NO
ENSG00000065361	ERBB3	-2.75549	0.772578	47.9752	2.71e-08	2.37e-06	DOWN
ENSG00000129680	MAP7D3	0.913329	4.09074	47.8731	2.74e-08	2.39e-06	NO
ENSG00000236876	TMSB4XP1	0.812459	1.89693	47.6088	2.91e-08	2.52e-06	NO
ENSG00000131370	SH3BP5	0.685512	6.73595	47.6059	2.91e-08	2.52e-06	NO
ENSG00000163207	IVL	-3.39581	0.241686	47.4579	3.06e-08	2.64e-06	DOWN
ENSG00000112782	CLIC5	-3.23266	0.801091	47.4622	3.07e-08	2.64e-06	DOWN
ENSG00000188171	ZNF626	-1.21063	1.56375	47.2977	3.13e-08	2.68e-06	NO
ENSG00000144278	GALNT13	-1.5308	0.46481	47.2167	3.19e-08	2.71e-06	DOWN
ENSG00000101843	PSMD10	0.656744	5.77142	47.212	3.19e-08	2.71e-06	NO
ENSG00000187676	B3GLCT	0.414308	3.7649	47.161	3.23e-08	2.73e-06	NO
ENSG00000173156	RHOD	-1.77034	1.19754	47.146	3.24e-08	2.73e-06	DOWN
ENSG00000105612	DNASE2	0.731421	6.64159	46.8902	3.44e-08	2.88e-06	NO
ENSG00000182492	BGN	1.17425	4.41669	46.6553	3.63e-08	3.03e-06	NO
ENSG00000140749	IGSF6	1.09504	6.85468	46.6535	3.63e-08	3.03e-06	NO
ENSG00000226051	ZNF503-AS1	1.55102	0.579956	46.6241	3.65e-08	3.03e-06	UP
ENSG00000104723	TUSC3	-0.712822	4.40502	46.4103	3.84e-08	3.17e-06	NO
ENSG00000198542	ITGBL1	2.47963	0.928566	46.4207	3.87e-08	3.19e-06	UP
ENSG00000179542	SLITRK4	-8.38863	0.413369	46.3977	3.92e-08	3.22e-06	DOWN
ENSG00000215788	TNFRSF25	-1.46867	0.61064	46.2441	3.99e-08	3.26e-06	NO
ENSG00000110031	LPXN	1.00136	6.10438	46.1966	4.04e-08	3.28e-06	NO
ENSG00000149972	CNTN5	-2.0191	-0.249309	46.1456	4.09e-08	3.3e-06	DOWN
ENSG00000169750	RAC3	-1.80128	1.97201	46.1497	4.09e-08	3.3e-06	DOWN
ENSG00000125827	TMX4	0.440843	5.94171	46.1101	4.12e-08	3.3e-06	NO
ENSG00000242173	ARHGDIG	-3.14413	-2.34185	46.1094	4.12e-08	3.3e-06	DOWN
ENSG00000176658	MYO1D	0.746602	7.29403	46.0769	4.15e-08	3.31e-06	NO
ENSG00000005471	ABCB4	-1.60805	2.50701	46.0661	4.17e-08	3.31e-06	DOWN
ENSG00000178146	AL672207.1	1.34658	0.0907479	46.0402	4.19e-08	3.32e-06	NO
ENSG00000196268	ZNF493	-0.877475	1.09034	45.7327	4.5e-08	3.55e-06	NO
ENSG00000102802	MEDAG	1.41661	1.45465	45.701	4.53e-08	3.57e-06	NO
ENSG00000105352	CEACAM4	-1.65355	-0.129051	45.6728	4.56e-08	3.57e-06	DOWN
ENSG00000257838	AC106788.1	1.17723	0.877582	45.6597	4.58e-08	3.57e-06	NO
ENSG00000101311	FERMT1	-1.70269	2.76524	45.6752	4.61e-08	3.58e-06	DOWN
ENSG00000178035	IMPDH2	-0.381086	5.85986	45.5608	4.69e-08	3.63e-06	NO
ENSG00000160932	LY6E	-0.949681	4.7406	45.3702	4.9e-08	3.78e-06	NO
ENSG00000140287	HDC	4.67887	-1.37597	45.4114	4.93e-08	3.79e-06	UP
ENSG00000177599	ZNF491	-1.70696	-0.501489	45.3159	4.97e-08	3.81e-06	DOWN
ENSG00000102034	ELF4	0.971315	7.02474	45.1969	5.11e-08	3.9e-06	NO
ENSG00000179241	LDLRAD3	0.588337	4.85741	45.1804	5.13e-08	3.9e-06	NO
ENSG00000196724	ZNF418	-0.775095	1.17449	45.168	5.14e-08	3.9e-06	NO
ENSG00000177694	NAALADL2	-1.15737	0.482306	45.0823	5.25e-08	3.96e-06	NO
ENSG00000082438	COBLL1	-1.31032	3.43725	45.079	5.26e-08	3.96e-06	NO
ENSG00000204539	CDSN	-3.1577	-1.35021	45.03	5.34e-08	4e-06	DOWN
ENSG00000183691	NOG	-1.70367	0.24031	44.9833	5.37e-08	4.02e-06	DOWN
ENSG00000162882	HAAO	0.896638	2.86711	44.9324	5.44e-08	4.05e-06	NO
ENSG00000140465	CYP1A1	-3.33801	0.631073	44.9394	5.52e-08	4.1e-06	DOWN
ENSG00000111412	C12orf49	0.489361	6.82178	44.7893	5.63e-08	4.16e-06	NO
ENSG00000182612	TSPAN10	-1.11603	-0.0249793	44.7518	5.68e-08	4.18e-06	NO
ENSG00000121797	CCRL2	0.885872	7.01512	44.7469	5.68e-08	4.18e-06	NO
ENSG00000172465	TCEAL1	0.786255	3.72099	44.6691	5.79e-08	4.24e-06	NO
ENSG00000167767	KRT80	-1.51756	2.21285	44.3084	6.31e-08	4.6e-06	DOWN
ENSG00000185482	STAC3	0.952143	4.37303	44.2792	6.35e-08	4.62e-06	NO
ENSG00000223551	TMSB4XP4	0.705502	4.7038	44.1013	6.63e-08	4.81e-06	NO
ENSG00000272602	ZNF595	-0.600727	2.20647	44.0565	6.7e-08	4.84e-06	NO
ENSG00000109133	TMEM33	0.331846	6.05493	44.0307	6.74e-08	4.85e-06	NO
ENSG00000171401	KRT13	-5.15019	1.18855	43.9111	7.06e-08	5.06e-06	DOWN
ENSG00000141449	GREB1L	-1.86382	1.16663	43.5196	7.63e-08	5.45e-06	DOWN
ENSG00000069667	RORA	1.19105	1.94386	43.5083	7.65e-08	5.45e-06	NO
ENSG00000150054	MPP7	-1.05691	-0.0311518	43.472	7.71e-08	5.48e-06	NO
ENSG00000197757	HOXC6	-1.22615	1.56254	43.3141	8.01e-08	5.67e-06	NO
ENSG00000102181	CD99L2	0.897658	6.93592	43.2806	8.08e-08	5.7e-06	NO
ENSG00000166501	PRKCB	1.21331	3.6881	43.2581	8.12e-08	5.71e-06	NO
ENSG00000163751	CPA3	4.81912	0.311431	43.2939	8.19e-08	5.74e-06	UP
ENSG00000129757	CDKN1C	-1.07294	2.03196	43.1797	8.28e-08	5.78e-06	NO
ENSG00000133048	CHI3L1	1.39452	10.4212	43.0539	8.66e-08	6.03e-06	NO
ENSG00000186212	SOWAHB	-3.81256	-1.54336	42.7447	9.3e-08	6.45e-06	DOWN
ENSG00000155368	DBI	0.666781	7.34311	42.6464	9.43e-08	6.52e-06	NO
ENSG00000130700	GATA5	-4.22239	-2.55529	42.5517	9.65e-08	6.65e-06	DOWN
ENSG00000130150	MOSPD2	1.03724	4.94214	42.4913	9.79e-08	6.72e-06	NO
ENSG00000101916	TLR8	0.884434	7.28508	42.4839	9.81e-08	6.72e-06	NO
ENSG00000023902	PLEKHO1	0.552549	7.00229	42.4663	9.85e-08	6.73e-06	NO
ENSG00000126217	MCF2L	-1.91686	0.875524	42.4492	9.89e-08	6.74e-06	DOWN
ENSG00000185825	BCAP31	0.433214	8.2614	42.1884	1.05e-07	7.14e-06	NO
ENSG00000153292	ADGRF1	-3.62555	-1.78834	42.186	1.06e-07	7.14e-06	DOWN
ENSG00000132938	MTUS2	-2.03382	-2.44259	42.1247	1.07e-07	7.22e-06	DOWN
ENSG00000163734	CXCL3	1.17171	8.72868	42.011	1.11e-07	7.47e-06	NO
ENSG00000164120	HPGD	1.90884	0.230109	41.9235	1.13e-07	7.54e-06	UP
ENSG00000125675	GRIA3	1.63117	0.395751	41.8896	1.14e-07	7.58e-06	UP
ENSG00000174611	KY	2.62056	-0.627737	41.6786	1.2e-07	8e-06	UP
ENSG00000165685	TMEM52B	1.02531	3.62934	41.6458	1.21e-07	8e-06	NO
ENSG00000137460	FHDC1	-1.88767	-0.217849	41.618	1.21e-07	8.03e-06	DOWN
ENSG00000147676	MAL2	-3.26883	1.5915	41.6581	1.22e-07	8.04e-06	DOWN
ENSG00000267481	AC011477.2	-1.61204	-0.921079	41.591	1.22e-07	8.04e-06	DOWN
ENSG00000255298	OR8G5	2.82387	-0.59544	41.5226	1.25e-07	8.22e-06	UP
ENSG00000182985	CADM1	0.815059	6.93682	41.339	1.3e-07	8.5e-06	NO
ENSG00000123191	ATP7B	-1.18082	2.98931	41.3251	1.31e-07	8.51e-06	NO
ENSG00000154175	ABI3BP	3.03365	2.65028	41.3682	1.31e-07	8.52e-06	UP
ENSG00000179889	PDXDC1	0.336985	6.8096	41.2617	1.33e-07	8.55e-06	NO
ENSG00000124920	MYRF	-0.795564	5.1611	41.256	1.33e-07	8.55e-06	NO
ENSG00000166681	BEX3	0.579609	6.25741	41.247	1.33e-07	8.55e-06	NO
ENSG00000141293	SKAP1	2.80539	0.583578	41.3014	1.33e-07	8.55e-06	UP
ENSG00000167157	PRRX2	2.61118	-1.1588	41.2228	1.34e-07	8.57e-06	UP
ENSG00000092820	EZR	-0.636788	7.45943	41.1656	1.36e-07	8.66e-06	NO
ENSG00000130822	PNCK	2.08524	-2.2928	41.1283	1.37e-07	8.72e-06	UP
ENSG00000158014	SLC30A2	-2.08241	0.0672008	40.8868	1.46e-07	9.23e-06	DOWN
ENSG00000175318	GRAMD2A	-3.1232	-0.441157	40.8938	1.47e-07	9.29e-06	DOWN
ENSG00000107562	CXCL12	1.341	4.62776	40.7583	1.52e-07	9.57e-06	NO
ENSG00000124486	USP9X	0.690096	8.00388	40.5518	1.58e-07	9.95e-06	NO
ENSG00000203446	AC004988.1	1.16253	2.84878	40.3537	1.66e-07	1.04e-05	NO
ENSG00000184363	PKP3	-2.39838	0.580203	40.3744	1.67e-07	1.04e-05	DOWN
ENSG00000238164	TNFRSF14-AS1	1.11395	1.14204	40.3314	1.67e-07	1.04e-05	NO
ENSG00000158485	CD1B	1.48795	-1.14422	40.3221	1.68e-07	1.04e-05	NO
ENSG00000100412	ACO2	0.468306	7.41872	40.3179	1.68e-07	1.04e-05	NO
ENSG00000103067	ESRP2	-2.79094	-0.139582	40.3139	1.7e-07	1.05e-05	DOWN
ENSG00000198168	SVIP	-0.656887	2.37629	40.2351	1.71e-07	1.06e-05	NO
ENSG00000258791	LINC00520	1.68102	-0.435713	40.219	1.72e-07	1.06e-05	UP
ENSG00000172936	MYD88	0.534231	7.16571	40.1576	1.75e-07	1.07e-05	NO
ENSG00000278318	ZNF229	-2.47282	2.14081	40.2101	1.75e-07	1.07e-05	DOWN
ENSG00000253846	PCDHGA10	0.925277	4.85251	40.1133	1.77e-07	1.08e-05	NO
ENSG00000027075	PRKCH	0.878344	4.43335	40.0767	1.78e-07	1.08e-05	NO
ENSG00000162630	B3GALT2	-2.60087	-2.46268	40.017	1.81e-07	1.1e-05	DOWN
ENSG00000269190	FBXO17	-0.548821	2.60509	39.9916	1.82e-07	1.1e-05	NO
ENSG00000087245	MMP2	0.731343	6.78822	39.9363	1.85e-07	1.11e-05	NO
ENSG00000168938	PPIC	0.531026	4.24065	39.8954	1.87e-07	1.12e-05	NO
ENSG00000127954	STEAP4	-2.41036	-1.76662	39.8702	1.88e-07	1.13e-05	DOWN
ENSG00000163041	H3F3A	0.291196	6.56871	39.8562	1.89e-07	1.13e-05	NO
ENSG00000140105	WARS	0.566906	7.64002	39.7118	1.96e-07	1.16e-05	NO
ENSG00000269743	SLC25A53	0.665665	2.05396	39.696	1.96e-07	1.17e-05	NO
ENSG00000114790	ARHGEF26	-1.11936	1.49897	39.6691	1.98e-07	1.17e-05	NO
ENSG00000224520	KRT8P45	-1.18916	0.34791	39.5889	2.02e-07	1.19e-05	NO
ENSG00000232160	RAP2C-AS1	0.596567	2.433	39.5763	2.03e-07	1.19e-05	NO
ENSG00000147642	SYBU	-1.96303	-1.1075	39.4996	2.07e-07	1.21e-05	DOWN
ENSG00000147202	DIAPH2	0.87162	5.44421	39.4352	2.1e-07	1.23e-05	NO
ENSG00000179403	VWA1	-1.53178	2.20354	39.3947	2.12e-07	1.24e-05	DOWN
ENSG00000186081	KRT5	-4.90417	1.28788	39.3516	2.18e-07	1.27e-05	DOWN
ENSG00000100644	HIF1A	0.876456	10.528	39.2893	2.18e-07	1.27e-05	NO
ENSG00000184005	ST6GALNAC3	-1.52797	1.17307	39.1592	2.25e-07	1.3e-05	DOWN
ENSG00000184293	CLECL1	1.30297	-1.51928	39.0544	2.31e-07	1.34e-05	NO
ENSG00000169895	SYAP1	0.463951	6.01799	39.0452	2.32e-07	1.34e-05	NO
ENSG00000155719	OTOA	0.886756	1.33505	39.0007	2.35e-07	1.35e-05	NO
ENSG00000204323	SMIM5	-1.85926	-1.8207	38.9954	2.35e-07	1.35e-05	DOWN
ENSG00000172236	TPSAB1	6.31471	-0.902514	38.9182	2.43e-07	1.39e-05	UP
ENSG00000133935	ERG28	-0.471568	3.73689	38.6818	2.55e-07	1.45e-05	NO
ENSG00000235649	MXRA5Y	1.01928	0.815219	38.61	2.59e-07	1.47e-05	NO
ENSG00000274225	AP001065.1	-1.25519	-0.962626	38.4337	2.71e-07	1.54e-05	NO
ENSG00000107485	GATA3	-1.2197	1.37189	38.4046	2.73e-07	1.55e-05	NO
ENSG00000142949	PTPRF	-0.949262	6.18113	38.3805	2.75e-07	1.55e-05	NO
ENSG00000124466	LYPD3	-3.00385	1.59443	38.4148	2.77e-07	1.56e-05	DOWN
ENSG00000235217	TSPY26P	-1.21753	1.22323	38.2895	2.82e-07	1.58e-05	NO
ENSG00000137269	LRRC1	-1.22124	2.11602	38.1359	2.93e-07	1.64e-05	NO
ENSG00000145107	TM4SF19	1.72542	3.54145	38.1818	2.94e-07	1.64e-05	UP
ENSG00000106541	AGR2	-3.74291	0.554166	38.1571	2.96e-07	1.65e-05	DOWN
ENSG00000003137	CYP26B1	-2.47216	-0.223813	37.9811	3.08e-07	1.71e-05	DOWN
ENSG00000183087	GAS6	-0.664365	6.10258	37.8401	3.17e-07	1.75e-05	NO
ENSG00000008441	NFIX	-0.755796	3.47879	37.7818	3.21e-07	1.77e-05	NO
ENSG00000101844	ATG4A	0.765117	4.39695	37.7804	3.22e-07	1.77e-05	NO
ENSG00000125848	FLRT3	-2.03107	1.3454	37.8005	3.23e-07	1.77e-05	DOWN
ENSG00000204542	C6orf15	-4.12608	-2.57947	37.7507	3.24e-07	1.77e-05	DOWN
ENSG00000170561	IRX2	2.18778	-0.553179	37.7352	3.25e-07	1.78e-05	UP
ENSG00000168672	FAM84B	-1.81682	4.41929	37.7279	3.31e-07	1.8e-05	DOWN
ENSG00000087842	PIR	0.753659	3.52658	37.586	3.38e-07	1.83e-05	NO
ENSG00000106772	PRUNE2	1.0682	3.71726	37.5859	3.38e-07	1.83e-05	NO
ENSG00000253304	TMEM200B	-1.00094	1.02365	37.5825	3.39e-07	1.83e-05	NO
ENSG00000172005	MAL	-4.36076	-0.492094	37.6345	3.39e-07	1.83e-05	DOWN
ENSG00000111057	KRT18	-1.24093	8.05323	37.545	3.45e-07	1.86e-05	NO
ENSG00000132613	MTSS1L	-0.82945	4.12125	37.34	3.61e-07	1.94e-05	NO
ENSG00000130812	ANGPTL6	0.866378	0.0667854	37.2835	3.66e-07	1.96e-05	NO
ENSG00000149090	PAMR1	1.44558	0.961677	37.2632	3.68e-07	1.97e-05	NO
ENSG00000147364	FBXO25	0.413075	4.13475	37.1502	3.79e-07	2.02e-05	NO
ENSG00000166923	GREM1	1.69258	7.43785	37.1606	3.83e-07	2.04e-05	UP
ENSG00000249378	LINC01060	3.3749	-3.10081	36.9717	3.97e-07	2.11e-05	UP
ENSG00000232389	AL583856.1	1.06702	1.8956	36.8958	4.05e-07	2.14e-05	NO
ENSG00000133195	SLC39A11	0.881488	5.85943	36.894	4.06e-07	2.14e-05	NO
ENSG00000101782	RIOK3	0.562601	6.44463	36.8441	4.11e-07	2.16e-05	NO
ENSG00000168243	GNG4	-1.75805	0.423006	36.7528	4.21e-07	2.21e-05	DOWN
ENSG00000164078	MST1R	-2.29284	-1.62964	36.7169	4.25e-07	2.22e-05	DOWN
ENSG00000165118	C9orf64	-0.574872	2.4519	36.6887	4.28e-07	2.24e-05	NO
ENSG00000173801	JUP	-1.56716	4.80435	36.5624	4.49e-07	2.34e-05	DOWN
ENSG00000142303	ADAMTS10	-1.46638	1.49966	36.4998	4.5e-07	2.34e-05	NO
ENSG00000164308	ERAP2	0.787812	4.17672	36.4458	4.57e-07	2.37e-05	NO
ENSG00000044446	PHKA2	0.776523	4.88745	36.427	4.59e-07	2.37e-05	NO
ENSG00000182326	C1S	0.766975	5.50735	36.4148	4.6e-07	2.37e-05	NO
ENSG00000178922	HYI	-0.40378	3.35211	36.3906	4.63e-07	2.38e-05	NO
ENSG00000249669	CARMN	2.1867	0.673054	36.4149	4.64e-07	2.38e-05	UP
ENSG00000101489	CELF4	-2.1949	-2.00707	36.367	4.66e-07	2.39e-05	DOWN
ENSG00000203499	IQANK1	-1.06662	-0.459192	36.3288	4.71e-07	2.41e-05	NO
ENSG00000145113	MUC4	-3.51616	-0.823185	36.3388	4.76e-07	2.43e-05	DOWN
ENSG00000134762	DSC3	-1.08073	4.70993	36.2578	4.83e-07	2.46e-05	NO
ENSG00000264707	L3MBTL4-AS1	0.901532	2.82974	36.2029	4.87e-07	2.47e-05	NO
ENSG00000169860	P2RY1	0.699977	2.91376	36.1618	4.92e-07	2.49e-05	NO
ENSG00000259436	AC010247.2	-1.3926	-0.0706382	36.126	4.97e-07	2.51e-05	NO
ENSG00000182117	NOP10	0.416482	7.23419	36.1055	5e-07	2.52e-05	NO
ENSG00000169550	MUC15	-5.25159	-2.63534	36.0934	5.01e-07	2.52e-05	DOWN
ENSG00000125648	SLC25A23	-0.592522	5.02159	36.0452	5.08e-07	2.54e-05	NO
ENSG00000244073	RPS4XP6	0.891331	-0.862978	36.0449	5.08e-07	2.54e-05	NO
ENSG00000121413	ZSCAN18	-1.06992	2.10901	35.9971	5.14e-07	2.57e-05	NO
ENSG00000188419	CHM	0.997283	5.5255	35.9703	5.21e-07	2.59e-05	NO
ENSG00000255364	SMILR	2.43897	-2.49501	35.7726	5.46e-07	2.71e-05	UP
ENSG00000157326	DHRS4	0.452655	3.80563	35.763	5.48e-07	2.71e-05	NO
ENSG00000163975	MELTF	-1.08596	3.25105	35.7441	5.5e-07	2.72e-05	NO
ENSG00000261373	VPS9D1-AS1	-1.36507	0.598296	35.7192	5.54e-07	2.73e-05	NO
ENSG00000215808	LINC01139	2.16364	-0.643976	35.6888	5.59e-07	2.75e-05	UP
ENSG00000047249	ATP6V1H	0.62631	6.75515	35.6604	5.63e-07	2.76e-05	NO
ENSG00000183018	SPNS2	-3.10238	1.53674	35.7041	5.64e-07	2.76e-05	DOWN
ENSG00000109113	RAB34	-0.433701	5.5335	35.5709	5.77e-07	2.81e-05	NO
ENSG00000153294	ADGRF4	-1.98018	0.456821	35.5728	5.77e-07	2.81e-05	DOWN
ENSG00000012171	SEMA3B	-1.35727	0.276224	35.5588	5.78e-07	2.81e-05	NO
ENSG00000119771	KLHL29	-0.904629	2.77405	35.5328	5.83e-07	2.83e-05	NO
ENSG00000104892	KLC3	-2.9421	-1.50069	35.4668	5.95e-07	2.88e-05	DOWN
ENSG00000105492	SIGLEC6	-2.09897	-0.124417	35.4125	6.02e-07	2.91e-05	DOWN
ENSG00000206129	AC006305.1	2.19249	-2.6663	35.3643	6.1e-07	2.94e-05	UP
ENSG00000181789	COPG1	0.271243	7.60172	35.3515	6.12e-07	2.94e-05	NO
ENSG00000113209	PCDHB5	-4.20307	1.44945	35.3797	6.15e-07	2.95e-05	DOWN
ENSG00000248360	LINC00504	1.85851	1.02216	35.3328	6.16e-07	2.95e-05	UP
ENSG00000235275	KRT18P16	-1.41487	-1.85969	35.3185	6.17e-07	2.95e-05	NO
ENSG00000138449	SLC40A1	-1.81675	0.701892	35.273	6.25e-07	2.98e-05	DOWN
ENSG00000174804	FZD4	-0.730968	2.50546	35.0727	6.59e-07	3.13e-05	NO
ENSG00000116791	CRYZ	-0.513218	4.074	35.0679	6.6e-07	3.13e-05	NO
ENSG00000141698	NT5C3B	-0.625738	3.50199	35.0614	6.61e-07	3.13e-05	NO
ENSG00000143545	RAB13	0.427681	5.14283	35.0457	6.64e-07	3.14e-05	NO
ENSG00000237398	HLA-DPA3	2.38989	-0.592912	35.0009	6.73e-07	3.17e-05	UP
ENSG00000171680	PLEKHG5	-1.31212	2.8947	34.9998	6.74e-07	3.17e-05	NO
ENSG00000182795	C1orf116	-2.35751	1.52926	34.9792	6.85e-07	3.22e-05	DOWN
ENSG00000187824	TMEM220	-0.793835	0.193479	34.8964	6.92e-07	3.24e-05	NO
ENSG00000162594	IL23R	2.00659	-2.35194	34.8847	6.94e-07	3.24e-05	UP
ENSG00000147697	GSDMC	-3.72032	-3.13651	34.8672	6.97e-07	3.25e-05	DOWN
ENSG00000189430	NCR1	2.0878	-2.1635	34.8462	7.01e-07	3.26e-05	UP
ENSG00000171236	LRG1	1.2094	1.17288	34.7481	7.2e-07	3.34e-05	NO
ENSG00000130368	MAS1	2.17427	-1.58096	34.7318	7.23e-07	3.35e-05	UP
ENSG00000142494	SLC47A1	1.42873	2.41807	34.7292	7.25e-07	3.35e-05	NO
ENSG00000182489	XKRX	2.69449	0.912694	34.7125	7.36e-07	3.4e-05	UP
ENSG00000090487	SPG21	0.500878	6.86257	34.6475	7.4e-07	3.41e-05	NO
ENSG00000213080	AL354714.2	1.08089	1.21994	34.6324	7.43e-07	3.41e-05	NO
ENSG00000161040	FBXL13	0.904466	0.141269	34.5714	7.55e-07	3.46e-05	NO
ENSG00000140379	BCL2A1	1.09205	6.76498	34.481	7.8e-07	3.57e-05	NO
ENSG00000164976	MYORG	-1.04531	2.25393	34.4375	7.84e-07	3.58e-05	NO
ENSG00000095539	SEMA4G	-1.58084	0.296841	34.3986	7.92e-07	3.61e-05	DOWN
ENSG00000223768	LINC00205	-0.569327	2.99328	34.3877	7.94e-07	3.61e-05	NO
ENSG00000229894	GK3P	1.40906	-0.558311	34.3464	8.03e-07	3.64e-05	NO
ENSG00000074211	PPP2R2C	-1.98155	-1.77884	34.2957	8.14e-07	3.68e-05	DOWN
ENSG00000262003	AC087392.1	1.05234	-0.050122	34.283	8.17e-07	3.69e-05	NO
ENSG00000125520	SLC2A4RG	-0.667503	3.7256	34.2671	8.21e-07	3.7e-05	NO
ENSG00000099954	CECR2	-0.957857	2.32091	34.2183	8.32e-07	3.74e-05	NO
ENSG00000137496	IL18BP	0.900918	5.14711	34.1718	8.43e-07	3.78e-05	NO
ENSG00000168907	PLA2G4F	-4.01415	-3.07648	34.1479	8.48e-07	3.8e-05	DOWN
ENSG00000060140	STYK1	-2.18506	-1.24031	34.11	8.57e-07	3.83e-05	DOWN
ENSG00000106526	ACTR3C	1.20247	-0.744407	34.0549	8.7e-07	3.88e-05	NO
ENSG00000205420	KRT6A	-3.82301	4.36583	34.0867	8.73e-07	3.88e-05	DOWN
ENSG00000163141	BNIPL	-1.87589	-1.38694	34.0164	8.79e-07	3.9e-05	DOWN
ENSG00000007237	GAS7	-0.53163	7.82857	33.9497	8.95e-07	3.97e-05	NO
ENSG00000054219	LY75	-1.02796	1.70562	33.9064	9.06e-07	4e-05	NO
ENSG00000152953	STK32B	1.08389	2.64559	33.9036	9.07e-07	4e-05	NO
ENSG00000088899	LZTS3	-0.935508	2.53941	33.8354	9.24e-07	4.07e-05	NO
ENSG00000006756	ARSD	0.53799	5.83751	33.7527	9.45e-07	4.15e-05	NO
ENSG00000213937	CLDN9	-2.64307	-2.32686	33.6618	9.69e-07	4.25e-05	DOWN
ENSG00000255112	CHMP1B	0.558265	6.7099	33.6282	9.78e-07	4.28e-05	NO
ENSG00000053108	FSTL4	-1.52905	0.586299	33.5915	9.88e-07	4.32e-05	DOWN
ENSG00000187244	BCAM	-0.920244	3.4686	33.5487	1e-06	4.35e-05	NO
ENSG00000178498	DTX3	-1.07189	2.10374	33.5474	1e-06	4.35e-05	NO
ENSG00000149418	ST14	0.88031	4.10142	33.5373	1e-06	4.35e-05	NO
ENSG00000175893	ZDHHC21	0.454585	4.45706	33.5303	1.01e-06	4.35e-05	NO
ENSG00000266920	ACTBP9	0.579973	1.98161	33.5016	1.01e-06	4.38e-05	NO
ENSG00000152766	ANKRD22	2.06395	-0.596784	33.4627	1.02e-06	4.42e-05	UP
ENSG00000176049	JAKMIP2	1.59166	4.4166	33.3318	1.07e-06	4.63e-05	UP
ENSG00000164107	HAND2	-1.10707	2.36359	33.2783	1.08e-06	4.63e-05	NO
ENSG00000114423	CBLB	0.701322	6.64951	33.2246	1.09e-06	4.69e-05	NO
ENSG00000267640	AC016582.3	-2.45684	-1.37372	33.2233	1.1e-06	4.69e-05	DOWN
ENSG00000019169	MARCO	3.37923	3.35946	33.2204	1.11e-06	4.73e-05	UP
ENSG00000237523	LINC00857	-1.26556	-1.17848	33.1222	1.13e-06	4.8e-05	NO
ENSG00000107798	LIPA	0.614703	10.7717	33.0957	1.13e-06	4.82e-05	NO
ENSG00000168143	FAM83B	-2.24769	-0.246488	33.108	1.14e-06	4.82e-05	DOWN
ENSG00000162704	ARPC5	0.433615	8.14928	33.055	1.15e-06	4.85e-05	NO
ENSG00000008323	PLEKHG6	-1.82968	-0.851253	33.0508	1.15e-06	4.85e-05	DOWN
ENSG00000264644	KRT18P8	-1.61837	-1.71969	33.0091	1.16e-06	4.9e-05	DOWN
ENSG00000231826	LINC01819	-3.64545	-2.29853	32.9497	1.18e-06	4.98e-05	DOWN
ENSG00000276170	AC244153.1	-0.720364	0.310912	32.9069	1.2e-06	5.02e-05	NO
ENSG00000152256	PDK1	0.526917	4.18657	32.9036	1.2e-06	5.02e-05	NO
ENSG00000174567	GOLT1A	-3.06437	-2.77176	32.8974	1.2e-06	5.02e-05	DOWN
ENSG00000181617	FDCSP	3.27823	-1.63887	32.8471	1.22e-06	5.11e-05	UP
ENSG00000183186	C2CD4C	-1.93907	-1.3999	32.7236	1.26e-06	5.24e-05	DOWN
ENSG00000224081	SLC44A3-AS1	-1.59576	-0.95028	32.7195	1.26e-06	5.24e-05	DOWN
ENSG00000105877	DNAH11	-2.112	-1.25651	32.654	1.28e-06	5.31e-05	DOWN
ENSG00000189334	S100A14	-2.75499	-2.17671	32.6483	1.28e-06	5.31e-05	DOWN
ENSG00000149582	TMEM25	-1.1629	1.60381	32.6445	1.29e-06	5.31e-05	NO
ENSG00000102760	RGCC	0.921601	6.62568	32.6482	1.29e-06	5.31e-05	NO
ENSG00000118777	ABCG2	0.594079	1.53966	32.6281	1.29e-06	5.32e-05	NO
ENSG00000188505	NCCRP1	-2.98155	-1.57917	32.5951	1.3e-06	5.36e-05	DOWN
ENSG00000150045	KLRF1	2.96405	-1.52679	32.6107	1.31e-06	5.37e-05	UP
ENSG00000055732	MCOLN3	1.2554	3.48439	32.5289	1.34e-06	5.48e-05	NO
ENSG00000122870	BICC1	1.25703	2.04264	32.4828	1.35e-06	5.5e-05	NO
ENSG00000146904	EPHA1	-2.09378	-1.00009	32.3746	1.39e-06	5.66e-05	DOWN
ENSG00000163485	ADORA1	-1.0373	0.512183	32.3136	1.41e-06	5.75e-05	NO
ENSG00000169756	LIMS1	0.546222	7.89923	32.2937	1.42e-06	5.77e-05	NO
ENSG00000120068	HOXB8	-1.37876	0.593457	32.2712	1.43e-06	5.79e-05	NO
ENSG00000178401	DNAJC22	-1.18093	-0.304318	32.2664	1.43e-06	5.79e-05	NO
ENSG00000286132		-1.57423	-1.8677	32.2339	1.44e-06	5.83e-05	DOWN
ENSG00000135116	HRK	1.15105	1.81611	32.2324	1.44e-06	5.83e-05	NO
ENSG00000176971	FIBIN	1.78016	-0.0451191	32.1763	1.47e-06	5.91e-05	UP
ENSG00000251664	PCDHA12	-0.895422	0.278374	32.1579	1.47e-06	5.93e-05	NO
ENSG00000198743	SLC5A3	0.762433	5.44998	32.0671	1.51e-06	6.07e-05	NO
ENSG00000152939	MARVELD2	-1.46282	0.164157	32.0193	1.53e-06	6.14e-05	NO
ENSG00000185070	FLRT2	0.574774	4.82482	31.9815	1.55e-06	6.2e-05	NO
ENSG00000167861	HID1	-2.35509	0.206623	31.9505	1.57e-06	6.28e-05	DOWN
ENSG00000092607	TBX15	2.14761	-0.365094	31.9006	1.59e-06	6.35e-05	UP
ENSG00000175084	DES	2.2127	2.80243	31.9061	1.6e-06	6.37e-05	UP
ENSG00000170421	KRT8	-1.06618	8.59088	31.8687	1.61e-06	6.39e-05	NO
ENSG00000197822	OCLN	-2.53553	-0.596906	31.7924	1.65e-06	6.52e-05	DOWN
ENSG00000138759	FRAS1	-1.46819	2.79276	31.7247	1.68e-06	6.63e-05	NO
ENSG00000105825	TFPI2	-1.44739	5.07597	31.7355	1.68e-06	6.63e-05	NO
ENSG00000095209	TMEM38B	0.544261	4.6049	31.6819	1.69e-06	6.65e-05	NO
ENSG00000164695	CHMP4C	-1.68101	-0.333369	31.6323	1.71e-06	6.73e-05	DOWN
ENSG00000116701	NCF2	0.712236	8.14492	31.5608	1.75e-06	6.85e-05	NO
ENSG00000188916	FAM196A	1.29114	0.141541	31.5446	1.75e-06	6.86e-05	NO
ENSG00000226145	KRT16P6	-3.77223	-1.77949	31.5667	1.76e-06	6.86e-05	DOWN
ENSG00000198932	GPRASP1	-0.982085	1.51555	31.5173	1.77e-06	6.9e-05	NO
ENSG00000130066	SAT1	0.698797	9.55843	31.5069	1.77e-06	6.91e-05	NO
ENSG00000158825	CDA	0.701229	2.80797	31.4986	1.78e-06	6.91e-05	NO
ENSG00000106049	HIBADH	0.415266	5.19655	31.4767	1.79e-06	6.94e-05	NO
ENSG00000254285	KRT8P3	-1.0411	2.51823	31.4694	1.79e-06	6.94e-05	NO
ENSG00000169429	CXCL8	1.94889	12.6479	31.4971	1.8e-06	6.95e-05	UP
ENSG00000115306	SPTBN1	-0.625059	7.22313	31.4326	1.81e-06	6.99e-05	NO
ENSG00000165802	NSMF	-0.610198	4.79854	31.4204	1.82e-06	7e-05	NO
ENSG00000112559	MDFI	-0.893739	2.36557	31.3367	1.86e-06	7.16e-05	NO
ENSG00000174482	LINGO2	-1.43232	0.613563	31.3275	1.87e-06	7.17e-05	NO
ENSG00000204228	HSD17B8	-0.774268	1.14423	31.3113	1.87e-06	7.19e-05	NO
ENSG00000142623	PADI1	-1.21527	-0.500847	31.3011	1.88e-06	7.19e-05	NO
ENSG00000162692	VCAM1	2.17307	4.05922	31.3163	1.89e-06	7.23e-05	UP
ENSG00000141040	ZNF287	-0.618533	1.49077	31.2628	1.9e-06	7.25e-05	NO
ENSG00000260303	AC108206.1	2.84678	-2.94478	31.2352	1.92e-06	7.29e-05	UP
ENSG00000118898	PPL	-2.90165	1.98782	31.2289	1.94e-06	7.36e-05	DOWN
ENSG00000242611	AC093627.6	1.85961	-0.548239	31.1901	1.94e-06	7.36e-05	UP
ENSG00000144063	MALL	-1.70327	-1.0313	31.1769	1.95e-06	7.37e-05	DOWN
ENSG00000065357	DGKA	-0.68552	4.03336	31.1175	1.98e-06	7.48e-05	NO
ENSG00000151067	CACNA1C	0.963685	1.24609	31.1158	1.98e-06	7.48e-05	NO
ENSG00000019991	HGF	1.54315	1.45114	31.0414	2.03e-06	7.63e-05	UP
ENSG00000129194	SOX15	-2.67806	-1.55601	31.0073	2.05e-06	7.7e-05	DOWN
ENSG00000174669	SLC29A2	-0.808514	1.05689	30.9447	2.08e-06	7.81e-05	NO
ENSG00000135312	HTR1B	1.18076	-0.350295	30.9391	2.09e-06	7.81e-05	NO
ENSG00000112837	TBX18	0.682592	3.2321	30.8836	2.12e-06	7.91e-05	NO
ENSG00000103316	CRYM	1.89882	-2.42246	30.8817	2.12e-06	7.91e-05	UP
ENSG00000214207	KRT18P10	-1.72262	-0.927695	30.8707	2.13e-06	7.92e-05	DOWN
ENSG00000164647	STEAP1	1.47759	0.143429	30.8537	2.14e-06	7.95e-05	NO
ENSG00000149970	CNKSR2	-1.51002	-5.21e-05	30.7669	2.19e-06	8.14e-05	DOWN
ENSG00000178172	SPINK6	1.94777	3.48425	30.7668	2.22e-06	8.21e-05	UP
ENSG00000233384	AC096537.1	0.783532	1.06837	30.6052	2.3e-06	8.5e-05	NO
ENSG00000153989	NUS1	0.343329	6.15111	30.5545	2.33e-06	8.61e-05	NO
ENSG00000162746	FCRLB	1.30322	0.00398716	30.5343	2.34e-06	8.63e-05	NO
ENSG00000164694	FNDC1	0.949531	0.524645	30.5309	2.35e-06	8.63e-05	NO
ENSG00000143375	CGN	-1.77336	0.884276	30.4808	2.39e-06	8.77e-05	DOWN
ENSG00000087495	PHACTR3	-2.68733	-3.00801	30.4269	2.42e-06	8.87e-05	DOWN
ENSG00000174233	ADCY6	-0.503231	4.91122	30.3773	2.45e-06	8.98e-05	NO
ENSG00000226674	TEX41	1.19993	-0.3979	30.361	2.46e-06	9.01e-05	NO
ENSG00000232759	AC002480.2	1.24925	1.45173	30.3446	2.48e-06	9.03e-05	NO
ENSG00000085741	WNT11	-2.79823	-2.63001	30.3266	2.49e-06	9.07e-05	DOWN
ENSG00000184489	PTP4A3	-1.13262	0.415411	30.2679	2.53e-06	9.21e-05	NO
ENSG00000150551	LYPD1	-0.81581	3.68388	30.1847	2.59e-06	9.4e-05	NO
ENSG00000188868	ZNF563	-1.29713	-0.0481962	30.1837	2.59e-06	9.4e-05	NO
ENSG00000213771	KRT8P37	-1.25119	-0.71441	30.1742	2.6e-06	9.41e-05	NO
ENSG00000169583	CLIC3	-1.36898	-0.545878	30.1327	2.63e-06	9.51e-05	NO
ENSG00000153956	CACNA2D1	0.995686	4.6219	30.1401	2.64e-06	9.52e-05	NO
ENSG00000163993	S100P	-2.29605	-1.72059	30.1174	2.65e-06	9.52e-05	DOWN
ENSG00000169184	MN1	-1.11425	3.28373	30.0951	2.66e-06	9.58e-05	NO
ENSG00000184371	CSF1	1.39226	7.86716	30.0984	2.69e-06	9.64e-05	NO
ENSG00000230838	LINC01614	2.25792	-1.12887	30.0492	2.7e-06	9.67e-05	UP
ENSG00000240668	KRT8P36	-1.09904	0.221488	29.8932	2.82e-06	0.000100947	NO
ENSG00000130038	CRACR2A	0.823668	1.81215	29.836	2.87e-06	0.000102414	NO
ENSG00000162885	B3GALNT2	-0.490646	4.73794	29.8323	2.87e-06	0.000102414	NO
ENSG00000125872	LRRN4	-2.50859	1.99972	29.8615	2.88e-06	0.000102438	DOWN
ENSG00000158887	MPZ	-0.629032	0.142642	29.7927	2.91e-06	0.000103259	NO
ENSG00000149534	MS4A2	6.26554	-3.55787	32.0007	2.91e-06	0.000103269	UP
ENSG00000144452	ABCA12	-2.34858	-0.565115	29.7734	2.94e-06	0.000103996	DOWN
ENSG00000100784	RPS6KA5	0.88636	1.8697	29.7514	2.94e-06	0.000103996	NO
ENSG00000156500	FAM122C	0.611881	1.23747	29.6923	2.99e-06	0.000105635	NO
ENSG00000188112	C6orf132	-0.699171	2.66985	29.6334	3.05e-06	0.000107294	NO
ENSG00000204304	PBX2	-0.377331	5.57573	29.5436	3.13e-06	0.000109973	NO
ENSG00000141738	GRB7	-1.9569	-1.25564	29.5288	3.14e-06	0.000110271	DOWN
ENSG00000267416	AC025048.4	1.20995	2.18275	29.4647	3.2e-06	0.000112182	NO
ENSG00000115339	GALNT3	-1.18221	1.38676	29.4297	3.23e-06	0.000113154	NO
ENSG00000104413	ESRP1	-3.49173	0.487303	29.418	3.28e-06	0.000114525	DOWN
ENSG00000147251	DOCK11	1.14567	6.63225	29.3999	3.29e-06	0.00011482	NO
ENSG00000131100	ATP6V1E1	0.394666	7.44124	29.3033	3.36e-06	0.000116868	NO
ENSG00000167850	CD300C	0.72988	5.13378	29.2653	3.39e-06	0.00011799	NO
ENSG00000125731	SH2D3A	-2.23622	-0.410856	29.2313	3.45e-06	0.000119647	DOWN
ENSG00000170689	HOXB9	-1.32061	1.22753	29.1907	3.47e-06	0.000120223	NO
ENSG00000128039	SRD5A3	0.457312	4.44518	29.1117	3.55e-06	0.00012281	NO
ENSG00000099812	MISP	-3.13277	-1.25581	29.1377	3.56e-06	0.00012281	DOWN
ENSG00000228328	AL158201.1	0.556924	1.79354	29.0961	3.57e-06	0.000123028	NO
ENSG00000188707	ZBED6CL	1.33971	2.41056	29.0945	3.58e-06	0.000123212	NO
ENSG00000133063	CHIT1	0.848074	5.48787	29.0827	3.59e-06	0.000123212	NO
ENSG00000232949	AC002480.3	1.03829	1.2817	29.034	3.63e-06	0.000124701	NO
ENSG00000114638	UPK1B	-3.40463	2.46835	29.0561	3.65e-06	0.000124942	DOWN
ENSG00000125841	NRSN2	-0.582655	3.99941	28.8306	3.86e-06	0.000132022	NO
ENSG00000274173	AL035661.1	-2.77054	-3.24961	28.7941	3.9e-06	0.000133246	DOWN
ENSG00000237298	TTN-AS1	0.487823	3.25976	28.7745	3.92e-06	0.00013381	NO
ENSG00000130600	H19	-2.7725	4.18809	28.7131	4.04e-06	0.0001373	DOWN
ENSG00000237513	AC007384.1	1.24656	-0.343839	28.6771	4.04e-06	0.0001373	NO
ENSG00000150782	IL18	1.02658	3.76085	28.6747	4.05e-06	0.000137368	NO
ENSG00000134760	DSG1	-4.14621	-2.98886	28.613	4.12e-06	0.000139497	DOWN
ENSG00000099194	SCD	-0.457993	8.05432	28.5974	4.14e-06	0.000139925	NO
ENSG00000159899	NPR2	-0.89316	1.83063	28.5489	4.2e-06	0.000141738	NO
ENSG00000177106	EPS8L2	-2.21253	2.55604	28.5628	4.22e-06	0.000142322	DOWN
ENSG00000143199	ADCY10	1.18006	-1.61149	28.5097	4.25e-06	0.000142952	NO
ENSG00000089682	RBM41	0.5654	3.42015	28.5039	4.25e-06	0.000142971	NO
ENSG00000135439	AGAP2	1.10154	-0.979982	28.4215	4.36e-06	0.000146301	NO
ENSG00000255422	AP002954.1	1.20483	1.76127	28.412	4.37e-06	0.000146485	NO
ENSG00000079393	DUSP13	2.05532	-0.84529	28.342	4.47e-06	0.000149459	UP
ENSG00000186377	CYP4X1	0.893163	2.0995	28.3052	4.51e-06	0.000150765	NO
ENSG00000158477	CD1A	1.1821	-0.0488719	28.2983	4.52e-06	0.000150839	NO
ENSG00000189280	GJB5	-2.74949	-1.69244	28.2834	4.56e-06	0.000151766	DOWN
ENSG00000266916	ZNF793-AS1	-1.94679	-2.102	28.2674	4.57e-06	0.000151766	DOWN
ENSG00000174718	KIAA1551	0.647474	5.63026	28.2337	4.61e-06	0.000153068	NO
ENSG00000135373	EHF	-1.88897	-0.14461	28.2072	4.65e-06	0.000154113	DOWN
ENSG00000184939	ZFP90	-0.427489	3.74829	28.1576	4.72e-06	0.00015611	NO
ENSG00000197081	IGF2R	0.54824	9.73116	28.1279	4.76e-06	0.000157263	NO
ENSG00000134056	MRPS36	0.335205	3.8836	28.0681	4.85e-06	0.000159864	NO
ENSG00000174010	KLHL15	0.94845	4.23042	28.0411	4.89e-06	0.000161059	NO
ENSG00000197472	ZNF695	-2.00578	-2.18071	28.0123	4.93e-06	0.000162064	DOWN
ENSG00000158023	WDR66	-0.909575	0.680966	27.9854	4.97e-06	0.00016313	NO
ENSG00000082482	KCNK2	1.64681	0.583836	27.9776	4.98e-06	0.000163317	UP
ENSG00000081087	OSTM1	0.573098	7.04242	27.9232	5.06e-06	0.000165702	NO
ENSG00000143850	PLEKHA6	-1.86634	0.731799	27.9306	5.08e-06	0.000165947	DOWN
ENSG00000231131	LINC01468	0.686229	2.03682	27.8892	5.11e-06	0.000166892	NO
ENSG00000153395	LPCAT1	-0.401764	6.08779	27.8701	5.14e-06	0.000167601	NO
ENSG00000180190	TDRP	-1.25893	0.852804	27.8134	5.23e-06	0.000170229	NO
ENSG00000047634	SCML1	0.568596	4.24316	27.7785	5.29e-06	0.000171765	NO
ENSG00000156531	PHF6	0.765508	4.86139	27.7083	5.4e-06	0.000175178	NO
ENSG00000069849	ATP1B3	0.392396	7.37979	27.6789	5.45e-06	0.000176474	NO
ENSG00000038002	AGA	0.372828	4.33456	27.6344	5.52e-06	0.000178591	NO
ENSG00000105664	COMP	2.52397	-2.53871	27.6045	5.57e-06	0.00017947	UP
ENSG00000250742	LINC02381	-1.33397	-0.00723804	27.6036	5.58e-06	0.00017947	NO
ENSG00000149968	MMP3	4.14721	1.09569	27.6343	5.58e-06	0.00017947	UP
ENSG00000184227	ACOT1	0.904874	2.06446	27.571	5.63e-06	0.000180954	NO
ENSG00000162129	CLPB	0.356933	4.93596	27.561	5.65e-06	0.000181228	NO
ENSG00000161281	COX7A1	-1.76687	-1.49268	27.5263	5.71e-06	0.000182865	DOWN
ENSG00000164300	SERINC5	0.886611	6.0198	27.5158	5.75e-06	0.000184097	NO
ENSG00000271602	KRT8P49	-1.36633	-1.21072	27.4907	5.77e-06	0.000184097	NO
ENSG00000185420	SMYD3	0.652533	3.68925	27.4893	5.77e-06	0.000184097	NO
ENSG00000144712	CAND2	-1.7041	-0.254261	27.4765	5.79e-06	0.000184535	DOWN
ENSG00000170891	CYTL1	1.44755	2.26214	27.4356	5.9e-06	0.00018757	NO
ENSG00000103064	SLC7A6	-0.342678	5.63598	27.2757	6.16e-06	0.000195556	NO
ENSG00000166033	HTRA1	0.916122	4.45176	27.2338	6.25e-06	0.000198021	NO
ENSG00000259933	AC009065.2	-2.05313	-2.93799	27.1757	6.35e-06	0.000201003	DOWN
ENSG00000090266	NDUFB2	0.274619	5.45859	27.1555	6.39e-06	0.000201943	NO
ENSG00000160606	TLCD1	-0.854523	0.24137	27.1095	6.48e-06	0.000204492	NO
ENSG00000132879	FBXO44	-0.513884	3.01551	27.0426	6.61e-06	0.000208398	NO
ENSG00000279806	AC018629.1	-2.90595	-1.85994	27.0436	6.64e-06	0.000208899	DOWN
ENSG00000186831	KRT17P2	-3.30382	-2.92558	27.0082	6.68e-06	0.000209978	DOWN
ENSG00000218565	AL592429.1	1.08625	1.03505	26.9377	6.83e-06	0.000214238	NO
ENSG00000162378	ZYG11B	0.307074	5.24774	26.9187	6.87e-06	0.00021517	NO
ENSG00000105991	HOXA1	1.204	-1.31046	26.9031	6.9e-06	0.000215882	NO
ENSG00000132965	ALOX5AP	1.43125	7.02748	26.9126	6.94e-06	0.000216896	NO
ENSG00000265688	MAFG-AS1	-1.02147	-0.741164	26.8612	6.99e-06	0.000218029	NO
ENSG00000249825	AC012636.1	2.52658	-2.1342	26.8415	7.03e-06	0.000219026	UP
ENSG00000185989	RASA3	-0.490154	6.47433	26.8201	7.08e-06	0.000220146	NO
ENSG00000138772	ANXA3	-1.68633	4.05392	26.8062	7.17e-06	0.000222763	DOWN
ENSG00000120963	ZNF706	0.281205	5.46308	26.7622	7.2e-06	0.000223432	NO
ENSG00000154102	C16orf74	-1.08747	-0.538847	26.72	7.3e-06	0.000226018	NO
ENSG00000133835	HSD17B4	0.671608	7.58512	26.6399	7.48e-06	0.00023131	NO
ENSG00000186439	TRDN	-1.61135	0.391889	26.6173	7.53e-06	0.000232587	DOWN
ENSG00000167306	MYO5B	-2.38532	1.9214	26.6212	7.59e-06	0.000234053	DOWN
ENSG00000042493	CAPG	0.607392	9.4707	26.5827	7.61e-06	0.000234395	NO
ENSG00000110492	MDK	-1.73626	3.91061	26.5933	7.66e-06	0.000235385	DOWN
ENSG00000226822	AL390036.1	1.52585	-0.589873	26.5365	7.72e-06	0.000236984	UP
ENSG00000144597	EAF1	0.443023	6.63517	26.5299	7.74e-06	0.000236984	NO
ENSG00000143333	RGS16	1.21177	4.92886	26.5572	7.74e-06	0.000236984	NO
ENSG00000255833	TIFAB	-2.34187	-1.32123	26.534	7.76e-06	0.000237063	DOWN
ENSG00000104112	SCG3	0.77079	0.758386	26.5179	7.77e-06	0.000237063	NO
ENSG00000119630	PGF	3.14199	0.825712	26.4744	7.94e-06	0.000242057	UP
ENSG00000143631	FLG	-5.25111	-2.39718	26.4328	8e-06	0.000243494	DOWN
ENSG00000125170	DOK4	-0.58461	3.39731	26.4085	8.03e-06	0.000244141	NO
ENSG00000165678	GHITM	0.317694	7.52886	26.3994	8.05e-06	0.000244483	NO
ENSG00000065054	SLC9A3R2	-1.17622	1.22361	26.3249	8.24e-06	0.000249814	NO
ENSG00000171388	APLN	1.64857	0.109291	26.3173	8.26e-06	0.000250044	UP
ENSG00000138347	MYPN	1.42288	-0.757762	26.3014	8.3e-06	0.000250915	NO
ENSG00000111341	MGP	1.60788	-0.229569	26.2781	8.36e-06	0.000252187	UP
ENSG00000224660	SH3BP5-AS1	-0.435667	3.09229	26.2749	8.37e-06	0.000252187	NO
ENSG00000111783	RFX4	1.70966	-0.967547	26.2713	8.38e-06	0.000252187	UP
ENSG00000198886	MT-ND4	0.32197	13.145	26.1274	8.76e-06	0.000263304	NO
ENSG00000196189	SEMA4A	-1.73915	4.15926	26.144	8.79e-06	0.000263883	DOWN
ENSG00000154764	WNT7A	-2.96091	-0.383769	26.1238	8.85e-06	0.000264736	DOWN
ENSG00000172935	MRGPRF	-1.25982	0.202832	26.0944	8.85e-06	0.000264736	NO
ENSG00000182768	NGRN	-0.291331	3.66466	26.0917	8.86e-06	0.000264736	NO
ENSG00000213943	KRT18P17	-1.11388	-0.815987	26.0873	8.87e-06	0.000264736	NO
ENSG00000025772	TOMM34	-0.3505	4.98423	26.0724	8.91e-06	0.000265538	NO
ENSG00000155269	GPR78	-2.1177	-1.34496	26.0685	8.92e-06	0.000265538	DOWN
ENSG00000139182	CLSTN3	-0.878723	3.1786	26.06	8.95e-06	0.000265869	NO
ENSG00000154736	ADAMTS5	-1.2604	1.40882	26.0258	9.04e-06	0.000268331	NO
ENSG00000115257	PCSK4	-1.26045	-1.28053	25.9619	9.22e-06	0.000273329	NO
ENSG00000134248	LAMTOR5	0.321823	5.56514	25.957	9.24e-06	0.000273365	NO
ENSG00000182648	LINC01006	-0.717521	0.975892	25.9506	9.26e-06	0.000273534	NO
ENSG00000236144	TMEM147-AS1	-0.443694	2.42321	25.9269	9.32e-06	0.000275174	NO
ENSG00000060762	MPC1	0.500904	4.8728	25.9143	9.36e-06	0.000275804	NO
ENSG00000104369	JPH1	-1.40703	0.71104	25.9106	9.37e-06	0.000275804	NO
ENSG00000104918	RETN	-0.919398	2.03712	25.8897	9.43e-06	0.000277223	NO
ENSG00000183346	CABCOCO1	-1.87521	-2.89729	25.8742	9.48e-06	0.000278181	DOWN
ENSG00000151729	SLC25A4	-0.436166	3.74337	25.8328	9.6e-06	0.0002814	NO
ENSG00000145945	FAM50B	-1.33762	-0.638253	25.7794	9.76e-06	0.000285725	NO
ENSG00000162069	BICDL2	-3.08747	-2.32255	25.7739	9.78e-06	0.000285828	DOWN
ENSG00000142675	CNKSR1	-2.28654	-0.168271	25.731	9.97e-06	0.000291017	DOWN
ENSG00000179178	TMEM125	-2.62515	-2.73844	25.7011	1e-05	0.000291595	DOWN
ENSG00000075785	RAB7A	0.34083	8.95067	25.6679	1.01e-05	0.000294228	NO
ENSG00000234684	SDCBP2-AS1	-0.887954	-0.347913	25.5939	1.03e-05	0.000300705	NO
ENSG00000172057	ORMDL3	-0.388863	4.83572	25.5819	1.04e-05	0.000301422	NO
ENSG00000131981	LGALS3	0.624725	7.42514	25.5694	1.04e-05	0.000302192	NO
ENSG00000258976	AC013451.2	1.28361	-1.40065	25.5521	1.05e-05	0.000303412	NO
ENSG00000105642	KCNN1	-1.69456	-2.12756	25.5233	1.06e-05	0.000305752	DOWN
ENSG00000109686	SH3D19	-0.855819	3.55963	25.5059	1.06e-05	0.000306483	NO
ENSG00000221164	SNORA11F	-1.20115	-2.09569	25.5039	1.06e-05	0.000306483	NO
ENSG00000197312	DDI2	0.376316	5.55771	25.5026	1.06e-05	0.000306483	NO
ENSG00000103485	QPRT	-1.13313	4.73218	25.5107	1.07e-05	0.00030777	NO
ENSG00000166313	APBB1	-0.912669	3.16913	25.4694	1.08e-05	0.000308857	NO
ENSG00000092445	TYRO3	-0.645095	3.0747	25.4633	1.08e-05	0.000309029	NO
ENSG00000173482	PTPRM	0.518123	5.37166	25.3971	1.1e-05	0.000315066	NO
ENSG00000108592	FTSJ3	-0.209012	5.52876	25.3931	1.1e-05	0.000315066	NO
ENSG00000169435	RASSF6	-2.9326	-2.76301	25.3651	1.11e-05	0.00031742	DOWN
ENSG00000166670	MMP10	1.48322	2.28082	25.2353	1.16e-05	0.00033187	NO
ENSG00000067606	PRKCZ	-1.9837	1.05225	25.1964	1.18e-05	0.000336052	DOWN
ENSG00000260942	CAPN10-AS1	-0.516105	0.692469	25.1709	1.18e-05	0.000336052	NO
ENSG00000227398	KIF9-AS1	-0.974417	-0.278574	25.1588	1.19e-05	0.000336885	NO
ENSG00000262160	AC020978.5	-1.96744	-2.40446	25.1299	1.2e-05	0.000339515	DOWN
ENSG00000184635	ZNF93	-0.94002	2.43468	25.1229	1.2e-05	0.000339808	NO
ENSG00000167992	VWCE	-0.868843	0.183648	25.116	1.2e-05	0.000340099	NO
ENSG00000175707	KDF1	-1.97344	-2.13487	25.1032	1.21e-05	0.000341017	DOWN
ENSG00000116990	MYCL	1.06115	0.978761	25.086	1.21e-05	0.000342414	NO
ENSG00000102100	SLC35A2	0.559933	4.81531	25.0623	1.22e-05	0.000344534	NO
ENSG00000268089	GABRQ	-1.54017	-0.0548962	25.0545	1.23e-05	0.000344919	DOWN
ENSG00000238266	LINC00707	-2.03096	-2.43669	25.0466	1.23e-05	0.000345326	DOWN
ENSG00000164171	ITGA2	-0.782427	5.98496	24.9817	1.25e-05	0.000352227	NO
ENSG00000169946	ZFPM2	-1.05081	1.96443	24.948	1.27e-05	0.000355312	NO
ENSG00000123342	MMP19	0.652461	7.14072	24.9248	1.28e-05	0.00035746	NO
ENSG00000111144	LTA4H	0.763773	5.98784	24.9203	1.28e-05	0.000357505	NO
ENSG00000156475	PPP2R2B	-1.35587	2.18275	24.8688	1.31e-05	0.000364518	NO
ENSG00000100554	ATP6V1D	0.334024	6.67496	24.8388	1.31e-05	0.000365879	NO
ENSG00000250486	FAM218A	-1.75496	-3.3121	24.8332	1.31e-05	0.000366054	DOWN
ENSG00000101868	POLA1	0.879815	4.69326	24.7996	1.33e-05	0.000370643	NO
ENSG00000120280	CXorf21	1.51302	4.95701	24.8037	1.34e-05	0.000371238	UP
ENSG00000102174	PHEX	1.04775	-0.860842	24.7764	1.34e-05	0.000371238	NO
ENSG00000171101	SIGLEC17P	1.1337	0.219771	24.7474	1.35e-05	0.000374186	NO
ENSG00000081051	AFP	-2.24598	-1.15519	24.7244	1.37e-05	0.000378112	DOWN
ENSG00000151778	SERP2	-1.28933	-1.16971	24.6973	1.37e-05	0.000379201	NO
ENSG00000122877	EGR2	0.979428	6.4807	24.6812	1.39e-05	0.000382704	NO
ENSG00000187583	PLEKHN1	-1.13976	-0.0695398	24.6466	1.39e-05	0.000383924	NO
ENSG00000111339	ART4	-2.66701	-1.39954	24.66	1.4e-05	0.000383924	DOWN
ENSG00000164604	GPR85	0.675473	3.58431	24.642	1.4e-05	0.000383924	NO
ENSG00000184831	APOO	1.01246	3.65042	24.6413	1.4e-05	0.000385026	NO
ENSG00000197506	SLC28A3	0.872243	4.86355	24.6361	1.4e-05	0.000385064	NO
ENSG00000243663	RPS4XP14	1.19075	-2.59389	24.6128	1.41e-05	0.000386014	NO
ENSG00000147570	DNAJC5B	1.07026	0.487544	24.5503	1.44e-05	0.000393248	NO
ENSG00000100105	PATZ1	-0.361662	3.89142	24.5424	1.44e-05	0.000393733	NO
ENSG00000175264	CHST1	-1.09165	-0.39272	24.5232	1.45e-05	0.00039565	NO
ENSG00000230630	DNM3OS	0.95824	0.863577	24.5054	1.46e-05	0.00039738	NO
ENSG00000138829	FBN2	-1.16447	6.8772	24.4958	1.47e-05	0.000401275	NO
ENSG00000099998	GGT5	1.8942	-0.663745	24.465	1.48e-05	0.000401953	UP
ENSG00000094841	UPRT	0.915149	4.08095	24.4132	1.5e-05	0.000408221	NO
ENSG00000051382	PIK3CB	0.56384	5.54985	24.3795	1.52e-05	0.000411551	NO
ENSG00000006453	BAIAP2L1	-1.10987	2.91251	24.3354	1.54e-05	0.000417591	NO
ENSG00000169442	CD52	1.96886	5.89187	24.3507	1.54e-05	0.000417591	UP
ENSG00000005893	LAMP2	0.71367	8.45872	24.3157	1.55e-05	0.000418427	NO
ENSG00000182934	SRPRA	0.259537	7.22472	24.2945	1.56e-05	0.000420737	NO
ENSG00000137767	SQOR	1.42424	5.22162	24.3119	1.56e-05	0.000421186	NO
ENSG00000134744	ZCCHC11	-0.343276	4.35505	24.2737	1.57e-05	0.000422468	NO
ENSG00000214203	RPS4XP1	0.688466	-0.424418	24.2698	1.57e-05	0.000422468	NO
ENSG00000224167	AL390729.1	-1.19246	-2.15092	24.2653	1.57e-05	0.000422544	NO
ENSG00000163638	ADAMTS9	-1.5544	4.60097	24.2771	1.58e-05	0.000423752	DOWN
ENSG00000170477	KRT4	-3.85575	-1.16492	24.2142	1.61e-05	0.000431807	DOWN
ENSG00000197594	ENPP1	1.13918	3.18243	24.1108	1.66e-05	0.000444256	NO
ENSG00000075673	ATP12A	-4.41997	-1.16946	24.1164	1.66e-05	0.000444365	DOWN
ENSG00000165973	NELL1	-3.10915	-3.40996	24.0885	1.67e-05	0.000444365	DOWN
ENSG00000150394	CDH8	-2.42797	-0.502057	24.0922	1.68e-05	0.000446369	DOWN
ENSG00000214717	ZBED1	0.438525	6.02842	24.0613	1.68e-05	0.000447144	NO
ENSG00000108932	SLC16A6	1.01271	7.91204	24.0557	1.7e-05	0.000450285	NO
ENSG00000100234	TIMP3	0.8236	9.13275	24.0359	1.7e-05	0.000450285	NO
ENSG00000100842	EFS	-1.11304	1.72085	24.0227	1.7e-05	0.000451027	NO
ENSG00000139880	CDH24	-1.1397	1.50846	24.0122	1.71e-05	0.000451802	NO
ENSG00000068366	ACSL4	1.085	8.40546	24.032	1.71e-05	0.000451802	NO
ENSG00000224791	KRT18P39	-1.48994	-1.36386	24.004	1.71e-05	0.000451802	NO
ENSG00000189410	SH2D5	-1.43206	0.829498	24.0019	1.71e-05	0.000451802	NO
ENSG00000143036	SLC44A3	-1.54755	-0.414549	23.9957	1.72e-05	0.000452141	DOWN
ENSG00000249244	AC110373.1	1.05479	-0.813293	23.9753	1.73e-05	0.000454226	NO
ENSG00000270069	MIR222HG	1.01698	3.15277	23.9729	1.73e-05	0.000454226	NO
ENSG00000165929	TC2N	-2.4045	-1.43918	23.9831	1.73e-05	0.000454226	DOWN
ENSG00000181143	MUC16	-2.90698	4.46072	23.9479	1.76e-05	0.000460436	DOWN
ENSG00000157538	VPS26C	0.370674	6.54998	23.8884	1.78e-05	0.000464953	NO
ENSG00000215333	KRT18P23	-1.62362	-2.5752	23.8859	1.78e-05	0.000464953	DOWN
ENSG00000164485	IL22RA2	1.52884	-0.219161	23.8707	1.79e-05	0.000466653	UP
ENSG00000240891	PLCXD2	-1.46872	0.544462	23.8667	1.79e-05	0.000466681	NO
ENSG00000149131	SERPING1	-0.688044	4.31318	23.8513	1.8e-05	0.000468431	NO
ENSG00000132561	MATN2	-0.926276	4.36361	23.8216	1.82e-05	0.000474347	NO
ENSG00000087884	AAMDC	-0.337373	2.66679	23.7987	1.83e-05	0.000474917	NO
ENSG00000124613	ZNF391	-0.655916	1.59721	23.7973	1.83e-05	0.000474917	NO
ENSG00000109861	CTSC	0.626285	9.94572	23.7642	1.85e-05	0.000479437	NO
ENSG00000224137	LINC01857	0.926539	0.833701	23.7422	1.86e-05	0.000482257	NO
ENSG00000105698	USF2	0.365143	6.62841	23.7222	1.87e-05	0.000484787	NO
ENSG00000271216	LINC01050	1.90425	-1.79781	23.6995	1.89e-05	0.000487687	UP
ENSG00000136167	LCP1	0.607288	10.1511	23.6922	1.89e-05	0.000487687	NO
ENSG00000143119	CD53	0.453153	8.66025	23.6901	1.89e-05	0.000487687	NO
ENSG00000166377	ATP9B	0.443029	5.55168	23.6888	1.9e-05	0.000487687	NO
ENSG00000079257	LXN	0.655133	3.36117	23.676	1.9e-05	0.000489105	NO
ENSG00000149809	TM7SF2	-0.855022	1.80138	23.6695	1.91e-05	0.000489554	NO
ENSG00000065154	OAT	0.292095	6.86	23.6623	1.91e-05	0.000490091	NO
ENSG00000158856	DMTN	-1.45965	-1.52961	23.6462	1.92e-05	0.00049207	NO
ENSG00000128739	SNRPN	-0.545603	3.31092	23.6377	1.93e-05	0.000492824	NO
ENSG00000127955	GNAI1	-0.654474	2.87648	23.6222	1.94e-05	0.000494708	NO
ENSG00000007952	NOX1	1.82922	-1.78928	23.6131	1.94e-05	0.000495066	UP
ENSG00000163827	LRRC2	-1.10717	-0.739925	23.6126	1.94e-05	0.000495066	NO
ENSG00000008118	CAMK1G	1.0904	0.713603	23.5894	1.96e-05	0.000498196	NO
ENSG00000137101	CD72	0.921026	0.0353482	23.5621	1.97e-05	0.00050202	NO
ENSG00000142273	CBLC	-2.49136	-2.42937	23.5479	1.98e-05	0.000503727	DOWN
ENSG00000240771	ARHGEF25	-0.913143	0.987446	23.5339	1.99e-05	0.000505413	NO
ENSG00000162836	ACP6	-0.948348	2.40859	23.5258	2e-05	0.000506132	NO
ENSG00000117592	PRDX6	-0.326913	7.78118	23.5118	2.01e-05	0.000507826	NO
ENSG00000115590	IL1R2	0.927152	1.11955	23.495	2.02e-05	0.000509997	NO
ENSG00000259471	LINC01169	0.998304	-1.04343	23.4733	2.03e-05	0.000512985	NO
ENSG00000227372	TP73-AS1	-0.337319	4.04928	23.4299	2.06e-05	0.000519656	NO
ENSG00000189308	LIN54	0.493919	4.43272	23.3978	2.08e-05	0.000524368	NO
ENSG00000090097	PCBP4	-0.677989	3.70259	23.3948	2.08e-05	0.000524368	NO
ENSG00000102890	ELMO3	-0.818905	-0.2174	23.3807	2.09e-05	0.000525329	NO
ENSG00000188738	FSIP2	-2.07236	-1.77083	23.3783	2.1e-05	0.000525329	DOWN
ENSG00000242516	LINC00960	-0.736818	0.302513	23.3782	2.1e-05	0.000525329	NO
ENSG00000136689	IL1RN	1.70928	6.62746	23.383	2.11e-05	0.000527827	UP
ENSG00000175606	TMEM70	0.416548	4.59426	23.313	2.14e-05	0.000535316	NO
ENSG00000167779	IGFBP6	0.884169	1.63964	23.2154	2.21e-05	0.000551958	NO
ENSG00000105290	APLP1	-1.64597	2.63118	23.216	2.23e-05	0.000555294	DOWN
ENSG00000147036	LANCL3	1.27356	0.211919	23.1771	2.24e-05	0.000557572	NO
ENSG00000115762	PLEKHB2	0.389448	8.62877	23.1705	2.24e-05	0.00055813	NO
ENSG00000171291	ZNF439	-2.78572	-1.58351	23.1694	2.25e-05	0.000560489	DOWN
ENSG00000046604	DSG2	-1.0357	5.3177	23.1082	2.3e-05	0.000572435	NO
ENSG00000165185	KIAA1958	-0.59857	2.25777	23.0774	2.31e-05	0.000572791	NO
ENSG00000163466	ARPC2	0.328619	9.41778	23.0767	2.31e-05	0.000572791	NO
ENSG00000177494	ZBED2	-3.02473	-0.447758	23.0942	2.32e-05	0.000573061	DOWN
ENSG00000152056	AP1S3	-0.764299	1.36038	23.0604	2.32e-05	0.000574222	NO
ENSG00000185640	KRT79	1.23642	-0.416711	23.0584	2.33e-05	0.000574222	NO
ENSG00000075303	SLC25A40	0.650329	4.10087	23.0277	2.35e-05	0.000579325	NO
ENSG00000176749	CDK5R1	-0.979564	0.981237	23.0006	2.37e-05	0.000583092	NO
ENSG00000151364	KCTD14	-1.06228	-0.88492	22.9982	2.37e-05	0.000583092	NO
ENSG00000164659	KIAA1324L	-0.793231	2.35507	22.9973	2.37e-05	0.000583092	NO
ENSG00000137449	CPEB2	0.508272	5.0247	22.9727	2.39e-05	0.000587133	NO
ENSG00000083223	ZCCHC6	0.523136	5.51132	22.9585	2.4e-05	0.000589182	NO
ENSG00000121898	CPXM2	-2.01698	1.02433	22.966	2.41e-05	0.000591352	DOWN
ENSG00000108788	MLX	0.312887	5.97708	22.8866	2.46e-05	0.000601832	NO
ENSG00000254337	AC083967.1	2.12033	-0.812	22.8926	2.47e-05	0.000602618	UP
ENSG00000161896	IP6K3	-1.12692	-1.11448	22.8678	2.48e-05	0.000604164	NO
ENSG00000165688	PMPCA	-0.258207	5.42979	22.8373	2.5e-05	0.000609529	NO
ENSG00000117245	KIF17	0.838727	2.16122	22.8244	2.51e-05	0.000611351	NO
ENSG00000136114	THSD1	-0.815516	0.590579	22.8212	2.51e-05	0.000611351	NO
ENSG00000129946	SHC2	-1.36362	0.35157	22.8147	2.52e-05	0.000611956	NO
ENSG00000171219	CDC42BPG	-2.35004	-0.0488954	22.7834	2.56e-05	0.000622042	DOWN
ENSG00000102409	BEX4	0.686406	6.23939	22.7552	2.57e-05	0.00062261	NO
ENSG00000176092	CRYBG2	-2.43036	-0.0845868	22.7707	2.57e-05	0.000623219	DOWN
ENSG00000174792	ODAPH	-1.67829	3.9005	22.7559	2.59e-05	0.000625529	DOWN
ENSG00000224596	ZMIZ1-AS1	1.28064	4.40952	22.7451	2.6e-05	0.000627035	NO
ENSG00000178761	FAM219B	-0.387712	5.24445	22.6971	2.62e-05	0.000631728	NO
ENSG00000242615	AC022415.1	-0.918572	-1.47067	22.6868	2.63e-05	0.000633162	NO
ENSG00000128656	CHN1	-0.630694	3.90298	22.6769	2.64e-05	0.000633973	NO
ENSG00000231312	AC007388.1	0.492634	2.92639	22.6752	2.64e-05	0.000633973	NO
ENSG00000142669	SH3BGRL3	0.457905	9.29436	22.6695	2.64e-05	0.000633973	NO
ENSG00000006740	ARHGAP44	-1.25251	-0.113541	22.6692	2.64e-05	0.000633973	NO
ENSG00000142552	RCN3	-0.787178	4.59458	22.661	2.65e-05	0.000634954	NO
ENSG00000231924	PSG1	-3.01809	-2.74597	22.6528	2.66e-05	0.000635327	DOWN
ENSG00000116266	STXBP3	0.372489	5.41365	22.6509	2.66e-05	0.000635327	NO
ENSG00000132470	ITGB4	-2.69917	3.57552	22.6708	2.66e-05	0.000635327	DOWN
ENSG00000133138	TBC1D8B	0.982294	3.0739	22.6437	2.67e-05	0.000636014	NO
ENSG00000023330	ALAS1	0.385013	6.59572	22.6333	2.67e-05	0.000637198	NO
ENSG00000278540	ACACA	-0.50436	5.35336	22.6073	2.7e-05	0.000641947	NO
ENSG00000154358	OBSCN	-1.00627	2.246	22.5834	2.72e-05	0.000646303	NO
ENSG00000056291	NPFFR2	-1.73995	-0.748073	22.5656	2.73e-05	0.000649364	DOWN
ENSG00000249673	NOP14-AS1	-0.388146	2.63451	22.5554	2.74e-05	0.000650721	NO
ENSG00000243317	STMP1	0.257148	5.423	22.5526	2.75e-05	0.000650721	NO
ENSG00000049283	EPN3	-2.43628	-2.46225	22.5457	2.75e-05	0.000651458	DOWN
ENSG00000103202	NME4	-0.431653	5.56677	22.5344	2.76e-05	0.000653177	NO
ENSG00000160791	CCR5	1.02195	6.60477	22.5338	2.78e-05	0.000657231	NO
ENSG00000167077	MEI1	0.717469	2.0507	22.4997	2.79e-05	0.000659232	NO
ENSG00000147724	FAM135B	1.9719	-0.273596	22.4369	2.86e-05	0.000675193	UP
ENSG00000203710	CR1	1.14853	5.28007	22.4357	2.87e-05	0.00067657	NO
ENSG00000228566	AC022387.1	1.66255	-1.51148	22.3775	2.91e-05	0.000683707	UP
ENSG00000161714	PLCD3	-0.928291	3.87933	22.3856	2.91e-05	0.000683707	NO
ENSG00000071054	MAP4K4	-0.378724	7.85644	22.3285	2.96e-05	0.000693693	NO
ENSG00000002549	LAP3	0.397421	6.98895	22.3254	2.96e-05	0.000693693	NO
ENSG00000145362	ANK2	0.562717	4.91064	22.3191	2.97e-05	0.000694366	NO
ENSG00000186470	BTN3A2	0.625352	3.39398	22.2843	3e-05	0.000701098	NO
ENSG00000099219	ERMP1	0.566477	5.22261	22.2829	3e-05	0.000701098	NO
ENSG00000134202	GSTM3	-0.303323	4.8575	22.28	3e-05	0.000701098	NO
ENSG00000231074	HCG18	-0.231039	4.34472	22.2703	3.01e-05	0.000702586	NO
ENSG00000130592	LSP1	0.657533	5.74959	22.2647	3.02e-05	0.000703133	NO
ENSG00000184500	PROS1	0.58465	5.76946	22.2514	3.03e-05	0.000705461	NO
ENSG00000258405	ZNF578	-3.99476	-1.30506	22.2518	3.05e-05	0.000709517	DOWN
ENSG00000148399	DPH7	-0.346638	3.1707	22.212	3.07e-05	0.000712655	NO
ENSG00000183111	ARHGEF37	-1.45589	0.46753	22.2109	3.07e-05	0.000712655	NO
ENSG00000173715	C11orf80	-0.550584	2.3734	22.2054	3.08e-05	0.000713184	NO
ENSG00000234380	LINC01426	0.752427	0.840604	22.1182	3.17e-05	0.000732228	NO
ENSG00000131797	CLUHP3	-0.83795	0.740058	22.1157	3.17e-05	0.000732228	NO
ENSG00000162775	RBM15	0.26658	3.77665	22.1151	3.17e-05	0.000732228	NO
ENSG00000134323	MYCN	-2.53985	-1.11493	22.1315	3.18e-05	0.000732228	DOWN
ENSG00000115758	ODC1	-0.591731	6.68882	22.1061	3.18e-05	0.000733083	NO
ENSG00000069509	FUNDC1	0.863283	3.61567	22.1012	3.19e-05	0.000733502	NO
ENSG00000108688	CCL7	2.46335	4.08175	22.1093	3.2e-05	0.000735413	UP
ENSG00000100918	REC8	-1.73629	2.30448	22.1076	3.2e-05	0.000735413	DOWN
ENSG00000079459	FDFT1	-0.359253	5.56806	22.0792	3.21e-05	0.000735775	NO
ENSG00000233397	AC008063.2	1.66474	-2.70539	22.0789	3.21e-05	0.000735775	UP
ENSG00000127507	ADGRE2	0.409866	7.37916	22.0586	3.23e-05	0.0007393	NO
ENSG00000273328	AC099329.2	-2.12833	-2.9492	22.0541	3.24e-05	0.0007393	DOWN
ENSG00000107020	PLGRKT	0.296676	3.93799	22.0523	3.24e-05	0.0007393	NO
ENSG00000060971	ACAA1	0.361339	5.72394	22.0498	3.24e-05	0.0007393	NO
ENSG00000109854	HTATIP2	0.444818	5.58925	22.0476	3.24e-05	0.0007393	NO
ENSG00000130787	HIP1R	-1.28186	1.79397	22.0508	3.25e-05	0.0007393	NO
ENSG00000162366	PDZK1IP1	0.828204	1.88806	22.0173	3.28e-05	0.000745397	NO
ENSG00000078319	PMS2P1	-0.332411	2.51157	21.9802	3.32e-05	0.000753848	NO
ENSG00000231811	AL159166.1	2.47406	-1.81433	21.9862	3.32e-05	0.000754351	UP
ENSG00000170214	ADRA1B	-1.83568	-0.144508	21.9766	3.33e-05	0.000755967	DOWN
ENSG00000101104	PABPC1L	-0.472006	2.53369	21.9576	3.34e-05	0.000756998	NO
ENSG00000070159	PTPN3	-0.904655	1.40431	21.9549	3.35e-05	0.000756998	NO
ENSG00000213866	YBX1P10	0.338273	3.48574	21.9261	3.38e-05	0.000763471	NO
ENSG00000218416	AC110619.1	-2.62721	-0.309416	21.9251	3.4e-05	0.000767796	DOWN
ENSG00000105131	EPHX3	-1.34635	-1.9861	21.9028	3.41e-05	0.000767796	NO
ENSG00000235770	LINC00607	1.65018	-1.25294	21.8764	3.44e-05	0.00077377	UP
ENSG00000246363	LINC02458	2.73581	-2.42039	21.847	3.47e-05	0.000781051	UP
ENSG00000198915	RASGEF1A	-0.765817	0.187431	21.8337	3.48e-05	0.000783217	NO
ENSG00000167775	CD320	-0.880047	2.72482	21.828	3.49e-05	0.00078388	NO
ENSG00000083544	TDRD3	0.383951	3.24074	21.8221	3.5e-05	0.000784598	NO
ENSG00000226762	AL451164.1	-3.30278	-3.19186	21.8013	3.52e-05	0.000789255	DOWN
ENSG00000212907	MT-ND4L	0.319937	10.2003	21.7937	3.53e-05	0.000790408	NO
ENSG00000124143	ARHGAP40	-2.18965	-2.25946	21.7819	3.55e-05	0.000792702	DOWN
ENSG00000149527	PLCH2	-1.68682	-2.47719	21.7688	3.56e-05	0.000795341	DOWN
ENSG00000269446	AC006967.3	1.54393	-1.45961	21.7511	3.58e-05	0.000799245	UP
ENSG00000248187	AC078850.1	1.32921	2.25346	21.7475	3.6e-05	0.000802664	NO
ENSG00000104324	CPQ	0.529697	5.97794	21.7273	3.61e-05	0.000803936	NO
ENSG00000166946	CCNDBP1	0.406187	5.22881	21.7218	3.62e-05	0.000804578	NO
ENSG00000166206	GABRB3	-1.29081	1.67911	21.7014	3.65e-05	0.000810649	NO
ENSG00000066248	NGEF	-1.57885	-1.58461	21.6914	3.65e-05	0.000811119	DOWN
ENSG00000178177	LCORL	0.480217	3.78811	21.6441	3.71e-05	0.000823184	NO
ENSG00000188130	MAPK12	-0.620538	3.12706	21.6388	3.72e-05	0.00082381	NO
ENSG00000111669	TPI1	0.280139	8.98101	21.6111	3.75e-05	0.000830103	NO
ENSG00000172403	SYNPO2	-1.40602	1.98565	21.622	3.76e-05	0.000830103	NO
ENSG00000136868	SLC31A1	0.540396	7.45052	21.5923	3.78e-05	0.000834129	NO
ENSG00000249158	PCDHA11	-2.4728	-1.76089	21.5804	3.81e-05	0.000839689	DOWN
ENSG00000135253	KCP	0.936223	2.59744	21.5633	3.81e-05	0.000840556	NO
ENSG00000162407	PLPP3	0.945977	3.08952	21.5446	3.84e-05	0.000844968	NO
ENSG00000178187	ZNF454	-3.0067	-2.21553	21.5491	3.85e-05	0.000846245	DOWN
ENSG00000104267	CA2	1.16954	4.6686	21.4633	3.97e-05	0.000872326	NO
ENSG00000119938	PPP1R3C	-1.35733	2.04423	21.4324	4e-05	0.000878251	NO
ENSG00000213763	ACTBP2	0.421906	3.913	21.3701	4.07e-05	0.000892307	NO
ENSG00000267260	AC020928.2	-2.25697	-2.69609	21.3652	4.08e-05	0.000892877	DOWN
ENSG00000276758	AC245884.12	0.899088	-0.101749	21.3572	4.09e-05	0.000894362	NO
ENSG00000169105	CHST14	-0.328222	3.85264	21.3169	4.14e-05	0.000905662	NO
ENSG00000145358	DDIT4L	1.1466	8.24319	21.3276	4.16e-05	0.000906944	NO
ENSG00000176485	PLA2G16	0.714264	2.68773	21.3066	4.16e-05	0.000906944	NO
ENSG00000164220	F2RL2	-0.620604	3.49256	21.3023	4.16e-05	0.000907337	NO
ENSG00000169084	DHRSX	0.395762	5.00436	21.294	4.18e-05	0.000908253	NO
ENSG00000151612	ZNF827	-0.795884	3.28539	21.2932	4.18e-05	0.000908253	NO
ENSG00000273341	AC004921.1	0.813679	1.06588	21.2813	4.19e-05	0.000910972	NO
ENSG00000157514	TSC22D3	0.740033	4.55256	21.2772	4.2e-05	0.000911323	NO
ENSG00000164096	C4orf3	0.332287	6.27839	21.2721	4.21e-05	0.00091196	NO
ENSG00000126947	ARMCX1	0.410503	3.95816	21.2495	4.24e-05	0.000917984	NO
ENSG00000165782	PIP4P1	0.396441	4.99337	21.2458	4.24e-05	0.000918199	NO
ENSG00000183287	CCBE1	1.05086	2.68594	21.222	4.28e-05	0.000925506	NO
ENSG00000116774	OLFML3	-0.489125	5.13366	21.2154	4.29e-05	0.000925811	NO
ENSG00000148426	PROSER2	-0.962234	1.61311	21.1841	4.33e-05	0.000934076	NO
ENSG00000134531	EMP1	0.553616	8.55594	21.183	4.34e-05	0.000934076	NO
ENSG00000260401	AP002761.4	-1.82139	-1.444	21.1697	4.36e-05	0.000937351	DOWN
ENSG00000170571	EMB	-0.891109	2.50742	21.1647	4.36e-05	0.000937988	NO
ENSG00000237125	HAND2-AS1	-1.11877	1.47794	21.1617	4.37e-05	0.000937995	NO
ENSG00000109321	AREG	-1.42612	1.76767	21.1642	4.38e-05	0.000939966	NO
ENSG00000087077	TRIP6	-0.590158	4.13468	21.1436	4.39e-05	0.000941619	NO
ENSG00000162374	ELAVL4	-0.94809	0.590732	21.1412	4.4e-05	0.000941619	NO
ENSG00000018869	ZNF582	-0.696937	0.79066	21.1382	4.4e-05	0.000941619	NO
ENSG00000236609	ZNF853	-1.21905	0.917616	21.1354	4.41e-05	0.000941619	NO
ENSG00000175183	CSRP2	-0.982885	4.04936	21.1393	4.42e-05	0.000942133	NO
ENSG00000100302	RASD2	1.28727	-0.67086	21.1256	4.42e-05	0.000942133	NO
ENSG00000178252	WDR6	-0.383845	6.06335	21.1249	4.42e-05	0.000942133	NO
ENSG00000133110	POSTN	0.920187	7.90922	21.1213	4.45e-05	0.000946332	NO
ENSG00000004660	CAMKK1	0.416825	3.97589	21.1007	4.46e-05	0.000947981	NO
ENSG00000229613	LINC01501	-1.3896	-1.67081	21.0923	4.47e-05	0.000949722	NO
ENSG00000168743	NPNT	-3.25127	1.50147	21.0634	4.54e-05	0.000964298	DOWN
ENSG00000118515	SGK1	0.489817	8.16761	21.0181	4.58e-05	0.000971957	NO
ENSG00000242841	KRT8P35	-1.11483	-1.94849	21.0107	4.6e-05	0.000973424	NO
ENSG00000166173	LARP6	-0.462534	3.3997	21.002	4.61e-05	0.000973925	NO
ENSG00000214012	KRT18P38	-1.40146	-1.57248	21.001	4.61e-05	0.000973925	NO
ENSG00000234335	RPS4XP11	0.836294	-0.61463	21.0004	4.61e-05	0.000973925	NO
ENSG00000105464	GRIN2D	1.10825	4.59371	21.006	4.63e-05	0.000977354	NO
ENSG00000163624	CDS1	-0.775356	1.93856	20.9685	4.66e-05	0.000981873	NO
ENSG00000073670	ADAM11	-1.59358	-1.9534	20.9677	4.66e-05	0.000981873	DOWN
ENSG00000079385	CEACAM1	-1.3094	-0.526208	20.9576	4.68e-05	0.00098427	NO
ENSG00000228623	ZNF883	-1.39735	-1.88503	20.9508	4.69e-05	0.000985571	NO
ENSG00000130768	SMPDL3B	-3.14143	-2.33564	20.9377	4.73e-05	0.000992842	DOWN
ENSG00000261040	WFDC21P	1.95551	4.335	20.9243	4.76e-05	0.000998875	UP
ENSG00000196141	SPATS2L	-0.395254	6.19065	20.8988	4.77e-05	0.000999839	NO
ENSG00000058866	DGKG	0.798916	1.67747	20.8942	4.78e-05	0.000999839	NO
ENSG00000268858	AL118506.1	0.454236	3.56263	20.8939	4.78e-05	0.000999839	NO
ENSG00000152595	MEPE	3.98304	0.545915	20.899	4.8e-05	0.0010034	UP
ENSG00000178826	TMEM139	-2.97965	-1.22842	20.8965	4.81e-05	0.0010034	DOWN
ENSG00000144959	NCEH1	0.622558	7.9309	20.8641	4.83e-05	0.00100704	NO
ENSG00000186493	C5orf38	2.73617	-3.33998	20.8419	4.87e-05	0.00101284	UP
ENSG00000138678	GPAT3	1.37203	4.48482	20.8602	4.87e-05	0.00101284	NO
ENSG00000047648	ARHGAP6	1.07046	3.9639	20.8302	4.91e-05	0.00102074	NO
ENSG00000227706	AL713998.1	1.52172	-1.26533	20.8129	4.91e-05	0.00102074	UP
ENSG00000104415	WISP1	1.51621	0.535614	20.8113	4.93e-05	0.00102206	UP
ENSG00000057294	PKP2	-0.841263	3.18273	20.7809	4.97e-05	0.00102991	NO
ENSG00000166926	MS4A6E	1.65457	-0.244848	20.7699	4.99e-05	0.00103422	UP
ENSG00000135940	COX5B	0.302789	5.38692	20.7521	5.02e-05	0.00103802	NO
ENSG00000141750	STAC2	2.47756	-0.135265	20.7587	5.04e-05	0.00104126	UP
ENSG00000185972	CCIN	1.23525	-2.31693	20.705	5.1e-05	0.00105279	NO
ENSG00000114480	GBE1	0.31506	5.67548	20.7001	5.11e-05	0.00105353	NO
ENSG00000256771	ZNF253	-0.61619	1.89152	20.6959	5.11e-05	0.001054	NO
ENSG00000184731	FAM110C	-3.0094	-1.54988	20.7019	5.14e-05	0.00105748	DOWN
ENSG00000105835	NAMPT	0.969262	9.91967	20.6955	5.14e-05	0.00105794	NO
ENSG00000189159	JPT1	-0.327987	6.16889	20.6544	5.19e-05	0.00106595	NO
ENSG00000259146	AC005476.2	-1.01693	-1.54095	20.6189	5.25e-05	0.00107787	NO
ENSG00000128595	CALU	0.284291	9.28315	20.6094	5.27e-05	0.00108036	NO
ENSG00000167419	LPO	2.4249	-2.01931	20.6009	5.28e-05	0.00108281	UP
ENSG00000251429	AC098679.2	0.86571	0.461434	20.5938	5.3e-05	0.00108403	NO
ENSG00000088992	TESC	-0.643716	4.314	20.587	5.31e-05	0.00108551	NO
ENSG00000090376	IRAK3	0.655796	6.21714	20.5726	5.33e-05	0.00108955	NO
ENSG00000125735	TNFSF14	2.56918	0.717098	20.5888	5.34e-05	0.00108955	UP
ENSG00000276168	RN7SL1	0.522909	2.51585	20.5597	5.36e-05	0.00109251	NO
ENSG00000253978	AC008637.1	1.8824	-3.11881	20.5454	5.38e-05	0.00109682	UP
ENSG00000154655	L3MBTL4	0.833859	-0.167931	20.5375	5.4e-05	0.00109874	NO
ENSG00000205710	C17orf107	-1.15342	-0.131028	20.534	5.41e-05	0.00109901	NO
ENSG00000122958	VPS26A	0.406131	6.60737	20.5303	5.41e-05	0.00109934	NO
ENSG00000114166	KAT2B	0.47673	4.82069	20.5276	5.42e-05	0.00109934	NO
ENSG00000175806	MSRA	0.294144	4.38568	20.515	5.44e-05	0.00110303	NO
ENSG00000232445	AC006329.1	-1.24515	-0.796525	20.502	5.46e-05	0.0011063	NO
ENSG00000272398	CD24	-2.29084	4.17257	20.5189	5.47e-05	0.0011063	DOWN
ENSG00000225826	LINC00626	2.90512	-2.61856	20.4916	5.49e-05	0.00110968	UP
ENSG00000139173	TMEM117	0.466937	3.76724	20.4755	5.51e-05	0.0011138	NO
ENSG00000148948	LRRC4C	-1.31285	-0.515084	20.4641	5.54e-05	0.00111708	NO
ENSG00000161249	DMKN	-1.99634	1.10059	20.4752	5.55e-05	0.00111868	DOWN
ENSG00000164185	ZNF474	-1.16746	-1.5123	20.4526	5.56e-05	0.00111938	NO
ENSG00000212864	RNF208	-1.10535	-0.190275	20.4491	5.56e-05	0.00111967	NO
ENSG00000173402	DAG1	-0.307598	6.0103	20.43	5.6e-05	0.00112594	NO
ENSG00000196569	LAMA2	-0.818658	4.8989	20.4357	5.61e-05	0.00112649	NO
ENSG00000148841	ITPRIP	0.336107	6.51318	20.4192	5.62e-05	0.00112798	NO
ENSG00000198938	MT-CO3	0.280801	12.5339	20.4051	5.65e-05	0.00113237	NO
ENSG00000173559	NABP1	0.664592	8.25972	20.3827	5.69e-05	0.00114004	NO
ENSG00000166347	CYB5A	0.381958	4.16252	20.368	5.72e-05	0.00114472	NO
ENSG00000204963	PCDHA7	-1.63273	-2.68734	20.2735	5.91e-05	0.00118136	DOWN
ENSG00000260597	AC012531.1	-1.10891	-0.43143	20.2698	5.92e-05	0.00118174	NO
ENSG00000108352	RAPGEFL1	-0.597584	1.14988	20.2653	5.93e-05	0.00118245	NO
ENSG00000167644	C19orf33	-2.67441	-3.32719	20.2512	5.96e-05	0.0011864	DOWN
ENSG00000144476	ACKR3	-1.71242	2.68262	20.2661	5.96e-05	0.0011864	DOWN
ENSG00000150540	HNMT	0.586328	6.58856	20.2475	5.96e-05	0.0011864	NO
ENSG00000136895	GARNL3	-1.12326	0.440943	20.2416	5.98e-05	0.00118767	NO
ENSG00000087303	NID2	0.837685	4.66338	20.224	6.03e-05	0.00119775	NO
ENSG00000137573	SULF1	0.587868	6.70668	20.1934	6.08e-05	0.00120509	NO
ENSG00000284690	AC079325.2	0.846245	-0.117026	20.1912	6.08e-05	0.00120509	NO
ENSG00000168621	GDNF	-0.675364	2.31918	20.18	6.1e-05	0.00120859	NO
ENSG00000165695	AK8	1.14587	-0.074778	20.152	6.16e-05	0.00121918	NO
ENSG00000171316	CHD7	-0.317565	5.36437	20.1459	6.18e-05	0.00122063	NO
ENSG00000169908	TM4SF1	-0.909992	4.25964	20.1492	6.19e-05	0.00122261	NO
ENSG00000279227	AC009303.4	0.64618	0.762739	20.1299	6.21e-05	0.0012251	NO
ENSG00000102225	CDK16	0.386814	6.87832	20.1201	6.23e-05	0.00122809	NO
ENSG00000072694	FCGR2B	2.46273	2.62444	20.1216	6.26e-05	0.00123372	UP
ENSG00000242474	AC093627.5	-0.716412	-1.02094	20.0933	6.29e-05	0.00123717	NO
ENSG00000141741	MIEN1	0.254604	4.70842	20.0778	6.32e-05	0.00124267	NO
ENSG00000164683	HEY1	1.24563	4.91317	20.0923	6.33e-05	0.00124279	NO
ENSG00000156414	TDRD9	2.2236	-2.32979	20.0652	6.35e-05	0.0012458	UP
ENSG00000188921	HACD4	0.716085	2.77377	20.0383	6.41e-05	0.00125625	NO
ENSG00000198028	ZNF560	-4.97237	-3.34687	20.0368	6.43e-05	0.00125927	DOWN
ENSG00000039319	ZFYVE16	0.753918	6.96384	20.0337	6.44e-05	0.00125927	NO
ENSG00000205978	NYNRIN	-1.29817	2.24495	20.0298	6.45e-05	0.00126106	NO
ENSG00000160593	JAML	0.972035	2.54214	20.008	6.48e-05	0.00126481	NO
ENSG00000136244	IL6	2.51772	8.91334	20.0223	6.48e-05	0.00126495	UP
ENSG00000161647	MPP3	-0.468308	1.75014	19.9879	6.52e-05	0.00127127	NO
ENSG00000155622	XAGE2	-3.18381	-0.467875	19.9826	6.57e-05	0.00127944	DOWN
ENSG00000235106	BRD3OS	-0.347939	3.24211	19.9641	6.57e-05	0.00127944	NO
ENSG00000140284	SLC27A2	-1.05718	-0.801294	19.9565	6.59e-05	0.00128164	NO
ENSG00000188511	C22orf34	2.42143	-3.33557	19.9473	6.61e-05	0.00128454	UP
ENSG00000135047	CTSL	0.527171	11.0089	19.9432	6.62e-05	0.0012852	NO
ENSG00000204650	LINC02210	-1.082	0.87381	19.9303	6.65e-05	0.00128977	NO
ENSG00000210082	MT-RNR2	0.335838	12.485	19.9192	6.68e-05	0.00129305	NO
ENSG00000167748	KLK1	1.92101	-0.737517	19.9282	6.68e-05	0.00129305	UP
ENSG00000187630	DHRS4L2	0.344027	3.77644	19.9142	6.69e-05	0.00129343	NO
ENSG00000171714	ANO5	-1.58856	0.468596	19.9034	6.74e-05	0.00130132	DOWN
ENSG00000269893	SNHG8	-0.372579	3.18251	19.8823	6.76e-05	0.00130539	NO
ENSG00000123562	MORF4L2	0.560047	7.85496	19.8655	6.8e-05	0.00131184	NO
ENSG00000185101	ANO9	-2.28087	-1.86354	19.8401	6.87e-05	0.00132292	DOWN
ENSG00000214189	ZNF788	-1.20926	-2.03395	19.8334	6.88e-05	0.0013239	NO
ENSG00000156298	TSPAN7	0.787668	0.514143	19.8312	6.88e-05	0.0013239	NO
ENSG00000134258	VTCN1	-3.00874	1.48703	19.8323	6.92e-05	0.00133003	DOWN
ENSG00000125726	CD70	1.37342	0.0832808	19.8114	6.93e-05	0.00133062	NO
ENSG00000211452	DIO1	1.31403	-1.23488	19.7716	7.03e-05	0.00134789	NO
ENSG00000203747	FCGR3A	0.709973	9.08626	19.7461	7.09e-05	0.00135766	NO
ENSG00000165105	RASEF	-1.67053	-0.733273	19.7469	7.09e-05	0.00135766	DOWN
ENSG00000276023	DUSP14	-0.469552	4.18931	19.7288	7.13e-05	0.00136438	NO
ENSG00000149212	SESN3	-1.3784	3.48731	19.7191	7.2e-05	0.00137577	NO
ENSG00000132763	MMACHC	-0.612074	1.59769	19.696	7.21e-05	0.00137753	NO
ENSG00000149573	MPZL2	-2.74021	0.738575	19.6842	7.29e-05	0.00139004	DOWN
ENSG00000106236	NPTX2	0.947069	2.39342	19.6506	7.33e-05	0.00139696	NO
ENSG00000145604	SKP2	-0.482204	3.56173	19.6436	7.35e-05	0.0013991	NO
ENSG00000240065	PSMB9	0.555834	1.42987	19.6342	7.37e-05	0.00140243	NO
ENSG00000157184	CPT2	0.325926	5.51886	19.629	7.38e-05	0.00140372	NO
ENSG00000109016	DHRS7B	0.310362	3.38268	19.6241	7.4e-05	0.00140486	NO
ENSG00000257727	CNPY2	-0.301948	2.49257	19.6207	7.41e-05	0.00140525	NO
ENSG00000182898	TCHHL1	-6.35239	-1.95231	20.3181	7.43e-05	0.00140763	DOWN
ENSG00000185386	MAPK11	-0.796307	1.97612	19.5672	7.55e-05	0.00142846	NO
ENSG00000141448	GATA6	-0.577813	2.99467	19.566	7.55e-05	0.00142846	NO
ENSG00000225808	DNAJC19P5	1.14079	-0.913383	19.545	7.6e-05	0.00143764	NO
ENSG00000133106	EPSTI1	-0.887747	2.88833	19.5338	7.63e-05	0.00144199	NO
ENSG00000186197	EDARADD	1.98321	-1.05784	19.5357	7.65e-05	0.0014443	UP
ENSG00000281398	SNHG4	-0.442865	3.57283	19.5035	7.71e-05	0.00145472	NO
ENSG00000138741	TRPC3	1.05415	-1.93334	19.4836	7.77e-05	0.00146238	NO
ENSG00000175164	ABO	-1.35515	-1.96956	19.4833	7.77e-05	0.00146238	NO
ENSG00000052344	PRSS8	-2.66111	0.318638	19.4858	7.81e-05	0.00146828	DOWN
ENSG00000100228	RAB36	-0.827373	1.59792	19.4349	7.9e-05	0.00148467	NO
ENSG00000162817	C1orf115	-1.07943	-0.355867	19.398	8e-05	0.0015021	NO
ENSG00000180776	ZDHHC20	0.319915	6.37401	19.3965	8.01e-05	0.0015021	NO
ENSG00000058335	RASGRF1	-1.20827	0.803663	19.3892	8.03e-05	0.00150461	NO
ENSG00000198286	CARD11	-0.663141	2.63061	19.3659	8.09e-05	0.00151555	NO
ENSG00000165355	FBXO33	0.372371	4.48474	19.3508	8.14e-05	0.00152223	NO
ENSG00000130545	CRB3	-2.39091	-2.20391	19.3298	8.2e-05	0.00153275	DOWN
ENSG00000234745	HLA-B	0.484378	9.11387	19.3161	8.24e-05	0.00153812	NO
ENSG00000083307	GRHL2	-3.18483	0.639153	19.3287	8.25e-05	0.00153873	DOWN
ENSG00000143816	WNT9A	-2.20952	0.838362	19.2926	8.35e-05	0.00155633	DOWN
ENSG00000169446	MMGT1	0.834739	5.87815	19.2849	8.36e-05	0.00155633	NO
ENSG00000196381	ZNF781	-1.82848	-2.5082	19.231	8.49e-05	0.0015791	DOWN
ENSG00000181894	ZNF329	-0.500697	3.0508	19.2139	8.54e-05	0.00158721	NO
ENSG00000127252	HRASLS	-1.01903	-0.419813	19.2083	8.55e-05	0.00158895	NO
ENSG00000168952	STXBP6	-0.900466	2.31154	19.1964	8.59e-05	0.00159165	NO
ENSG00000164330	EBF1	2.03746	-0.96139	19.2054	8.59e-05	0.00159165	UP
ENSG00000008300	CELSR3	-0.771566	0.9558	19.195	8.59e-05	0.00159165	NO
ENSG00000111371	SLC38A1	-0.911409	5.61006	19.2078	8.6e-05	0.00159165	NO
ENSG00000130429	ARPC1B	0.438828	4.06642	19.1905	8.61e-05	0.00159198	NO
ENSG00000152076	CCDC74B	-0.748526	-0.336105	19.1821	8.63e-05	0.00159529	NO
ENSG00000226234	KRT18P24	-1.36157	-1.8612	19.1218	8.82e-05	0.00162716	NO
ENSG00000175315	CST6	-2.51081	0.7974	19.1367	8.82e-05	0.00162716	DOWN
ENSG00000204789	ZNF204P	-1.94755	-2.19395	19.1064	8.86e-05	0.00163262	DOWN
ENSG00000184949	FAM227A	-0.887192	-0.58858	19.1063	8.86e-05	0.00163262	NO
ENSG00000134317	GRHL1	-0.748919	1.27599	19.0845	8.93e-05	0.00164375	NO
ENSG00000166311	SMPD1	0.306173	5.72658	19.0655	8.99e-05	0.00165331	NO
ENSG00000234062	AL390879.1	0.657172	-0.511334	19.0571	9.02e-05	0.00165682	NO
ENSG00000130021	PUDP	0.492924	5.15692	19.0333	9.1e-05	0.00166832	NO
ENSG00000170919	TPT1-AS1	-0.45038	2.44243	19.0325	9.1e-05	0.00166832	NO
ENSG00000182583	VCX	2.27034	-1.80726	19.0289	9.14e-05	0.00167405	UP
ENSG00000131368	MRPS25	-0.195549	4.76904	19.0108	9.17e-05	0.0016782	NO
ENSG00000253557	AC100849.1	-1.06292	0.46694	19.0025	9.19e-05	0.00168167	NO
ENSG00000157214	STEAP2	1.58014	-0.728587	18.9971	9.21e-05	0.00168344	UP
ENSG00000127328	RAB3IP	-0.796689	1.97546	18.9872	9.24e-05	0.00168517	NO
ENSG00000151715	TMEM45B	0.944346	3.69756	18.9967	9.24e-05	0.00168517	NO
ENSG00000113441	LNPEP	0.292455	6.03201	18.9869	9.25e-05	0.00168517	NO
ENSG00000137959	IFI44L	-1.81985	0.502787	18.9816	9.31e-05	0.00169508	DOWN
ENSG00000128524	ATP6V1F	0.396137	8.23481	18.9648	9.32e-05	0.00169542	NO
ENSG00000267470	ZNF571-AS1	-2.62414	-3.03021	18.9491	9.37e-05	0.00170338	DOWN
ENSG00000139835	GRTP1	-1.69528	-1.89164	18.9323	9.42e-05	0.00171201	DOWN
ENSG00000079156	OSBPL6	-0.615942	2.34689	18.9282	9.44e-05	0.00171301	NO
ENSG00000124171	PARD6B	-1.29613	-0.276766	18.9113	9.49e-05	0.00172179	NO
ENSG00000175556	LONRF3	1.0995	3.33105	18.8965	9.59e-05	0.0017374	NO
ENSG00000123179	EBPL	-0.392873	2.596	18.8798	9.6e-05	0.00173805	NO
ENSG00000167755	KLK6	-2.93904	2.4929	18.8852	9.64e-05	0.00174286	DOWN
ENSG00000068308	OTUD5	0.55247	5.8886	18.8479	9.71e-05	0.00175477	NO
ENSG00000275234	AC010503.4	-1.98176	-2.66198	18.8421	9.73e-05	0.00175688	DOWN
ENSG00000167642	SPINT2	-0.520762	5.45431	18.8134	9.83e-05	0.00177326	NO
ENSG00000166579	NDEL1	0.226637	5.99363	18.8076	9.85e-05	0.00177543	NO
ENSG00000128422	KRT17	-2.97782	4.27658	18.7947	9.95e-05	0.00179179	DOWN
ENSG00000169992	NLGN2	-0.724023	4.00141	18.7665	9.99e-05	0.00179836	NO
ENSG00000135269	TES	-0.73105	4.6542	18.7627	0.000100107	0.00180006	NO
ENSG00000196208	GREB1	0.530343	3.87924	18.7477	0.000100595	0.00180636	NO
ENSG00000074582	BCS1L	-0.322415	3.3512	18.7468	0.000100626	0.00180636	NO
ENSG00000163251	FZD5	0.504636	3.33275	18.7291	0.000101258	0.00181617	NO
ENSG00000198203	SULT1C2	1.03696	3.96976	18.7261	0.000101855	0.00182534	NO
ENSG00000261210	CLEC19A	0.87366	3.00291	18.7037	0.000102172	0.00182949	NO
ENSG00000057608	GDI2	0.22569	8.32499	18.7001	0.000102301	0.00183025	NO
ENSG00000143158	MPC2	0.340714	4.44626	18.6895	0.000102688	0.00183472	NO
ENSG00000267041	ZNF850	-0.722136	1.72687	18.6885	0.000102723	0.00183472	NO
ENSG00000226383	LINC01876	-1.44708	-1.76591	18.6765	0.000103159	0.00184097	NO
ENSG00000111907	TPD52L1	-1.42247	1.7552	18.6681	0.000103841	0.00185159	NO
ENSG00000137033	IL33	0.913707	2.2211	18.6365	0.000104633	0.00186414	NO
ENSG00000231645	KRT17P6	-2.47426	-3.67368	18.6318	0.000104807	0.00186569	DOWN
ENSG00000012174	MBTPS2	0.359289	5.08839	18.6275	0.000104968	0.00186699	NO
ENSG00000196975	ANXA4	0.498962	6.44115	18.6144	0.000105454	0.00187408	NO
ENSG00000148834	GSTO1	0.350842	7.43211	18.5955	0.000106165	0.00188514	NO
ENSG00000058085	LAMC2	-0.792726	7.57686	18.5995	0.000106362	0.00188575	NO
ENSG00000171812	COL8A2	0.896148	3.18615	18.592	0.000106377	0.00188575	NO
ENSG00000259000	DOCK11P1	1.14534	-1.59809	18.5843	0.000106587	0.0018879	NO
ENSG00000176532	PRR15	-1.7653	-1.68929	18.582	0.000106675	0.0018879	DOWN
ENSG00000099864	PALM	-1.45126	1.86922	18.5927	0.000106775	0.0018881	NO
ENSG00000255399	TBX5-AS1	1.76709	-2.74115	18.5677	0.00010722	0.00189439	UP
ENSG00000135723	FHOD1	-0.636134	5.76469	18.5604	0.000107496	0.00189769	NO
ENSG00000188859	FAM78B	-1.19735	-2.13414	18.5289	0.000108706	0.00191748	NO
ENSG00000147416	ATP6V1B2	0.446804	9.20293	18.5006	0.000109804	0.00193524	NO
ENSG00000187699	C2orf88	1.29992	-2.00053	18.4878	0.000110303	0.00194107	NO
ENSG00000198125	MB	-2.48191	-2.24476	18.4905	0.000110378	0.00194107	DOWN
ENSG00000158806	NPM2	1.03858	0.100765	18.4852	0.000110408	0.00194107	NO
ENSG00000101935	AMMECR1	0.477995	3.70495	18.4697	0.000111016	0.00194897	NO
ENSG00000149428	HYOU1	-0.257971	7.45135	18.4691	0.00011104	0.00194897	NO
ENSG00000178531	CTXN1	-1.68656	0.764096	18.4747	0.000111224	0.00195058	DOWN
ENSG00000260412	AL353746.1	-1.46133	-1.29721	18.4577	0.000111491	0.00195347	NO
ENSG00000169169	CPT1C	-1.5301	1.14332	18.4648	0.000111572	0.00195347	DOWN
ENSG00000017427	IGF1	-2.01051	3.23681	18.4406	0.000112768	0.00197279	DOWN
ENSG00000181085	MAPK15	-2.40293	-1.87184	18.4262	0.000113077	0.00197654	DOWN
ENSG00000132376	INPP5K	0.27992	4.39009	18.4158	0.000113168	0.00197654	NO
ENSG00000121104	FAM117A	-0.675374	0.457508	18.3788	0.000114669	0.00200113	NO
ENSG00000143869	GDF7	-2.75885	-3.07211	18.3659	0.000115194	0.00200864	DOWN
ENSG00000180806	HOXC9	-1.0196	-0.431294	18.3596	0.000115456	0.00201039	NO
ENSG00000124172	ATP5F1E	0.238782	7.36045	18.3583	0.000115508	0.00201039	NO
ENSG00000158106	RHPN1	-1.38016	-1.46705	18.3566	0.000115578	0.00201039	NO
ENSG00000174640	SLCO2A1	-1.37959	3.60671	18.3675	0.00011574	0.00201156	NO
ENSG00000131143	COX4I1	0.222627	7.83865	18.3484	0.000115917	0.00201246	NO
ENSG00000213722	DDAH2	-0.49887	4.46284	18.3469	0.00011598	0.00201246	NO
ENSG00000169884	WNT10B	-1.62614	-2.44556	18.3343	0.0001165	0.00201985	DOWN
ENSG00000135916	ITM2C	-0.736317	5.29747	18.3022	0.000118182	0.00204605	NO
ENSG00000265107	GJA5	-2.23857	1.03132	18.3084	0.000118204	0.00204605	DOWN
ENSG00000172037	LAMB2	-0.420464	6.91509	18.2848	0.000118578	0.00204932	NO
ENSG00000167460	TPM4	0.327358	9.9922	18.2846	0.000118585	0.00204932	NO
ENSG00000172531	PPP1CA	0.21599	7.25617	18.2792	0.000118813	0.00205159	NO
ENSG00000133687	TMTC1	0.893932	3.08596	18.2682	0.000119339	0.00205845	NO
ENSG00000111348	ARHGDIB	0.629956	8.50251	18.2653	0.000119403	0.00205845	NO
ENSG00000264247	LINC00909	-0.383272	2.4078	18.2616	0.000119563	0.00205953	NO
ENSG00000187720	THSD4	-0.454333	4.18823	18.2577	0.000119728	0.00206071	NO
ENSG00000123595	RAB9A	0.473659	4.6039	18.2374	0.000120603	0.0020741	NO
ENSG00000171992	SYNPO	-0.723131	5.15175	18.2402	0.000120744	0.00207486	NO
ENSG00000150722	PPP1R1C	-1.9286	-1.64382	18.2145	0.00012164	0.00208856	DOWN
ENSG00000173548	SNX33	0.347926	5.37285	18.1723	0.00012344	0.00211776	NO
ENSG00000079819	EPB41L2	0.388655	7.36372	18.1628	0.000123859	0.00212324	NO
ENSG00000203797	DDO	1.77164	-3.24374	18.1384	0.000124948	0.00214018	UP
ENSG00000182983	ZNF662	-3.98504	-2.32333	18.1359	0.000125709	0.00215148	DOWN
ENSG00000162739	SLAMF6	1.68732	3.41304	18.1323	0.000125873	0.00215257	UP
ENSG00000226124	FTCDNL1	0.632609	1.35471	18.1139	0.000126049	0.00215385	NO
ENSG00000224078	SNHG14	-0.603438	5.86512	18.0852	0.000127351	0.00217436	NO
ENSG00000175792	RUVBL1	-0.412582	4.67908	18.071	0.000128003	0.00218359	NO
ENSG00000180773	SLC36A4	0.347349	4.71987	18.0689	0.000128097	0.00218359	NO
ENSG00000177410	ZFAS1	-0.268289	3.96889	18.0614	0.000128444	0.00218714	NO
ENSG00000117594	HSD11B1	1.57808	-0.0723465	18.0669	0.00012851	0.00218714	UP
ENSG00000162430	SELENON	0.405054	7.87094	18.0551	0.00012873	0.00218913	NO
ENSG00000203772	SPRN	-1.29375	-0.763091	18.0298	0.000129906	0.00220639	NO
ENSG00000112541	PDE10A	-0.885668	2.94587	18.0288	0.000129952	0.00220639	NO
ENSG00000165300	SLITRK5	-2.27805	-0.00535128	18.0366	0.000130258	0.00220983	DOWN
ENSG00000147231	CXorf57	0.933396	0.999301	18.0195	0.000130385	0.00221022	NO
ENSG00000075292	ZNF638	0.46674	6.04116	18.0168	0.000130513	0.00221064	NO
ENSG00000133315	MACROD1	-0.646558	0.723877	18.0092	0.00013087	0.00221491	NO
ENSG00000071127	WDR1	0.215791	9.31463	18.006	0.000131022	0.00221573	NO
ENSG00000110719	TCIRG1	0.679656	7.07001	17.999	0.000131412	0.00222057	NO
ENSG00000146530	VWDE	-3.14283	-3.32882	17.9926	0.000131651	0.00222134	DOWN
ENSG00000113396	SLC27A6	-2.64113	0.321666	18.0053	0.000131725	0.00222134	DOWN
ENSG00000183876	ARSI	-0.717546	4.28491	17.9896	0.000131793	0.00222134	NO
ENSG00000182195	LDOC1	-5.27504	1.56095	18.0022	0.000131875	0.00222134	DOWN
ENSG00000221818	EBF2	1.96204	-1.34484	17.9874	0.000132269	0.00222622	UP
ENSG00000164761	TNFRSF11B	1.62015	2.34129	17.9625	0.000133764	0.0022496	UP
ENSG00000185652	NTF3	-0.520963	1.17982	17.9262	0.000134831	0.0022646	NO
ENSG00000175287	PHYHD1	-0.858846	0.385538	17.9254	0.000134868	0.0022646	NO
ENSG00000169919	GUSB	0.270107	6.74553	17.9133	0.000135456	0.00227267	NO
ENSG00000166816	LDHD	1.29226	1.19576	17.9101	0.000135875	0.00227791	NO
ENSG00000145979	TBC1D7	0.297913	3.128	17.8964	0.00013628	0.00228291	NO
ENSG00000099377	HSD3B7	0.663309	5.26896	17.8925	0.000136486	0.0022832	NO
ENSG00000198768	APCDD1L	1.15594	1.99936	17.8977	0.0001366	0.0022832	NO
ENSG00000189320	FAM180A	4.08947	-3.01309	17.8982	0.000136619	0.0022832	UP
ENSG00000131941	RHPN2	-1.29179	1.88687	17.892	0.000136924	0.00228651	NO
ENSG00000153485	TMEM251	0.640897	4.47479	17.8737	0.000137402	0.00229269	NO
ENSG00000154153	RETREG1	-1.03699	0.466637	17.8647	0.000137845	0.00229827	NO
ENSG00000230716	KRT8P7	-1.20979	-1.68237	17.8571	0.000138225	0.00230282	NO
ENSG00000134138	MEIS2	-0.732533	3.61079	17.8413	0.000139015	0.00231416	NO
ENSG00000122644	ARL4A	-0.541564	3.36657	17.8331	0.000139421	0.00231868	NO
ENSG00000170456	DENND5B	-0.383136	4.66855	17.8315	0.000139504	0.00231868	NO
ENSG00000129455	KLK8	-2.77748	-3.09488	17.8277	0.000139696	0.00232007	DOWN
ENSG00000116857	TMEM9	-0.36653	4.12261	17.8222	0.00013997	0.0023228	NO
ENSG00000172264	MACROD2	-1.13035	-1.92705	17.8054	0.000140823	0.0023334	NO
ENSG00000167971	CASKIN1	-1.63613	-2.48166	17.8053	0.000140828	0.0023334	DOWN
ENSG00000124785	NRN1	1.19449	3.41942	17.8	0.00014181	0.00234786	NO
ENSG00000177485	ZBTB33	0.972867	4.94098	17.7957	0.00014203	0.00234968	NO
ENSG00000138650	PCDH10	-0.758018	4.94553	17.7813	0.000142443	0.00235468	NO
ENSG00000205336	ADGRG1	-1.791	2.7528	17.7805	0.000142807	0.00235887	DOWN
ENSG00000185436	IFNLR1	0.842224	3.34622	17.7573	0.000143383	0.00236654	NO
ENSG00000177628	GBA	0.478427	7.51831	17.7531	0.000143503	0.00236669	NO
ENSG00000072954	TMEM38A	-1.20567	-0.747361	17.749	0.000143713	0.00236832	NO
ENSG00000144524	COPS7B	-0.230867	4.63412	17.7464	0.000143848	0.00236871	NO
ENSG00000234685	NUS1P2	-1.42577	-2.28366	17.722	0.000145121	0.00238783	NO
ENSG00000176855	KRT18P28	-1.62738	-2.55019	17.7126	0.000145614	0.0023941	DOWN
ENSG00000005102	MEOX1	-3.06039	-2.87035	17.6953	0.000146529	0.00240728	DOWN
ENSG00000133731	IMPA1	0.351571	4.4911	17.6842	0.000147115	0.00241504	NO
ENSG00000132698	RAB25	-2.91664	0.646543	17.6937	0.000147348	0.00241701	DOWN
ENSG00000047936	ROS1	1.43347	-1.86998	17.6712	0.000147806	0.00242266	NO
ENSG00000116128	BCL9	-0.614834	3.80823	17.6638	0.000148203	0.00242615	NO
ENSG00000139055	ERP27	-0.917398	-0.0623592	17.663	0.000148247	0.00242615	NO
ENSG00000171100	MTM1	0.890681	4.90871	17.6719	0.000148411	0.00242698	NO
ENSG00000163399	ATP1A1	0.246016	9.47103	17.6502	0.000148934	0.00243365	NO
ENSG00000109943	CRTAM	1.6272	-1.87095	17.6364	0.000149678	0.00244341	UP
ENSG00000153896	ZNF599	-0.465181	1.10188	17.6349	0.000149761	0.00244341	NO
ENSG00000160883	HK3	0.770132	6.77618	17.6301	0.000150478	0.00245324	NO
ENSG00000135503	ACVR1B	0.273458	5.69659	17.6148	0.000150851	0.00245744	NO
ENSG00000213958	KRT18P29	-1.47577	-1.82645	17.6081	0.000151217	0.00246153	NO
ENSG00000122218	COPA	0.2015	8.20448	17.5907	0.000152177	0.00247525	NO
ENSG00000141736	ERBB2	-0.597858	4.24736	17.5864	0.000152413	0.00247721	NO
ENSG00000231414	AC016700.2	7.71374	-1.54172	17.7959	0.000152858	0.00248255	UP
ENSG00000138495	COX17	0.338611	3.96704	17.5657	0.000153558	0.00249201	NO
ENSG00000170323	FABP4	-1.63694	1.37472	17.5683	0.000154174	0.00250011	DOWN
ENSG00000101608	MYL12A	0.263787	8.75522	17.5468	0.000154612	0.0025053	NO
ENSG00000123243	ITIH5	-2.36189	0.463182	17.5434	0.00015557	0.00251891	DOWN
ENSG00000104321	TRPA1	2.24115	0.792686	17.5349	0.000156049	0.00252474	UP
ENSG00000105357	MYH14	-2.04351	2.2634	17.5219	0.000156785	0.00253473	DOWN
ENSG00000136960	ENPP2	0.499691	3.84899	17.5032	0.000157077	0.00253753	NO
ENSG00000204856	FAM216A	-0.520601	2.34749	17.4709	0.000158927	0.00256546	NO
ENSG00000163395	IGFN1	3.85728	1.71748	17.482	0.000159067	0.00256579	UP
ENSG00000181652	ATG9B	-1.83508	-0.937357	17.4719	0.000159294	0.0025675	DOWN
ENSG00000011083	SLC6A7	1.02809	-0.432893	17.4563	0.00015977	0.00257322	NO
ENSG00000105220	GPI	0.298783	8.03838	17.4467	0.000160328	0.00258027	NO
ENSG00000233680	HNRNPA1P27	1.94735	-2.44578	17.4413	0.000160643	0.00258301	UP
ENSG00000170423	KRT78	-2.45284	-1.35275	17.4478	0.000160741	0.00258301	DOWN
ENSG00000162545	CAMK2N1	-1.34811	2.14518	17.4485	0.000160922	0.00258397	NO
ENSG00000005001	PRSS22	-2.0856	-0.922647	17.4415	0.000161171	0.00258602	DOWN
ENSG00000023287	RB1CC1	0.302414	5.38765	17.4219	0.000161777	0.00259379	NO
ENSG00000185262	UBALD2	0.445023	5.28206	17.4107	0.000162439	0.00260189	NO
ENSG00000125775	SDCBP2	-1.03131	-1.22053	17.4092	0.000162527	0.00260189	NO
ENSG00000130598	TNNI2	0.667299	1.8463	17.4044	0.000162811	0.00260448	NO
ENSG00000166025	AMOTL1	-0.647019	4.97902	17.4012	0.000162998	0.00260553	NO
ENSG00000253305	PCDHGB6	0.666646	4.15969	17.3922	0.000163531	0.00261208	NO
ENSG00000134324	LPIN1	0.316665	5.24178	17.373	0.000164676	0.0026284	NO
ENSG00000127585	FBXL16	-1.88062	-1.53422	17.3706	0.000164992	0.00263147	DOWN
ENSG00000118322	ATP10B	-2.8303	-3.47749	17.3654	0.000165135	0.00263179	DOWN
ENSG00000117395	EBNA1BP2	-0.276098	5.58194	17.361	0.0001654	0.00263403	NO
ENSG00000090006	LTBP4	-0.657478	3.34714	17.3402	0.000166654	0.00265203	NO
ENSG00000223485	LINC01615	0.899886	-1.86566	17.3276	0.000167417	0.00266219	NO
ENSG00000248429	FAM198B-AS1	0.789704	3.73718	17.2936	0.00016961	0.00269504	NO
ENSG00000183010	PYCR1	-0.614671	4.3575	17.2813	0.000170265	0.00270344	NO
ENSG00000171346	KRT15	-0.785888	-0.623714	17.2772	0.00017052	0.00270547	NO
ENSG00000134597	RBMX2	0.720568	4.06504	17.2733	0.000170763	0.0027073	NO
ENSG00000092758	COL9A3	-3.47225	-2.81814	17.2694	0.000171511	0.00271517	DOWN
ENSG00000134285	FKBP11	-0.405773	3.4667	17.2612	0.000171514	0.00271517	NO
ENSG00000197857	ZNF44	-0.451429	2.81631	17.2586	0.00017168	0.00271578	NO
ENSG00000087116	ADAMTS2	0.592899	5.04849	17.2522	0.000172079	0.00272007	NO
ENSG00000161010	MRNIP	-0.494009	2.61338	17.2444	0.000172568	0.00272384	NO
ENSG00000160145	KALRN	0.774998	3.97612	17.2466	0.000172573	0.00272384	NO
ENSG00000155465	SLC7A7	0.46858	8.05132	17.2342	0.00017321	0.00273187	NO
ENSG00000076770	MBNL3	0.8683	3.68156	17.231	0.000173871	0.00274026	NO
ENSG00000138443	ABI2	-0.452616	4.82372	17.2167	0.000174323	0.00274536	NO
ENSG00000109452	INPP4B	-0.946456	1.69977	17.2121	0.000174616	0.00274794	NO
ENSG00000116996	ZP4	-2.99538	-3.63672	17.2083	0.000174856	0.00274969	DOWN
ENSG00000215190	LINC00680	-0.323785	1.70445	17.1954	0.000175678	0.00276059	NO
ENSG00000171819	ANGPTL7	-5.52398	-1.2801	17.2012	0.000176153	0.002766	DOWN
ENSG00000154114	TBCEL	0.298347	3.37421	17.136	0.000179531	0.00281696	NO
ENSG00000177370	TIMM22	-0.294731	3.75009	17.1314	0.000179832	0.00281962	NO
ENSG00000102390	PBDC1	0.846078	5.31438	17.1371	0.000180202	0.00282183	NO
ENSG00000198155	ZNF876P	-0.84187	-1.17498	17.1253	0.000180238	0.00282183	NO
ENSG00000182272	B4GALNT4	-1.15597	1.79486	17.1045	0.000182009	0.00284746	NO
ENSG00000182841	RRP7BP	-0.49117	1.57966	17.0927	0.000182394	0.00285139	NO
ENSG00000165138	ANKS6	-0.580248	3.26843	17.0892	0.000182628	0.00285297	NO
ENSG00000197928	ZNF677	-1.31754	1.49763	17.0849	0.000183445	0.00286363	NO
ENSG00000130340	SNX9	0.540858	7.47114	17.0689	0.000183992	0.00287006	NO
ENSG00000203783	PRR9	-1.61615	-1.11398	17.0668	0.000184158	0.00287055	DOWN
ENSG00000127337	YEATS4	0.303465	3.16579	17.0574	0.000184768	0.00287795	NO
ENSG00000183323	CCDC125	-1.41303	2.29631	17.0629	0.000185268	0.00288362	NO
ENSG00000157107	FCHO2	0.573122	5.59963	17.0229	0.000187115	0.00291025	NO
ENSG00000168758	SEMA4C	-0.848297	4.71887	17.0083	0.000188659	0.00293213	NO
ENSG00000243279	PRAF2	-0.525094	1.90776	16.9897	0.000189401	0.00294152	NO
ENSG00000182585	EPGN	1.02207	0.81371	16.9875	0.000189553	0.00294174	NO
ENSG00000280208	GGT4P	1.79579	-3.10452	16.9811	0.000189998	0.00294529	UP
ENSG00000225964	NRIR	-2.06858	-3.21703	16.9802	0.000190059	0.00294529	DOWN
ENSG00000116132	PRRX1	1.57043	3.76531	16.985	0.000190626	0.00295193	UP
ENSG00000008735	MAPK8IP2	-1.54536	-0.482005	16.9624	0.000191436	0.00296233	DOWN
ENSG00000067704	IARS2	0.258637	6.92642	16.948	0.000192322	0.00297387	NO
ENSG00000100211	CBY1	-0.321948	2.71407	16.9322	0.000193436	0.00298893	NO
ENSG00000105971	CAV2	-0.606524	3.72351	16.9243	0.000193999	0.00299546	NO
ENSG00000072195	SPEG	-0.704946	3.04106	16.9194	0.000194348	0.00299867	NO
ENSG00000188573	FBLL1	-1.49749	-2.66658	16.9067	0.000195253	0.00301046	NO
ENSG00000137714	FDX1	0.570634	5.01108	16.9045	0.00019541	0.00301069	NO
ENSG00000196972	SMIM10L2B	-1.04153	-0.678636	16.8934	0.000196206	0.00301862	NO
ENSG00000131849	ZNF132	-1.42061	0.263585	16.8988	0.000196241	0.00301862	NO
ENSG00000111670	GNPTAB	0.447836	7.46029	16.8915	0.000196349	0.00301862	NO
ENSG00000132205	EMILIN2	0.427918	9.04625	16.8839	0.000196899	0.00302488	NO
ENSG00000135046	ANXA1	-0.476297	8.03479	16.8778	0.000197337	0.0030286	NO
ENSG00000177575	CD163	0.561489	9.37632	16.8766	0.000197425	0.0030286	NO
ENSG00000224861	YBX1P1	0.352445	4.13222	16.8657	0.000198218	0.00303859	NO
ENSG00000253276	CCDC71L	0.363859	5.05857	16.8604	0.000198598	0.00304223	NO
ENSG00000128789	PSMG2	0.251076	4.81113	16.8518	0.00019923	0.00304971	NO
ENSG00000088727	KIF9	-0.453084	0.990933	16.8462	0.00019964	0.00305303	NO
ENSG00000147394	ZNF185	-0.545134	4.35733	16.8449	0.000199734	0.00305303	NO
ENSG00000214855	APOC1P1	0.61077	-0.255295	16.8396	0.000200124	0.0030568	NO
ENSG00000137965	IFI44	-0.939417	2.96152	16.8433	0.000200357	0.00305684	NO
ENSG00000135740	SLC9A5	-0.690736	-0.398481	16.8357	0.000200413	0.00305684	NO
ENSG00000171365	CLCN5	0.73556	5.42854	16.8333	0.000201102	0.00306515	NO
ENSG00000257605	AC073611.1	0.473003	1.21044	16.8202	0.00020156	0.00306994	NO
ENSG00000115520	COQ10B	0.407325	5.15698	16.8132	0.000202075	0.00307558	NO
ENSG00000174938	SEZ6L2	-0.606021	4.01166	16.8087	0.000202413	0.00307852	NO
ENSG00000170801	HTRA3	-0.63706	1.80326	16.8044	0.00020273	0.00308115	NO
ENSG00000130638	ATXN10	-0.321087	5.56489	16.7573	0.000206278	0.00313284	NO
ENSG00000172757	CFL1	0.211287	10.0685	16.7314	0.000208252	0.00316057	NO
ENSG00000181458	TMEM45A	-0.502219	3.0191	16.7197	0.000209154	0.00317199	NO
ENSG00000165171	METTL27	-0.880515	-0.229984	16.7144	0.000209561	0.00317591	NO
ENSG00000258828	KRT8P2	-1.01056	-1.27022	16.7023	0.000210497	0.00318721	NO
ENSG00000127903	ZNF835	-2.58579	-3.45044	16.7009	0.000210606	0.00318721	DOWN
ENSG00000143367	TUFT1	-0.783758	4.33699	16.6928	0.000211766	0.00320249	NO
ENSG00000134709	HOOK1	-2.68177	-1.14881	16.6742	0.000213664	0.00322458	DOWN
ENSG00000121274	PAPD5	0.375444	4.34559	16.6616	0.000213676	0.00322458	NO
ENSG00000039068	CDH1	-2.66764	3.27794	16.674	0.000213681	0.00322458	DOWN
ENSG00000111863	ADTRP	0.634855	6.32876	16.6533	0.000214392	0.00323302	NO
ENSG00000103710	RASL12	2.36335	-2.6538	16.6355	0.000215749	0.00325044	UP
ENSG00000026652	AGPAT4	0.372099	5.8839	16.6329	0.000215951	0.00325044	NO
ENSG00000181035	SLC25A42	-0.598053	0.363749	16.6323	0.000216004	0.00325044	NO
ENSG00000183723	CMTM4	-0.401178	4.50486	16.6079	0.000217955	0.00327748	NO
ENSG00000102401	ARMCX3	0.484888	5.74925	16.6045	0.000218227	0.00327926	NO
ENSG00000273143	AL355512.1	1.88368	-1.43201	16.6052	0.000218715	0.00328426	UP
ENSG00000161551	ZNF577	-0.693763	2.21498	16.5908	0.000219334	0.00329125	NO
ENSG00000177374	HIC1	-0.822112	2.33198	16.5852	0.000219793	0.00329508	NO
ENSG00000251538	LINC02201	1.33511	-2.07888	16.5839	0.000219898	0.00329508	NO
ENSG00000228560	AL513323.1	2.14626	-3.41832	16.5721	0.000220856	0.0033071	UP
ENSG00000267712	LINC01539	2.01622	-2.56894	16.5522	0.000222486	0.00332917	UP
ENSG00000134765	DSC1	-3.10952	-3.35829	16.5477	0.000222859	0.0033324	DOWN
ENSG00000102547	CAB39L	0.534982	3.36867	16.5402	0.000223475	0.00333927	NO
ENSG00000131746	TNS4	-2.71047	2.61509	16.544	0.000224175	0.00334738	DOWN
ENSG00000105699	LSR	-1.21684	2.17507	16.5333	0.000224664	0.00335234	NO
ENSG00000260219	AC106782.2	0.519047	1.61357	16.4777	0.000228703	0.00340924	NO
ENSG00000100462	PRMT5	-0.35133	5.41571	16.4766	0.000228797	0.00340924	NO
ENSG00000132694	ARHGEF11	0.406944	7.27967	16.4697	0.000229385	0.00341562	NO
ENSG00000263961	RHEX	3.26239	-2.54627	16.4512	0.000231599	0.00344617	UP
ENSG00000211772	TRBC2	-2.59206	0.408357	16.4476	0.000232307	0.00345429	DOWN
ENSG00000141458	NPC1	0.72791	7.99504	16.4401	0.000232486	0.00345442	NO
ENSG00000126778	SIX1	2.71554	0.392036	16.4429	0.000232718	0.00345442	UP
ENSG00000254986	DPP3	0.258664	5.46021	16.4298	0.000232802	0.00345442	NO
ENSG00000148204	CRB2	-2.98027	-0.691969	16.4344	0.00023345	0.00346162	DOWN
ENSG00000145284	SCD5	-1.574	2.26774	16.4111	0.000235467	0.0034884	DOWN
ENSG00000010404	IDS	0.732977	4.90005	16.4044	0.000235583	0.0034884	NO
ENSG00000110723	EXPH5	-2.21544	-0.816879	16.3775	0.00023842	0.00352796	DOWN
ENSG00000014123	UFL1	0.379166	5.16115	16.3593	0.00023897	0.00353364	NO
ENSG00000114771	AADAC	-1.92123	-2.01206	16.35	0.00023979	0.00354168	DOWN
ENSG00000197930	ERO1A	0.424675	7.3184	16.3494	0.000239846	0.00354168	NO
ENSG00000121316	PLBD1	0.473195	4.97798	16.3423	0.000240483	0.00354862	NO
ENSG00000111052	LIN7A	-1.27499	-0.404823	16.3067	0.000243681	0.00359211	NO
ENSG00000144645	OSBPL10	-0.565178	2.32252	16.3058	0.000243767	0.00359211	NO
ENSG00000105708	ZNF14	-0.46642	1.57783	16.2956	0.000244692	0.00360325	NO
ENSG00000229373	LINC00452	-1.49844	-2.11048	16.2817	0.000245961	0.00361943	NO
ENSG00000165661	QSOX2	-0.278217	4.09176	16.2643	0.000247549	0.00364028	NO
ENSG00000196867	ZFP28	-0.676285	2.07321	16.2595	0.000247995	0.00364343	NO
ENSG00000166532	RIMKLB	-0.529731	4.49435	16.2583	0.000248105	0.00364343	NO
ENSG00000137831	UACA	-0.422258	5.37425	16.2561	0.000248313	0.00364398	NO
ENSG00000157833	GAREM2	-0.542693	1.91184	16.2422	0.000249599	0.00366033	NO
ENSG00000226377	AC084809.1	1.37539	-2.0263	16.2385	0.000249944	0.00366286	NO
ENSG00000213967	ZNF726	-0.904238	-0.65363	16.2254	0.000251159	0.00367814	NO
ENSG00000076604	TRAF4	-0.727043	4.28886	16.2172	0.000252123	0.00368973	NO
ENSG00000261068	AL512274.1	-1.55281	-2.25493	16.2123	0.000252393	0.00369113	DOWN
ENSG00000175591	P2RY2	-1.0413	-0.903471	16.209	0.000252701	0.00369311	NO
ENSG00000149485	FADS1	-0.348733	6.641	16.2007	0.000253479	0.00369963	NO
ENSG00000165646	SLC18A2	1.4838	-1.47311	16.2006	0.000253494	0.00369963	NO
ENSG00000170846	AC093323.1	-0.45174	2.52884	16.1889	0.0002546	0.00371322	NO
ENSG00000068400	GRIPAP1	0.542816	5.92657	16.1815	0.0002553	0.00372084	NO
ENSG00000129625	REEP5	0.280342	6.9342	16.1797	0.000255471	0.00372084	NO
ENSG00000249001	AC093895.1	1.93476	-2.72981	16.1753	0.000255896	0.00372448	UP
ENSG00000162892	IL24	2.20587	-3.00519	16.1656	0.00025682	0.0037342	UP
ENSG00000169032	MAP2K1	0.263147	6.53322	16.1646	0.000256914	0.0037342	NO
ENSG00000085831	TTC39A	-1.08052	-1.33254	16.1612	0.000257242	0.00373641	NO
ENSG00000163393	SLC22A15	0.520275	4.4005	16.1382	0.000259459	0.00376604	NO
ENSG00000166147	FBN1	0.579157	7.75481	16.1354	0.000259726	0.0037668	NO
ENSG00000268388	FENDRR	1.39925	0.82954	16.1404	0.000259865	0.0037668	NO
ENSG00000139620	KANSL2	-0.235135	4.10943	16.1305	0.000260196	0.00376904	NO
ENSG00000204619	PPP1R11	0.263121	5.92126	16.1202	0.000261199	0.00377946	NO
ENSG00000224928	KRT8P30	-1.2104	-2.16191	16.1195	0.00026127	0.00377946	NO
ENSG00000203993	ARRDC1-AS1	-0.336956	2.1449	16.1105	0.000262147	0.00378957	NO
ENSG00000139112	GABARAPL1	0.401985	7.29409	16.104	0.000262783	0.00379619	NO
ENSG00000136274	NACAD	-1.25377	0.785946	16.0934	0.000263936	0.00381026	NO
ENSG00000132356	PRKAA1	0.328264	6.06178	16.0901	0.000264148	0.00381075	NO
ENSG00000197044	ZNF441	-0.981883	1.06154	16.0843	0.000264723	0.00381645	NO
ENSG00000164418	GRIK2	-0.848168	1.0725	16.0796	0.000265189	0.00382059	NO
ENSG00000125966	MMP24	-1.12786	2.47103	16.0706	0.000266789	0.00383886	NO
ENSG00000100836	PABPN1	-0.200547	5.56272	16.0632	0.000266818	0.00383886	NO
ENSG00000102962	CCL22	2.12228	4.20612	16.0661	0.000267691	0.00384883	UP
ENSG00000133313	CNDP2	0.325472	7.8516	16.0491	0.000268228	0.00385395	NO
ENSG00000185630	PBX1	-0.961373	3.02213	16.0327	0.00027059	0.00388527	NO
ENSG00000091164	TXNL1	0.312997	5.55952	16.0119	0.000271986	0.00390268	NO
ENSG00000166046	TCP11L2	0.607658	2.22564	16.0075	0.000272428	0.00390639	NO
ENSG00000096433	ITPR3	-0.86255	3.68466	16.0088	0.000273018	0.00391222	NO
ENSG00000107554	DNMBP	-0.27551	5.45251	15.9987	0.000273329	0.00391396	NO
ENSG00000150048	CLEC1A	1.71708	2.19926	16.0085	0.000273507	0.00391396	UP
ENSG00000164116	GUCY1A1	-1.56324	0.325552	15.9985	0.000274066	0.00391933	DOWN
ENSG00000131236	CAP1	0.235439	9.79506	15.9726	0.000276008	0.00394446	NO
ENSG00000188910	GJB3	-2.84526	0.413956	15.9811	0.000276315	0.0039462	DOWN
ENSG00000096996	IL12RB1	0.455219	3.10601	15.9678	0.000276503	0.00394623	NO
ENSG00000102554	KLF5	-0.808526	3.08814	15.95	0.000278355	0.00397	NO
ENSG00000102575	ACP5	0.570584	9.4514	15.9391	0.000279496	0.00398128	NO
ENSG00000105472	CLEC11A	0.382605	4.87666	15.9389	0.000279519	0.00398128	NO
ENSG00000129295	LRRC6	-0.975731	-0.431094	15.9274	0.000280723	0.00399466	NO
ENSG00000249321	OR5H5P	-3.11815	-3.20665	15.9248	0.000280992	0.00399466	DOWN
ENSG00000155903	RASA2	0.365235	5.06161	15.9245	0.000281021	0.00399466	NO
ENSG00000214087	ARL16	-0.262714	3.76143	15.9086	0.000282707	0.00401397	NO
ENSG00000183837	PNMA3	-1.77147	-1.14938	15.9144	0.000282756	0.00401397	DOWN
ENSG00000276085	CCL3L1	1.12457	9.54504	15.9167	0.000283054	0.00401552	NO
ENSG00000164142	FAM160A1	-2.09938	0.473867	15.9073	0.000284053	0.00402701	DOWN
ENSG00000174292	TNK1	-1.58847	-1.56385	15.8913	0.000284542	0.00403127	DOWN
ENSG00000175793	SFN	-2.96981	2.85298	15.8999	0.000284845	0.00403288	DOWN
ENSG00000103037	SETD6	-0.376758	2.45176	15.8859	0.000285119	0.00403292	NO
ENSG00000146386	ABRACL	0.381686	5.17772	15.8849	0.000285227	0.00403292	NO
ENSG00000148498	PARD3	-0.645037	4.15356	15.8793	0.000285832	0.00403879	NO
ENSG00000196218	RYR1	-2.13447	0.799388	15.8776	0.000287228	0.00405584	DOWN
ENSG00000136695	IL36RN	-2.26148	0.439961	15.864	0.000288692	0.0040738	DOWN
ENSG00000198576	ARC	2.02099	-0.965141	15.8599	0.000288952	0.00407477	UP
ENSG00000173705	SUSD5	-0.816822	2.1916	15.847	0.000289312	0.00407715	NO
ENSG00000166562	SEC11C	0.213705	4.65919	15.8364	0.000290462	0.00409066	NO
ENSG00000099869	IGF2-AS	-2.40355	-2.9249	15.8328	0.000290861	0.00409357	DOWN
ENSG00000137509	PRCP	0.419645	6.73369	15.8276	0.000291422	0.00409875	NO
ENSG00000129675	ARHGEF6	1.18467	6.18931	15.8247	0.000292978	0.00411792	NO
ENSG00000092148	HECTD1	0.263995	7.23179	15.8087	0.000293496	0.00412249	NO
ENSG00000140455	USP3	0.272818	5.34234	15.7792	0.000296769	0.00416571	NO
ENSG00000260804	LINC01963	-0.675496	2.72962	15.7691	0.000297896	0.00417879	NO
ENSG00000204514	ZNF814	-0.355933	2.5447	15.766	0.000298244	0.00418091	NO
ENSG00000207870	MIR221	1.27219	-0.101601	15.7526	0.000299749	0.00419924	NO
ENSG00000280202	AC005831.1	0.681597	0.00748437	15.7126	0.000304295	0.00425962	NO
ENSG00000198689	SLC9A6	0.749011	5.85214	15.718	0.000304458	0.00425962	NO
ENSG00000196352	CD55	0.474178	5.90487	15.7082	0.0003048	0.0042616	NO
ENSG00000108947	EFNB3	-1.26792	1.15708	15.7087	0.000305444	0.0042678	NO
ENSG00000140374	ETFA	0.186598	5.90444	15.6884	0.000307081	0.00428742	NO
ENSG00000139505	MTMR6	0.385128	6.04714	15.6866	0.000307293	0.00428742	NO
ENSG00000253348	AC008514.1	-2.8052	-3.27484	15.6852	0.000307451	0.00428742	DOWN
ENSG00000086065	CHMP5	0.266651	5.89355	15.6704	0.00030917	0.00430856	NO
ENSG00000012124	CD22	1.05309	1.92795	15.6684	0.000309783	0.00431233	NO
ENSG00000109089	CDR2L	-0.452464	3.7057	15.6646	0.000309845	0.00431233	NO
ENSG00000254687	AC009646.2	-2.73314	-2.54761	15.6594	0.00031045	0.00431793	DOWN
ENSG00000272455	AL391244.3	-0.478309	0.629501	15.6538	0.00031111	0.00432429	NO
ENSG00000165996	HACD1	-0.505998	1.6889	15.6336	0.000313479	0.00435437	NO
ENSG00000101224	CDC25B	0.308323	5.52076	15.6204	0.000315051	0.00437198	NO
ENSG00000152104	PTPN14	-0.429441	5.46745	15.6195	0.000315157	0.00437198	NO
ENSG00000230707	AL589987.1	2.33858	-3.17236	15.616	0.000315567	0.00437482	UP
ENSG00000101955	SRPX	0.707387	3.48136	15.6028	0.00031715	0.0043939	NO
ENSG00000179967	PPP1R14BP3	-0.478416	0.0227154	15.582	0.000319646	0.00442562	NO
ENSG00000003056	M6PR	0.378567	8.63425	15.575	0.000320486	0.00443436	NO
ENSG00000130203	APOE	0.63998	10.1334	15.5732	0.000320795	0.00443576	NO
ENSG00000250129	AC116424.1	1.78809	-3.14883	15.5696	0.000321139	0.00443763	UP
ENSG00000177082	WDR73	-0.211584	4.20574	15.5655	0.00032164	0.00443998	NO
ENSG00000117114	ADGRL2	-0.49806	4.462	15.5648	0.000321726	0.00443998	NO
ENSG00000163131	CTSS	0.459672	10.3031	15.5597	0.000322346	0.00444212	NO
ENSG00000248458	AL139147.1	1.43489	-2.70675	15.5583	0.000322517	0.00444212	NO
ENSG00000166402	TUB	-0.795503	1.86524	15.5568	0.000322703	0.00444212	NO
ENSG00000166002	SMCO4	0.661105	3.235	15.5567	0.000322715	0.00444212	NO
ENSG00000271334	LINC02104	1.27159	-1.93133	15.5443	0.000324224	0.00446001	NO
ENSG00000163644	PPM1K	0.369065	2.79805	15.5378	0.000325022	0.0044681	NO
ENSG00000156973	PDE6D	0.334883	3.78328	15.5354	0.000325314	0.00446924	NO
ENSG00000185133	INPP5J	-1.22628	-0.933128	15.5331	0.000325605	0.00446964	NO
ENSG00000239830	RPS4XP22	0.973926	-2.00627	15.5318	0.000325762	0.00446964	NO
ENSG00000138434	SSFA2	-0.321615	6.93081	15.5265	0.000326416	0.00447572	NO
ENSG00000103496	STX4	0.35431	6.41749	15.5214	0.000327042	0.00448075	NO
ENSG00000130702	LAMA5	-1.59852	4.07639	15.531	0.000327203	0.00448075	DOWN
ENSG00000171295	ZNF440	-0.772141	2.74907	15.5135	0.000328024	0.00448675	NO
ENSG00000172927	MYEOV	1.05453	3.27041	15.5228	0.000328063	0.00448675	NO
ENSG00000115694	STK25	-0.36648	5.68863	15.5073	0.000328783	0.00449373	NO
ENSG00000229644	NAMPTP1	0.909425	3.18485	15.5027	0.0003301	0.00450668	NO
ENSG00000155363	MOV10	-0.226582	5.22857	15.4963	0.000330154	0.00450668	NO
ENSG00000157064	NMNAT2	0.500162	1.62653	15.4902	0.000330918	0.00451195	NO
ENSG00000125266	EFNB2	-1.02715	5.27803	15.5007	0.000330964	0.00451195	NO
ENSG00000280832	GSEC	-0.704202	-0.671394	15.481	0.000332078	0.00452424	NO
ENSG00000186868	MAPT	-1.49394	-0.903727	15.477	0.000332683	0.0045296	NO
ENSG00000146858	ZC3HAV1L	-0.629897	1.66395	15.4727	0.000333115	0.00453258	NO
ENSG00000140538	NTRK3	0.763473	4.40694	15.4645	0.000334904	0.00455401	NO
ENSG00000151229	SLC2A13	0.616425	4.10363	15.4556	0.000335284	0.00455627	NO
ENSG00000174080	CTSF	-0.734787	3.69942	15.4387	0.000337533	0.00458328	NO
ENSG00000173898	SPTBN2	-1.90928	2.57672	15.4474	0.000337702	0.00458328	DOWN
ENSG00000143924	EML4	0.37654	7.26728	15.4224	0.000339514	0.00460494	NO
ENSG00000154277	UCHL1	-0.464787	6.60042	15.414	0.000340597	0.0046167	NO
ENSG00000233922	LINC01694	1.09038	-1.77735	15.4103	0.000341073	0.00462021	NO
ENSG00000135338	LCA5	-0.89479	0.330102	15.3893	0.000343806	0.00465427	NO
ENSG00000213064	SFT2D2	0.283266	6.99633	15.384	0.000344494	0.00466061	NO
ENSG00000176293	ZNF135	-1.84276	-0.139994	15.3768	0.000346845	0.0046875	DOWN
ENSG00000164904	ALDH7A1	-0.394328	5.27393	15.3655	0.000346921	0.0046875	NO
ENSG00000138074	SLC5A6	-0.272689	5.03117	15.3574	0.000347981	0.00469885	NO
ENSG00000226948	RPS4XP2	0.705937	-1.28577	15.351	0.000348827	0.00470729	NO
ENSG00000231203	KRT8P10	-1.1836	-1.23396	15.3492	0.000349063	0.00470749	NO
ENSG00000143061	IGSF3	-0.902557	3.1918	15.3534	0.000349286	0.00470752	NO
ENSG00000144357	UBR3	0.381888	5.59133	15.3414	0.000350098	0.00471548	NO
ENSG00000100949	RABGGTA	0.405456	4.96464	15.3397	0.000350331	0.00471564	NO
ENSG00000137880	GCHFR	0.590393	3.41196	15.3262	0.000352131	0.00473687	NO
ENSG00000138029	HADHB	0.24932	7.15809	15.3112	0.000354131	0.00475827	NO
ENSG00000184564	SLITRK6	-2.75677	0.707155	15.3216	0.000354168	0.00475827	DOWN
ENSG00000104164	BLOC1S6	0.42298	6.47548	15.3048	0.000354999	0.00476643	NO
ENSG00000219665	ZNF433-AS1	-0.512448	0.852658	15.2958	0.000356215	0.00477974	NO
ENSG00000145335	SNCA	0.466989	5.54772	15.2733	0.000359264	0.00481761	NO
ENSG00000112305	SMAP1	0.334595	5.01381	15.2674	0.000360073	0.00482543	NO
ENSG00000260231	JHDM1D-AS1	0.784289	1.89791	15.254	0.000361915	0.00484706	NO
ENSG00000125398	SOX9	-1.25054	3.1386	15.2587	0.000362722	0.00485482	NO
ENSG00000154928	EPHB1	0.838364	1.29839	15.2449	0.000363166	0.00485771	NO
ENSG00000164329	PAPD4	0.399666	5.96646	15.2402	0.000363811	0.00486329	NO
ENSG00000104093	DMXL2	0.687773	8.67409	15.2192	0.000367539	0.0049083	NO
ENSG00000085465	OVGP1	-0.797845	-0.188767	15.2127	0.000367639	0.0049083	NO
ENSG00000204941	PSG5	-1.61913	1.76312	15.2204	0.000368033	0.00491049	DOWN
ENSG00000246090	AP002026.1	-0.863169	-0.315225	15.2041	0.000368838	0.00491815	NO
ENSG00000167315	ACAA2	0.229158	5.77942	15.1976	0.000369762	0.00492738	NO
ENSG00000070404	FSTL3	-0.585285	5.48533	15.1936	0.000370316	0.00493169	NO
ENSG00000008311	AASS	-0.552286	2.79221	15.187	0.000371246	0.00494099	NO
ENSG00000014641	MDH1	0.374295	7.18828	15.1817	0.000371996	0.00494788	NO
ENSG00000105538	RASIP1	-1.47727	-2.31207	15.1698	0.000373685	0.00496724	NO
ENSG00000164935	DCSTAMP	1.24747	5.33975	15.1736	0.000374632	0.00497553	NO
ENSG00000142156	COL6A1	0.635497	8.22142	15.1629	0.000374805	0.00497553	NO
ENSG00000166797	FAM96A	0.415195	5.91553	15.1604	0.000375024	0.00497553	NO
ENSG00000170962	PDGFD	-1.43719	-1.19296	15.1589	0.000375243	0.00497553	NO
ENSG00000141574	SECTM1	-1.41392	2.35361	15.1668	0.000375607	0.00497726	NO
ENSG00000109255	NMU	-2.73239	-2.48958	15.1497	0.000377479	0.00499896	DOWN
ENSG00000007516	BAIAP3	-1.50223	-2.13848	15.1321	0.000379086	0.00501713	DOWN
ENSG00000010256	UQCRC1	0.185163	6.87567	15.1274	0.000379777	0.00502314	NO
ENSG00000215089	KRT18P11	-1.33624	-2.32983	15.1224	0.000380493	0.00502949	NO
ENSG00000264538	SUZ12P1	-0.299976	1.90955	15.119	0.000380996	0.00503302	NO
ENSG00000136732	GYPC	-0.487454	5.05701	15.113	0.000381869	0.00504143	NO
ENSG00000128266	GNAZ	-1.04457	0.823449	15.1062	0.000382859	0.00505137	NO
ENSG00000095380	NANS	0.207784	5.33939	15.1033	0.000383279	0.00505378	NO
ENSG00000137054	POLR1E	-0.319373	4.17736	15.1003	0.000383709	0.00505378	NO
ENSG00000091972	CD200	-0.835419	3.96796	15.1064	0.000383753	0.00505378	NO
ENSG00000135643	KCNMB4	-0.918864	0.0775117	15.073	0.000387739	0.00510311	NO
ENSG00000174600	CMKLR1	-0.794947	7.20434	15.0653	0.000390199	0.00513232	NO
ENSG00000214417	KRT18P13	-1.30349	-2.43214	15.0436	0.000392103	0.00515418	NO
ENSG00000150594	ADRA2A	-0.944501	-0.518351	15.028	0.00039445	0.00518184	NO
ENSG00000214787	MS4A4E	1.1034	-1.19172	15.0219	0.000395375	0.00519078	NO
ENSG00000162772	ATF3	0.86798	6.12507	15.0279	0.000396017	0.00519602	NO
ENSG00000234028	AC062029.1	-0.672467	-1.04481	15.0021	0.000398377	0.00522377	NO
ENSG00000198829	SUCNR1	1.01238	4.47615	15.0106	0.000398633	0.0052239	NO
ENSG00000058673	ZC3H11A	0.733246	-1.57704	14.9987	0.000398895	0.00522412	NO
ENSG00000227953	LINC01341	-0.972283	-1.19227	14.9763	0.000402323	0.00526389	NO
ENSG00000135502	SLC26A10	-1.36861	-1.95911	14.9745	0.000402592	0.00526389	NO
ENSG00000115828	QPCT	0.555542	3.42828	14.974	0.000402673	0.00526389	NO
ENSG00000006042	TMEM98	-0.776906	4.02772	14.9779	0.000402939	0.00526415	NO
ENSG00000116455	WDR77	-0.272346	4.47999	14.9694	0.000403382	0.00526671	NO
ENSG00000125351	UPF3B	0.792576	3.90943	14.9585	0.000405925	0.00529667	NO
ENSG00000088387	DOCK9	-0.918279	3.02802	14.9526	0.000406852	0.00530551	NO
ENSG00000162981	FAM84A	-2.30591	-0.762226	14.9433	0.000409007	0.00533034	DOWN
ENSG00000205361	MT1DP	1.95734	-2.68298	14.921	0.000410923	0.00535205	UP
ENSG00000164715	LMTK2	0.394376	4.30756	14.9132	0.000412146	0.00536469	NO
ENSG00000132334	PTPRE	0.453578	7.97494	14.908	0.000412974	0.00537219	NO
ENSG00000119392	GLE1	0.241668	5.38434	14.9029	0.000413781	0.00537752	NO
ENSG00000068912	ERLEC1	0.290794	5.91438	14.9022	0.000413888	0.00537752	NO
ENSG00000196411	EPHB4	-0.866258	3.35977	14.9009	0.000415078	0.00538653	NO
ENSG00000105255	FSD1	-1.06636	1.06231	14.8946	0.000415088	0.00538653	NO
ENSG00000005022	SLC25A5	0.859088	8.01815	14.894	0.000416802	0.00540548	NO
ENSG00000115009	CCL20	1.4145	7.35597	14.8861	0.000418062	0.00541628	NO
ENSG00000169249	ZRSR2	0.397913	3.94846	14.8755	0.000418143	0.00541628	NO
ENSG00000118707	TGIF2	-0.412192	3.81393	14.8432	0.000423341	0.00548029	NO
ENSG00000114923	SLC4A3	-0.8841	1.54395	14.8356	0.000424579	0.00549297	NO
ENSG00000123496	IL13RA2	-2.70718	1.53667	14.8404	0.000425442	0.0055008	DOWN
ENSG00000203650	LINC01285	1.09671	-1.33983	14.8263	0.000426104	0.00550602	NO
ENSG00000258777	HIF1A-AS1	0.834937	-0.449337	14.8146	0.00042801	0.0055273	NO
ENSG00000102003	SYP	0.75204	1.8591	14.8042	0.000429733	0.00554536	NO
ENSG00000261150	EPPK1	-1.73253	1.53518	14.813	0.00042993	0.00554536	DOWN
ENSG00000178623	GPR35	-0.976674	1.04162	14.795	0.000431257	0.00555911	NO
ENSG00000102385	DRP2	1.07326	1.61027	14.7869	0.00043302	0.00557847	NO
ENSG00000073792	IGF2BP2	-0.570218	4.85069	14.7776	0.000434137	0.00558949	NO
ENSG00000088832	FKBP1A	0.287903	7.84393	14.7662	0.000436043	0.00561063	NO
ENSG00000177459	ERICH5	-4.22605	0.44519	14.77	0.000437083	0.00562061	DOWN
ENSG00000006451	RALA	0.410992	6.81401	14.7514	0.000438532	0.00563373	NO
ENSG00000164099	PRSS12	-0.770927	2.07873	14.75	0.000438767	0.00563373	NO
ENSG00000187189	TSPYL4	-0.312711	4.52546	14.7492	0.000438896	0.00563373	NO
ENSG00000129009	ISLR	1.37798	1.13587	14.7324	0.000442772	0.00568007	NO
ENSG00000136535	TBR1	-4.32681	-2.21174	14.726	0.000444518	0.00569903	DOWN
ENSG00000270956	AC009948.4	0.685036	-0.847037	14.6971	0.000447782	0.00573657	NO
ENSG00000186074	CD300LF	1.3328	5.08778	14.7058	0.000447984	0.00573657	NO
ENSG00000260025	AC009414.2	-0.769274	-0.0757848	14.6891	0.000449164	0.0057449	NO
ENSG00000232524	AC073323.1	-1.17957	-1.87868	14.689	0.000449174	0.0057449	NO
ENSG00000031691	CENPQ	0.46675	2.06766	14.6869	0.000449549	0.00574624	NO
ENSG00000147144	CCDC120	-0.542004	2.08872	14.6848	0.0004499	0.00574729	NO
ENSG00000183780	SLC35F3	-2.56091	-1.02387	14.6674	0.000454645	0.00580441	DOWN
ENSG00000143612	C1orf43	0.238676	7.09772	14.6488	0.000456177	0.0058205	NO
ENSG00000138399	FASTKD1	0.315609	3.70385	14.6466	0.000456569	0.00582201	NO
ENSG00000107611	CUBN	1.61072	1.7716	14.6459	0.000458412	0.00584201	UP
ENSG00000164180	TMEM161B	0.291546	4.13157	14.6324	0.000459076	0.00584518	NO
ENSG00000182378	PLCXD1	0.45197	4.11532	14.6316	0.000459209	0.00584518	NO
ENSG00000268849	SIGLEC22P	0.776252	1.16054	14.6207	0.000461144	0.0058663	NO
ENSG00000234771	SLC25A25-AS1	-0.499155	1.96115	14.6168	0.000461831	0.00587154	NO
ENSG00000186462	NAP1L2	-1.1875	-0.908936	14.6078	0.00046344	0.00588848	NO
ENSG00000164764	SBSPON	-1.81796	-1.49896	14.6068	0.000464583	0.00589948	DOWN
ENSG00000165672	PRDX3	0.255525	7.2779	14.5993	0.000464965	0.00590082	NO
ENSG00000133519	ZDHHC8P1	-1.42595	-1.10199	14.5873	0.000467116	0.00592459	NO
ENSG00000187955	COL14A1	1.5404	0.834352	14.5801	0.000469982	0.00595631	UP
ENSG00000225439	BOLA3-AS1	-0.707171	0.759239	14.5704	0.000470176	0.00595631	NO
ENSG00000066739	ATG2B	0.313747	5.43674	14.5613	0.000471827	0.00597367	NO
ENSG00000260708	AL118516.1	-0.447424	0.269123	14.5511	0.000473684	0.00599363	NO
ENSG00000134363	FST	-0.655427	3.6238	14.5455	0.000474706	0.00599768	NO
ENSG00000162368	CMPK1	0.227692	6.34771	14.5451	0.00047478	0.00599768	NO
ENSG00000182749	PAQR7	-0.623532	3.08942	14.5448	0.000474849	0.00599768	NO
ENSG00000183291	SELENOF	0.303547	7.04816	14.5413	0.000475476	0.00599991	NO
ENSG00000198910	L1CAM	-1.12711	3.2624	14.55	0.000475662	0.00599991	NO
ENSG00000102362	SYTL4	0.813431	2.25701	14.5389	0.000475925	0.00599991	NO
ENSG00000185168	LINC00482	-1.71295	-3.38047	14.5377	0.000476152	0.00599991	DOWN
ENSG00000115008	IL1A	0.911159	9.1672	14.5429	0.000476973	0.00600671	NO
ENSG00000117614	SYF2	0.213145	4.82894	14.5215	0.000479128	0.00603028	NO
ENSG00000223756	TSSC2	-2.96517	0.434111	14.5278	0.000479759	0.00603465	DOWN
ENSG00000254470	AP5B1	0.486167	5.46451	14.5152	0.000480296	0.00603784	NO
ENSG00000159958	TNFRSF13C	-1.12592	-2.39097	14.5081	0.000481612	0.00605082	NO
ENSG00000269113	TRABD2B	0.85201	0.421723	14.4983	0.000483436	0.00607015	NO
ENSG00000146216	TTBK1	-2.17166	-2.9631	14.4916	0.000484703	0.00608248	DOWN
ENSG00000204525	HLA-C	0.406086	8.6474	14.4889	0.000485207	0.00608523	NO
ENSG00000173894	CBX2	-0.869423	1.50178	14.483	0.000486315	0.00608715	NO
ENSG00000142920	AZIN2	-0.606488	0.372854	14.4825	0.000486408	0.00608715	NO
ENSG00000122224	LY9	1.25547	1.07927	14.4871	0.000486524	0.00608715	NO
ENSG00000064763	FAR2	0.416028	4.70864	14.4815	0.000486594	0.00608715	NO
ENSG00000154040	CABYR	-0.714422	0.329119	14.4805	0.000486789	0.00608715	NO
ENSG00000173681	BCLAF3	0.693757	3.39102	14.4692	0.000488902	0.00610998	NO
ENSG00000073861	TBX21	2.74092	-0.317831	14.4757	0.00048949	0.00611375	UP
ENSG00000104972	LILRB1	0.851657	5.29598	14.4696	0.000490656	0.00612173	NO
ENSG00000169155	ZBTB43	0.338729	5.08048	14.4597	0.000490704	0.00612173	NO
ENSG00000107518	ATRNL1	-1.28851	-0.660351	14.4575	0.000491121	0.00612336	NO
ENSG00000155970	MICU3	-0.447027	1.42333	14.4522	0.000492134	0.00613104	NO
ENSG00000052850	ALX4	3.66188	-2.62988	14.4599	0.000492487	0.00613104	UP
ENSG00000157017	GHRL	-1.20405	-1.29691	14.4498	0.000492601	0.00613104	NO
ENSG00000168818	STX18	0.309732	4.95773	14.4424	0.000494005	0.00614493	NO
ENSG00000128563	PRKRIP1	-0.208592	3.64888	14.4399	0.00049449	0.00614737	NO
ENSG00000211584	SLC48A1	-0.324219	4.53058	14.4377	0.000494908	0.00614898	NO
ENSG00000113924	HGD	0.753797	-0.499774	14.4129	0.000499674	0.00620458	NO
ENSG00000135472	FAIM2	0.947851	0.858813	14.4065	0.000500917	0.00621639	NO
ENSG00000209082	MT-TL1	-0.392463	2.81165	14.3871	0.000504697	0.00625852	NO
ENSG00000246082	NUDT16P1	0.755633	1.24982	14.386	0.000504899	0.00625852	NO
ENSG00000253123	AC091182.1	0.954725	2.27409	14.3849	0.000505538	0.00626279	NO
ENSG00000123689	G0S2	1.84901	6.29469	14.3846	0.00050704	0.00627775	UP
ENSG00000231167	YBX1P2	0.35876	2.4559	14.3711	0.000507836	0.00628396	NO
ENSG00000160714	UBE2Q1	0.223777	6.36681	14.3659	0.000508849	0.00629284	NO
ENSG00000187867	PALM3	-1.21307	-1.40432	14.3638	0.000509262	0.00629429	NO
ENSG00000168395	ING5	-0.234507	4.08486	14.3424	0.00051351	0.00634311	NO
ENSG00000248958	ZSWIM5P3	-2.58751	-3.36144	14.3294	0.000516102	0.00637139	DOWN
ENSG00000170775	GPR37	-1.05887	0.679847	14.3279	0.000516397	0.00637139	NO
ENSG00000271952	LINC01954	1.08189	-1.35053	14.3203	0.000517934	0.00638517	NO
ENSG00000165626	BEND7	-0.862703	2.2376	14.3194	0.000518114	0.00638517	NO
ENSG00000250748	AC025419.1	3.16523	-3.33477	14.3146	0.000519946	0.00640019	UP
ENSG00000214944	ARHGEF28	-1.01914	1.57993	14.3097	0.0005202	0.00640019	NO
ENSG00000143772	ITPKB	0.522697	5.09388	14.3089	0.000520233	0.00640019	NO
ENSG00000253775	AC100802.1	3.01933	-1.44796	14.309	0.000522105	0.00641951	UP
ENSG00000233184	AC093157.1	-0.634142	0.401429	14.2872	0.000524618	0.00644669	NO
ENSG00000260948	AL390195.2	-0.910829	-0.87347	14.2786	0.000526379	0.0064646	NO
ENSG00000175352	NRIP3	0.636891	6.46022	14.2709	0.000528826	0.00649091	NO
ENSG00000224376	AC017104.1	-0.749623	0.00417377	14.2641	0.00052935	0.0064936	NO
ENSG00000070601	FRMPD1	-1.46634	-2.3471	14.2607	0.00053004	0.00649833	NO
ENSG00000023572	GLRX2	0.258296	3.7611	14.2552	0.000531181	0.00650857	NO
ENSG00000178096	BOLA1	-0.488472	0.573196	14.2492	0.000532412	0.00651991	NO
ENSG00000128165	ADM2	-0.758423	1.20554	14.2476	0.00053276	0.00652042	NO
ENSG00000024862	CCDC28A	0.512752	3.50768	14.2433	0.000533642	0.00652747	NO
ENSG00000131171	SH3BGRL	1.0554	7.87075	14.2332	0.000537686	0.00657316	NO
ENSG00000160293	VAV2	-0.495425	4.95035	14.2058	0.000541486	0.00661581	NO
ENSG00000081803	CADPS2	-0.742844	1.13318	14.2007	0.000542557	0.0066251	NO
ENSG00000062038	CDH3	-2.13935	3.13979	14.2046	0.000543695	0.0066352	DOWN
ENSG00000147027	TMEM47	0.53088	3.70352	14.193	0.000544187	0.00663739	NO
ENSG00000196743	GM2A	0.358862	9.67672	14.1862	0.000545625	0.00665114	NO
ENSG00000196517	SLC6A9	-0.72699	1.52037	14.1706	0.000548955	0.0066879	NO
ENSG00000235655	H3F3AP4	0.283736	3.91759	14.1651	0.000550113	0.00669818	NO
ENSG00000107954	NEURL1	-1.66457	-2.18234	14.152	0.000552929	0.00672561	DOWN
ENSG00000154274	C4orf19	-2.69211	-0.562551	14.1599	0.000553216	0.00672561	DOWN
ENSG00000089327	FXYD5	0.343203	7.60122	14.1492	0.00055353	0.00672561	NO
ENSG00000035687	ADSS	0.434035	5.46616	14.1488	0.000553629	0.00672561	NO
ENSG00000134463	ECHDC3	-0.51553	1.85179	14.1444	0.000554578	0.00673331	NO
ENSG00000106554	CHCHD3	0.202288	5.39602	14.126	0.000558567	0.00677788	NO
ENSG00000164209	SLC25A46	0.234762	5.1301	14.1173	0.000560453	0.00679688	NO
ENSG00000140600	SH3GL3	-1.1788	-1.19434	14.1155	0.00056086	0.00679795	NO
ENSG00000170088	TMEM192	0.368008	5.41827	14.1121	0.000561596	0.00680055	NO
ENSG00000263400	TMEM220-AS1	-1.16546	-2.77056	14.1116	0.000561712	0.00680055	NO
ENSG00000092841	MYL6	0.206719	9.12044	14.1093	0.000562217	0.00680279	NO
ENSG00000135063	FAM189A2	-1.23784	-0.921887	14.106	0.000562923	0.00680748	NO
ENSG00000104361	NIPAL2	0.472538	3.76643	14.0998	0.000564301	0.00681579	NO
ENSG00000197124	ZNF682	-0.452326	1.68538	14.0992	0.000564414	0.00681579	NO
ENSG00000134198	TSPAN2	-1.47514	-0.186649	14.1035	0.000564571	0.00681579	NO
ENSG00000275832	ARHGAP23	-0.60403	5.41333	14.0828	0.000568313	0.00685708	NO
ENSG00000115468	EFHD1	-1.72306	0.0424681	14.0813	0.0005704	0.00687837	DOWN
ENSG00000259760	AC015660.3	1.48033	-0.294508	14.0747	0.00057096	0.00688123	NO
ENSG00000102265	TIMP1	0.400805	8.91261	14.066	0.000571774	0.00688714	NO
ENSG00000141668	CBLN2	-3.37688	-3.11769	14.0561	0.000574281	0.00691343	DOWN
ENSG00000048545	GUCA1A	-2.70052	-0.839302	14.0603	0.000575075	0.00691909	DOWN
ENSG00000065615	CYB5R4	0.42308	5.54094	14.0444	0.000576617	0.00693155	NO
ENSG00000144677	CTDSPL	-0.294123	4.08671	14.0437	0.000576773	0.00693155	NO
ENSG00000244879	GABPB1-AS1	-0.438635	3.74337	14.0423	0.000577087	0.00693155	NO
ENSG00000127399	LRRC61	0.833889	0.0834157	14.0386	0.000577927	0.00693772	NO
ENSG00000233101	HOXB-AS3	-1.03658	-0.821659	14.0349	0.000578761	0.00694383	NO
ENSG00000144228	SPOPL	0.269445	4.82347	14.0328	0.000579234	0.00694559	NO
ENSG00000249779	AC106800.2	0.70123	-1.99252	16.0743	0.000582571	0.00698168	NO
ENSG00000176383	B3GNT4	-1.103	-2.55251	14.0015	0.000586346	0.00702157	NO
ENSG00000164855	TMEM184A	-0.750799	-1.12671	14.0006	0.000586559	0.00702157	NO
ENSG00000185684	EP400P1	-0.255504	3.11187	13.9894	0.000589132	0.00704841	NO
ENSG00000159445	THEM4	-0.291252	3.67478	13.9718	0.00059321	0.00709322	NO
ENSG00000224940	PRRT4	-1.69205	-3.29512	13.9639	0.000595032	0.00711101	DOWN
ENSG00000053438	NNAT	-1.85365	1.87182	13.9572	0.000598688	0.00715069	DOWN
ENSG00000071537	SEL1L	0.364498	7.87325	13.9424	0.000600063	0.00716311	NO
ENSG00000170412	GPRC5C	-1.40908	1.08058	13.9482	0.000600471	0.00716396	NO
ENSG00000162804	SNED1	1.09962	-0.346215	13.9327	0.000602335	0.00718218	NO
ENSG00000100385	IL2RB	-0.671474	1.24094	13.9301	0.000602968	0.0071857	NO
ENSG00000267990	AC063977.2	-1.06497	-1.63129	13.8963	0.000610977	0.00727708	NO
ENSG00000090339	ICAM1	0.470785	10.397	13.8936	0.000611643	0.00728094	NO
ENSG00000101210	EEF1A2	-1.80523	1.25213	13.8996	0.000612328	0.00728281	DOWN
ENSG00000187688	TRPV2	0.401362	7.17838	13.8901	0.000612483	0.00728281	NO
ENSG00000142405	NLRP12	1.69618	-2.2588	13.8874	0.00061311	0.00728335	UP
ENSG00000176183	AC233964.1	0.412488	2.26628	13.8864	0.00061336	0.00728335	NO
ENSG00000121964	GTDC1	0.258916	4.45033	13.8856	0.000613562	0.00728335	NO
ENSG00000054598	FOXC1	0.650205	0.392386	13.8842	0.000613896	0.00728335	NO
ENSG00000164002	EXO5	-0.309803	2.73143	13.8793	0.000615061	0.00729311	NO
ENSG00000170439	METTL7B	1.44426	-0.990535	13.8736	0.000616631	0.00730766	NO
ENSG00000111319	SCNN1A	-1.64588	-0.850986	13.8701	0.000618467	0.00732534	DOWN
ENSG00000186431	FCAR	1.13769	5.37794	13.8658	0.000620484	0.00734515	NO
ENSG00000132849	PATJ	-1.81931	1.34223	13.8565	0.000622732	0.00736767	DOWN
ENSG00000164828	SUN1	-0.177824	5.78434	13.8427	0.000623951	0.00737799	NO
ENSG00000067225	PKM	0.185984	10.9958	13.8368	0.000625399	0.00739102	NO
ENSG00000086548	CEACAM6	-2.33186	-0.633213	13.8439	0.000625815	0.00739183	DOWN
ENSG00000235169	SMIM1	-1.14938	-2.27416	13.8251	0.00062827	0.00741475	NO
ENSG00000154118	JPH3	-2.29169	-2.79313	13.8244	0.000628452	0.00741475	DOWN
ENSG00000134153	EMC7	0.221211	5.95968	13.8227	0.000628867	0.00741555	NO
ENSG00000205090	TMEM240	-1.43	-2.41013	13.8197	0.000629603	0.00742012	NO
ENSG00000245904	AC025164.1	-0.697555	-0.99476	13.803	0.000633756	0.00746493	NO
ENSG00000165288	BRWD3	0.575973	4.9569	13.7974	0.000635152	0.00747725	NO
ENSG00000128918	ALDH1A2	1.2832	5.74901	13.8043	0.000635615	0.00747857	NO
ENSG00000223799	IL10RB-AS1	0.466672	2.62016	13.7935	0.000636109	0.00748025	NO
ENSG00000113732	ATP6V0E1	0.346089	7.80357	13.7886	0.00063734	0.00748874	NO
ENSG00000169495	HTRA4	0.83249	3.91494	13.7927	0.000637662	0.00748874	NO
ENSG00000140199	SLC12A6	0.351843	6.53416	13.7864	0.000637885	0.00748874	NO
ENSG00000111328	CDK2AP1	-0.326092	5.70138	13.7813	0.000639173	0.00749634	NO
ENSG00000165449	SLC16A9	-1.31629	0.939484	13.7864	0.000639236	0.00749634	NO
ENSG00000269486	ERVK9-11	-0.760348	-1.13287	13.7789	0.000639766	0.00749842	NO
ENSG00000256234	AC022509.2	1.76047	3.37618	13.7771	0.000642415	0.00752534	UP
ENSG00000259590	AC015660.2	1.43493	0.259796	13.7705	0.000643234	0.00753078	NO
ENSG00000128833	MYO5C	-1.73707	0.710091	13.7705	0.000644102	0.00753681	DOWN
ENSG00000253559	OSGEPL1-AS1	-0.998736	-2.49399	13.7438	0.000648663	0.00758191	NO
ENSG00000220323	HIST2H2BD	-0.541714	0.953919	13.7437	0.000648668	0.00758191	NO
ENSG00000156384	SFR1	0.364088	2.28206	13.7406	0.000649468	0.00758709	NO
ENSG00000112033	PPARD	0.426082	6.79118	13.7358	0.000650683	0.00759713	NO
ENSG00000181908	AP003774.1	-2.02229	-3.87701	13.7233	0.000653894	0.00763043	DOWN
ENSG00000154134	ROBO3	-1.18622	1.01484	13.7139	0.000657336	0.00766641	NO
ENSG00000230581	ACTG1P14	0.511346	0.36677	13.7071	0.000658068	0.00767074	NO
ENSG00000198417	MT1F	0.732872	2.30741	13.6999	0.000659952	0.0076885	NO
ENSG00000108679	LGALS3BP	-0.368345	6.87342	13.6955	0.000661092	0.00769757	NO
ENSG00000244482	LILRA6	0.470243	6.02561	13.693	0.00066173	0.00770078	NO
ENSG00000135441	BLOC1S1	0.358528	3.59812	13.6895	0.000662651	0.00770574	NO
ENSG00000185479	KRT6B	-2.40918	-2.44207	13.6933	0.000662879	0.00770574	DOWN
ENSG00000001460	STPG1	-0.348428	1.97959	13.6846	0.000663918	0.00771361	NO
ENSG00000235530	AC087294.1	-0.992764	-2.07577	13.6799	0.000665156	0.00772379	NO
ENSG00000080573	COL5A3	1.3569	1.7563	13.6835	0.000666485	0.007735	NO
ENSG00000163623	NKX6-1	2.94992	-2.64088	13.6745	0.000667964	0.00774795	UP
ENSG00000104974	LILRA1	0.547061	1.40214	13.666	0.000668808	0.00775352	NO
ENSG00000122254	HS3ST2	1.33659	5.18838	13.6635	0.000671739	0.00778326	NO
ENSG00000275395	FCGBP	1.42716	9.21971	13.6601	0.000672625	0.0077872	NO
ENSG00000196821	C6orf106	0.232458	7.22778	13.6508	0.00067281	0.0077872	NO
ENSG00000147123	NDUFB11	0.366553	4.8396	13.6484	0.000673447	0.00779034	NO
ENSG00000277702	AC239859.6	-0.827312	-1.5867	13.6436	0.000674719	0.00780082	NO
ENSG00000173227	SYT12	1.54791	-1.08397	13.6458	0.000675181	0.00780193	UP
ENSG00000253767	PCDHGA8	-0.869152	-1.35027	13.6392	0.000675911	0.00780613	NO
ENSG00000146085	MUT	0.340022	4.41814	13.6324	0.000677726	0.00781599	NO
ENSG00000204348	DXO	-0.40662	2.23018	13.6322	0.000677762	0.00781599	NO
ENSG00000148484	RSU1	0.325872	6.62937	13.6318	0.000677877	0.00781599	NO
ENSG00000138069	RAB1A	0.237776	7.51917	13.6305	0.000678232	0.00781599	NO
ENSG00000167535	CACNB3	-0.408726	2.73458	13.6163	0.000682026	0.00785546	NO
ENSG00000214796	AC098934.1	-1.65796	-1.99061	13.6128	0.000682972	0.00786211	DOWN
ENSG00000148344	PTGES	-1.18194	3.29683	13.62	0.000683342	0.00786213	NO
ENSG00000226031	FGF13-AS1	-2.50418	-3.63035	13.6029	0.000685646	0.00788182	DOWN
ENSG00000166123	GPT2	-0.693233	3.13727	13.6023	0.000685795	0.00788182	NO
ENSG00000248568	KRT8P48	-1.2938	-2.00068	13.601	0.000686164	0.00788182	NO
ENSG00000101811	CSTF2	0.615933	4.38013	13.5994	0.000686596	0.00788253	NO
ENSG00000136888	ATP6V1G1	0.204265	6.91405	13.5951	0.000687742	0.00789144	NO
ENSG00000198804	MT-CO1	0.238977	13.6821	13.5917	0.00068866	0.00789773	NO
ENSG00000132854	KANK4	-0.844232	-0.463029	13.5898	0.000689198	0.00789965	NO
ENSG00000189433	GJB4	-2.09722	-3.06616	13.5776	0.000692506	0.00793329	DOWN
ENSG00000138592	USP8	0.275679	5.89669	13.5737	0.000693565	0.00794116	NO
ENSG00000089289	IGBP1	0.755926	5.16411	13.5729	0.000695823	0.0079611	NO
ENSG00000167889	MGAT5B	-1.37538	0.868608	13.5699	0.000696054	0.0079611	NO
ENSG00000163293	NIPAL1	-0.840031	0.525827	13.561	0.000697074	0.00796848	NO
ENSG00000281852	LINC00891	1.6948	-0.897471	13.5633	0.00069785	0.00797308	UP
ENSG00000158481	CD1C	0.961773	1.84274	13.5512	0.000700069	0.00799415	NO
ENSG00000228274	AL021707.2	-0.816412	-1.00316	13.5469	0.000700952	0.00799993	NO
ENSG00000087086	FTL	0.412599	14.8315	13.5278	0.000706246	0.00805605	NO
ENSG00000073417	PDE8A	0.456253	5.73292	13.5248	0.000707096	0.00805785	NO
ENSG00000011465	DCN	-0.908066	6.99063	13.533	0.000707161	0.00805785	NO
ENSG00000100116	GCAT	-0.599297	1.58699	13.5184	0.000708872	0.0080701	NO
ENSG00000108018	SORCS1	0.438002	2.95979	13.518	0.000708994	0.0080701	NO
ENSG00000135655	USP15	0.290643	5.88478	13.4866	0.000717838	0.00816641	NO
ENSG00000114331	ACAP2	0.35524	6.36946	13.4804	0.000719608	0.00818219	NO
ENSG00000215424	MCM3AP-AS1	-0.898476	-0.636917	13.4429	0.000730375	0.00829787	NO
ENSG00000134109	EDEM1	0.308619	7.30549	13.4422	0.000730561	0.00829787	NO
ENSG00000102996	MMP15	-0.578805	3.44388	13.4367	0.000732152	0.00831151	NO
ENSG00000197728	RPS26	-0.230825	6.22498	13.4339	0.000732967	0.00831632	NO
ENSG00000276850	AC245041.2	-1.46694	0.307191	13.4327	0.000734783	0.0083325	NO
ENSG00000170485	NPAS2	0.812277	5.83422	13.4195	0.000739582	0.00837886	NO
ENSG00000143436	MRPL9	-0.193117	4.48026	13.4109	0.000739658	0.00837886	NO
ENSG00000117394	SLC2A1	-1.17305	5.70853	13.4168	0.000740395	0.00838275	NO
ENSG00000267508	ZNF285	-1.0824	0.504638	13.4042	0.000741631	0.00839228	NO
ENSG00000166387	PPFIBP2	0.498397	5.358	13.3904	0.000745714	0.00843401	NO
ENSG00000170293	CMTM8	-0.899246	-1.35494	13.3789	0.000749108	0.00846791	NO
ENSG00000163923	RPL39L	-0.451735	1.86041	13.3773	0.000749577	0.00846871	NO
ENSG00000215861	AC245297.1	0.967702	4.79883	13.3805	0.000751105	0.0084814	NO
ENSG00000187123	LYPD6	-0.558213	2.10272	13.3709	0.000751496	0.0084814	NO
ENSG00000264608	AC005726.3	-1.02737	-2.14561	13.3637	0.000753618	0.00850084	NO
ENSG00000110002	VWA5A	0.825577	6.20639	13.3699	0.000754269	0.00850368	NO
ENSG00000157470	FAM81A	0.852894	-0.414955	13.348	0.000758351	0.00854246	NO
ENSG00000113205	PCDHB3	-0.844385	-0.867038	13.3474	0.00075851	0.00854246	NO
ENSG00000249751	ECSCR	2.38742	-3.02005	13.3429	0.000759884	0.00855341	UP
ENSG00000234362	LINC01914	1.58324	-2.65357	13.3414	0.000760339	0.00855402	UP
ENSG00000159685	CHCHD6	0.458089	2.3087	13.3391	0.000761033	0.0085573	NO
ENSG00000167778	SPRYD3	0.254114	5.63542	13.3221	0.000766164	0.00861046	NO
ENSG00000135480	KRT7	-2.0343	5.03387	13.3226	0.000768525	0.00863243	DOWN
ENSG00000180616	SSTR2	2.06315	0.796951	13.3191	0.000769589	0.00863983	UP
ENSG00000111186	WNT5B	-0.494222	2.8928	13.3068	0.000770847	0.00864788	NO
ENSG00000102901	CENPT	-0.289613	4.11543	13.3059	0.000771118	0.00864788	NO
ENSG00000105889	STEAP1B	0.765256	2.2007	13.3031	0.000771969	0.00865288	NO
ENSG00000105509	HAS1	1.75838	0.533969	13.3076	0.000773101	0.008661	UP
ENSG00000101190	TCFL5	-0.29927	2.60199	13.2953	0.000774372	0.00867068	NO
ENSG00000113083	LOX	-0.5606	8.52317	13.2878	0.000776665	0.00868891	NO
ENSG00000187790	FANCM	0.33518	1.91641	13.2873	0.000776815	0.00868891	NO
ENSG00000275216	AL161431.1	-3.7524	1.76712	13.2891	0.000778786	0.00870638	DOWN
ENSG00000163874	ZC3H12A	0.501667	7.51894	13.2774	0.000779872	0.00871395	NO
ENSG00000158092	NCK1	0.455521	5.56568	13.2736	0.000781061	0.00872267	NO
ENSG00000144488	ESPNL	-0.708699	-0.127066	13.2719	0.0007816	0.00872411	NO
ENSG00000166228	PCBD1	0.226477	5.08766	13.2674	0.000782986	0.00873047	NO
ENSG00000100889	PCK2	0.573318	5.79607	13.2681	0.000782989	0.00873047	NO
ENSG00000137693	YAP1	-0.399654	5.51117	13.2641	0.000784009	0.00873727	NO
ENSG00000110987	BCL7A	-0.625693	2.51368	13.2579	0.000785937	0.00875417	NO
ENSG00000214870	AC004540.1	0.767953	-0.853048	13.2526	0.000787609	0.00876821	NO
ENSG00000186205	2022-03-01	-1.8915	-1.10237	13.2567	0.000788594	0.0087746	DOWN
ENSG00000237440	ZNF737	-0.507052	2.40622	13.2444	0.000790171	0.00878756	NO
ENSG00000131174	COX7B	0.388739	6.13244	13.2407	0.000791341	0.00879598	NO
ENSG00000267365	KCNJ2-AS1	-1.53072	-1.40239	13.235	0.000793134	0.00880534	DOWN
ENSG00000116106	EPHA4	-0.718196	2.65539	13.2338	0.0007935	0.00880534	NO
ENSG00000134333	LDHA	0.339036	9.64655	13.2332	0.00079372	0.00880534	NO
ENSG00000168454	TXNDC2	0.728131	-0.863751	13.2321	0.00079405	0.00880534	NO
ENSG00000147168	IL2RG	1.02727	2.64804	13.237	0.000794249	0.00880534	NO
ENSG00000186567	CEACAM19	-0.635984	1.19235	13.229	0.00079504	0.00880952	NO
ENSG00000166165	CKB	-2.1898	2.89831	13.2252	0.000798793	0.00884651	DOWN
ENSG00000254535	PABPC4L	-0.646794	1.83444	13.2126	0.000800244	0.00885797	NO
ENSG00000125900	SIRPD	0.760662	0.161205	13.2069	0.00080205	0.00887335	NO
ENSG00000122642	FKBP9	-0.271341	6.33003	13.2029	0.000803312	0.00888271	NO
ENSG00000205885	C1RL-AS1	-0.436055	1.27333	13.1947	0.000805943	0.00890718	NO
ENSG00000132824	SERINC3	0.273492	7.42513	13.1811	0.000810339	0.00895111	NO
ENSG00000108511	HOXB6	-0.621037	2.61194	13.1756	0.000812099	0.00896321	NO
ENSG00000239523	MYLK-AS1	-0.970444	-2.38097	13.1751	0.000812275	0.00896321	NO
ENSG00000166394	CYB5R2	-0.46459	3.36568	13.1735	0.000812795	0.0089643	NO
ENSG00000198712	MT-CO2	0.221678	12.4385	13.1675	0.000814735	0.00898105	NO
ENSG00000168646	AXIN2	-1.33881	-0.990529	13.1633	0.000816086	0.00899129	NO
ENSG00000147099	HDAC8	0.651435	3.16176	13.1572	0.000818087	0.00900868	NO
ENSG00000169193	CCDC126	0.394566	2.50659	13.1485	0.000820916	0.00903258	NO
ENSG00000035681	NSMAF	0.762135	7.27411	13.1551	0.000821105	0.00903258	NO
ENSG00000130158	DOCK6	0.548092	3.06526	13.1355	0.000825179	0.00907271	NO
ENSG00000121210	TMEM131L	-0.421462	3.21651	13.1325	0.000826166	0.00907888	NO
ENSG00000087095	NLK	-0.177095	4.94266	13.1287	0.000827417	0.00908793	NO
ENSG00000126653	NSRP1	0.295663	4.71007	13.1258	0.000828382	0.00909385	NO
ENSG00000243961	PARAL1	1.57341	0.0594313	13.1276	0.000830054	0.00910341	UP
ENSG00000170558	CDH2	-0.463615	7.3702	13.1206	0.000830107	0.00910341	NO
ENSG00000174516	PELI3	0.45121	2.13931	13.1169	0.000831332	0.00911216	NO
ENSG00000177879	AP3S1	0.231603	5.79169	13.1052	0.000835208	0.00914905	NO
ENSG00000100448	CTSG	6.71231	-3.01888	14.4175	0.000835557	0.00914905	UP
ENSG00000173085	COQ2	0.591743	4.31994	13.1019	0.0008363	0.00915248	NO
ENSG00000168807	SNTB2	0.311169	4.67998	13.0958	0.00083833	0.00916998	NO
ENSG00000150961	SEC24D	0.248609	6.80432	13.083	0.000842624	0.00921223	NO
ENSG00000284930	AC005280.2	0.775166	1.44336	13.0806	0.000843456	0.00921632	NO
ENSG00000143324	XPR1	0.29361	5.74828	13.0791	0.000843933	0.00921632	NO
ENSG00000255495	AC145124.1	-1.10064	-1.21433	13.0781	0.000844296	0.00921632	NO
ENSG00000106484	MEST	-0.942872	7.21286	13.0784	0.000846859	0.00923957	NO
ENSG00000250274	AC034199.1	0.640594	0.343347	13.0651	0.000848674	0.00925081	NO
ENSG00000223552	AC098613.1	0.425318	2.93935	13.0649	0.000848758	0.00925081	NO
ENSG00000165943	MOAP1	0.353261	5.02439	13.0609	0.000850099	0.00926069	NO
ENSG00000081237	PTPRC	0.493863	8.41856	13.0517	0.000853229	0.00928648	NO
ENSG00000283213	AC130466.1	1.04935	0.0214087	13.0514	0.000853338	0.00928648	NO
ENSG00000133636	NTS	-1.72844	-2.65329	13.0383	0.000857789	0.00933015	DOWN
ENSG00000204946	ZNF783	-0.313001	3.44445	13.029	0.000860983	0.00936012	NO
ENSG00000173706	HEG1	-0.400271	7.75891	13.0268	0.000861765	0.00936137	NO
ENSG00000066056	TIE1	1.31945	0.639028	13.031	0.000861978	0.00936137	NO
ENSG00000253159	PCDHGA12	0.989009	-2.33922	13.0209	0.000863786	0.00937624	NO
ENSG00000121769	FABP3	0.495285	5.55344	13.0194	0.000864301	0.00937705	NO
ENSG00000144648	ACKR2	-1.3326	0.371902	13.0202	0.000865682	0.00938725	NO
ENSG00000105619	TFPT	0.400214	4.02754	13.0107	0.000867301	0.00940003	NO
ENSG00000088367	EPB41L1	0.552452	5.64976	13.0076	0.000868377	0.0094069	NO
ENSG00000162976	PQLC3	0.345175	4.91778	13.0023	0.000870234	0.00942223	NO
ENSG00000178015	GPR150	0.901135	-1.00282	12.9928	0.000873555	0.00945339	NO
ENSG00000145431	PDGFC	-0.374823	5.28088	12.9802	0.000877952	0.00949614	NO
ENSG00000236747	LINC01282	1.38596	-1.72288	12.9663	0.000882844	0.00954422	NO
ENSG00000183549	ACSM5	-0.720269	-1.2644	12.9637	0.000883761	0.00954927	NO
ENSG00000153132	CLGN	-1.84461	0.476781	12.9667	0.000885471	0.00956291	DOWN
ENSG00000100031	GGT1	1.21361	-0.962992	12.9561	0.000886477	0.00956893	NO
ENSG00000162706	CADM3	-0.88979	1.87925	12.9503	0.000888511	0.00958602	NO
ENSG00000229386	OR8B9P	1.03255	-0.731955	12.9478	0.000889417	0.00959094	NO
ENSG00000144115	THNSL2	-0.775372	-1.80539	12.9396	0.000892326	0.00961744	NO
ENSG00000170004	CHD3	-0.249018	6.47127	12.929	0.000896119	0.00965344	NO
ENSG00000132906	CASP9	0.624489	3.33355	12.9257	0.00089731	0.00966138	NO
ENSG00000038219	BOD1L1	0.253377	6.40189	12.9215	0.000898812	0.00967267	NO
ENSG00000084234	APLP2	0.279066	11.0531	12.9193	0.000899615	0.00967542	NO
ENSG00000198682	PAPSS2	0.434058	7.13393	12.9167	0.000900555	0.00967542	NO
ENSG00000187772	LIN28B	-1.80459	0.336384	12.9236	0.000900877	0.00967542	DOWN
ENSG00000266010	GATA6-AS1	-0.705219	-1.07358	12.9158	0.000900884	0.00967542	NO
ENSG00000285090	AC002074.1	-0.732244	-1.79287	12.9144	0.00090139	0.00967598	NO
ENSG00000112796	ENPP5	-1.58214	-1.94481	12.8997	0.000906718	0.00972828	DOWN
ENSG00000256660	CLEC12B	1.00399	0.55089	12.8958	0.000908146	0.00973869	NO
ENSG00000182107	TMEM30B	-1.54886	-1.30644	12.889	0.000911337	0.00976406	DOWN
ENSG00000185920	PTCH1	0.33298	2.78235	12.8868	0.000911429	0.00976406	NO
ENSG00000122756	CNTFR	-2.08258	-2.76358	12.8762	0.000915289	0.00980049	DOWN
ENSG00000250221	KRT8P32	-0.970653	-1.58578	12.8668	0.000918733	0.00983243	NO
ENSG00000213997	PGAM1P7	0.989516	-1.32532	12.853	0.000923843	0.00988215	NO
ENSG00000010278	CD9	0.332527	8.86554	12.8379	0.00092945	0.00993714	NO
ENSG00000184905	TCEAL2	-2.63474	-1.23101	12.8257	0.000936916	0.0100119	DOWN
ENSG00000119514	GALNT12	0.80413	3.16391	12.8137	0.000940123	0.0100412	NO
ENSG00000163781	TOPBP1	0.284893	5.58773	12.807	0.000941051	0.0100461	NO
ENSG00000165714	BORCS5	0.312119	3.17176	12.8042	0.000942112	0.0100518	NO
ENSG00000204128	C2orf72	-1.00949	-1.81185	12.8031	0.00094253	0.0100518	NO
ENSG00000171877	FRMD5	-1.59847	1.35285	12.7972	0.000947699	0.0100986	DOWN
[truncated: 19,309 more rows]

## Sheet: GSEA CBL404CYvCC HALLMARK
pathway	pval	padj		log2err	ES	NES	size	leadingEdge
HALLMARK_OXIDATIVE_PHOSPHORYLATION	1e-10	5e-09	8.30103	NA	0.620643	2.26156	200	AIFM1,ACO2,ATP6V1H,ATP6V1E1,NDUFB2,MPC1,ATP6V1D,OAT,ALAS1,ACAA1,COX5B,CYB5A,ATP6V1F,ATP5F1E,COX4I1,TCIRG1,COX17,GPI,FDX1,ETFA,HADHB,ACAA2,MDH1,UQCRC1,SLC25A5,PRDX3,ATP6V0E1,ATP6V1G1,COX7B,LDHA,ATP6V0B,SDHD,COX8A,DECR1,ATP6V1C1,NDUFA1,ATP6AP1,UQCRFS1,PHYH,SDHB,HSPA9,DLST,NDUFA2,NDUFS1,HADHA,AFG3L2,DLAT,COX6B1,COX6C,NDUFB5,ATP5MC3,UQCRC2,COX7A2,ACAT1,TIMM10,SLC25A6,CASP7,COX6A1,NDUFS4,COX5A,NDUFA5,…
HALLMARK_COMPLEMENT	1.19e-09	2.98e-08	7.52578	0.788187	0.575154	2.06371	183	MMP12,SERPINA1,APOC1,MMP8,CPM,OLR1,ERAP2,C1S,CBLB,LIPA,CDA,SCG3,LGALS3,LTA4H,PHEX,LAMP2,CTSC,CR1,LAP3,CPQ,CA2,DGKG,L3MBTL4,IL6,CTSL,KLK1,PSMB9,FDX1,PRCP,CD55,CTSS,STX4,TIMP1,USP8,USP15,CASP9,PLEK,ITGAM,PLA2G7,CDH13,PREP,MAFF,CTSB,JAK2,C1R,CTSD,S100A9,PFN1,FCER1G,ADRA2B,CTSH,CXCL1,CASP7,ADAM9,VCPIP1,XPNPEP1,FCN1,CALM3,CALM1,DUSP6,DUSP5,PRSS36,GNB4,PIK3CA,PIM1,GMFB,FN1,GPD2,PLSCR1,KYNU,CASP4,CFH,IR…
HALLMARK_COAGULATION	1.3e-07	2.17e-06	5.66354	0.690132	0.601486	2.03038	111	CTSK,SERPINA1,USP11,APOC1,MMP1,MMP8,MMP7,OLR1,MMP2,C1S,P2RY1,COMP,MMP3,HTRA1,MMP10,LTA4H,LAMP2,TIMP3,PROS1,CPQ,WDR1,FBN1,TIMP1,CASP9,CD9,PLEK,PREP,MAFF,APOC2,CTSB,VWF,C1R,GSN,C8G,A2M,MEP1A,CTSH,ITGB3,SH2B2,ADAM9
HALLMARK_TNFA_SIGNALING_VIA_NFKB	4.09e-07	5.11e-06	5.29158	0.674963	0.510393	1.85982	200	CCL2,OLR1,CXCL2,CCRL2,CXCL3,BCL2A1,SAT1,CSF1,IL18,EGR2,SLC16A6,PLPP3,SGK1,NAMPT,IL6,ATF3,PTPRE,CCL20,IL1A,G0S2,ICAM1,ZC3H12A,PLEK,FUT4,GEM,TSC22D1,CCL4,MAFF,TANK,INHBA,ID2,FOSL2,RCAN1,DUSP2,JUNB,CXCL1,TNFSF9,REL,MAP2K3,KLF9,NR4A3,IRS2,NFE2L2,NFKBIE,RIPK2,DUSP5,PHLDA1,TGIF1,IL7R,GPR183,LITAF,KYNU,MAP3K8,CDKN1A,CEBPB,MCL1,PPP1R15A,BTG2,CD69,TAP1,CD83,NFKBIA,CFLAR,PTGS2,PLAUR,KLF2,CD80,BIRC2,EIF1,SP…
HALLMARK_ALLOGRAFT_REJECTION	2.92e-06	2.92e-05	4.53462	0.627257	0.521425	1.85774	162	CCL2,IGSF6,ELF4,PRKCB,WARS1,HIF1A,NCR1,CSF1,IL18,CAPG,CCR5,CCL7,FCGR2B,IL6,CRTAM,CCL22,IL12RB1,CTSS,TIMP1,ICAM1,NCK1,IL2RG,PTPRC,GALNT1,HLA-DMA,CCL4,CCND3,SOCS5,INHBA,JAK2,RPL39,CDKN2A,HLA-DRA,HLA-A,UBE2D1,BCAT1,HLA-G,HCLS1,TAP2,HLA-DMB,CD1D,RIPK2,BCL10,HLA-E,ITGB2,B2M,IL2RA,TLR1,FGR,MTIF2,STAT1,FLNA,TAP1,IL7,TLR3,PSMB10,CD79A,CD80,PTPN6,SIT1,MRPL3,IFNGR1,EIF3D
HALLMARK_IL6_JAK_STAT3_SIGNALING	0.00010199	0.000566613	3.24671	0.538434	0.57957	1.84442	79	IL13RA1,CXCL3,MYD88,CSF1,IL1R2,CCL7,IL6,ACVR1B,IL12RB1,IL2RG,CD9,IL1R1,IFNAR1,ACVRL1,A2M,CXCL1,ITGB3,STAM2,IL17RA,IL3RA,LEPR,STAT2,PIM1,CD14,PTPN1,IL2RA,MAP3K8,PTPN11,STAT1,CSF2RA,IL7,CSF2RB,IL10RB
HALLMARK_PROTEIN_SECRETION	0.00013264	0.000663199	3.17836	0.518848	0.547071	1.80295	96	OCRL,GLA,CD63,ATP6V1H,IGF2R,LAMP2,CTSC,RAB9A,ATP1A1,M6PR,AP3S1,SEC24D,PPT1,ATP7A,VAMP4,TSG101,RAB2A,NAPA,ARFGEF2,STX12,BNIP3,CLTA,VAMP3,YIPF6,AP3B1,VAMP7,RAB14,RPS6KA3,TMX1,NAPG,MON2,CLTC,ARFGEF1,ARF1,VPS4B,TMED2,RER1,ADAM10,SEC22B,STX7,DOP1A,AP2S1,AP1G1,RAB22A,GBF1,STAM,LMAN1
HALLMARK_INFLAMMATORY_RESPONSE	8.04e-06	5.75e-05	4.24033	0.593325	0.494799	1.78386	186	CYBB,CCL2,AQP9,TNFSF10,OLR1,CCRL2,HIF1A,MARCO,CXCL8,CSF1,IL18,RGS16,CCL7,SLC31A1,NAMPT,IL6,CD70,FZD5,ROS1,ACVR1B,CCL22,CD55,PTPRE,CCL20,IL1A,TIMP1,ICAM1,IL1R1,SLC7A2,IFNAR1,INHBA,SLC31A2,MEFV,MEP1A,SLC1A2,TNFSF9,ITGA5,ITGB3,SELL,SLC11A2,GNA15,ATP2A2,RGS1,TNFSF15,RIPK2,OSM,CD48,CD14,IL7R,CX3CL1,GPR183,PTGER2,TLR1,PTAFR,SELENOS,CDKN1A,KCNA3,LPAR1,BTG2,CD69,HAS2
HALLMARK_APOPTOSIS	0.000491167	0.00223258	2.65119	0.477271	0.447686	1.58395	153	XIAP,TNFSF10,BGN,BCAP31,MMP2,SAT1,HGF,IL18,IGF2R,LGALS3,TIMP3,IGFBP6,EMP1,IL6,CDC25B,ATF3,IL1A,TIMP1,CASP9,TSPO,SMAD7,PPT1,SPTAN1,DNAJC3,SLC20A1,GSN,MGMT,CASP7,DDIT3,PDGFRB,RNASEL,GNA15,MADD,ENO2,ROCK1,PLPPR4,BCL2L2,PPP3R1,BCL10
HALLMARK_EPITHELIAL_MESENCHYMAL_TRANSITION	0.00055213	0.00230054	2.63817	0.477271	0.428138	1.55595	198	MXRA5,SPP1,MMP1,COL6A3,BGN,CADM1,ABI3BP,CXCL12,MMP2,GREM1,SAT1,CXCL8,VCAM1,COMP,MMP3,HTRA1,CAPG,MGP,TIMP3,POSTN,CALU,NID2,IL6,COL8A2,TPM4,TNFRSF11B,COPA,PRRX1,FBN1,TIMP1,COL5A3,THBS2,GEM,TGM2,INHBA,COL6A2,PLOD3,ID2,CXCL1,ADAM12,ITGA5,SNTB1,ITGB3,PDGFRB,SGCG,ITGB1,ENO2
HALLMARK_ADIPOGENESIS	0.000782408	0.00300926	2.52154	0.477271	0.42971	1.54905	192	LAMA4,AIFM1,ACO2,RIOK3,ATP1B3,GHITM,SQOR,GBE1,NABP1,CPT2,DHRS7B,ENPP2,REEP5,APOE,ACAA2,UQCRC1,PRDX3,CMPK1,COX7B,SLC66A3,APLP2,SULT1A1,COX8A,CHCHD10,DECR1,TANK,PHYH,SDHB,PPM1B,CCNG2,DLAT,PIM3,UBC,MTCH2,UCP2,DBT,UBQLN1,COX6A1,SCP2,NDUFA5,QDPR,TOB1,DHRS7,MGST3,PPP1R15B,PPARG,CHUK,SUCLG1,CDKN2C,NDUFS3
HALLMARK_XENOBIOTIC_METABOLISM	0.00378768	0.00996759	2.00141	0.431708	0.422071	1.50465	166	HPRT1,CYP27A1,FBP1,AQP9,ACO2,CDA,ALAS1,PROS1,CA2,CYB5A,GSTO1,HSD11B1,NPC1,GABARAPL1,CNDP2,APOE,PPARD,PAPSS2,IL1R1,TMEM176B,PINK1,VNN1,ALDH9A1,ENTPD5,SLC6A12,PC,ID2,MAN1A1,COMT,SERTAD1,BCAT1,SAR1B,ATP2A2,DHRS7,IGFBP1,PGRMC1,MTHFD1,AKR1C2,TMBIM6,LONP1,RAP1GAP,ABHD6,ATOH8,ELOVL5,KYNU,SLC22A1
HALLMARK_HEME_METABOLISM	0.00126705	0.00395952	2.40236	0.45506	0.421815	1.50303	173	TFRC,MOSPD1,ATG4A,RIOK3,ABCG2,LAMP2,HTATIP2,PDZK1IP1,CA2,KAT2B,AGPAT4,ACP5,SNCA,CCDC28A,USP15,MARCHF2,OSBP2,CCND3,RNF19A,DCAF11,PICALM,CTSB,PC,XK,ADIPOR1,P4HA2,KDM7A,UCP2,NCOA4,MAP2K3,SLC11A2,NNT,MGST3,MKRN1,FBXO7,SLC22A4,RNF123,HAGH,DCUN1D1,KLF1,SLC30A1,RAP1GAP
HALLMARK_MTORC1_SIGNALING	0.00116143	0.00392839	2.40579	0.45506	0.408914	1.49004	200	HPRT1,TFRC,PGK1,FGL2,GLA,WARS1,PDK1,LTA4H,ATP6V1D,CTSC,TPI1,GBE1,NAMPT,GPI,ERO1A,M6PR,RAB1A,EDEM1,LDHA,CD9,ENO1,HK2,HSPA9,PSMC2,STARD4,SKAP2,TBK1,BCAT1,DDIT3,ACTR3,MAP2K3,ATP2A2,QDPR,SLC1A4,ACTR2,PSMA4,PSMD14,GAPDH,NUPR1,ITGB2,UBE2D3,PRDX1,ELOVL5,IFI30,CDKN1A,UFM1,PPP1R15A,IDH1,BTG2,RDH11,RPN1
HALLMARK_INTERFERON_GAMMA_RESPONSE	0.00262942	0.00730395	2.13644	0.431708	0.397491	1.43452	193	CCL2,FGL2,TNFSF10,MYD88,WARS1,HIF1A,C1S,IL18BP,VCAM1,LAP3,CCL7,NAMPT,IL6,PSMB9,HLA-B,ICAM1,METTL7B,HLA-DMA,HLA-DRB1,NLRC5,SPPL2A,TRIM26,JAK2,C1R,NCOA3,VAMP8,MVP,HLA-A,APOL6,CASP7,PSMB8,LATS2,HLA-G,RIPK2,STAT2,PIM1,PTPN1,B2M,UBE2L6,IFI30,PLSCR1,CASP4,CDKN1A,CFH,IRF2,CD69,STAT1,TAP1,RIPK1,IL7,NFKBIA,CSF2RB,TOR1B,PTGS2,PFKP,PSMB10
HALLMARK_IL2_STAT5_SIGNALING	0.0116779	0.0278046	1.55588	0.38073	0.376709	1.35791	187	SPP1,FGL2,TNFSF10,RORA,PRKCH,CSF1,IGF2R,CAPG,RGS16,ENPP1,IL1R2,CA2,EMP1,ANXA4,GSTO1,SNX9,GABARAPL1,COL6A1,PTCH1,NDRG1,HK2,TGM2,MAFF,CCND3,RRAGD,NCOA3,GLIPR2,PLPP1,TLR7,PHTF2,SELL,TIAM1,BATF,NRP1,IL1RL1,IL3RA,TTC39B,CD48,CTSZ,ENO3,PHLDA1,PIM1,SNX14,CD81,IL2RA,PTGER2,PLSCR1,MAP3K8
HALLMARK_PI3K_AKT_MTOR_SIGNALING	0.0543004	0.108601	0.964167	0.321776	0.401906	1.32738	98	PRKCB,MYD88,PDK1,PPP1CA,CFL1,CAB39L,NCK1,IL2RG,PFN1,TBK1,DDIT3,RPS6KA3,RPS6KA1,ACTR3,MAP2K3,TIAM1,RALB,ARPC3,ACTR2,DUSP3,CLTC,ARF1,ITPR2,PIKFYVE,STAT2,SMAD2,UBE2D3,MAPKAP1,CDKN1A,PTPN11,YWHAB,RIPK1,PTEN
HALLMARK_UV_RESPONSE_UP	0.0323776	0.0703862	1.15251	0.321776	0.372987	1.31965	153	TFRC,EIF2S3,PLCL1,CXCL2,ALAS1,ACAA1,CA2,IL6,NPTX2,ATP6V1F,NTRK3,ATF3,ICAM1,SULT1A1,PPT1,ATP6V1C1,CCND3,SPR,SLC6A12,PDLIM3,JUNB,NAT1,HSPA13,RAB27A,ENO2,CDC5L,PPIF,PPP1R2,HLA-F,TMBIM6,MGAT1
HALLMARK_DNA_REPAIR	0.0849257	0.151653	0.819149	0.224966	0.346342	1.21999	150	HPRT1,USP11,BCAP31,CDA,POLA1,MPC2,COX17,UPF3B,RALA,ITPA,GTF2B,AK3,POLD3,TSG101,GSDME,TAF12,NUDT9,HCLS1,POLR2G,RPA3,POLR2K,ERCC5,POLR2J,POLR2A,GTF2A2,TMED2,AGO4,GUK1,RPA2,RNMT,SDCBP,POLR3GL
HALLMARK_HYPOXIA	0.0668151	0.128491	0.891128	0.261664	0.337281	1.21599	189	FBP1,PGK1,BGN,RORA,PDK1,PGF,LXN,TPI1,GBE1,IL6,GPI,IDS,ERO1A,SRPX,ATF3,HAS1,LDHA,ENO1,NDRG1,ATP7A,HK2,TGM2,MAFF,LARGE1,PDK3,RRAGD,GPC4,CCNG2,FOSL2,SLC2A5,P4HA2,DDIT3,PGM2,XPNPEP1,ENO2,IGFBP1,IRS2,ENO3,GAPDH,WSB1,S100A4,PIM1
HALLMARK_FATTY_ACID_METABOLISM	0.135076	0.23289	0.632849	0.17822	0.335632	1.16669	141	SMS,ACOT2,HPGD,ACO2,HSD17B4,ACSL4,ACAA1,CA2,CPT2,GABARAPL1,HADHB,ACAA2,MDH1,G0S2,PCBD1,LDHA,GPD1,SDHD,DECR1,PTPRG,DLST,VNN1,ALDH9A1,SUCLG2,ENO2,PPARA,OSTC,PDHA1,SUCLG1,CD1D,SERINC1,ACSL5,TP53INP2,ENO3,GPD2,UBE2L6,ELOVL5,SDHA,HMGCL,GLUL,IDH1,HCCS,RDH11,HSPH1,IDH3G,SUCLA2,MDH2,BLVRA,SDHC
HALLMARK_MYOGENESIS	0.0211607	0.0480925	1.31792	0.352488	-0.386777	-1.3573	171	TNNT3,ERBB3,PTP4A3,SCD,COX7A1,EFS,ITGB4,MAPK12,PPP1R3C,LAMA2,TPD52L1,MB,IGF1,GJA5,SPEG,KLF5,RYR1,FST,CKB,SSPN,IGFBP3,CLU,REEP1,TNNT1,CRYAB,TNNC1,MYL6B,PKIA,CFD,NOS1,ACTC1,FDPS,SVIL,CHRNB1,MEF2A,ACHE,COL4A2,NCAM1,CTF1,DTNA,ITGB5,MYH3,TAGLN,CRAT,GNAO1,DMPK,TEAD4,AK1,TPM2,TNNT2,WWTR1,MYL3,MYL4,PLXNB2,CNN3
HALLMARK_MYC_TARGETS_V2	0.0714286	0.132275	0.878522	0.231127	-0.443138	-1.36191	58	SLC29A2,WDR74,MYC,NOLC1,PA2G4,NOP56,PPAN,UNG,SUPV3L1,NPM1,TMEM97,LAS1L,DCTPP1,TCOF1,GRWD1,NOP2,PUS1,PPRC1,MYBBP1A,SLC19A1,BYSL,GNL3,HSPD1,SRM,UTP20,RRP9,PES1,MAP3K6
HALLMARK_CHOLESTEROL_HOMEOSTASIS	0.0421773	0.0878694	1.05616	0.321776	-0.45934	-1.45121	71	DHCR7,FADS2,MAL2,SEMA3B,SCD,TM7SF2,GNAI1,FDFT1,CBS,ACAT2,CLU,PCYT2,FDPS,GSTM2,FASN,ATF5
HALLMARK_ESTROGEN_RESPONSE_LATE	0.00236112	0.00694447	2.15836	0.431708	-0.424222	-1.50039	182	PERP,DHCR7,NBL1,TSPAN13,TRIM29,KRT19,KRT13,PKP3,AGR2,CYP26B1,SEMA3B,TFPI2,CLIC3,MDK,FDFT1,AREG,RAPGEFL1,SLC27A2,TPD52L1,LAMC2,CDH1,LSR,GJB3,SFN,MAPT,NMU,SCNN1A,PTGES,CKB,MEST,PLXNB1,FGFR3,SULT2B1,KCNK5,DLG5,CDC20,TNNC1,IMPA2,DHRS2,GFUS,TJP3,OLFM1,CCND1,PCP4,PRSS23,HR,FLNB,CACNA2D2,ABCA3
HALLMARK_APICAL_JUNCTION	0.00117852	0.00392839	2.40579	0.45506	-0.426418	-1.51842	188	GAMT,CDSN,JUP,DSC3,PPP2R2C,CLDN9,PBX2,GRB7,MDK,ADAMTS5,ITGA2,CDH8,GNAI1,ITGB4,ADRA1B,MPZL2,MAPK11,CRB3,NLGN2,LAMC2,SPEG,CDH1,DSC1,VAV2,CDH3,CADM3,SDC3,SLIT2,NF2,LAMA3,CLDN4,CERCAM,TRO,PTK2,COL9A1,THBS3,CDH15,ACTC1,SGCE,PLCG1,COL17A1,PARD6G,CLDN6,CLDN19,NEXN,BMP1,SYMPK,EGFR,CDH11,FSCN1,TMEM8B,JAM3,SHC1,CALB2,FLNC,NEGR1,ADAM15,LAYN,CRAT,ITGA3,YWHAH,CADM2,MVD,WNK4,HRAS,CNN2
HALLMARK_APICAL_SURFACE	0.00923406	0.0230851	1.63667	0.38073	-0.570387	-1.61017	39	GATA3,LYPD3,MAL,GSTM3,EPHB4,GHRL,IL2RB,RTN4RL1,AFAP1L2,EFNA5,NTNG1,TMEM8B,GAS1,CROCC
HALLMARK_ESTROGEN_RESPONSE_EARLY	6.96e-05	0.000434956	3.36155	0.538434	-0.468875	-1.66412	189	DHCR7,NBL1,ELF3,KRT19,CBFA2T3,MUC1,RHOD,KRT13,ESRP2,SYBU,CYP26B1,KRT18,SEMA3B,KRT8,CLIC3,FDFT1,OLFML3,AREG,RAPGEFL1,SLC27A2,TPD52L1,THSD4,RETREG1,KRT15,ZNF185,P2RY2,TTC39A,SFN,MAPT,TGIF2,SCNN1A,PTGES,SLC2A1,SULT2B1,KCNK5,REEP1,DHRS2,WWC1,TJP3,OLFM1,CCND1,SVIL,MYC,FASN,PRSS23,HR,FLNB,ABCA3,LAD1,ENDOD1,SYNGR1,MYBL1,IGFBP4
HALLMARK_KRAS_SIGNALING_DN	4.61e-06	3.84e-05	4.41567	0.610527	-0.55113	-1.87028	133	GAMT,MACROH2A2,RGS11,SPRR3,ARHGDIG,KRT13,KRT5,LYPD3,SLC25A23,CLSTN3,KCNN1,KRT4,GDNF,IFI44L,SYNPO,NTF3,KLK8,KRT15,RYR1,SPTBN2,EFHD1,GPRC5C,THNSL2,CNTFR,FGFR3,EGF,NOS1,ACTC1,PKP1,EDN1,MX1,EDN2,KCNQ2,HTR1D

## Sheet: GSEA CBL404CYvCC KEGG pathways
pathway	pval	padj	log2err	ES	NES	size	leadingEdge
KEGG_LYSOSOME	1.86e-09	3.07e-07	0.788187	0.636363	2.15024	120	CTSK,AP1S2,GLA,CD63,DNASE2,ATP6V1H,LIPA,IGF2R,AGA,LAMP2,CTSC,CTSL,SMPD1,TCIRG1,GUSB,GBA,GNPTAB,NPC1,IDS,ACP5,M6PR,CTSS,GM2A,AP3S1,CTSG,ATP6V0B,ATP6V0D1,CD164,PPT1,ATP6AP1,AP4E1,CTSB,NEU1,ARSB,NPC2,CTSD,SORT1,TPP1,CTSH,CLTA,AP3B1,MCOLN1,SLC11A2,CD68,HEXB,DNASE2B,LAPTM5,NAGLU,CLTC,CTSZ
KEGG_OXIDATIVE_PHOSPHORYLATION	9.4e-09	7.76e-07	0.74774	0.646602	2.15313	108	ATP6V1H,ATP6V1E1,NDUFB2,ATP6V1D,COX5B,ATP6V1F,ATP6V1B2,ATP5F1E,COX4I1,TCIRG1,COX17,UQCRC1,ATP6V0E1,ATP6V1G1,COX7B,ATP6V0B,ATP6V0D1,SDHD,COX8A,ATP6V1A,ATP6V1C1,NDUFA1,ATP6AP1,UQCRFS1,SDHB,NDUFA2,NDUFS1,COX6B1,COX6C,NDUFB5,ATP5MC3,UQCRC2,COX7A2,PPA2,COX6A1,NDUFS4,COX5A,NDUFA5,ATP5PD,NDUFA8,ATP5F1B,NDUFS3,NDUFB9,ATP5MF,COX7C,ATP5F1C,NDUFB3,NDUFB4,UQCRB,ATP5PF,SDHA,NDUFS2,COX7A2L,UQCRQ,COX10
KEGG_CYTOKINE_CYTOKINE_RECEPTOR_INTERACTION	5.83e-07	2.4e-05	0.659444	0.530675	1.91004	181	TNFSF4,CCL2,IL13RA1,TNFSF10,CXCL2,CXCL3,CXCL12,IL23R,CXCL8,HGF,CSF1,IL18,IL22RA2,IL1R2,CCR5,CCL7,TNFSF14,IL6,CD70,TNFRSF11B,IFNLR1,ACVR1B,IL24,CCL22,IL12RB1,CCL3L1,CCL20,IL1A,IL2RG,IL1R1,CCL4,CCL3,CCL4L2,IFNAR1,INHBA,ACVRL1,KIT,TNFSF13,CCL18,ACVR1,CXCL5,CXCL1,TNFSF9,PDGFRB,KITLG,TSLP,IL17RA,TNFSF15,IL3RA,OSM,CNTF,LEPR,IL19,IL7R,CX3CL1,IL2RA,EDA,CCL26
KEGG_VIBRIO_CHOLERAE_INFECTION	4.55e-07	2.4e-05	0.674963	0.731574	2.15103	50	PRKX,ACTB,PRKCB,ATP6V1H,ATP6V1E1,ATP6V1D,ATP6V1F,ATP6V1B2,TCIRG1,ERO1A,ATP6V0E1,ATP6V1G1,ATP6V0B,ATP6V0D1,ATP6V1A,ATP6V1C1,ATP6AP1
KEGG_PARKINSONS_DISEASE	8.8e-07	2.9e-05	0.659444	0.602667	2.00925	103	UBA1,NDUFB2,COX5B,ATP5F1E,COX4I1,SLC18A2,SNCA,UQCRC1,SLC25A5,COX7B,CASP9,SDHD,COX8A,PINK1,NDUFA1,UQCRFS1,SDHB,NDUFA2,NDUFS1,COX6B1,COX6C,NDUFB5,ATP5MC3,UQCRC2,COX7A2,PPID,SLC25A6,COX6A1,NDUFS4,COX5A,NDUFA5,ATP5PD,NDUFA8,ATP5F1B,NDUFS3,NDUFB9,UBB,COX7C,ATP5F1C,NDUFB3,NDUFB4,VDAC1,UBE2L6,UQCRB,ATP5PF,SDHA,NDUFS2,COX7A2L,UQCRQ,NDUFB6,LRRK2
KEGG_HEMATOPOIETIC_CELL_LINEAGE	5.73e-06	0.000157451	0.610527	0.674402	2.02875	58	TFRC,CD1E,CD1B,CSF1,CD1A,IL1R2,CR1,IL6,CD55,CD22,IL1A,CD1C,CD9,HLA-DRB1,ITGAM,IL1R1,HLA-DRB5,KIT,HLA-DRA,ITGA5,ITGB3,KITLG,CD1D,IL3RA,CD14,IL7R,IL2RA,GP5,CSF2RA,IL7,CD37,ANPEP,CD33,EPOR
KEGG_GLYCOLYSIS_GLUCONEOGENESIS	5.58e-05	0.00126433	0.557332	0.678171	1.94209	44	FBP1,PGK1,TPI1,HK3,GPI,PKM,PCK2,LDHA,ENO1,HK2,ALDH1A3,ALDH9A1,DLAT,PGAM1,AKR1A1,PGM2,ENO2,PDHA1,ENO3,GAPDH
KEGG_GRAFT_VERSUS_HOST_DISEASE	6.13e-05	0.00126433	0.538434	0.770498	1.9833	25	IL6,HLA-B,IL1A,HLA-C,HLA-DMA,HLA-DRB1,HLA-DRB5,HLA-DQB1,HLA-DPB1,HLA-DRA,HLA-A,HLA-G,HLA-DMB,HLA-E,HLA-F,HLA-DPA1
KEGG_ALZHEIMERS_DISEASE	9.22e-05	0.00168986	0.538434	0.498281	1.72248	144	CACNA1C,NDUFB2,GRIN2D,COX5B,ATP5F1E,COX4I1,APOE,SNCA,UQCRC1,COX7B,CASP9,SDHD,COX8A,NDUFA1,UQCRFS1,SDHB,NDUFA2,NDUFS1,ATP2A3,COX6B1,COX6C,NDUFB5,ATP5MC3,UQCRC2,COX7A2,CASP7,COX6A1,NDUFS4,COX5A,NDUFA5,IDE,ITPR1,ATP5PD,ATP2A2,CHP1,CALM3,NDUFA8,ATP5F1B,CALM1,NDUFS3,PPP3R1,NDUFB9,ITPR2,LPL,GAPDH,COX7C,PSEN2,ATP5F1C,NDUFB3,NDUFB4,NCSTN,UQCRB,ATP5PF,SDHA,NDUFS2,ERN1,ADAM10,COX7A2L,UQCRQ
KEGG_HUNTINGTONS_DISEASE	0.000122432	0.001884	0.518848	0.487395	1.7135	158	NDUFB2,COX5B,ATP5F1E,COX4I1,UQCRC1,SLC25A5,COX7B,CASP9,SDHD,COX8A,TGM2,NDUFA1,UQCRFS1,SDHB,NDUFA2,NDUFS1,COX6B1,COX6C,NDUFB5,ATP5MC3,UQCRC2,COX7A2,PPID,CLTA,SLC25A6,COX6A1,NDUFS4,COX5A,NDUFA5,ITPR1,ATP5PD,PPARG,POLR2J2,NDUFA8,ATP5F1B,NDUFS3,CLTC,NDUFB9,POLR2G,POLR2K,POLR2J,POLR2A,COX7C,ATP5F1C,NDUFB3,EP300,NDUFB4,VDAC1,UQCRB,ATP5PF,SDHA,NDUFS2,COX7A2L,UQCRQ,REST,AP2S1,NDUFB6,ATP5PB,SDHC,CREB3L2,S…
KEGG_AUTOIMMUNE_THYROID_DISEASE	0.0001256	0.001884	0.518848	0.756342	1.94687	25	HLA-B,HLA-C,HLA-DMA,HLA-DRB1,HLA-DRB5,HLA-DQB1,HLA-DPB1,HLA-DRA,HLA-A,HLA-G,HLA-DMB,HLA-E,HLA-F,HLA-DPA1
KEGG_AXON_GUIDANCE	0.000204281	0.00280886	0.518848	-0.494083	-1.65423	124	SEMA5A,SEMA4F,RHOD,RAC3,SEMA3B,SEMA4G,EPHA1,SEMA4A,GNAI1,NGEF,LRRC4C,SEMA4C,EFNB3,EFNB2,EPHB4,L1CAM,ROBO3,EPHA4,PLXNB1,SEMA3E,SLIT2,EFNA2,PTK2,CFL2,PLXNB3,EFNA5,NTNG1,EFNA4,NFATC4,PAK4,SEMA6C,EPHA7,SEMA5B,EFNA3,NTN1,UNC5D,EFNA1,SLIT1,ABLIM2,SEMA6A
KEGG_ASTHMA	0.000424607	0.00538924	0.498493	0.787065	1.85973	18	MS4A2,HLA-DMA,HLA-DRB1,HLA-DRB5,HLA-DQB1,HLA-DPB1,FCER1G,HLA-DRA,FCER1A,HLA-DMB,HLA-DPA1
KEGG_TOLL_LIKE_RECEPTOR_SIGNALING_PATHWAY	0.000460925	0.00543234	0.498493	0.542648	1.75384	84	CTSK,SPP1,TLR8,MYD88,CXCL8,PIK3CB,IL6,MAP2K1,CCL4,CCL3,IFNAR1,TLR7,TBK1,MAP2K3,MAPK14,CHUK,PIK3CA,CD14,TLR1,MAP3K8,STAT1,TLR4,RIPK1,NFKBIA,PIK3CG,TLR3,CD80,MAP2K4
KEGG_ALLOGRAFT_REJECTION	0.00050845	0.00559296	0.477271	0.728883	1.89948	26	HLA-B,HLA-C,HLA-DMA,HLA-DRB1,HLA-DRB5,HLA-DQB1,HLA-DPB1,HLA-DRA,HLA-A,HLA-G,HLA-DMB,HLA-E,HLA-F,HLA-DPA1
KEGG_CITRATE_CYCLE_TCA_CYCLE	0.000812892	0.00838294	0.477271	0.694463	1.86074	28	ACO2,MDH1,PCK2,SDHD,SDHB,DLST,PC,DLAT,SUCLG2,PDHA1,SUCLG1,IDH3A,SDHA,IDH1,IDH3G,SUCLA2,MDH2,SDHC,ACO1,DLD
KEGG_ANTIGEN_PROCESSING_AND_PRESENTATION	0.000991845	0.00962673	0.45506	0.589553	1.74445	53	CTSL,HLA-B,CTSS,HLA-C,HLA-DMA,HLA-DRB1,HLA-DRB5,HLA-DQB1,CTSB,HLA-DPB1,HLA-DRA,HLA-A,HLA-G,TAP2,HLA-DMB,HLA-E,HLA-F,B2M,HLA-DPA1,IFI30,TAP1,CANX
KEGG_TYPE_I_DIABETES_MELLITUS	0.00122176	0.0111994	0.45506	0.672045	1.82516	33	HLA-B,IL1A,HLA-C,HLA-DMA,HLA-DRB1,HLA-DRB5,HLA-DQB1,PTPRN2,HLA-DPB1,HLA-DRA,HLA-A,HLA-G,HLA-DMB,HLA-E,HLA-F,HLA-DPA1,PTPRN
KEGG_APOPTOSIS	0.00191326	0.0166152	0.45506	0.511713	1.65277	80	AIFM1,PRKX,XIAP,TNFSF10,MYD88,PIK3CB,IRAK3,IL1A,CASP9,IL1R1,CASP7,PRKAR1A,CHP1,CHUK,PPP3R1,IL3RA,PIK3CA
KEGG_JAK_STAT_SIGNALING_PATHWAY	0.00277799	0.0229184	0.431708	0.473614	1.59392	111	IL13RA1,IL23R,CBLB,PIK3CB,IL22RA2,IL6,IFNLR1,IL24,IL12RB1,IL2RG,CCND3,SOCS5,SOS2,IFNAR1,JAK2,STAT6,STAM2,TSLP,PIAS1,SPRY3,IL3RA,OSM,CNTF,LEPR,PIK3CA,JAK3,STAT2,IL19,PIM1,IL7R,EP300,IL2RA,SOCS4,PTPN11,PIAS2,STAT1,CSF2RA,IL7,CSF2RB,PIK3CG,IL10RB,STAM,JAK1,EPOR
KEGG_LEISHMANIA_INFECTION	0.00323168	0.0253918	0.431708	0.530649	1.62984	65	PRKCB,MYD88,NCF2,CR1,FCGR3A,IL1A,HLA-DMA,HLA-DRB1,ITGAM,HLA-DRB5,HLA-DQB1,JAK2,FCGR3B,HLA-DPB1,HLA-DRA,MAPK14,ITGB1,HLA-DMB,ITGB2,HLA-DPA1,STAT1,TLR4,NFKBIA,PTGS2,JAK1,PTPN6,IFNGR1,ITGA4,IL1B,NFKBIB,MAPK1,C3,IRAK4,IL12A,CYBA
KEGG_CARDIAC_MUSCLE_CONTRACTION	0.00582809	0.0437107	0.407018	0.531816	1.58492	55	CACNA1C,CACNA2D1,ATP1B3,COX5B,COX4I1,TPM4,ATP1A1,SLC9A6,UQCRC1,COX7B,CACNB4,COX8A,UQCRFS1,COX6B1,COX6C,UQCRC2,COX7A2,SLC8A1,COX6A1,COX5A,ATP2A2
KEGG_AMINO_SUGAR_AND_NUCLEOTIDE_SUGAR_METABOLISM	0.00638401	0.0457983	0.407018	0.57887	1.66214	43	CHIT1,HK3,GPI,NANS,CMAS,HK2,GALK2,NANP,HEXB,PGM2,FPGT,GMDS,GFPT1,GALK1,NPL,RENBP,HK1,GNE,HEXA,GNPNAT1,UGP2,GNPDA1,UGDH,GMPPA,GMPPB,CYB5R1
KEGG_GLYCOSPHINGOLIPID_BIOSYNTHESIS_LACTO_AND_NEOLACTO_SERIES	0.00696123	0.0478584	0.407018	-0.657151	-1.65873	24	FUT3,B3GNT3,B3GALT2,ABO,B3GNT4,FUT1,FUT2,B4GALT2,B3GALT5
KEGG_EPITHELIAL_CELL_SIGNALING_IN_HELICOBACTER_PYLORI_INFECTION	0.00786693	0.0499248	0.38073	0.505347	1.55212	65	ATP6V1H,CXCL8,ATP6V1E1,ATP6V1D,ATP6V1F,ATP6V1B2,TCIRG1,ATP6V0E1,ATP6V1G1,ATP6V0B,ATP6V0D1,ATP6V1A,ATP6V1C1,ATP6AP1,CXCL1,MAPK14,CHUK
KEGG_LONG_TERM_POTENTIATION	0.00786693	0.0499248	0.38073	0.51127	1.55031	60	PRKX,PRKCB,CACNA1C,GRIN2D,PPP1CA,MAP2K1,GRM1,PPP1CB,RPS6KA3,RPS6KA1,ITPR1,CHP1,CALM3,CALM1,PPP3R1,ITPR2,ADCY8,EP300,NRAS,KRAS,PRKCA
KEGG_HISTIDINE_METABOLISM	0.00898095	0.0548836	0.38073	0.664735	1.64529	22	AOC1,HDC,HNMT,ALDH1A3,ALDH9A1,HAL
KEGG_NOD_LIKE_RECEPTOR_SIGNALING_PATHWAY	0.0110428	0.0650734	0.38073	0.504393	1.52119	59	CCL2,XIAP,CXCL2,CXCL8,IL18,CCL7,IL6,CARD6,MEFV,CXCL1,MAPK14,CHUK,RIPK2
KEGG_INTESTINAL_IMMUNE_NETWORK_FOR_IGA_PRODUCTION	0.0119066	0.0677447	0.38073	0.606685	1.63893	32	CXCL12,IL6,HLA-DMA,HLA-DRB1,HLA-DRB5,HLA-DQB1,TNFSF13,PIGR,HLA-DPB1,HLA-DRA,HLA-DMB
KEGG_STARCH_AND_SUCROSE_METABOLISM	0.0155338	0.0854358	0.38073	0.615975	1.58555	25	ENPP1,GBE1,GUSB,HK3,GPI,HK2,PGM2
KEGG_SNARE_INTERACTIONS_IN_VESICULAR_TRANSPORT	0.0166412	0.0885739	0.352488	0.574278	1.61928	37	STX4,STX18,VAMP4,VTI1B,VAMP8,STX12,VAMP3,VAMP7,VTI1A,STX8,SEC22B,STX7,BNIP1,STX11,GOSR1,STX6
KEGG_BASAL_CELL_CARCINOMA	0.0174956	0.0902117	0.352488	-0.54137	-1.56963	46	FZD4,WNT11,WNT7A,WNT9A,WNT10B,WNT5B,AXIN2,WNT3,WNT2B,BMP4,SMO,WNT10A,TCF7L1,STK36,FZD2,SUFU,GLI1,FZD8,FZD6,TCF7,APC2,FZD9,FZD3
KEGG_COMPLEMENT_AND_COAGULATION_CASCADES	0.0182089	0.0910446	0.352488	0.513394	1.48757	48	SERPINA1,C1S,CR1,PROS1,CD55,C1QB,VWF,C1R,C8G,A2M
KEGG_NATURAL_KILLER_CELL_MEDIATED_CYTOTOXICITY	0.0211709	0.102741	0.352488	0.425142	1.3916	92	TNFSF10,PRKCB,NCR1,PIK3CB,FCGR3A,HLA-B,MAP2K1,HLA-C,ICAM1,NCR3,SOS2,IFNAR1,LAT,RAC2,FCGR3B,FCER1G,HLA-A,HLA-G,CHP1,HCST,PPP3R1,CD48,HLA-E,PIK3CA,ITGB2,MICB,PTPN11,NRAS,KRAS,PRKCA,PIK3CG,BRAF,PTPN6,IFNGR1
KEGG_PPAR_SIGNALING_PATHWAY	0.0223419	0.105326	0.352488	0.494297	1.4494	51	CYP27A1,MMP1,GK,OLR1,DBI,ACSL4,ACAA1,CPT2,PPARD,PCK2,FABP3,UBC,PDPK1,SCP2,PPARA,PPARG,FABP5,ACSL5,LPL
KEGG_SYSTEMIC_LUPUS_ERYTHEMATOSUS	0.027665	0.126798	0.352488	0.445502	1.40999	74	H3-3A,C1S,FCGR2B,FCGR3A,CTSG,HLA-DMA,HLA-DRB1,HLA-DRB5,C1QB,HLA-DQB1,C1R,C8G,FCGR3B,HLA-DPB1,HLA-DRA
KEGG_LEUKOCYTE_TRANSENDOTHELIAL_MIGRATION	0.0298267	0.129511	0.352488	0.405963	1.3492	100	CYBB,CD99,ACTB,PRKCB,CXCL12,MMP2,NCF2,VCAM1,PIK3CB,NOX1,MYL12A,ICAM1,ITGAM,RASSF5,RAC2,CTNNA1,MAPK14,ITGB1,ROCK1,ARHGAP5
KEGG_PENTOSE_PHOSPHATE_PATHWAY	0.02963	0.129511	0.352488	0.608379	1.53542	24	FBP1,GPI,DERA,PGM2,PRPS1,RPE,PFKL,PFKP,TALDO1,PRPS2,PRPS1L1,ALDOA,PGLS,H6PD
KEGG_CHEMOKINE_SIGNALING_PATHWAY	0.0316095	0.133732	0.321776	0.364255	1.27758	156	PRKX,CCL2,CXCL2,PRKCB,CXCL3,CXCL12,CXCL8,PIK3CB,CCR5,CCL7,MAP2K1,CCL22,CCL3L1,CCL20,CCL4,CCL3,CCL4L2,SOS2,JAK2,RAC2,CCL18,CXCL5,CXCL1,TIAM1,ROCK1,CHUK,GNB4,PIK3CA,ADCY8,JAK3,STAT2,GRK6,GRK3,CX3CL1,CCL26,FGR,ADCY4,NRAS,KRAS,STAT1,RHOA
KEGG_GLYCEROLIPID_METABOLISM	0.0350918	0.144754	0.321776	0.52247	1.4962	42	DGKI,GK,GLA,PLPP3,DGKG,GPAT3,AGPAT4,ALDH9A1,AGK,PLPP1,LIPC,AKR1A1
KEGG_REGULATION_OF_AUTOPHAGY	0.0361763	0.145588	0.321776	0.637171	1.53087	19	ATG4A,GABARAPL1,PRKAA1,ATG5,BECN1,ATG3,ATG12,ATG7,PIK3C3
KEGG_CYTOSOLIC_DNA_SENSING_PATHWAY	0.0379927	0.149257	0.321776	0.507913	1.43171	39	IL18,IL6,IL33,CCL4,STING1,CCL4L2,RIPK3,TBK1,CHUK,POLR3GL,RIPK1,NFKBIA,POLR1D
KEGG_INSULIN_SIGNALING_PATHWAY	0.0418729	0.160675	0.321776	0.386004	1.3098	123	FBP1,PRKX,PDE3A,PHKA2,CBLB,PIK3CB,INPP5K,PPP1CA,HK3,MAP2K1,PRKAA1,PCK2,HK2,SOS2,PDPK1,PPP1CB,PRKAR1A,INSR,SH2B2,PPP1R3D,CALM3,IRS2,CALM1,PDE3B,PIK3CA
KEGG_HEDGEHOG_SIGNALING_PATHWAY	0.0500928	0.187848	0.276501	-0.492987	-1.4177	44	WNT11,WNT7A,WNT9A,WNT10B,WNT5B,WNT3,WNT2B,BMP4,BMP8B,SMO,WNT10A,STK36,GAS1,SUFU,LRP2,GLI1
KEGG_VIRAL_MYOCARDITIS	0.0618102	0.216993	0.271289	0.44603	1.33769	57	ACTB,HLA-B,CD55,HLA-C,ICAM1,CASP9,HLA-DMA,HLA-DRB1,HLA-DRB5,DMD,HLA-DQB1,RAC2,HLA-DPB1,HLA-DRA,HLA-A,SGCG,HLA-G,HLA-DMB,HLA-E,HLA-F,ITGB2
KEGG_FRUCTOSE_AND_MANNOSE_METABOLISM	0.0614407	0.216993	0.266351	0.532196	1.4377	32	FBP1,TPI1,HK3,MTMR6,HK2,MTMR1,FPGT,GMDS,PFKL,PFKP,HK1
KEGG_DRUG_METABOLISM_OTHER_ENZYMES	0.0614407	0.216993	0.266351	0.568534	1.46344	25	HPRT1,CDA,GUSB,ITPA,DPYS,NAT1
KEGG_PROTEASOME	0.0679419	0.23355	0.287805	0.489042	1.40047	42	PSMB9,PSMC2,POMP,PSMB8,PSMA1,PSMC1,PSMD8,PSMA4,PSMD14,PSMB3,PSMD7,PSMB10,PSMA7,PSMC6,PSMB6,PSMD6,PSMB4,PSMD1,PSME1,PSMF1,SEM1
KEGG_GALACTOSE_METABOLISM	0.0702128	0.236431	0.248911	0.568067	1.42362	23	GLA,HK3,HK2,GALK2,PGM2,GALK1,PFKL,PFKP,HK1,GLB1,UGP2

## Sheet: Figure 5A
pathway	pval	padj		log2err	ES	NES
HALLMARK_OXIDATIVE_PHOSPHORYLATION	1e-10	5e-09	8.30103	NA	0.620643	2.26156
HALLMARK_COMPLEMENT	1.19e-09	2.98e-08	7.52578	0.788187	0.575154	2.06371
HALLMARK_TNFA_SIGNALING_VIA_NFKB	4.09e-07	5.11e-06	5.29158	0.674963	0.510393	1.85982
HALLMARK_IL6_JAK_STAT3_SIGNALING	0.00010199	0.000566613	3.24671	0.538434	0.57957	1.84442
HALLMARK_INFLAMMATORY_RESPONSE	8.04e-06	5.75e-05	4.24033	0.593325	0.494799	1.78386
HALLMARK_MTORC1_SIGNALING	0.00116143	0.00392839	2.40579	0.45506	0.408914	1.49004
KEGG_LYSOSOME	1.86e-09	3.07e-07		0.788187	0.636363	2.15024
KEGG_OXIDATIVE_PHOSPHORYLATION	9.4e-09	7.76e-07		0.74774	0.646602	2.15313
KEGG_CYTOKINE_CYTOKINE_RECEPTOR_INTERACTION	5.83e-07	2.4e-05		0.659444	0.530675	1.91004
KEGG_PARKINSONS_DISEASE	8.8e-07	2.9e-05		0.659444	0.602667	2.00925
KEGG_GLYCOLYSIS_GLUCONEOGENESIS	5.58e-05	0.00126433		0.557332	0.678171	1.94209
KEGG_ALZHEIMERS_DISEASE	9.22e-05	0.00168986		0.538434	0.498281	1.72248
KEGG_HUNTINGTONS_DISEASE	0.000122432	0.001884		0.518848	0.487395	1.7135
