# Supplementary material for: A microglia clonal inflammatory disorder in Alzheimer’s Disease
Source: bioRxiv preprint, doi:10.1101/2024.01.25.577216, version 2 (2024-08-03)
Supplement: Supplemental Table 9 [file 577216_file10.xlsx]

## Sheet: DEG_between clusters_all donors
group	genes	scores	avg_log2FC	p_val	p_val_adj	pts	pts_rest
0	GLDN	39.2475	1.47103	0	0	0.87271	0.664513
0	MYO1E	38.7001	1.68631	0	0	0.772741	0.481255
0	SLC1A3	31.8056	0.510022	5.4111e-222	4.18639e-218	1	0.99727
0	SCIN	30.0503	1.0733	2.16162e-198	1.25428e-194	0.808134	0.600157
0	SOCS6	28.6986	0.961459	3.96877e-181	1.84231e-177	0.837628	0.713058
0	OLR1	26.8691	1.14259	5.04895e-159	1.67409e-155	0.67122	0.455226
0	PLXDC2	26.3067	0.260976	1.60765e-152	4.66419e-149	1	1
0	DSCAM	25.3019	0.803886	3.04464e-141	7.85179e-138	0.87892	0.785199
0	HDAC9	25.1962	0.677773	4.40607e-140	1.02265e-136	0.957467	0.901451
0	GAS7	24.9002	1.05817	7.39614e-137	1.56059e-133	0.641416	0.416196
0	RTTN	24.4351	0.980021	7.24398e-132	1.40111e-128	0.79851	0.69584
0	MITF	24.058	0.969057	6.88845e-128	1.22985e-124	0.686433	0.49077
0	XYLT1	23.991	1.21414	3.45481e-127	5.34574e-124	0.564731	0.356542
0	NPL	23.8914	0.751073	3.76542e-126	5.46221e-123	0.808134	0.668784
0	PPARG	23.5786	1.17447	6.39345e-123	8.72895e-120	0.578392	0.375598
0	STARD13	23.3672	0.976839	9.21073e-121	1.18767e-117	0.68488	0.490256
0	ATG7	23.2189	0.611293	2.93257e-119	3.58236e-116	0.907482	0.841609
0	MTSS1	23.026	0.797202	2.56041e-117	2.97135e-114	0.789506	0.644863
0	FMNL2	21.8394	0.522119	9.80506e-106	9.89459e-103	0.965849	0.946104
0	A2M	21.0331	0.608314	3.26548e-98	3.03167e-95	0.866501	0.796227
0	ITGAX	20.9015	0.656905	5.18996e-97	4.63304e-94	0.781124	0.653702
0	FRMD4B	20.8738	0.555673	9.26514e-97	7.96459e-94	0.904378	0.823851
0	ZEB2	19.8678	0.397529	7.73051e-88	6.40804e-85	0.987271	0.973701
0	FNIP2	19.8301	0.656866	1.63802e-87	1.31098e-84	0.788575	0.677893
0	ARID5B	19.2801	1.18071	7.89282e-83	5.38801e-80	0.454207	0.273401
0	CD84	18.9312	0.661408	6.31213e-80	4.18584e-77	0.690158	0.533314
0	MERTK	18.5679	0.586085	5.84554e-77	3.66689e-74	0.851288	0.789956
0	LIMS1	18.5526	0.509139	7.7684e-77	4.62319e-74	0.886992	0.834851
0	IPCEF1	17.9763	0.488436	2.98784e-72	1.61274e-69	0.927973	0.889532
0	PLA2G7	17.91	1.10734	9.85579e-72	5.19893e-69	0.40919	0.229073
0	SMAD3	17.8487	0.727675	2.95902e-71	1.5262e-68	0.600435	0.437765
0	PDGFC	17.5832	0.707811	3.31178e-69	1.63545e-66	0.634586	0.47712
0	FARP1	17.546	0.798491	6.38499e-69	3.08741e-66	0.55728	0.393816
0	CD83	17.3613	1.83324	1.62142e-67	7.68022e-65	0.277554	0.0967916
0	DPYD	17.2603	0.689613	9.3674e-67	4.34835e-64	0.804409	0.703084
0	LRRK1	17.2071	0.432451	2.3501e-66	1.06952e-63	0.89941	0.851529
0	IFNGR1	16.7762	0.408381	3.64199e-63	1.53692e-60	0.918348	0.88818
0	TPRG1	16.7049	1.37243	1.208e-62	4.9189e-60	0.361689	0.1998
0	MGLL	16.6751	1.29161	1.98991e-62	7.96306e-60	0.333437	0.162175
0	SFMBT2	16.6326	0.288447	4.04553e-62	1.59147e-59	0.996895	0.997675
0	CDK6	16.5388	0.513946	1.92761e-61	7.45666e-59	0.809376	0.732681
0	ADK	16.4858	0.449138	4.64304e-61	1.76664e-58	0.867122	0.803119
0	DENND4C	16.2009	0.562311	4.97126e-59	1.86101e-56	0.705371	0.596967
0	LPP	16.1947	0.327621	5.49523e-59	2.02451e-56	0.96647	0.952726
0	ADAMTS17	16.1766	1.51015	7.37282e-59	2.6738e-56	0.310152	0.146579
0	SHTN1	16.0884	0.377619	3.0765e-58	1.09855e-55	0.906861	0.849582
0	ZNF804A	16.0194	1.01523	9.35968e-58	3.24236e-55	0.403291	0.238209
0	RASSF3	15.9424	0.651673	3.21982e-57	1.099e-54	0.605713	0.461443
0	ARHGAP17	15.9151	0.609114	4.98021e-57	1.67523e-54	0.619994	0.487175
0	NAP1L1	15.6998	0.601844	1.51791e-55	4.96206e-53	0.627755	0.500419
0	SNX24	15.6368	0.650106	4.08643e-55	1.31731e-52	0.579944	0.434143
0	MAP4K3	15.62	0.476762	5.32139e-55	1.69191e-52	0.768395	0.684515
0	RBM47	15.5383	0.365054	1.90966e-54	5.98962e-52	0.930767	0.891099
0	LPL	15.4681	2.48684	5.69741e-54	1.76316e-51	0.212356	0.050842
0	LINC00278	15.1701	0.647741	5.57894e-52	1.66009e-49	0.615958	0.491932
0	PTPRJ	15.0764	0.319899	2.31681e-51	6.80673e-49	0.981683	0.964159
0	PEAK1	14.9696	0.549554	1.16078e-50	3.32614e-48	0.773362	0.704787
0	FNDC3B	14.855	0.405726	6.45211e-50	1.78278e-47	0.851599	0.795335
0	CPM	14.7754	0.744654	2.11031e-49	5.69539e-47	0.560695	0.438576
0	OPRM1	14.4732	0.871939	1.79073e-47	4.56735e-45	0.420366	0.28205
0	PAG1	14.423	0.325086	3.70893e-47	9.35697e-45	0.950947	0.925994
0	APOE	14.4088	0.522907	4.55505e-47	1.1368e-44	0.672152	0.541503
0	SAMD4A	14.2357	0.665452	5.50402e-46	1.34472e-43	0.554797	0.435603
0	ARFIP1	14.2136	0.490469	7.54171e-46	1.82336e-43	0.679292	0.56583
0	SPIRE1	14.0656	0.699412	6.17694e-45	1.46293e-42	0.472214	0.334162
0	LINC01141	14.0045	0.530519	1.46248e-44	3.42871e-42	0.638001	0.525935
0	RP11-41O4.1	13.8994	1.0394	6.38622e-44	1.46757e-41	0.318224	0.174122
0	GUCY1A3	13.8083	0.813652	2.27207e-43	5.07066e-41	0.395529	0.255805
0	CYTH3	13.7982	0.693035	2.61157e-43	5.71836e-41	0.486495	0.359191
0	ARHGEF10L	13.7618	0.619777	4.32636e-43	9.38457e-41	0.511642	0.380193
0	PADI2	13.6745	0.489621	1.44146e-42	3.06938e-40	0.757218	0.692543
0	LIPA	13.6604	0.687231	1.7513e-42	3.69524e-40	0.468799	0.335595
0	GPNMB	13.5785	1.12957	5.37341e-42	1.12357e-39	0.286867	0.144309
0	SAMSN1	13.3219	0.395201	1.72727e-40	3.51665e-38	0.820242	0.775036
0	ASAP1	13.3201	0.530509	1.76824e-40	3.56876e-38	0.666874	0.583669
0	C22ORF34	13.1981	0.598736	8.99832e-40	1.76992e-37	0.510711	0.37349
0	KCNJ5	13.0398	1.00093	7.26057e-39	1.40432e-36	0.297423	0.160256
0	PRKCE	12.8795	0.517169	5.87453e-38	1.12684e-35	0.61751	0.508582
0	PLEK	12.8145	0.627755	1.36066e-37	2.58859e-35	0.475318	0.349947
0	FAM20C	12.7494	0.803577	3.14108e-37	5.83235e-35	0.377833	0.251885
0	NR3C1	12.6973	0.384703	6.11736e-37	1.11798e-34	0.784229	0.699516
0	UST	12.6459	0.540441	1.1781e-36	2.11966e-34	0.57063	0.453334
0	CPQ	12.524	0.398194	5.51642e-36	9.62677e-34	0.763738	0.690083
0	ABHD2	12.4553	0.628643	1.30911e-35	2.22861e-33	0.488358	0.37576
0	MAFB	12.4549	0.999404	1.31546e-35	2.22861e-33	0.288109	0.157094
0	ATP6V0A1	12.4181	0.457707	2.08559e-35	3.50772e-33	0.63086	0.516015
0	TMEM144	12.3569	0.881384	4.47291e-35	7.46879e-33	0.34927	0.230289
0	UBE2J1	12.3334	0.945787	5.98809e-35	9.9274e-33	0.305185	0.178933
0	KCNQ3	12.3269	0.326255	6.48759e-35	1.06792e-32	0.941012	0.925021
0	SH3RF1	12.2744	0.608782	1.24276e-34	2.0313e-32	0.467557	0.34319
0	RASA1	12.2462	0.311729	1.75975e-34	2.81682e-32	0.874263	0.831257
0	ASAH1	12.1277	0.418522	7.53568e-34	1.17385e-31	0.674635	0.575155
0	NCOA7	12.082	0.518016	1.31492e-33	2.02115e-31	0.544551	0.431197
0	GYPC	11.8709	0.747141	1.67741e-32	2.51179e-30	0.357653	0.237344
0	TREM2	11.8647	0.777632	1.80506e-32	2.68561e-30	0.334058	0.209882
0	P2RX4	11.8599	0.570132	1.91186e-32	2.82639e-30	0.44986	0.32827
0	EPS8	11.8586	0.335777	1.94197e-32	2.85273e-30	0.835455	0.794335
0	TGFBR1	11.8229	0.306454	2.97293e-32	4.33973e-30	0.885129	0.865286
0	RAPH1	11.8062	0.39144	3.62771e-32	5.22976e-30	0.711891	0.628294
0	KLF6	11.7815	0.560909	4.8625e-32	6.96658e-30	0.479665	0.368976
0	VSIG4	11.6105	0.467174	3.64395e-31	5.09495e-29	0.594536	0.485553
0	ALCAM	11.4674	0.452187	1.92353e-30	2.62619e-28	0.71127	0.655513
0	OSBPL3	11.4543	0.302734	2.2382e-30	3.03794e-28	0.878299	0.82777
0	CACNA1A	11.4182	0.405383	3.39139e-30	4.54996e-28	0.752251	0.694408
0	STK10	11.3429	0.387702	8.04607e-30	1.06107e-27	0.671531	0.564451
0	RIN2	11.3327	0.332301	9.04145e-30	1.1856e-27	0.783918	0.732978
0	TNFAIP2	11.2903	0.854828	1.46524e-29	1.91058e-27	0.301149	0.186123
0	HECTD2	11.2622	0.426631	2.01619e-29	2.59976e-27	0.614095	0.514366
0	ZC3H12C	11.2399	0.604441	2.59694e-29	3.33011e-27	0.417883	0.306349
0	ABCA1	11.2384	0.560325	2.64073e-29	3.36766e-27	0.474697	0.363678
0	C20ORF194	11.2354	0.314999	2.73162e-29	3.46453e-27	0.795716	0.737465
0	ACER3	11.2032	0.392669	3.93246e-29	4.93365e-27	0.692021	0.620212
0	GNB4	11.1983	0.303286	4.15602e-29	5.15836e-27	0.833903	0.789848
0	EEPD1	11.1747	0.919209	5.42098e-29	6.69261e-27	0.311704	0.201341
0	WIPF3	11.1207	0.838987	9.95249e-29	1.22221e-26	0.310463	0.196962
0	RASA3	10.9691	0.39909	5.37874e-28	6.57056e-26	0.641105	0.551774
0	UGCG	10.8837	0.409181	1.3787e-27	1.67538e-25	0.623719	0.519502
0	GAREM1	10.8758	0.38322	1.50297e-27	1.81687e-25	0.705061	0.636322
0	SLC25A13	10.8657	0.339681	1.67876e-27	2.01886e-25	0.729587	0.64535
0	PTPRG	10.7998	1.47424	3.45116e-27	4.10776e-25	0.236883	0.130389
0	CYTH1	10.7171	0.347877	8.45836e-27	9.96541e-25	0.733313	0.64735
0	NAGK	10.684	0.513393	1.20952e-26	1.41071e-24	0.43651	0.327432
0	CHSY3	10.5663	0.407931	4.26833e-26	4.88019e-24	0.687054	0.625618
0	FAM107B	10.3927	0.883921	2.67582e-25	2.98586e-23	0.276312	0.170338
0	SCARB2	10.3171	0.424131	5.89881e-25	6.55078e-23	0.549829	0.450036
0	GPATCH2L	10.3115	0.325674	6.25129e-25	6.90916e-23	0.720273	0.640971
0	ATP1B3	10.2658	0.530557	1.00476e-24	1.10002e-22	0.408569	0.301997
0	CDK17	10.2533	0.43884	1.14355e-24	1.24609e-22	0.533064	0.431981
0	SLC11A2	10.1689	0.347912	2.72849e-24	2.93186e-22	0.658491	0.568884
0	ARHGAP20	10.1653	0.806951	2.83164e-24	3.02868e-22	0.313878	0.213504
0	H2AFY	10.1639	0.274803	2.87323e-24	3.05907e-22	0.815585	0.765576
0	DOPEY2	10.1619	0.487677	2.93158e-24	3.10694e-22	0.463521	0.364949
0	RGL1	10.1344	0.541962	3.88878e-24	4.10267e-22	0.396771	0.287753
0	EML4	10.1241	0.271599	4.31857e-24	4.53548e-22	0.838249	0.804011
0	MAP4	10.0804	0.375325	6.74287e-24	7.01803e-22	0.606333	0.513555
0	RABEP1	10.0438	0.312595	9.78453e-24	1.01383e-21	0.735796	0.658783
0	PDPN	10.0121	0.807809	1.34866e-23	1.38506e-21	0.270413	0.165284
0	ABCC5	10.0053	0.518201	1.44476e-23	1.47722e-21	0.42254	0.321891
0	DHRS9	9.99395	0.853769	1.61998e-23	1.6277e-21	0.258305	0.153229
0	ELL2	9.9935	0.2752	1.62731e-23	1.62801e-21	0.842285	0.81112
0	RASGRP3	9.93619	0.725698	2.8969e-23	2.84902e-21	0.31512	0.213477
0	BP-21264C1.2	9.92855	0.623019	3.12777e-23	3.0631e-21	0.341509	0.238938
0	NFX1	9.92712	0.391569	3.17298e-23	3.09432e-21	0.564731	0.468038
0	PRKCB	9.88735	0.326264	4.72357e-23	4.58719e-21	0.741695	0.672919
0	NAV2	9.7634	0.649323	1.61643e-22	1.55673e-20	0.375039	0.279401
0	BCL2	9.66244	0.325206	4.35375e-22	4.14142e-20	0.755045	0.727924
0	FBXW7	9.66136	0.311626	4.39993e-22	4.16826e-20	0.75194	0.687002
0	GSAP	9.64207	0.339109	5.31069e-22	4.99033e-20	0.654455	0.575587
0	PCLO	9.51148	0.940094	1.8797e-21	1.73816e-19	0.244024	0.146444
0	HRH1	9.47971	1.84951	2.54999e-21	2.34862e-19	0.146849	0.0469498
0	HPCAL1	9.47429	0.571168	2.68576e-21	2.4639e-19	0.351133	0.252642
0	ADARB1	9.47171	1.01025	2.75292e-21	2.51557e-19	0.229742	0.132578
0	HIVEP1	9.45797	1.08912	3.13988e-21	2.84675e-19	0.207079	0.108171
0	PHACTR1	9.44684	0.461014	3.49209e-21	3.14152e-19	0.484632	0.395032
0	SPATS2L	9.42435	0.494337	4.32792e-21	3.87842e-19	0.414468	0.318053
0	GALNT1	9.41654	0.357648	4.66197e-21	4.16171e-19	0.624961	0.543855
0	GOLIM4	9.409	0.561243	5.00897e-21	4.45434e-19	0.364483	0.26813
0	GLCE	9.34567	0.429008	9.13082e-21	8.08879e-19	0.48339	0.391843
0	ENPP1	9.3382	0.874778	9.79888e-21	8.64761e-19	0.280037	0.188583
0	RASGEF1B	9.2913	0.331111	1.52417e-20	1.33494e-18	0.649177	0.575209
0	LIPG	9.28235	1.26559	1.65786e-20	1.44116e-18	0.184415	0.0877098
0	GPD2	9.26617	0.347439	1.92946e-20	1.671e-18	0.608507	0.526664
0	RHEB	9.21558	0.519923	3.09589e-20	2.66132e-18	0.380627	0.285834
0	SUSD1	9.19655	0.687472	3.69622e-20	3.16565e-18	0.304564	0.212098
0	FPR3	9.15471	0.890733	5.4506e-20	4.6171e-18	0.220118	0.122415
0	ENO4	9.1432	0.704377	6.06293e-20	5.11711e-18	0.273518	0.177825
0	FAM129A	9.11752	0.432443	7.6861e-20	6.41706e-18	0.488047	0.396005
0	TMEM117	9.0936	0.328328	9.58139e-20	7.97075e-18	0.679292	0.625699
0	MAN1A1	9.08429	0.347113	1.04375e-19	8.65191e-18	0.653524	0.593508
0	CBL	9.04888	0.270954	1.4444e-19	1.18461e-17	0.744489	0.682245
0	LOXL3	8.94228	0.42994	3.81214e-19	3.10455e-17	0.439925	0.346893
0	ZCCHC6	8.93714	0.333359	3.99381e-19	3.24113e-17	0.6647	0.588183
0	TIGD4	8.87696	1.31247	6.87144e-19	5.49952e-17	0.16796	0.074952
0	SOAT1	8.8616	0.301834	7.88739e-19	6.248e-17	0.667805	0.599184
0	ADAM9	8.84418	0.332452	9.22044e-19	7.25445e-17	0.596399	0.514853
0	DTNA	8.8317	0.260096	1.03095e-18	8.08392e-17	0.82552	0.785145
0	RNF19A	8.81421	0.457636	1.20531e-18	9.41931e-17	0.418193	0.329838
0	ARFGEF2	8.80399	0.357135	1.32033e-18	1.0215e-16	0.527476	0.439684
0	FCGR1A	8.79329	0.38946	1.45248e-18	1.12001e-16	0.478112	0.383896
0	FAR1	8.79171	0.293652	1.47303e-18	1.13209e-16	0.666563	0.58994
0	FKBP15	8.70422	0.307277	3.19771e-18	2.44141e-16	0.618752	0.534476
0	FLT1	8.69279	0.67136	3.53644e-18	2.68711e-16	0.314809	0.227559
0	ABI2	8.69259	0.394809	3.54268e-18	2.68711e-16	0.478112	0.395437
0	CBFB	8.66607	0.316138	4.47296e-18	3.35979e-16	0.606644	0.52707
0	KLF7	8.6601	0.415544	4.71339e-18	3.51761e-16	0.467557	0.383545
0	DLGAP4	8.63	0.67646	6.13504e-18	4.52045e-16	0.26824	0.177744
0	NHSL1	8.56108	0.397189	1.11818e-17	8.13573e-16	0.676498	0.646431
0	MSR1	8.52909	0.29981	1.47502e-17	1.06321e-15	0.662527	0.581885
0	GPR34	8.52724	0.32943	1.49875e-17	1.07697e-15	0.580876	0.491229
0	ADAM17	8.41921	0.308519	3.79026e-17	2.68207e-15	0.614095	0.549315
0	ZNF618	8.41666	0.35583	3.87356e-17	2.73269e-15	0.532443	0.454442
0	ARHGAP18	8.41411	0.376633	3.9588e-17	2.78436e-15	0.520335	0.445442
0	PDGFB	8.40186	0.388766	4.39471e-17	3.08161e-15	0.427817	0.338757
0	ARL8B	8.39148	0.336337	4.80054e-17	3.35604e-15	0.533064	0.446225
0	LGALS9	8.31821	0.422619	8.93022e-17	6.07831e-15	0.401739	0.315458
0	SIRPA	8.30579	0.324878	9.91571e-17	6.70973e-15	0.565663	0.489067
0	GSR	8.29806	0.614889	1.05829e-16	7.14036e-15	0.282521	0.1958
0	CCDC92	8.27073	0.530701	1.33137e-16	8.95683e-15	0.321639	0.23556
0	LCP2	8.26516	0.310327	1.39503e-16	9.35796e-15	0.610369	0.535692
0	RP11-305L7.3	8.2213	0.415155	2.01308e-16	1.34263e-14	0.448308	0.364678
0	CORO1C	8.21713	0.322689	2.08426e-16	1.38217e-14	0.559143	0.47739
0	PPT1	8.20929	0.452812	2.22493e-16	1.46291e-14	0.370382	0.286348
0	LRRC37A3	8.18467	0.290237	2.73045e-16	1.78517e-14	0.605402	0.52734
0	SH3PXD2A	8.17715	0.80457	2.90639e-16	1.89487e-14	0.213288	0.126551
0	CD276	8.17418	0.528012	2.97884e-16	1.93666e-14	0.311394	0.225126
0	HM13	8.15756	0.362589	3.41868e-16	2.21541e-14	0.489289	0.411141
0	RP11-419I17.1	8.1563	0.332233	3.45432e-16	2.22708e-14	0.537411	0.45282
0	FRRS1	8.13967	0.640713	3.96347e-16	2.54826e-14	0.264204	0.178798
0	RNGTT	8.05308	0.28788	8.07355e-16	5.13389e-14	0.633654	0.549882
0	NUAK1	8.04988	0.300111	8.28764e-16	5.25563e-14	0.600435	0.529232
0	MORC1	8.02485	0.918157	1.01654e-15	6.41135e-14	0.198075	0.114253
0	GALNT11	7.99984	0.369103	1.24583e-15	7.794e-14	0.458864	0.378409
0	NAA20	7.99772	0.426006	1.26743e-15	7.90778e-14	0.384042	0.300619
0	ARSB	7.99638	0.333479	1.28129e-15	7.97286e-14	0.525924	0.443009
0	CREG1	7.97806	0.411965	1.48652e-15	9.20055e-14	0.413536	0.332676
0	PITPNB	7.95402	0.339559	1.80548e-15	1.1145e-13	0.50978	0.433819
0	UTP6	7.94186	0.41148	1.99174e-15	1.22622e-13	0.379385	0.295186
0	FCGR1B	7.92178	0.457589	2.34127e-15	1.43002e-13	0.346787	0.263373
0	SGPP1	7.88961	0.356567	3.03144e-15	1.83707e-13	0.484322	0.407655
0	ALDH1A2	7.88827	1.07498	3.06394e-15	1.85193e-13	0.22136	0.144282
0	SLC7A1	7.86314	0.996163	3.74629e-15	2.25263e-13	0.179758	0.0973052
0	GPRIN3	7.86219	0.258582	3.7749e-15	2.26397e-13	0.705681	0.66181
0	USO1	7.81635	0.30958	5.43786e-15	3.21971e-13	0.520025	0.43636
0	SLC37A2	7.80629	0.63875	5.88978e-15	3.47842e-13	0.257063	0.175528
0	FBXO38	7.77158	0.356949	7.75155e-15	4.54327e-13	0.447066	0.367733
0	APOC1	7.74751	0.51778	9.37133e-15	5.47881e-13	0.290593	0.207828
0	NOTCH2	7.73108	0.315102	1.06634e-14	6.20296e-13	0.518162	0.437981
0	ANXA5	7.69021	0.43615	1.46894e-14	8.48112e-13	0.363241	0.284239
0	HEG1	7.66503	0.704222	1.78786e-14	1.02968e-12	0.237814	0.15804
0	GPX1	7.64329	0.388439	2.11738e-14	1.21045e-12	0.393977	0.312863
0	HS2ST1	7.53317	0.497355	4.95216e-14	2.77632e-12	0.316361	0.238263
0	RAP2A	7.53255	0.338604	4.97581e-14	2.78285e-12	0.448308	0.367084
0	USP9Y	7.50926	0.304645	5.94621e-14	3.31758e-12	0.521577	0.440603
0	VAPA	7.43344	0.282272	1.05806e-13	5.8193e-12	0.554797	0.47785
0	REV1	7.4232	0.279329	1.14328e-13	6.25835e-12	0.559764	0.478931
0	ABHD12	7.41576	0.27144	1.20926e-13	6.60398e-12	0.62434	0.55418
0	DMXL2	7.37189	0.321961	1.68223e-13	9.08014e-12	0.505123	0.430251
0	FAM35A	7.3696	0.407299	1.71138e-13	9.20735e-12	0.362931	0.28451
0	EHD4	7.36268	0.46357	1.80259e-13	9.66237e-12	0.319776	0.242128
0	TWSG1	7.35303	0.722108	1.93765e-13	1.03386e-11	0.215151	0.137687
0	ANKMY1	7.33023	0.319413	2.29762e-13	1.21753e-11	0.472524	0.3946
0	PDCD6IP	7.32137	0.253374	2.45459e-13	1.29775e-11	0.629618	0.554558
0	CBWD2	7.32099	0.361824	2.46151e-13	1.29845e-11	0.411363	0.336325
0	SPAG9	7.30431	0.256168	2.78691e-13	1.46676e-11	0.622167	0.552072
0	HS6ST1	7.2593	0.423345	3.89106e-13	2.03404e-11	0.334058	0.256561
0	CREB3L2	7.22867	0.307245	4.87764e-13	2.54404e-11	0.484322	0.40679
0	PER3	7.21857	0.482423	5.25358e-13	2.73398e-11	0.28873	0.210287
0	HVCN1	7.21072	0.556758	5.5658e-13	2.88998e-11	0.260168	0.183961
0	MYO5A	7.20911	0.257346	5.63197e-13	2.91781e-11	0.64452	0.578425
0	HAVCR2	7.19916	0.254782	6.05865e-13	3.12492e-11	0.616579	0.557586
0	NPTN	7.15428	0.286401	8.41107e-13	4.28116e-11	0.519404	0.439982
0	PDLIM5	7.13652	0.39773	9.57255e-13	4.85107e-11	0.356101	0.27932
0	AKR1A1	7.13216	0.422414	9.88031e-13	4.99612e-11	0.331264	0.255399
0	NBPF1	7.1268	0.273405	1.02732e-12	5.18348e-11	0.529339	0.453334
0	SDK1	7.10409	0.259747	1.21114e-12	6.08455e-11	0.746042	0.722869
0	ITGAL	7.06253	0.416678	1.63494e-12	8.14311e-11	0.349581	0.277563
0	AGPS	7.03172	0.260437	2.03997e-12	1.01387e-10	0.564111	0.487553
0	TEX2	7.02117	0.606733	2.20019e-12	1.08884e-10	0.240298	0.167068
0	ABL2	7.01491	0.308622	2.30093e-12	1.13385e-10	0.51009	0.445252
0	USP4	7.01443	0.267415	2.30887e-12	1.13536e-10	0.535238	0.462092
0	CUEDC1	7.01124	0.4558	2.36223e-12	1.15914e-10	0.306427	0.232668
0	SESN1	7.00482	0.251893	2.47304e-12	1.21095e-10	0.640174	0.574263
0	ANXA4	6.98104	0.301495	2.92998e-12	1.42568e-10	0.498603	0.427818
0	ATP6V1C1	6.97873	0.293767	2.97863e-12	1.4433e-10	0.486805	0.413493
0	MAPK8	6.97649	0.335125	3.02643e-12	1.4634e-10	0.435269	0.359867
0	CLCN6	6.96858	0.410481	3.20164e-12	1.5417e-10	0.330953	0.256778
0	BCL2L1	6.96783	0.335391	3.21858e-12	1.54665e-10	0.428438	0.356488
0	CA5B	6.96601	0.358952	3.26058e-12	1.5636e-10	0.381559	0.306187
0	PMM2	6.94776	0.372492	3.71131e-12	1.77607e-10	0.373797	0.300051
0	GCNT2	6.94325	0.273351	3.83168e-12	1.8299e-10	0.559143	0.487823
0	TXNRD1	6.93999	0.390794	3.92116e-12	1.86665e-10	0.356101	0.283401
0	TPCN1	6.93449	0.320626	4.07696e-12	1.9351e-10	0.44986	0.380869
0	ATP2A2	6.92552	0.283209	4.34377e-12	2.05753e-10	0.532443	0.468822
0	NSMAF	6.92131	0.287708	4.47493e-12	2.11104e-10	0.517231	0.443739
0	HTT	6.88196	0.252414	5.9033e-12	2.76241e-10	0.574666	0.505609
0	DDX10	6.83506	0.268906	8.19708e-12	3.79749e-10	0.566905	0.493391
0	TTC7B	6.82815	0.25746	8.60196e-12	3.97712e-10	0.573114	0.502716
0	IL6R	6.81601	0.256405	9.36021e-12	4.29448e-10	0.568767	0.494851
0	EFR3A	6.81598	0.294834	9.36238e-12	4.29448e-10	0.493946	0.425575
0	LCP1	6.81088	0.266711	9.70002e-12	4.44058e-10	0.53679	0.464686
0	IVNS1ABP	6.79909	0.322304	1.05283e-11	4.81027e-10	0.417572	0.344109
0	IFNLR1	6.7758	0.571909	1.2372e-11	5.63049e-10	0.244955	0.174176
0	ATP1B1	6.76602	0.643371	1.32376e-11	6.0126e-10	0.219497	0.149039
0	ANKH	6.76521	0.325269	1.33119e-11	6.03454e-10	0.47004	0.40606
0	PSMD1	6.75696	0.282373	1.40913e-11	6.37543e-10	0.484943	0.41152
0	IARS	6.71795	0.384872	1.84297e-11	8.26764e-10	0.355169	0.285834
0	PPARGC1B	6.70863	0.356258	1.9646e-11	8.7858e-10	0.380627	0.31216
0	DLEU7	6.69275	0.274576	2.19013e-11	9.77555e-10	0.55045	0.492121
0	SNX9	6.67169	0.269541	2.52882e-11	1.12226e-09	0.588327	0.532773
0	WDPCP	6.66482	0.293551	2.64994e-11	1.17376e-09	0.505123	0.442036
0	DIRC3	6.65275	0.63446	2.87666e-11	1.26693e-09	0.260789	0.194475
0	SRSF4	6.63653	0.259539	3.21147e-11	1.40904e-09	0.518473	0.445063
0	SMCO4	6.62832	0.412534	3.39536e-11	1.48132e-09	0.325986	0.256669
0	CAP1	6.61845	0.27038	3.62982e-11	1.57473e-09	0.497672	0.429332
0	SIAH1	6.612	0.435043	3.79156e-11	1.64183e-09	0.307358	0.238695
0	PBX3	6.60947	0.273162	3.85695e-11	1.66394e-09	0.535238	0.466389
0	SH3GLB1	6.60477	0.328019	3.98143e-11	1.71445e-09	0.412605	0.345866
0	WARS	6.59885	0.497987	4.14357e-11	1.77768e-09	0.277554	0.209693
0	GCLC	6.59685	0.557842	4.19972e-11	1.79844e-09	0.246197	0.176528
0	DGKH	6.58131	0.788588	4.66317e-11	1.99322e-09	0.183483	0.114712
0	GGA1	6.5748	0.451827	4.87183e-11	2.07496e-09	0.284694	0.215585
0	NAALADL2	6.55681	0.317815	5.49702e-11	2.32821e-09	0.527786	0.47566
0	NBPF14	6.54943	0.285015	5.7759e-11	2.44187e-09	0.448929	0.377787
0	ZC2HC1A	6.54232	0.611625	6.05718e-11	2.55613e-09	0.213598	0.143822
0	WDR91	6.51534	0.359587	7.25258e-11	3.01671e-09	0.359826	0.291321
0	SLC25A25	6.50563	0.550686	7.73671e-11	3.21233e-09	0.232226	0.162743
0	TMOD1	6.48417	0.368167	8.92244e-11	3.69144e-09	0.348649	0.279374
0	MTHFR	6.47205	0.362006	9.66841e-11	3.97879e-09	0.345545	0.276401
0	TBK1	6.43338	0.305178	1.248e-10	5.11768e-09	0.425334	0.358434
0	RAMP1	6.42863	1.16369	1.2876e-10	5.25221e-09	0.127911	0.0598967
0	ANKUB1	6.41045	0.322953	1.45088e-10	5.89755e-09	0.417262	0.352948
0	ITGB1	6.40547	0.299752	1.49907e-10	6.08277e-09	0.439615	0.373274
0	BCAR3	6.4024	0.273929	1.52956e-10	6.19567e-09	0.525613	0.462821
0	CATSPER2	6.38995	0.368435	1.65943e-10	6.67511e-09	0.330022	0.261021
0	HERPUD1	6.34946	0.275351	2.16073e-10	8.61693e-09	0.510711	0.446739
0	ST5	6.34532	0.349093	2.2196e-10	8.83653e-09	0.390872	0.328865
0	MGST3	6.34044	0.403071	2.2911e-10	9.10555e-09	0.30891	0.242182
0	NAB1	6.3399	0.393759	2.29914e-10	9.12187e-09	0.323192	0.256805
0	IQGAP1	6.31341	0.378523	2.72959e-10	1.07562e-08	0.321639	0.25375
0	RCBTB1	6.25527	0.361894	3.96834e-10	1.54798e-08	0.341198	0.274995
0	RP11-946L16.1	6.24903	0.346119	4.13008e-10	1.60568e-08	0.34213	0.273779
0	GNPTAB	6.2468	0.270711	4.18938e-10	1.62601e-08	0.473766	0.408493
0	AFDN	6.2426	0.330403	4.30363e-10	1.66757e-08	0.350823	0.281212
0	NFKBIZ	6.22995	0.464117	4.66582e-10	1.80079e-08	0.279727	0.216099
0	NDUFAF2	6.2259	0.39197	4.78809e-10	1.84298e-08	0.336852	0.274049
0	VKORC1L1	6.21159	0.314092	5.24516e-10	2.01223e-08	0.394598	0.328621
0	CD58	6.17193	0.251277	6.746e-10	2.5668e-08	0.525303	0.463092
0	CDCP1	6.16546	0.594466	7.02768e-10	2.6696e-08	0.212977	0.148309
0	CADM1	6.15651	0.640429	7.43668e-10	2.82035e-08	0.20801	0.143417
0	PLEKHM2	6.15615	0.321717	7.4533e-10	2.82204e-08	0.372866	0.308593
0	ITGB2	6.12332	0.255733	9.16435e-10	3.45299e-08	0.471282	0.403195
0	C3AR1	6.12096	0.37947	9.30113e-10	3.49885e-08	0.310463	0.24556
0	MFSD14B	6.11344	0.332217	9.75089e-10	3.65029e-08	0.344303	0.277158
0	KPNB1	6.11261	0.253294	9.80175e-10	3.66342e-08	0.484011	0.41852
0	ECHDC1	6.0746	0.271111	1.24294e-09	4.58642e-08	0.463521	0.400303
0	VPS39	6.07244	0.301923	1.25981e-09	4.64129e-08	0.400186	0.336919
0	TREML1	6.06952	0.67907	1.2829e-09	4.71887e-08	0.181621	0.117388
0	MPP1	6.06787	0.646443	1.29621e-09	4.75277e-08	0.187519	0.123253
0	C6ORF106	6.06242	0.300501	1.34088e-09	4.90106e-08	0.386215	0.320215
0	ESR1	6.05404	0.442961	1.41256e-09	5.12273e-08	0.269792	0.205638
0	NFKB1	6.02152	0.26136	1.72784e-09	6.22719e-08	0.512574	0.450874
0	MAST2	5.97606	0.300017	2.28601e-09	8.21336e-08	0.404533	0.341568
0	SLC36A1	5.96774	0.465648	2.40567e-09	8.62991e-08	0.241229	0.176879
0	UHRF1BP1	5.96645	0.257666	2.42476e-09	8.68498e-08	0.465694	0.400384
0	XPOT	5.96086	0.472391	2.50918e-09	8.97352e-08	0.24837	0.185366
0	DCLK2	5.9337	1.01435	2.96185e-09	1.05275e-07	0.131636	0.0690597
0	TTL	5.92853	0.39956	3.05667e-09	1.08479e-07	0.287178	0.225045
0	PKDCC	5.91176	1.10732	3.38482e-09	1.19394e-07	0.122012	0.0595183
0	WWC3	5.85794	0.581978	4.68641e-09	1.62588e-07	0.21453	0.154553
0	DNM1L	5.81819	0.262022	5.94875e-09	2.04246e-07	0.427507	0.363192
0	PAQR3	5.80545	0.426928	6.41944e-09	2.19757e-07	0.267619	0.206152
0	ALAS1	5.80143	0.936775	6.57516e-09	2.24756e-07	0.131636	0.0700327
0	WDFY1	5.77959	0.296726	7.48806e-09	2.5372e-07	0.361068	0.2967
0	PDK4	5.73777	0.454574	9.59316e-09	3.2037e-07	0.253027	0.192772
0	TNFRSF11A	5.73384	0.703682	9.8183e-09	3.26322e-07	0.168892	0.108603
0	MICU1	5.72893	0.251937	1.01069e-08	3.34161e-07	0.470351	0.405844
0	PID1	5.72844	0.63631	1.01356e-08	3.34635e-07	0.19435	0.134768
0	INO80	5.70869	0.251323	1.13849e-08	3.73227e-07	0.461347	0.40406
0	METTL9	5.70543	0.253505	1.16047e-08	3.78826e-07	0.46321	0.406844
0	CDS2	5.69451	0.333607	1.23724e-08	4.02753e-07	0.344613	0.286672
0	PARVB	5.67499	0.301834	1.38698e-08	4.48354e-07	0.345855	0.28259
0	LINC01374	5.66909	0.533548	1.43559e-08	4.62779e-07	0.203353	0.142822
0	PTPRO	5.66359	0.31491	1.4824e-08	4.77207e-07	0.356722	0.299349
0	SNX5	5.65127	0.325791	1.59263e-08	5.11272e-07	0.334989	0.276239
0	CCDC149	5.64624	0.39341	1.63991e-08	5.24275e-07	0.274138	0.214585
0	SRSF2	5.64145	0.282786	1.68626e-08	5.38349e-07	0.364483	0.300997
0	CYP20A1	5.62296	0.273515	1.87712e-08	5.95192e-07	0.382179	0.319269
0	SLC31A1	5.54769	0.463715	2.89466e-08	9.09134e-07	0.230674	0.172176
0	ABCE1	5.53895	0.360418	3.04288e-08	9.52927e-07	0.291835	0.2331
0	ORMDL1	5.53875	0.309041	3.04641e-08	9.52927e-07	0.353306	0.296538
0	PLA2G15	5.53181	0.420162	3.16938e-08	9.88727e-07	0.246818	0.187853
0	VEZT	5.52901	0.275698	3.22036e-08	1.00194e-06	0.399876	0.342352
0	CDR2	5.52662	0.322675	3.26461e-08	1.01435e-06	0.312325	0.251723
0	SLC25A46	5.47827	0.357939	4.29493e-08	1.31859e-06	0.30208	0.245506
0	NRP1	5.46563	0.385541	4.61256e-08	1.41423e-06	0.30208	0.247209
0	BID	5.4445	0.377727	5.19499e-08	1.59071e-06	0.269482	0.210693
0	PPM1L	5.44143	0.331619	5.28535e-08	1.61624e-06	0.346166	0.290402
0	LTA4H	5.42613	0.419871	5.75885e-08	1.75872e-06	0.256442	0.200016
0	EHBP1L1	5.41061	0.250297	6.28088e-08	1.91563e-06	0.42254	0.363516
0	THUMPD2	5.38258	0.27426	7.34259e-08	2.21327e-06	0.365104	0.3037
0	SCPEP1	5.36038	0.325599	8.30476e-08	2.49036e-06	0.313567	0.255805
0	STEAP3	5.34566	0.372026	9.00878e-08	2.67726e-06	0.266687	0.209774
0	DIAPH1	5.32324	0.367776	1.01936e-07	3.00628e-06	0.293698	0.238154
0	PARP12	5.28526	0.355011	1.25528e-07	3.66941e-06	0.271344	0.214558
0	NLN	5.27937	0.474776	1.29629e-07	3.78453e-06	0.222912	0.167797
0	COG3	5.27829	0.271306	1.30392e-07	3.802e-06	0.372866	0.315863
0	AP000769.1	5.27343	0.416767	1.33899e-07	3.89785e-06	0.260168	0.206692
0	PDE4DIP	5.27327	0.262158	1.34015e-07	3.89785e-06	0.427507	0.374841
0	PDGFA	5.25112	1.01369	1.51177e-07	4.37509e-06	0.11425	0.0587345
0	MFHAS1	5.24846	0.731514	1.53374e-07	4.43314e-06	0.149022	0.093467
0	RP11-238K6.1	5.23308	0.451547	1.66708e-07	4.76514e-06	0.217324	0.161851
0	CEBPA	5.22648	0.473823	1.7277e-07	4.91454e-06	0.212046	0.156878
0	LONRF1	5.19796	1.03397	2.01489e-07	5.68925e-06	0.113008	0.0580317
0	CD9	5.17786	1.02887	2.2445e-07	6.30687e-06	0.112077	0.0572479
0	UBAP2	5.17508	0.269652	2.27812e-07	6.38589e-06	0.36945	0.313161
0	SCML1	5.17195	0.514613	2.31665e-07	6.47824e-06	0.193418	0.138687
0	PPM1H	5.13694	0.707911	2.79247e-07	7.77137e-06	0.148712	0.0944941
0	MCU	5.12235	0.317164	3.01752e-07	8.3377e-06	0.313257	0.259778
0	CD180	5.11656	0.651877	3.11166e-07	8.58758e-06	0.153989	0.0995486
0	MKL2	5.09544	0.276039	3.4794e-07	9.53447e-06	0.357653	0.301997
0	AHDC1	5.09111	0.389407	3.55964e-07	9.74284e-06	0.251164	0.197097
0	FHOD1	5.09006	0.492859	3.57942e-07	9.77393e-06	0.196833	0.142741
0	SLC1A4	5.07057	0.362263	3.96619e-07	1.07595e-05	0.258305	0.2038
0	GFM1	5.06875	0.36809	4.00443e-07	1.08451e-05	0.26203	0.209287
0	ANKRD6	5.06314	0.437166	4.12403e-07	1.11172e-05	0.222912	0.168473
0	GTF2IRD1	5.05354	0.436907	4.33688e-07	1.16638e-05	0.229121	0.176312
0	CD226	5.04954	0.328742	4.4287e-07	1.18832e-05	0.346476	0.299997
0	HDAC7	5.04529	0.346102	4.52836e-07	1.21087e-05	0.27507	0.221126
0	SLC41A2	5.04485	1.16709	4.53866e-07	1.21222e-05	0.101521	0.0482472
0	PXDC1	5.03583	0.464603	4.75771e-07	1.2642e-05	0.199317	0.144931
0	LITAF	5.03167	0.303069	4.86213e-07	1.28824e-05	0.335921	0.285347
0	HACD2	5.00419	0.330182	5.60989e-07	1.46463e-05	0.296802	0.245155
0	CLTA	4.99928	0.337887	5.7546e-07	1.50072e-05	0.28842	0.236208
0	SLC17A5	4.98804	0.339904	6.09958e-07	1.58534e-05	0.277243	0.223856
0	RPS4Y1	4.98125	0.420554	6.31743e-07	1.64013e-05	0.215151	0.161391
0	PFKP	4.98018	0.265045	6.3524e-07	1.64737e-05	0.32195	0.264859
0	REEP3	4.96428	0.281069	6.89549e-07	1.78223e-05	0.350202	0.298808
0	NCF2	4.94611	0.462216	7.5711e-07	1.94386e-05	0.215461	0.164203
0	MINK1	4.94452	0.260225	7.63326e-07	1.95766e-05	0.374418	0.323405
0	DDX21	4.94405	0.294061	7.65172e-07	1.96023e-05	0.320087	0.267292
0	C2CD3	4.93207	0.327763	8.13622e-07	2.07975e-05	0.275691	0.221342
0	SLC44A2	4.92988	0.453209	8.22816e-07	2.10094e-05	0.204284	0.151418
0	SYNJ1	4.92124	0.264758	8.59978e-07	2.19101e-05	0.366035	0.31508
0	PTDSS1	4.91996	0.443447	8.65636e-07	2.20301e-05	0.202111	0.14912
0	RAB22A	4.91521	0.291215	8.86884e-07	2.25146e-05	0.311394	0.257724
0	UCP2	4.91505	0.667491	8.87587e-07	2.25146e-05	0.152748	0.101278
0	GAS2L3	4.87991	0.770481	1.06135e-06	2.66889e-05	0.124806	0.0726005
0	PEPD	4.86413	0.357719	1.14963e-06	2.85379e-05	0.257063	0.2058
0	HMGXB3	4.84752	0.358688	1.25014e-06	3.09667e-05	0.256442	0.205422
0	DIP2C	4.84533	0.271713	1.26404e-06	3.12775e-05	0.336231	0.283726
0	HGSNAT	4.83113	0.258523	1.35758e-06	3.35207e-05	0.372555	0.32108
0	IFI44L	4.80742	0.291876	1.52892e-06	3.75914e-05	0.32909	0.279455
0	C12ORF76	4.8019	0.338528	1.57166e-06	3.86014e-05	0.267929	0.217531
0	CEBPG	4.79525	0.426711	1.62469e-06	3.97775e-05	0.205526	0.153823
0	FAM3C	4.77782	0.368225	1.77208e-06	4.32037e-05	0.256753	0.207665
0	ACOT11	4.7742	0.444783	1.80422e-06	4.39411e-05	0.191866	0.140228
0	STX3	4.76972	0.341115	1.84485e-06	4.48367e-05	0.264825	0.215071
0	FARSB	4.72822	0.314657	2.26498e-06	5.39182e-05	0.278485	0.22737
0	DFNA5	4.72226	0.322823	2.33235e-06	5.54083e-05	0.287799	0.238209
0	AKIRIN2	4.72144	0.340292	2.34176e-06	5.55748e-05	0.265446	0.215585
0	PAPSS1	4.7183	0.374191	2.37821e-06	5.63824e-05	0.236883	0.186772
0	SLC18B1	4.68865	0.277817	2.75009e-06	6.46703e-05	0.338715	0.291753
0	TMEM161B	4.65622	0.284495	3.22068e-06	7.52031e-05	0.305185	0.255561
0	ARHGEF40	4.65519	0.265032	3.23684e-06	7.55047e-05	0.331885	0.282672
0	CXCL16	4.65328	0.363394	3.26703e-06	7.61324e-05	0.223223	0.172041
0	MIATNB	4.61796	0.404282	3.87536e-06	8.96782e-05	0.222602	0.174338
0	LINC00854	4.61476	0.330245	3.93548e-06	9.09786e-05	0.252406	0.202206
0	ATP6V1A	4.59699	0.259644	4.28645e-06	9.85036e-05	0.319776	0.268373
0	DENND1B	4.59164	0.300288	4.39767e-06	0.00010086	0.282831	0.232965
0	FERMT3	4.54375	0.396972	5.52622e-06	0.000125013	0.215771	0.168014
0	ERAP1	4.5174	0.270398	6.26042e-06	0.000140799	0.320708	0.273779
0	PRPSAP1	4.5115	0.273019	6.43711e-06	0.000144214	0.312636	0.2644
0	SQSTM1	4.51076	0.257557	6.45951e-06	0.000144576	0.319466	0.271157
0	NAV1	4.49977	0.310266	6.80276e-06	0.000150804	0.261099	0.213044
0	ACTG1	4.49709	0.359205	6.88887e-06	0.000152422	0.22819	0.180069
0	PPIP5K1	4.49453	0.302848	6.97253e-06	0.00015398	0.262651	0.213558
0	ATP6AP1	4.49215	0.509151	7.05064e-06	0.000155409	0.169202	0.121577
0	TBC1D2	4.49047	0.87316	7.10671e-06	0.000156496	0.108972	0.0614644
0	USF3	4.485	0.316769	7.29154e-06	0.000159959	0.258615	0.209882
0	IDS	4.47939	0.358492	7.48568e-06	0.000163754	0.233778	0.186366
0	RABGGTB	4.46784	0.35166	7.90145e-06	0.000171716	0.232536	0.184393
0	SEPT11	4.44968	0.388862	8.59991e-06	0.000185333	0.224775	0.178312
0	MFN1	4.4478	0.287513	8.67543e-06	0.000186621	0.285315	0.238506
0	ZNF330	4.44318	0.297058	8.86388e-06	0.000190149	0.280969	0.234208
0	EIF2A	4.42158	0.278405	9.79811e-06	0.000208637	0.278174	0.229208
0	ZNF75D	4.41069	0.284794	1.0304e-05	0.000218808	0.298975	0.252642
0	EDRF1	4.40313	0.303022	1.06699e-05	0.000225956	0.258615	0.210422
0	TMCO3	4.38599	0.371037	1.15459e-05	0.000243177	0.211115	0.163986
0	KCNJ2	4.38263	0.647285	1.17256e-05	0.000246514	0.139087	0.0930616
0	PLPP1	4.36987	0.255787	1.24319e-05	0.000260418	0.385595	0.342487
0	ESD	4.36601	0.391212	1.26535e-05	0.000264346	0.203663	0.157067
0	GRID2	4.36321	0.365648	1.28169e-05	0.000267039	0.347408	0.30843
0	ABCB4	4.35637	0.731142	1.32234e-05	0.000274277	0.125737	0.0800065
0	NR1D2	4.34594	0.323837	1.38682e-05	0.000286371	0.252406	0.206449
0	STEAP1B	4.34404	0.261672	1.39885e-05	0.000288598	0.328469	0.282374
0	HLA-DQB1	4.33559	0.2663	1.45371e-05	0.000298589	0.284073	0.236262
0	SERINC5	4.32973	0.267028	1.49293e-05	0.000305833	0.306737	0.260427
0	CCDC12	4.31402	0.272585	1.60314e-05	0.000326968	0.271344	0.22318
0	EPM2A	4.304	0.394446	1.6774e-05	0.000340617	0.208631	0.163202
0	TRIM37	4.2941	0.30851	1.75404e-05	0.000354936	0.253648	0.207503
0	HLCS	4.2866	0.255326	1.81428e-05	0.000366168	0.325675	0.279861
0	PTPN11	4.27612	0.253406	1.90179e-05	0.0003825	0.294319	0.246804
0	SUPT6H	4.2614	0.261986	2.03147e-05	0.000407524	0.285315	0.238154
0	ATP6V0D1	4.25143	0.345296	2.12409e-05	0.000424635	0.216703	0.170284
0	BTBD3	4.22473	0.425443	2.39224e-05	0.000476599	0.187519	0.142471
0	MTMR12	4.20749	0.364924	2.58221e-05	0.000510068	0.206768	0.1615
0	FANCC	4.19638	0.320588	2.71209e-05	0.000531653	0.244955	0.200314
0	NMD3	4.1894	0.284675	2.79693e-05	0.000546437	0.244955	0.198097
0	C16ORF70	4.1764	0.263068	2.96159e-05	0.000575699	0.274449	0.228073
0	TOLLIP	4.16983	0.551708	3.04832e-05	0.000590088	0.143123	0.0987377
0	CERS5	4.15575	0.325838	3.2422e-05	0.000623109	0.230674	0.186231
0	M6PR	4.15085	0.260095	3.3125e-05	0.000634872	0.29556	0.251345
0	FSD1L	4.15046	0.535334	3.31813e-05	0.000635428	0.147159	0.103225
0	GTF2H1	4.14307	0.282392	3.42691e-05	0.000654101	0.266687	0.222342
0	FGR	4.14073	0.449332	3.46198e-05	0.000660252	0.185657	0.14266
0	MCCC2	4.13129	0.286319	3.60735e-05	0.000685722	0.251475	0.206179
0	IL15	4.1308	0.27388	3.61507e-05	0.000686627	0.246507	0.199827
0	ESF1	4.1197	0.254247	3.79368e-05	0.000714702	0.309531	0.266184
0	EPT1	4.11902	0.299094	3.80486e-05	0.000716227	0.255821	0.21226
0	PLEKHB2	4.11738	0.289043	3.83196e-05	0.000720744	0.26172	0.217612
0	PLBD2	4.11013	0.513943	3.95433e-05	0.000740759	0.151195	0.107468
0	NAGLU	4.10299	0.532692	4.07843e-05	0.000759544	0.140329	0.0963051
0	INPP5A	4.08925	0.477874	4.32763e-05	0.000800991	0.160509	0.117009
0	CAAP1	4.06704	0.293394	4.76143e-05	0.000877085	0.250543	0.206828
0	ZNHIT6	4.02085	0.263296	5.79887e-05	0.00104904	0.289662	0.246858
0	VEGFB	4.01404	0.381986	5.96889e-05	0.00107644	0.183794	0.140498
0	MOSPD2	4.01047	0.399319	6.05976e-05	0.00109198	0.185346	0.142876
0	RP11-472N13.3	4.00876	0.272229	6.10381e-05	0.00109821	0.259857	0.216342
0	LAMP1	4.0046	0.263852	6.21228e-05	0.00111494	0.268861	0.225694
0	RIOK1	4.00187	0.377259	6.28438e-05	0.00112373	0.195281	0.152499
0	KDM5D	3.99904	0.268356	6.35995e-05	0.00113637	0.248681	0.204044
0	MRRF	3.99745	0.260258	6.40299e-05	0.00114318	0.274759	0.230586
0	AC009784.3	3.9937	0.367744	6.50496e-05	0.00115878	0.184725	0.14093
0	STK40	3.98715	0.266005	6.6871e-05	0.00118751	0.26141	0.217639
0	CTBP1	3.97954	0.254434	6.90494e-05	0.00122152	0.270413	0.22591
0	RCAN1	3.97594	0.430703	7.01026e-05	0.00123732	0.18814	0.146931
0	UNC13B	3.97547	0.412991	7.02407e-05	0.00123882	0.180689	0.138471
0	GLRX3	3.97377	0.252949	7.07433e-05	0.00124674	0.292145	0.24929
0	XPO5	3.96593	0.290984	7.31111e-05	0.00128554	0.242161	0.199232
0	CDC42EP3	3.96513	0.455121	7.33548e-05	0.00128884	0.158957	0.116361
0	ELMO2	3.9644	0.381941	7.35809e-05	0.00129184	0.193418	0.151364
0	TPD52L2	3.95685	0.411114	7.59455e-05	0.00132434	0.18131	0.139525
0	FAM212B	3.94198	0.319126	8.08132e-05	0.00139983	0.229742	0.187637
0	SAE1	3.93865	0.318297	8.19426e-05	0.00141509	0.210804	0.16777
0	CYP27A1	3.92662	0.279796	8.61479e-05	0.0014833	0.259236	0.217612
0	NAT10	3.9157	0.393435	9.01424e-05	0.0015452	0.177585	0.135416
0	APIP	3.90621	0.279744	9.37546e-05	0.00160121	0.232536	0.189286
0	SDAD1	3.90407	0.26384	9.45871e-05	0.00161305	0.248991	0.205341
0	ZFYVE26	3.9034	0.305525	9.48507e-05	0.00161636	0.232847	0.191286
0	ANAPC7	3.899	0.276788	9.65903e-05	0.00164239	0.239988	0.19707
0	ADRB2	3.89162	0.414603	9.95759e-05	0.00168821	0.173549	0.132119
0	FAM219A	3.88568	0.400084	0.000102042	0.00172498	0.171996	0.130254
0	DENND2D	3.88401	0.747552	0.000102749	0.00173567	0.106178	0.0650864
0	CENPP	3.87654	0.253088	0.000105952	0.00178716	0.30177	0.260643
0	ATP6V0B	3.87022	0.259895	0.000108736	0.00183015	0.257373	0.214774
0	RENBP	3.86627	0.390557	0.000110511	0.00185868	0.180689	0.139579
0	HEXB	3.85446	0.253572	0.000115984	0.00194087	0.28159	0.240479
0	GOPC	3.84933	0.25174	0.00011844	0.00197769	0.271344	0.229884
0	SLC3A2	3.84669	0.644239	0.000119725	0.00199484	0.115803	0.074952
0	UTP20	3.83684	0.265911	0.000124627	0.00206761	0.256753	0.215585
0	ANXA7	3.81347	0.331239	0.00013703	0.00225564	0.218876	0.17842
0	WDR4	3.80819	0.372275	0.000139989	0.00230273	0.175411	0.13393
0	CWF19L1	3.8012	0.367014	0.000143997	0.00235808	0.195902	0.156121
0	WDR1	3.79492	0.266545	0.000147693	0.00240053	0.244024	0.202449
0	NME7	3.78045	0.34252	0.000156542	0.00252315	0.200248	0.159553
0	SMIM3	3.77426	0.558839	0.000160481	0.00257948	0.119218	0.0784658
0	CPNE8	3.76402	0.483617	0.000167206	0.002682	0.139708	0.0993324
0	TMA16	3.75802	0.313009	0.000171264	0.0027368	0.209562	0.168852
0	TMEM154	3.75054	0.44323	0.000176452	0.00281281	0.168892	0.129632
0	CEP68	3.74814	0.335478	0.000178152	0.00283601	0.202732	0.16277
0	CXORF23	3.73498	0.267202	0.000187733	0.00297222	0.239367	0.198016
0	PPP1R12C	3.72513	0.315985	0.000195218	0.00307541	0.206147	0.165851
0	SMG5	3.72444	0.322272	0.000195748	0.00307957	0.211425	0.171771
0	RHOBTB2	3.72409	0.56779	0.000196021	0.00308033	0.125427	0.0858989
0	CLIC2	3.71779	0.325252	0.000200977	0.00315428	0.199317	0.159121
0	FAM216A	3.71776	0.389419	0.000200998	0.00315428	0.16765	0.127497
0	OSTM1	3.71499	0.291516	0.000203215	0.00318475	0.23471	0.195124
0	CDKL5	3.70976	0.317777	0.000207455	0.00324682	0.222291	0.182853
0	RNPS1	3.6909	0.266647	0.000223466	0.003467	0.243092	0.203638
0	NAB2	3.68449	0.724966	0.000229164	0.00355066	0.100279	0.0611401
0	SDHB	3.68073	0.262743	0.00023257	0.00359863	0.230053	0.189286
0	LARP1B	3.65982	0.271772	0.000252388	0.00388199	0.26203	0.223883
0	MTFMT	3.65573	0.293306	0.000256456	0.00393413	0.209873	0.169689
0	CLEC2B	3.65358	0.296863	0.000258608	0.00396452	0.19435	0.153796
0	GOLGA5	3.64498	0.321131	0.000267409	0.00408057	0.20832	0.169635
0	PPM1M	3.64229	0.559008	0.000270223	0.00411386	0.120459	0.0815742
0	TUBGCP5	3.63608	0.29513	0.000276823	0.00420489	0.223533	0.184501
0	CYSTM1	3.63439	0.436692	0.000278635	0.00422687	0.158646	0.12028
0	SLC25A24	3.63371	0.303324	0.000279379	0.0042354	0.211115	0.171554
0	SWT1	3.63053	0.305652	0.000282843	0.00427395	0.207699	0.168338
0	DBI	3.62772	0.512001	0.000285933	0.00430943	0.125427	0.0864935
0	PCMT1	3.62697	0.261287	0.000286766	0.00431636	0.240609	0.201178
0	DGKG	3.62418	0.550433	0.000289884	0.00435764	0.135362	0.0975755
0	CAMKK1	3.617	0.331023	0.000298034	0.00445707	0.193729	0.154769
0	PDHX	3.61627	0.255548	0.000298882	0.00446687	0.257063	0.21772
0	TTTY15	3.58289	0.265103	0.000339815	0.00502364	0.233157	0.193989
0	KCNMB4	3.57429	0.439439	0.000351178	0.00517186	0.152437	0.11428
0	ZFY	3.57372	0.295142	0.000351951	0.00517704	0.197144	0.157418
0	ZNF812P	3.5737	0.419633	0.000351976	0.00517704	0.152437	0.11409
0	SP1	3.56477	0.26684	0.000364182	0.00533291	0.242471	0.2048
0	ABHD6	3.56402	0.420054	0.000365224	0.0053448	0.149643	0.111387
0	CAPG	3.54767	0.337444	0.000388654	0.00564496	0.195902	0.15858
0	CD68	3.54453	0.408262	0.000393307	0.00570265	0.162682	0.12528
0	GTPBP4	3.54443	0.309007	0.00039346	0.00570265	0.198386	0.159986
0	UEVLD	3.52983	0.251417	0.000415829	0.0059761	0.25489	0.216964
0	EXOC7	3.52417	0.317938	0.000424805	0.00609754	0.195902	0.158256
0	AVEN	3.50901	0.363336	0.00044977	0.00642806	0.190003	0.153148
0	HS1BP3	3.49938	0.383583	0.000466347	0.00662014	0.15461	0.116685
0	SORBS3	3.49186	0.464051	0.000479676	0.00678858	0.133809	0.0963321
0	CD63	3.48531	0.283239	0.000491559	0.00691041	0.212356	0.174852
0	DCTN2	3.48418	0.357823	0.00049364	0.00693127	0.169823	0.132416
0	KLHDC4	3.48377	0.274333	0.000494413	0.00693373	0.207389	0.168879
0	ZNF746	3.48093	0.32489	0.000499682	0.0070034	0.180379	0.142633
0	IFT88	3.47695	0.310003	0.000507149	0.00709092	0.194039	0.156229
0	PTH2R	3.45555	0.579754	0.000549166	0.00759151	0.110835	0.074033
0	RHOBTB1	3.45267	0.353483	0.000555061	0.00765931	0.183173	0.146823
0	NARS	3.43077	0.279536	0.000601871	0.00821247	0.213598	0.176474
0	CHUK	3.41068	0.276712	0.000648002	0.00876975	0.203663	0.166311
0	HCFC2	3.39197	0.323619	0.000693925	0.0093048	0.182862	0.146336
0	SUPT16H	3.39149	0.254554	0.000695148	0.00931547	0.22788	0.191205
0	PTPN7	3.39059	0.538451	0.000697418	0.00934049	0.117976	0.0819256
0	AP1AR	3.38595	0.372366	0.000709311	0.00948336	0.171375	0.135362
0	SMAD7	3.38214	0.261774	0.000719236	0.00959395	0.228811	0.192448
0	PEBP4	3.37961	0.597328	0.000725897	0.00967169	0.105868	0.0698165
0	SLC47A1	3.37853	0.592846	0.000728742	0.00969382	0.109593	0.0737357
0	ALKBH1	3.3785	0.274522	0.000728811	0.00969382	0.189382	0.151607
0	ZNF761	3.37027	0.257885	0.00075094	0.00995392	0.216392	0.179555
0	CARS	3.35875	0.279641	0.00078296	0.0103547	0.208941	0.172419
0	FKTN	3.35348	0.281311	0.000798032	0.0105061	0.210183	0.174068
0	MCTP1	3.35087	0.315791	0.000805585	0.0105816	0.163303	0.126551
0	RNF122	3.34672	0.551613	0.000817724	0.0107168	0.115492	0.0800065
0	HLA-DQA1	3.34081	0.328776	0.000835351	0.0109354	0.183794	0.148174
0	RTCA	3.33635	0.258384	0.000848867	0.0110998	0.222912	0.186637
0	MAFG	3.33324	0.290056	0.000858399	0.0112055	0.193418	0.157256
0	SCO1	3.32865	0.322719	0.000872686	0.011359	0.180379	0.144552
0	ZNF594	3.32502	0.300127	0.00088413	0.0114689	0.200248	0.164851
0	GM2A	3.31282	0.395199	0.000923596	0.0119291	0.148712	0.113117
0	TMBIM1	3.3077	0.290991	0.000940656	0.0121214	0.193729	0.157743
0	EIF2AK1	3.29911	0.271667	0.000969924	0.0124391	0.205216	0.169311
0	CXCL12	3.2916	0.346712	0.000996199	0.0127323	0.17448	0.139444
0	TMEM120B	3.28208	0.360906	0.00103044	0.0131105	0.1543	0.11882
0	GABARAPL1	3.27198	0.445053	0.00106798	0.0135526	0.129463	0.094386
0	IMMP1L	3.26214	0.281828	0.00110573	0.013992	0.19435	0.158932
0	PIGX	3.26202	0.300225	0.00110622	0.013992	0.200559	0.166311
0	SAR1A	3.2316	0.268031	0.00123098	0.0153855	0.202422	0.167014
0	TTYH3	3.22878	0.287047	0.00124319	0.0155132	0.210804	0.177095
0	ADNP2	3.22325	0.309051	0.00126744	0.0157903	0.176964	0.141984
0	UBE2Q2	3.21781	0.357921	0.00129172	0.0160497	0.168892	0.134876
0	LSG1	3.21647	0.251059	0.00129778	0.0161163	0.211425	0.176474
0	LIMK1	3.21533	0.278607	0.00130296	0.0161634	0.199007	0.164121
0	SLC17A9	3.20983	0.302319	0.00132813	0.0164505	0.195591	0.161446
0	TSTD2	3.20544	0.276296	0.00134858	0.0166669	0.212667	0.178555
0	PLD2	3.19287	0.347007	0.00140865	0.01728	0.158025	0.123686
0	ITGA6	3.18722	0.31928	0.00143648	0.0175569	0.207389	0.175528
0	TBC1D22B	3.18616	0.254678	0.00144176	0.017603	0.215151	0.18069
0	IFT122	3.16967	0.290686	0.00152611	0.0184773	0.184725	0.150445
0	ST7	3.16949	0.257792	0.00152708	0.0184794	0.215461	0.18088
0	FAM196B	3.16291	0.262991	0.001562	0.0188333	0.206147	0.17196
0	TRIM66	3.16023	0.330384	0.00157644	0.0189483	0.16765	0.133849
0	DNAJB11	3.15932	0.426264	0.00158136	0.0189975	0.132878	0.0991972
0	CTD-2054N24.2	3.14068	0.28278	0.00168555	0.020083	0.205216	0.171744
0	USP31	3.13645	0.32327	0.00171008	0.0203438	0.172307	0.138903
0	TAF1A	3.13621	0.426894	0.00171146	0.0203499	0.133188	0.0997648
0	KIF21B	3.12549	0.291583	0.0017751	0.0210046	0.190003	0.156661
0	DCUN1D2	3.12205	0.295907	0.00179599	0.0211922	0.18131	0.14758
0	SLC39A1	3.11956	0.573892	0.00181119	0.0213498	0.104936	0.0719518
0	CARNMT1	3.10513	0.25023	0.00190195	0.0223064	0.213288	0.179528
0	HDAC5	3.08905	0.262101	0.002008	0.0234436	0.20832	0.175366
0	SLC35G2	3.06651	0.307236	0.0021657	0.0250207	0.180379	0.148066
0	METTL3	3.06445	0.326635	0.00218073	0.0251315	0.163924	0.131065
0	SLC15A3	3.06322	0.256906	0.00218972	0.0251975	0.198696	0.165581
0	POLR1A	3.05935	0.251645	0.00221815	0.0254867	0.20801	0.174717
0	LRP12	3.05502	0.339345	0.00225046	0.0257942	0.160199	0.127551
0	TNFSF8	3.04614	0.319663	0.00231802	0.0264563	0.169202	0.136471
0	FAM219B	3.04515	0.277576	0.00232563	0.0265112	0.185967	0.152769
0	PRCC	3.04501	0.268144	0.00232672	0.0265112	0.187209	0.153958
0	SLC35B4	3.04217	0.264944	0.00234877	0.0267099	0.19435	0.161716
0	ZYX	3.03518	0.359753	0.00240389	0.0272833	0.143744	0.111036
0	SMIM4	3.03067	0.310127	0.00244011	0.0276461	0.182862	0.151066
0	SEH1L	3.03061	0.279786	0.00244062	0.0276461	0.167339	0.133876
0	NFKBID	3.02548	0.395268	0.00248237	0.0279824	0.14778	0.115982
0	TOMM70	3.01292	0.266652	0.00258748	0.0289983	0.185967	0.153039
0	OAS1	3.00058	0.270309	0.00269464	0.030083	0.190934	0.158797
0	NDUFB9	2.98685	0.479583	0.00281868	0.0312722	0.110214	0.0782766
0	MPHOSPH10	2.98443	0.340179	0.00284103	0.0314751	0.150264	0.118226
0	AC008074.1	2.98259	0.420235	0.00285821	0.0316028	0.122943	0.0909533
0	LACTB2	2.96899	0.261361	0.00298778	0.0329124	0.175101	0.142228
0	SLC9A7	2.96464	0.37048	0.0030304	0.0333502	0.154921	0.124091
0	FAM21A	2.95308	0.325017	0.00314625	0.0344652	0.158957	0.127254
0	ERN1	2.95304	0.314445	0.00314656	0.0344652	0.158025	0.126443
0	OTUD1	2.94477	0.596894	0.00323196	0.0353172	0.106178	0.0754926
0	AARS	2.93519	0.268818	0.00333345	0.0363066	0.183483	0.151472
0	WDR12	2.92709	0.32175	0.00342145	0.0371604	0.163924	0.132984
0	STARD3NL	2.91573	0.252975	0.00354854	0.0383947	0.194971	0.163229
0	LINC00484	2.91561	0.532217	0.00354998	0.0383947	0.103384	0.0726005
0	PCYT1A	2.91377	0.305604	0.00357089	0.0385311	0.158646	0.127037
0	CTC-542B22.2	2.91335	0.43481	0.00357568	0.0385649	0.119218	0.0881423
0	RNFT1	2.91234	0.331167	0.00358736	0.0386729	0.153058	0.121848
0	CRY1	2.91153	0.366839	0.00359666	0.0387551	0.145607	0.114685
0	TXNDC15	2.90981	0.279748	0.00361654	0.0389332	0.181931	0.151012
0	GARS	2.90337	0.301383	0.00369173	0.0396323	0.172928	0.142174
0	MTG2	2.90289	0.289502	0.00369741	0.039675	0.176653	0.145606
0	GART	2.90246	0.253487	0.00370241	0.0397103	0.19466	0.163094
0	XYLB	2.89975	0.252082	0.00373461	0.0400186	0.195591	0.16423
0	AP001055.6	2.89421	0.386333	0.00380112	0.0406188	0.137845	0.107117
0	MLX	2.88738	0.316299	0.0038846	0.0413775	0.157715	0.126848
0	RAD17	2.88398	0.307011	0.00392687	0.0416785	0.152127	0.120821
0	STYX	2.86603	0.276372	0.00415651	0.0438911	0.172307	0.14112
0	TCTN3	2.86318	0.520145	0.00419417	0.0442284	0.105247	0.074952
0	SNX8	2.85875	0.327692	0.00425314	0.0446676	0.151506	0.120875
0	FAM21C	2.8564	0.26608	0.0042847	0.0449381	0.181931	0.15112
0	RP11-554D14.6	2.85554	0.283496	0.00429634	0.0450194	0.190624	0.160689
0	ZNF25	2.8482	0.321021	0.00439674	0.0459885	0.153989	0.12328
0	SLC25A6	2.84367	0.258141	0.00445973	0.0466053	0.164235	0.132308
0	SUMF2	2.84343	0.29372	0.00446306	0.0466191	0.165787	0.1352
0	TRIM73	2.83615	0.283983	0.00456614	0.0475034	0.164235	0.133362
0	MCUB	2.82556	0.265798	0.00471978	0.0489045	0.20149	0.171636
0	PAIP1	2.82489	0.2567	0.00472972	0.0489857	0.192487	0.162365
0	CALU	2.81949	0.262576	0.00481007	0.0496848	0.19435	0.164473
0	GLTSCR2	2.81781	0.326992	0.0048353	0.0498788	0.146228	0.115955
0	CMC2	2.81696	0.281654	0.00484805	0.0499881	0.181621	0.151661
0	PLP1	-2.81836	-0.360787	0.004827	0.0498153	0.155852	0.183042
0	LEPROTL1	-2.84234	-0.297298	0.00447833	0.0467576	0.18783	0.214125
0	C3ORF58	-2.8797	-0.257644	0.00398058	0.0421484	0.206458	0.234181
0	RP11-395G23.3	-2.88009	-0.330625	0.00397556	0.0421144	0.160199	0.187934
0	PPP1R3B	-2.88571	-0.449946	0.00390534	0.0415225	0.10059	0.130416
0	RPL29	-2.90901	-0.405922	0.00362573	0.039014	0.159578	0.18688
0	RBMS2	-2.92399	-0.268917	0.00345571	0.0374975	0.20801	0.235289
0	RPL11	-2.97189	-0.303587	0.00295975	0.0326501	0.338715	0.352866
0	RPS24	-2.97362	-0.28483	0.00294308	0.0324971	0.417883	0.421494
0	NAMPT	-3.00212	-0.442403	0.00268108	0.0299605	0.184104	0.210909
0	SERPINB9P1	-3.00751	-0.309866	0.00263397	0.0294908	0.161751	0.192529
0	RPS13	-3.01871	-0.52526	0.00253856	0.0285327	0.131947	0.160121
0	MXD1	-3.02136	-0.455371	0.00251646	0.0283254	0.12108	0.151769
0	CCDC26	-3.04608	-0.287771	0.00231849	0.0264563	0.207389	0.237127
0	FAM162A	-3.06636	-0.433919	0.00216681	0.0250207	0.133809	0.164257
0	HMOX1	-3.15737	-0.414634	0.00159199	0.0191154	0.185967	0.214639
0	RPS11	-3.18767	-0.37282	0.00143422	0.0175386	0.226638	0.252237
0	CASP1	-3.22088	-0.273824	0.00127796	0.0158872	0.209252	0.24129
0	RP11-13N12.1	-3.2366	-0.417175	0.00120964	0.0151597	0.118597	0.153229
0	RPL37	-3.25556	-0.363142	0.00113168	0.0143063	0.319156	0.334649
0	MB21D1	-3.28656	-0.294628	0.0010142	0.0129409	0.218566	0.248777
0	PLEKHA7	-3.29281	-0.512739	0.000991898	0.0126843	0.158646	0.188475
0	CSNK1G2	-3.29531	-0.296305	0.000983128	0.012586	0.192797	0.225397
0	PMEPA1	-3.3249	-0.278394	0.000884504	0.0114689	0.25489	0.283455
0	TMTC2	-3.37289	-0.414306	0.000743843	0.00987677	0.133809	0.168338
0	MLKL	-3.37361	-0.408339	0.000741907	0.00985936	0.131326	0.16623
0	KIAA0513	-3.40425	-0.288052	0.000663458	0.00895282	0.20801	0.240911
0	FSCN1	-3.40608	-0.325488	0.000659023	0.00890333	0.211735	0.242722
0	FAM159A	-3.42455	-0.395219	0.000615813	0.00836828	0.135051	0.170635
0	KLF12	-3.44448	-0.311784	0.00057215	0.00785776	0.200869	0.23483
0	FCGR2B	-3.45443	-0.516949	0.00055145	0.00761854	0.110214	0.145525
0	OLFML2B	-3.48773	-0.40665	0.000487137	0.00686071	0.138156	0.173798
0	TNIK	-3.50719	-0.477107	0.000452865	0.00646036	0.117976	0.15404
0	HIVEP2	-3.53103	-0.446883	0.000413948	0.00596013	0.146849	0.182123
0	TNIP1	-3.5387	-0.349422	0.000402097	0.0058039	0.167029	0.202719
0	C2CD2	-3.54233	-0.288492	0.000396611	0.00573899	0.20149	0.237371
0	KIF3C	-3.55442	-0.481326	0.00037882	0.00551941	0.121391	0.157391
0	NECTIN3	-3.55637	-0.334888	0.000376014	0.00548886	0.196523	0.231289
0	PDE9A	-3.56978	-0.263863	0.000357287	0.0052485	0.271655	0.302511
0	CASP4	-3.57614	-0.258846	0.000348703	0.0051452	0.24185	0.27732
0	MOB3B	-3.63143	-0.286934	0.000281852	0.00426259	0.222602	0.258453
0	AMOT	-3.63287	-0.365592	0.000280284	0.00424357	0.16082	0.197881
0	C17ORF67	-3.64261	-0.297774	0.000269892	0.00411306	0.20118	0.238073
0	C4ORF19	-3.66966	-0.331123	0.000242869	0.00374551	0.196523	0.232613
0	RPL23	-3.6761	-0.461828	0.000236828	0.0036572	0.193418	0.22637
0	SMAD6	-3.73768	-0.36551	0.000185728	0.00294651	0.185657	0.22218
0	HSPA6	-3.73826	-0.502492	0.0001853	0.00294173	0.132878	0.170338
0	RPS23	-3.78012	-0.501851	0.000156754	0.00252377	0.206458	0.237587
0	GIMAP4	-3.79177	-0.330478	0.00014958	0.0024278	0.184415	0.223478
0	RPL38	-3.82841	-0.527369	0.000128974	0.00213515	0.173859	0.208395
0	TMEM2	-3.85591	-0.576896	0.000115298	0.00193079	0.131015	0.168987
0	C9ORF84	-3.86116	-0.284239	0.000112851	0.00189666	0.257994	0.293727
0	TNFSF13B	-3.89943	-0.273086	9.642e-05	0.0016407	0.28873	0.322377
0	RP11-514P8.6	-3.90632	-0.322876	9.37135e-05	0.00160121	0.224775	0.261156
0	TMSB10	-3.92095	-0.437908	8.82001e-05	0.00151414	0.249301	0.278644
0	SUCLG2-AS1	-3.94311	-0.584495	8.04301e-05	0.0013952	0.110214	0.150472
0	HSPB1	-3.94843	-0.453971	7.86651e-05	0.00136561	0.199627	0.235073
0	LLFOS-48D6.2	-3.94893	-0.380038	7.85013e-05	0.00136378	0.176343	0.215855
0	TNFSF10	-3.95916	-0.577195	7.52154e-05	0.00131358	0.104315	0.145039
0	MXI1	-3.96842	-0.635299	7.23497e-05	0.00127311	0.101832	0.142147
0	AIF1	-4.00446	-0.491168	6.21601e-05	0.00111494	0.172617	0.210017
0	CCND2	-4.02039	-0.304818	5.8102e-05	0.00105027	0.217324	0.257913
0	PPM1K	-4.03232	-0.252805	5.52294e-05	0.00100618	0.293387	0.330297
0	AGAP1	-4.04862	-0.305729	5.15211e-05	0.000943063	0.252717	0.290807
0	SLC37A1	-4.0928	-0.310111	4.26197e-05	0.000790098	0.246818	0.285077
0	RPS6KA5	-4.12689	-0.263681	3.67696e-05	0.000695924	0.316361	0.35211
0	RP11-563J2.2	-4.12839	-0.411397	3.65311e-05	0.000692719	0.172928	0.213909
0	RPL32	-4.13856	-0.528122	3.49498e-05	0.000665998	0.219808	0.253669
0	FAM110B	-4.15859	-0.391634	3.20219e-05	0.000616787	0.247128	0.283807
0	MMRN1	-4.16531	-0.564892	3.10933e-05	0.000601396	0.108972	0.152039
0	RPL37A	-4.1795	-0.349764	2.92154e-05	0.00056839	0.385905	0.405979
0	GATM	-4.20278	-0.339054	2.63653e-05	0.000519031	0.248681	0.286564
0	PRDM11	-4.20771	-0.358779	2.57972e-05	0.000510012	0.263583	0.298808
0	TLE3	-4.22605	-0.281519	2.37831e-05	0.000474231	0.299286	0.334649
0	ARID3B	-4.25601	-0.554672	2.0811e-05	0.000416732	0.117044	0.160824
0	INSIG2	-4.29036	-0.343537	1.78381e-05	0.000360646	0.288109	0.321675
0	ARID3A	-4.3326	-0.256264	1.47357e-05	0.000302401	0.352375	0.385383
0	ARHGAP27	-4.3765	-0.250304	1.20598e-05	0.000253081	0.363241	0.395735
0	MAP3K13	-4.43195	-0.591991	9.33858e-06	0.000199401	0.11425	0.159932
0	RHOH	-4.44759	-0.432964	8.68377e-06	0.000186621	0.168581	0.213477
0	ARHGAP45	-4.45287	-0.291701	8.47317e-06	0.000183112	0.291835	0.331189
0	HELB	-4.45736	-0.487515	8.29763e-06	0.000179653	0.131326	0.177987
0	IVD	-4.45878	-0.283322	8.24294e-06	0.000178636	0.303322	0.342487
0	NACA	-4.48178	-0.348506	7.40215e-06	0.000162079	0.293387	0.32754
0	PPA1	-4.48453	-0.556531	7.30733e-06	0.000160154	0.119218	0.165716
0	MYO10	-4.48541	-0.458754	7.27721e-06	0.000159796	0.178206	0.221802
0	GSTM2	-4.48774	-0.47189	7.19834e-06	0.000158214	0.161751	0.206287
0	DSE	-4.48785	-0.259521	7.19452e-06	0.000158214	0.351133	0.387869
0	ALDH2	-4.49228	-0.326397	7.04663e-06	0.000155409	0.263272	0.303403
0	GPR183	-4.51175	-0.548575	6.42962e-06	0.000144185	0.151506	0.195908
0	STAB1	-4.52378	-0.263228	6.07444e-06	0.000136748	0.338404	0.37849
0	GCA	-4.5239	-0.269459	6.07099e-06	0.000136748	0.337162	0.374463
0	IKZF2	-4.54075	-0.300894	5.60533e-06	0.000126556	0.287799	0.330486
0	IQCJ	-4.54961	-0.508667	5.37448e-06	0.000121699	0.145607	0.191989
0	N4BP2L1	-4.56457	-0.272997	5.00511e-06	0.000113668	0.312015	0.352893
0	ADAMTS10	-4.58077	-0.297231	4.6326e-06	0.000105626	0.303011	0.342001
0	ICA1	-4.58229	-0.618616	4.59914e-06	0.000105168	0.114561	0.161635
0	MAGI1	-4.58713	-0.329338	4.49391e-06	0.000102863	0.265135	0.309458
0	HRH2	-4.58815	-0.305354	4.47183e-06	0.000102459	0.276001	0.318945
0	YWHAH	-4.61219	-0.250633	3.98442e-06	9.20183e-05	0.377833	0.413628
0	IL16	-4.64885	-0.382316	3.33784e-06	7.74712e-05	0.212977	0.258345
0	NARF	-4.75578	-0.45285	1.97683e-06	4.7528e-05	0.169823	0.217774
0	SH3PXD2B	-4.76641	-0.528456	1.87539e-06	4.55313e-05	0.149643	0.197503
0	PITPNC1	-4.79009	-0.305038	1.66703e-06	4.07283e-05	0.29556	0.339676
0	DPH6-AS1	-4.79494	-0.435675	1.62724e-06	3.9798e-05	0.196523	0.243101
0	GLUL	-4.84208	-0.315414	1.28486e-06	3.17588e-05	0.379075	0.415277
0	RNF144B	-4.86745	-0.310947	1.13048e-06	2.81832e-05	0.439615	0.469633
0	CEBPD	-5.00445	-0.311885	5.60222e-07	1.46427e-05	0.399255	0.431251
0	GAPDH	-5.00483	-0.48919	5.591e-07	1.46299e-05	0.221049	0.266265
0	FAM157C	-5.01215	-0.337013	5.38249e-07	1.41161e-05	0.309531	0.34792
0	LEPR	-5.02824	-0.375993	4.94991e-07	1.30851e-05	0.249612	0.297889
0	PDK3	-5.04887	-0.344473	4.44422e-07	1.18974e-05	0.287799	0.331351
0	RALGPS2	-5.05929	-0.252387	4.20821e-07	1.13309e-05	0.390872	0.434711
0	RP11-693J15.5	-5.11012	-0.680834	3.21959e-07	8.86438e-06	0.113319	0.165581
0	LDHA	-5.2309	-0.559352	1.68684e-07	4.81568e-06	0.164545	0.215612
0	C10ORF128	-5.24501	-0.353618	1.56277e-07	4.50582e-06	0.24154	0.295159
0	FAM117B	-5.32474	-0.404108	1.01097e-07	2.98531e-06	0.229121	0.281834
0	STK17B	-5.34909	-0.518788	8.83993e-08	2.63382e-06	0.1543	0.209233
0	PRDM1	-5.36788	-0.568793	7.96655e-08	2.39203e-06	0.159578	0.213098
0	ELOVL6	-5.53239	-0.637558	3.15903e-08	9.86824e-07	0.129773	0.186691
0	GPR160	-5.63053	-0.667491	1.79652e-08	5.71195e-07	0.123875	0.181907
0	TRIM36	-5.64631	-0.384661	1.63927e-08	5.24275e-07	0.26855	0.321188
0	TRANK1	-5.68681	-0.31902	1.29431e-08	4.19568e-07	0.340267	0.391653
0	INSR	-5.71701	-0.381224	1.08416e-08	3.5642e-07	0.274759	0.328648
0	ADGRB3	-5.72732	-0.550707	1.0203e-08	3.36381e-07	0.186278	0.243182
0	FAM177B	-5.73567	-0.384523	9.71278e-09	3.23434e-07	0.260478	0.31608
0	MRC2	-5.7541	-0.325591	8.71059e-09	2.91736e-07	0.317914	0.372057
0	GGA2	-5.76327	-0.267332	8.2498e-09	2.77504e-07	0.452654	0.490661
0	RAP1GAP2	-5.77829	-0.267268	7.54659e-09	2.5533e-07	0.426265	0.472984
0	SIRPB2	-5.79706	-0.363394	6.74863e-09	2.30346e-07	0.278174	0.333676
0	GLIS3	-5.83834	-0.482463	5.27243e-09	1.82374e-07	0.225706	0.282023
0	FAM198B	-5.87605	-0.481839	4.20168e-09	1.46428e-07	0.181931	0.242722
0	EXT1	-6.0445	-0.373132	1.49877e-09	5.41846e-08	0.260789	0.324864
0	PLB1	-6.09687	-0.478093	1.08164e-09	4.02323e-08	0.206768	0.267508
0	DDIT4	-6.10613	-0.585887	1.02078e-09	3.80905e-08	0.228811	0.281861
0	HK2	-6.18476	-0.302389	6.21953e-10	2.37427e-08	0.450792	0.490499
0	HIST2H2BF	-6.22979	-0.341836	4.67072e-10	1.80079e-08	0.400186	0.444252
0	IRS2	-6.2743	-0.262472	3.51199e-10	1.37459e-08	0.52344	0.562505
0	GOLGA8A	-6.27655	-0.385563	3.46165e-10	1.35718e-08	0.309842	0.363327
0	PGK1	-6.36945	-0.400926	1.89704e-10	7.60453e-09	0.395529	0.433846
0	FOS	-6.39132	-0.751644	1.64459e-10	6.62691e-09	0.141571	0.205368
0	SELPLG	-6.40001	-0.461641	1.55369e-10	6.28244e-09	0.247749	0.307728
0	ITGA9	-6.43071	-0.293444	1.27008e-10	5.19906e-09	0.440236	0.497716
0	TMOD2	-6.48199	-0.333226	9.05205e-11	3.7384e-09	0.366656	0.425494
0	GPR155	-6.51813	-0.439036	7.11897e-11	2.96645e-09	0.289041	0.344623
0	RAPGEF4	-6.53585	-0.812289	6.32508e-11	2.6547e-09	0.138777	0.202476
0	GRK5	-6.53628	-0.359876	6.30678e-11	2.65182e-09	0.334368	0.39441
0	ALOX5AP	-6.53723	-0.392121	6.26702e-11	2.63988e-09	0.286247	0.349677
0	SLC43A2	-6.60378	-0.467232	4.00809e-11	1.72274e-09	0.234399	0.299646
0	SIGLEC10	-6.62483	-0.429901	3.47655e-11	1.51106e-09	0.26172	0.326297
0	PDXK	-6.6508	-0.324454	2.91507e-11	1.28142e-09	0.393667	0.449253
0	TNFRSF1B	-6.65802	-0.271671	2.77543e-11	1.22467e-09	0.589879	0.617726
0	FAM49A	-6.68479	-0.286833	2.31263e-11	1.02828e-09	0.499845	0.550342
0	C12ORF75	-6.82327	-0.374695	8.89888e-12	4.10622e-10	0.348029	0.408925
0	SEC14L1	-6.85045	-0.265393	7.36183e-12	3.42421e-10	0.578081	0.615131
0	RP1-34B20.21	-6.86041	-0.857528	6.86642e-12	3.20019e-10	0.116734	0.18661
0	BCO2	-6.89611	-0.50091	5.34444e-12	2.50595e-10	0.239988	0.305376
0	SESN3	-6.98729	-0.33158	2.80247e-12	1.3665e-10	0.434648	0.487904
0	GIMAP8	-6.99608	-0.466496	2.63227e-12	1.28621e-10	0.263893	0.330027
0	PSD3	-7.03016	-0.487652	2.06292e-12	1.02309e-10	0.266066	0.330892
0	EMB	-7.1119	-0.463809	1.1446e-12	5.76274e-11	0.265135	0.333865
0	C10ORF54	-7.16326	-0.257286	7.87799e-13	4.01864e-11	0.550761	0.60559
0	PRKD3	-7.17011	-0.268821	7.49373e-13	3.8395e-11	0.546725	0.594832
0	JAK3	-7.33356	-0.40662	2.24114e-13	1.19032e-11	0.331264	0.398519
0	NLRP1	-7.36942	-0.343146	1.71373e-13	9.20735e-12	0.410742	0.477147
0	PRAM1	-7.38867	-0.333314	1.48308e-13	8.04259e-12	0.434027	0.495121
0	SLC15A2	-7.40226	-0.346689	1.3389e-13	7.2948e-12	0.434337	0.491283
0	S100Z	-7.44549	-0.421973	9.65835e-14	5.33739e-12	0.330332	0.399546
0	PHF3	-7.5082	-0.260017	5.99451e-14	3.33651e-12	0.593915	0.636133
0	ZFP36L2	-7.55902	-0.271466	4.06118e-14	2.28787e-12	0.64421	0.69384
0	HSP90AB1	-7.61822	-0.409973	2.57201e-14	1.45957e-12	0.405154	0.458361
0	HIST1H2BD	-7.64631	-0.867323	2.06833e-14	1.18533e-12	0.124495	0.203071
0	GAK	-7.69817	-0.319023	1.3803e-14	7.98922e-13	0.513195	0.555045
0	WNT5A	-7.72014	-0.46886	1.16204e-14	6.74274e-13	0.288109	0.361732
0	MAP3K8	-7.8245	-0.463857	5.09658e-15	3.03312e-13	0.317293	0.38695
0	MARCH3	-7.84727	-0.303085	4.25186e-15	2.54345e-13	0.569078	0.635268
0	TMEM176B	-7.86915	-0.770813	3.57069e-15	2.15262e-13	0.145296	0.226153
0	NLRC5	-7.90111	-0.488711	2.76435e-15	1.6796e-13	0.293698	0.363408
0	HIF1A	-7.90428	-0.263033	2.69486e-15	1.64167e-13	0.676808	0.733303
0	DNAJB1	-7.92858	-0.944959	2.2167e-15	1.3611e-13	0.14778	0.224451
0	CPVL	-8.01163	-0.268685	1.13198e-15	7.12011e-14	0.674014	0.729816
0	XIST	-8.04651	-0.824099	8.51888e-16	5.38755e-14	0.144986	0.228775
0	RASSF2	-8.07216	-0.380034	6.90654e-16	4.40387e-14	0.420987	0.483742
0	NOS1AP	-8.15728	-0.87635	3.42668e-16	2.21541e-14	0.128221	0.212963
0	SLC2A3	-8.20608	-1.02178	2.28529e-16	1.49835e-14	0.14126	0.221883
0	CSF3R	-8.2101	-0.259133	2.21013e-16	1.45731e-14	0.666253	0.708976
0	PDK1	-8.21194	-0.57449	2.17653e-16	1.43924e-14	0.258615	0.334378
0	TBC1D9	-8.22007	-0.294453	2.03387e-16	1.35261e-14	0.559143	0.625645
0	TBC1D8	-8.25209	-0.503491	1.55645e-16	1.04107e-14	0.343061	0.412196
0	NEK10	-8.34379	-0.744425	7.19472e-17	4.95517e-15	0.177585	0.261291
0	LINC01091	-8.35781	-0.660412	6.38927e-17	4.42671e-15	0.244024	0.322323
0	UBC	-8.36123	-0.552333	6.20679e-17	4.31316e-15	0.366656	0.423386
0	TCF4	-8.46269	-0.254794	2.61278e-17	1.85451e-15	0.745731	0.810255
0	HSPH1	-8.47876	-0.388662	2.276e-17	1.62541e-15	0.535238	0.591183
0	PTCHD4	-8.51232	-0.787232	1.70485e-17	1.22128e-15	0.173238	0.258805
0	FCGR3A	-8.56036	-0.428258	1.12517e-17	8.16101e-16	0.401428	0.467714
0	PIP5K1B	-8.6216	-0.457133	6.60222e-18	4.83399e-16	0.349891	0.428035
0	DUSP1	-8.62505	-0.771815	6.40671e-18	4.70569e-16	0.201801	0.283104
0	EML1	-8.64056	-0.572651	5.59384e-18	4.14802e-16	0.263893	0.345515
0	HIF1A-AS2	-8.66212	-0.861931	4.63063e-18	3.467e-16	0.277243	0.345271
0	BBX	-8.68875	-0.28494	3.66454e-18	2.77049e-16	0.668736	0.730627
0	PCED1B	-8.8598	-0.45211	8.01555e-19	6.32792e-17	0.331574	0.419737
0	MRC1	-8.86254	-1.18868	7.82099e-19	6.21661e-17	0.106799	0.196773
0	DIP2A	-8.8712	-0.284804	7.23632e-19	5.77165e-17	0.647935	0.697678
0	CIITA	-8.9029	-0.294291	5.44055e-19	4.36938e-17	0.63055	0.686326
0	PLSCR1	-8.92284	-0.353244	4.54476e-19	3.6754e-17	0.534927	0.589345
0	CCND3	-9.00352	-0.271511	2.18594e-19	1.78647e-17	0.726793	0.788902
0	RP11-187O7.3	-9.07892	-1.28372	1.09659e-19	9.02545e-18	0.119839	0.209017
0	RNF149	-9.17512	-0.281246	4.5107e-20	3.83492e-18	0.707544	0.766954
0	PRKCA	-9.17532	-0.289529	4.50253e-20	3.83492e-18	0.752872	0.82158
0	GALNT10	-9.29286	-0.302899	1.50195e-20	1.32047e-18	0.649488	0.723113
0	KDM4B	-9.45177	-0.408013	3.33162e-21	3.00883e-19	0.511021	0.562073
0	CSGALNACT1	-9.46746	-0.288734	2.86728e-21	2.60979e-19	0.883887	0.940049
0	ALOX5	-9.5797	-0.274291	9.73241e-22	9.07186e-20	0.750388	0.818823
0	ARHGEF6	-9.61531	-0.312552	6.89033e-22	6.44857e-20	0.616268	0.684758
0	DCAF6	-9.66006	-0.305041	4.45602e-22	4.20424e-20	0.696057	0.754142
0	FCGR2A	-9.71567	-0.376478	2.58554e-22	2.47977e-20	0.53027	0.602265
0	TPT1	-9.87529	-0.571882	5.32811e-23	5.15273e-21	0.439305	0.502392
0	SEMA4D	-9.98953	-0.418137	1.6938e-23	1.68726e-21	0.44955	0.534151
0	PHF21A	-9.99519	-0.315184	1.59977e-23	1.61438e-21	0.715927	0.771198
0	TTC7A	-10.0006	-0.300927	1.51478e-23	1.53528e-21	0.7448	0.802146
0	STK17A	-10.0046	-0.564875	1.45408e-23	1.48023e-21	0.322881	0.412277
0	CH17-437K3.1	-10.0363	-0.2915	1.05604e-23	1.08936e-21	0.819	0.861232
0	RASSF4	-10.1164	-0.363963	4.67335e-24	4.88597e-22	0.562869	0.633078
0	SLC2A5	-10.2433	-0.315638	1.26897e-24	1.3699e-22	0.694194	0.745682
0	UTRN	-10.2489	-0.293238	1.19711e-24	1.29836e-22	0.777398	0.832797
0	ZNF292	-10.2772	-0.275838	8.92775e-25	9.82053e-23	0.837007	0.868314
0	SYTL3	-10.3968	-0.510432	2.56313e-25	2.88787e-23	0.436821	0.514204
0	ZNF124	-10.4463	-0.480143	1.52423e-25	1.72572e-23	0.437131	0.516474
0	MPZL1	-10.5005	-0.411739	8.5905e-26	9.7738e-24	0.511953	0.594345
0	PCNX2	-10.6408	-0.268697	1.92561e-26	2.22355e-24	0.849115	0.895748
0	SLC9A9	-10.6794	-0.254638	1.27118e-26	1.47521e-24	0.962434	0.986594
0	ADGRG1	-10.6948	-0.361819	1.0769e-26	1.26236e-24	0.593604	0.664
0	IRAK3	-10.7489	-0.308365	5.99915e-27	7.10409e-25	0.772741	0.839663
0	SPNS2	-10.8459	-0.495469	2.08472e-27	2.49414e-25	0.411363	0.500149
0	P4HA1	-11.2002	-0.422684	4.06932e-29	5.07789e-27	0.681155	0.749196
0	HSPA1B	-11.2147	-0.572833	3.45275e-29	4.35534e-27	0.354238	0.458307
0	ERC2	-11.2694	-0.984043	1.85799e-29	2.40916e-27	0.185967	0.296754
0	SIPA1L1	-11.3986	-0.47106	4.24878e-30	5.6351e-28	0.580255	0.663567
0	MIR99AHG	-11.4023	-0.36274	4.07116e-30	5.43055e-28	0.712512	0.80166
0	NCF1	-11.4816	-0.721455	1.63263e-30	2.25555e-28	0.260789	0.37076
0	MYO1F	-11.4831	-0.309017	1.60387e-30	2.22909e-28	0.748215	0.802984
0	NEDD4L	-11.625	-0.389833	3.07687e-31	4.32813e-29	0.688606	0.750872
0	SPATA6	-11.6494	-0.441863	2.30959e-31	3.26863e-29	0.515678	0.624294
0	PTPRE	-11.7435	-0.296464	7.6271e-32	1.08604e-29	0.893822	0.931859
0	ADAM28	-11.8149	-0.251218	3.26784e-32	4.74041e-30	0.958088	0.982053
0	MAN2A1	-12.0091	-0.430058	3.18224e-33	4.82744e-31	0.721515	0.78328
0	SLC8A1	-12.0113	-0.252638	3.09789e-33	4.7304e-31	0.976715	0.993513
0	CTTNBP2	-12.1077	-0.348186	9.61163e-34	1.48724e-31	0.800062	0.868043
0	BNIP3L	-12.2165	-0.632644	2.53893e-34	4.00874e-32	0.454207	0.539098
0	HCLS1	-12.2374	-0.325565	1.96242e-34	3.11971e-32	0.777709	0.834608
0	RP11-480C22.1	-12.2588	-0.873837	1.50726e-34	2.42941e-32	0.255511	0.369246
0	FYB	-12.2693	-0.275551	1.32337e-34	2.14794e-32	0.96616	0.98908
0	PPARD	-12.4628	-0.448897	1.19042e-35	2.04664e-33	0.604471	0.692543
0	IL1RAP	-12.4842	-0.521261	9.10468e-36	1.57701e-33	0.479975	0.580804
0	PRKAG2	-12.5785	-0.373086	2.7731e-36	4.91325e-34	0.754424	0.81539
0	NFIA	-12.6122	-0.434662	1.80807e-36	3.22811e-34	0.620925	0.730221
0	CHST15	-12.6813	-0.475463	7.51034e-37	1.36184e-34	0.558212	0.657026
0	SKI	-12.7632	-0.405025	2.63258e-37	4.92759e-35	0.648246	0.729708
0	SERPINB9	-13.0782	-0.565752	4.38509e-39	8.55277e-37	0.485874	0.575912
0	SRGN	-13.286	-0.683931	2.79019e-40	5.53507e-38	0.482769	0.579858
0	SLC4A7	-13.3135	-0.35733	1.93148e-40	3.86463e-38	0.826451	0.880044
0	MCF2L	-13.3654	-0.322271	9.62518e-41	1.97699e-38	0.83918	0.882126
0	C3	-13.7037	-0.308156	9.64172e-43	2.07208e-40	0.902515	0.929697
0	CECR2	-13.8068	-1.38689	2.31906e-43	5.12623e-41	0.127911	0.267616
0	LRRK2	-13.8253	-0.562131	1.79243e-43	4.03906e-41	0.541136	0.635187
0	CPED1	-13.8708	-0.375003	9.52323e-44	2.167e-41	0.846011	0.914425
0	KCNIP1	-13.9465	-0.514709	3.30314e-44	7.66658e-42	0.642658	0.742493
0	ATM	-14.1594	-0.289435	1.63468e-45	3.91144e-43	0.943185	0.973755
0	MIR646HG	-14.4944	-0.548197	1.31495e-47	3.3911e-45	0.58398	0.707814
0	CMIP	-14.5066	-0.297339	1.10032e-47	2.86948e-45	0.929525	0.959753
0	RUNX2	-14.5922	-0.424021	3.14953e-48	8.30687e-46	0.780813	0.870557
0	OXR1	-14.7178	-0.42887	4.95584e-49	1.32213e-46	0.900962	0.939319
0	MS4A6A	-14.7763	-0.505365	2.08347e-49	5.68911e-47	0.601366	0.712815
0	TMEM163	-14.9032	-0.843657	3.1432e-50	8.78959e-48	0.331574	0.474633
0	PFKFB3	-14.9167	-0.638035	2.56534e-50	7.26117e-48	0.495498	0.602725
0	ST6GALNAC3	-15.074	-0.4778	2.40233e-51	6.96976e-49	0.857498	0.905317
0	AOAH	-15.3836	-0.435483	2.10946e-53	6.44218e-51	0.843837	0.941184
0	TENM4	-15.832	-0.527133	1.87141e-56	6.20506e-54	0.636759	0.756007
0	ABCC4	-16.0289	-0.356437	8.03478e-58	2.82557e-55	0.925179	0.95305
0	PDE4B	-16.7603	-0.653313	4.76115e-63	1.97332e-60	0.538653	0.698489
0	TIAM1	-16.9679	-0.562914	1.41881e-64	6.09828e-62	0.642658	0.759251
0	RASGEF1C	-17.0375	-0.582456	4.32685e-65	1.89483e-62	0.675567	0.762819
0	CH507-513H4.1	-17.1393	-0.391671	7.5589e-66	3.37389e-63	0.961192	0.978647
0	HSP90AA1	-17.8148	-0.763095	5.42651e-71	2.73803e-68	0.631791	0.740276
0	IGSF21	-18.158	-0.551812	1.10967e-73	6.13223e-71	0.723688	0.849934
0	HIST1H2AC	-18.217	-0.725693	3.78632e-74	2.14343e-71	0.535858	0.673352
0	FRMD4A	-18.3793	-0.321479	1.92508e-75	1.11703e-72	0.996585	0.999297
0	FAM13A	-18.5618	-0.618715	6.54791e-77	3.9994e-74	0.71127	0.838527
0	LDLRAD4	-18.8329	-0.345799	4.05895e-79	2.6169e-76	0.987581	0.997838
0	HSPA1A	-19.3464	-0.859283	2.18494e-83	1.53674e-80	0.446135	0.618834
0	INPP5D	-19.776	-0.35315	4.79095e-87	3.47494e-84	0.971127	0.989269
0	SLC25A37	-19.7835	-0.647156	4.12691e-87	3.08986e-84	0.739211	0.836419
0	FOXP2	-19.8005	-0.695163	2.94624e-87	2.2794e-84	0.648867	0.784874
0	PREX1	-21.7341	-0.424525	9.76752e-105	9.44601e-102	0.955914	0.986107
0	MVB12B	-22.09	-0.694824	3.9417e-108	4.15849e-105	0.627134	0.774901
0	TLN2	-22.5277	-0.803972	2.22305e-112	2.457e-109	0.574045	0.72614
0	SRGAP1	-24.0071	-0.699205	2.34229e-127	3.88319e-124	0.806892	0.91602
0	DENND3	-27.0589	-0.715518	3.00234e-161	1.1614e-157	0.849426	0.939671
1	MEF2A	39.5739	0.546668	0	0	1	0.999619
1	SFMBT2	37.6497	0.631351	0	2.56344e-306	0.99971	0.997416
1	C22ORF34	35.7358	1.48989	1.10091e-279	6.38803e-276	0.684058	0.35637
1	PICALM	35.2114	0.52487	1.33748e-271	5.17384e-268	0.99971	0.997906
1	KHDRBS3	34.4461	1.1252	5.15556e-260	1.70944e-256	0.877391	0.718396
1	A2M	31.4598	0.836236	3.07906e-217	5.95541e-214	0.89942	0.7927
1	RP11-489O18.1	31.3428	1.15803	1.21929e-215	2.1769e-212	0.70087	0.455505
1	DLEU7	31.203	1.12138	9.69659e-214	1.60756e-210	0.734493	0.474489
1	RNF150	30.3831	1.01355	9.1805e-203	1.42053e-199	0.805507	0.603922
1	CX3CR1	30.1817	1.05251	4.11938e-200	5.97567e-197	0.786667	0.551485
1	SYNDIG1	29.8473	0.827521	9.52464e-196	1.30039e-192	0.975362	0.895398
1	IFNGR1	29.7648	0.682561	1.11501e-194	1.43774e-191	0.94087	0.885879
1	DOCK4	28.7336	0.36564	1.45184e-181	1.60463e-178	1	1
1	ST6GALNAC3	28.402	0.830358	1.91305e-177	2.01826e-174	0.97942	0.894174
1	FAM118A	28.1074	1.00938	7.95728e-174	7.38754e-171	0.691594	0.454417
1	ARHGAP22	27.7425	0.533898	2.14587e-169	1.9156e-166	0.991014	0.957245
1	BP-21264C1.2	27.1647	1.43375	1.69671e-162	1.40645e-159	0.491304	0.224244
1	PER3	26.0935	1.53529	4.32302e-150	3.45991e-147	0.454493	0.194245
1	IL6ST	25.4972	0.52172	2.11726e-143	1.63805e-140	0.964928	0.923792
1	FRMD4A	25.3756	0.365836	4.69434e-142	3.51469e-139	0.99971	0.999021
1	RP11-289H16.1	25.2052	0.74849	3.5156e-140	2.47264e-137	0.801159	0.649124
1	NAV3	24.9997	0.623782	6.16005e-138	4.08499e-135	0.992174	0.917755
1	AZIN2	24.7403	1.21917	3.94724e-135	2.54487e-132	0.512464	0.268712
1	P2RY13	24.5988	1.1447	1.30231e-133	8.16936e-131	0.528406	0.289844
1	SOCS6	24.4287	0.735181	8.47687e-132	5.17758e-129	0.827536	0.713229
1	CSF1R	23.447	0.45393	1.4179e-121	8.43833e-119	0.972464	0.935188
1	NAIP	23.3429	0.464583	1.62567e-120	9.43293e-118	0.962899	0.916775
1	LINC01141	22.5988	0.791177	4.45408e-113	2.40416e-110	0.7	0.519419
1	KCNQ3	22.566	0.569726	9.34575e-113	4.92989e-110	0.95942	0.923194
1	SEMA4D	22.4774	0.76638	6.90501e-112	3.48403e-109	0.692754	0.511858
1	CLEC7A	22.3932	0.740532	4.58832e-111	2.26585e-108	0.711884	0.525593
1	PRDM11	22.0622	1.1457	7.29412e-108	3.52701e-105	0.489565	0.277823
1	ZSWIM6	22.043	0.414685	1.11508e-107	5.28185e-105	0.982609	0.973074
1	MED12L	21.0104	0.934431	5.26563e-98	2.35029e-95	0.51971	0.31046
1	RP11-707A18.1	20.7568	0.597189	1.06334e-95	4.57038e-93	0.849565	0.739556
1	BLNK	20.7187	0.477274	2.34874e-95	9.91167e-93	0.924348	0.85569
1	QKI	20.4534	0.261791	5.60082e-93	2.28061e-90	1	0.999238
1	ATP8B4	20.4426	0.379696	6.98463e-93	2.79506e-90	0.992174	0.974353
1	GRID2	20.4113	1.55028	1.32729e-92	5.22144e-90	0.466377	0.297025
1	NAALADL2	20.2924	0.839144	1.50218e-91	5.81093e-89	0.642899	0.464534
1	RP11-96H19.1	20.2216	1.29474	6.31715e-91	2.40362e-88	0.424348	0.233056
1	RSRP1	20.1448	0.648592	2.99067e-90	1.1018e-87	0.715362	0.552029
1	LRRC37A3	20.0992	0.677669	7.49887e-90	2.71951e-87	0.67913	0.519936
1	PLAGL1	20.0445	0.741338	2.25227e-89	8.04235e-87	0.661159	0.483681
1	LINC01268	19.9709	0.96815	9.85609e-89	3.46606e-86	0.490435	0.302383
1	PRKCA	19.5483	0.536776	4.26918e-85	1.47892e-82	0.891594	0.808992
1	FMNL3	19.4441	0.425566	3.27088e-84	1.11643e-81	0.921739	0.869506
1	CDH23	19.2863	1.04504	7.00133e-83	2.35508e-80	0.443768	0.257398
1	PPP6R2	19.267	0.560303	1.0174e-82	3.37342e-80	0.776812	0.653231
1	ARHGAP24	18.7917	0.280385	8.83447e-79	2.77092e-76	0.99942	0.999075
1	P2RY12	18.7897	0.512238	9.16236e-79	2.83544e-76	0.924348	0.823542
1	FAM105A	18.4403	0.595715	6.24158e-76	1.85727e-73	0.71913	0.585482
1	AOAH	18.1697	0.380934	8.97441e-74	2.63666e-71	0.968116	0.930129
1	UTY	18.1608	0.567078	1.05398e-73	3.05787e-71	0.791014	0.639469
1	RP11-238K6.1	17.9531	1.31069	4.54003e-72	1.28505e-69	0.332464	0.150702
1	KANSL1	17.907	0.29171	1.03936e-71	2.87185e-69	0.993043	0.97846
1	ZFP36L2	17.6468	0.542009	1.07777e-69	2.94295e-67	0.792464	0.680238
1	OLR1	17.3549	0.644605	1.81227e-67	4.83482e-65	0.622029	0.458497
1	DLEU1	17.3206	0.542316	3.29151e-67	8.68135e-65	0.717391	0.57939
1	ITPR2	17.1306	0.257787	8.77478e-66	2.18992e-63	0.99971	0.997171
1	NSF	17.0652	0.54637	2.69654e-65	6.58807e-63	0.731014	0.608545
1	ITGAX	17.039	0.497147	4.21579e-65	1.01925e-62	0.775072	0.653476
1	NLGN4Y	17.0149	0.812747	6.37234e-65	1.52476e-62	0.504638	0.346388
1	FCHSD2	17.0125	0.301684	6.63679e-65	1.57184e-62	0.989275	0.977725
1	LPCAT2	16.8203	0.32426	1.73204e-63	3.98027e-61	0.970725	0.94895
1	RP11-480C22.1	16.7723	0.726073	3.88916e-63	8.84974e-61	0.528986	0.344294
1	ITM2B	16.602	0.345263	6.74225e-62	1.50469e-59	0.91913	0.886885
1	GPR34	16.4847	0.591704	4.72965e-61	1.04548e-58	0.635072	0.485585
1	TBC1D4	16.1591	0.473037	9.8038e-59	2.03166e-56	0.796522	0.72234
1	PALD1	15.8189	0.282564	2.30647e-56	4.61493e-54	0.97942	0.964154
1	ZNF710	15.8047	0.360164	2.8859e-56	5.72494e-54	0.926377	0.872661
1	PEAK1	15.7772	0.494644	4.46354e-56	8.77955e-54	0.777681	0.703955
1	VASH1	15.6725	0.523969	2.33255e-55	4.54946e-53	0.673913	0.541068
1	ZNRF2	15.6518	0.480097	3.23057e-55	6.14604e-53	0.756812	0.675506
1	NR1D2	15.6475	0.994704	3.45371e-55	6.51712e-53	0.355362	0.196502
1	AP000476.1	15.5567	0.619611	1.43266e-54	2.66017e-52	0.548116	0.37772
1	RASGEF1C	15.3187	0.457849	5.73492e-53	1.04809e-50	0.831304	0.748749
1	C10ORF54	15.2924	0.483472	8.59408e-53	1.55835e-50	0.712754	0.590731
1	CSF2RA	15.1684	0.424354	5.72389e-52	1.02986e-49	0.787826	0.689295
1	P3H2	15.0238	0.621928	5.12989e-51	8.95224e-49	0.562899	0.416612
1	TMEM156	15.0002	0.40461	7.31741e-51	1.26744e-48	0.822319	0.751632
1	EML4	14.9532	0.365947	1.4846e-50	2.51515e-48	0.863188	0.801458
1	MARCH3	14.7941	0.495619	1.59988e-49	2.69081e-47	0.727246	0.620839
1	MIR646HG	14.7495	0.487069	3.10019e-49	5.13967e-47	0.774493	0.690709
1	JAZF1	14.6234	0.268964	1.99157e-48	3.23246e-46	0.991304	0.983056
1	RASAL2	14.5428	0.347444	6.49252e-48	1.02511e-45	0.931884	0.892706
1	UVRAG	14.4699	0.293007	1.87734e-47	2.90488e-45	0.93971	0.909786
1	SYK	14.4583	0.265948	2.22372e-47	3.41805e-45	0.968406	0.950011
1	ERMAP	14.3463	0.742803	1.12324e-46	1.68197e-44	0.421449	0.28076
1	IL13RA1	14.3427	0.352392	1.18367e-46	1.76109e-44	0.844928	0.796045
1	TTC28	14.2794	0.471576	2.94176e-46	4.34893e-44	0.750145	0.656495
1	ANKUB1	14.2673	0.649953	3.50111e-46	5.14309e-44	0.482609	0.346415
1	PARP14	14.261	0.434137	3.83191e-46	5.56937e-44	0.730435	0.636233
1	OSBPL11	14.2309	0.504877	5.89174e-46	8.4412e-44	0.622029	0.483518
1	CLEC2D	14.133	0.536308	2.3773e-45	3.34407e-43	0.591884	0.464045
1	ITGA9	14.0975	0.526668	3.93475e-45	5.50154e-43	0.612464	0.481914
1	TANC1	14.0537	0.485191	7.30724e-45	1.00953e-42	0.689275	0.570061
1	ADAM28	14.0153	0.258753	1.25694e-44	1.72625e-42	0.993913	0.97884
1	DIAPH2	14.0075	0.257559	1.40213e-44	1.91432e-42	0.991304	0.975957
1	SRGAP2C	13.9088	0.256208	5.60104e-44	7.47128e-42	0.968986	0.953982
1	BCAR3	13.9044	0.534959	5.95647e-44	7.89998e-42	0.583478	0.457001
1	CD74	13.866	0.330319	1.01741e-43	1.33414e-41	0.881739	0.84016
1	WASF2	13.8568	0.286891	1.15744e-43	1.50923e-41	0.906087	0.878019
1	ZNF609	13.8348	0.336281	1.57094e-43	2.02564e-41	0.857681	0.81027
1	TM6SF1	13.8233	0.386913	1.84329e-43	2.36369e-41	0.778841	0.698025
1	TRIM22	13.7413	0.421842	5.73984e-43	7.16245e-41	0.726377	0.622226
1	METTL9	13.5927	0.566398	4.4257e-42	5.43494e-40	0.527246	0.400484
1	NAV2	13.4535	0.810426	2.93602e-41	3.51263e-39	0.405797	0.275919
1	GLCE	13.4396	0.582032	3.54489e-41	4.21933e-39	0.511014	0.38868
1	SNX29	13.3846	0.270249	7.44446e-41	8.81561e-39	0.957971	0.927872
1	PDE4D	13.3602	0.888037	1.03354e-40	1.21769e-38	0.373333	0.245784
1	IGSF6	13.3584	0.816944	1.05865e-40	1.24097e-38	0.350145	0.214562
1	CD84	13.3391	0.452885	1.37071e-40	1.5987e-38	0.649275	0.536173
1	CSF3R	13.301	0.3715	2.28265e-40	2.63584e-38	0.79942	0.696747
1	ABCC4	13.2968	0.288548	2.41542e-40	2.77534e-38	0.975362	0.948515
1	RP11-219A15.1	13.2121	0.616698	7.46671e-40	8.53706e-38	0.464348	0.338256
1	RP11-472N13.3	13.2059	0.832366	8.10893e-40	9.22589e-38	0.341739	0.208388
1	LPXN	13.1495	0.539474	1.7128e-39	1.92981e-37	0.526087	0.401708
1	RIN2	13.1412	0.376044	1.91069e-39	2.13208e-37	0.79942	0.731206
1	HLA-DPB1	13.0943	0.566983	3.54978e-39	3.94212e-37	0.491594	0.369234
1	RCSD1	13.0687	0.307419	4.96921e-39	5.46613e-37	0.88087	0.841574
1	DST	13.068	0.320491	5.01505e-39	5.49053e-37	0.904928	0.85365
1	SRSF11	13.0274	0.386594	8.54534e-39	9.26811e-37	0.734783	0.635689
1	IGF1	12.986	1.05862	1.46925e-38	1.57877e-36	0.274203	0.140421
1	ARHGAP21	12.9627	0.32525	1.99125e-38	2.12981e-36	0.848696	0.806897
1	PIGL	12.9594	0.900365	2.07749e-38	2.21186e-36	0.311014	0.178742
1	MTURN	12.9375	0.639834	2.76573e-38	2.93117e-36	0.431304	0.304721
1	LIPG	12.9258	1.50264	3.2176e-38	3.39456e-36	0.216232	0.0841221
1	APPL2	12.8834	0.324215	5.57864e-38	5.85884e-36	0.833913	0.785411
1	ZNF721	12.8427	0.516677	9.45559e-38	9.88578e-36	0.53913	0.421535
1	ARHGAP17	12.7448	0.461707	3.33178e-37	3.45226e-35	0.605507	0.487707
1	ZBTB20	12.6849	0.276905	7.1723e-37	7.33711e-35	0.964928	0.938153
1	AIG1	12.6556	0.448618	1.04177e-36	1.0605e-34	0.648116	0.547215
1	ENO4	12.6236	0.91575	1.56413e-36	1.58531e-34	0.301159	0.174636
1	RAPH1	12.5805	0.387355	2.70245e-36	2.71532e-34	0.71913	0.627094
1	MICU3	12.557	0.422131	3.63962e-36	3.64119e-34	0.666087	0.561602
1	HLA-DRB1	12.5521	0.504572	3.86946e-36	3.85451e-34	0.53942	0.422188
1	HLA-DPA1	12.5277	0.527292	5.26543e-36	5.20045e-34	0.49971	0.374592
1	ETV5	12.4113	0.43464	2.2707e-35	2.23318e-33	0.64029	0.538321
1	PAQR3	12.3385	0.814463	5.61956e-35	5.41203e-33	0.324058	0.200473
1	MIR181A1HG	12.2365	0.520417	1.98509e-34	1.87292e-32	0.48029	0.345953
1	TNFRSF13C	12.1223	1.12275	8.04753e-34	7.41203e-32	0.241449	0.116678
1	HLA-DRA	12.0825	0.434408	1.3063e-33	1.19367e-31	0.613333	0.503481
1	APBA1	12.0605	0.455654	1.70674e-33	1.5474e-31	0.615942	0.512076
1	GALNT2	12.0545	0.261347	1.83575e-33	1.65789e-31	0.931594	0.906196
1	PHACTR1	12.0406	0.517449	2.17247e-33	1.95438e-31	0.509855	0.392107
1	TBC1D9	11.9868	0.383796	4.16685e-33	3.71972e-31	0.698261	0.613006
1	HIVEP3	11.9216	0.347926	9.13573e-33	8.12415e-31	0.862029	0.78688
1	KB-1507C5.4	11.9184	0.670941	9.49607e-33	8.41236e-31	0.378551	0.261967
1	KLF7	11.8917	0.525399	1.30663e-32	1.15312e-30	0.497681	0.380195
1	PTTG1IP	11.869	0.482486	1.71582e-32	1.5028e-30	0.505797	0.387021
1	OSBPL1A	11.8437	0.437659	2.32e-32	2.00923e-30	0.606667	0.503318
1	RGS18	11.8124	0.687164	3.36893e-32	2.89603e-30	0.358841	0.238523
1	KIAA1147	11.7987	0.386891	3.96507e-32	3.38343e-30	0.661159	0.552627
1	DAP	11.7964	0.5004	4.07564e-32	3.46504e-30	0.493913	0.377992
1	DOPEY1	11.7789	0.4045	5.01274e-32	4.2462e-30	0.637391	0.530869
1	PLXDC1	11.7774	1.32791	5.1044e-32	4.30564e-30	0.211014	0.0905679
1	HLA-DQB1	11.7771	0.706105	5.12002e-32	4.30564e-30	0.348116	0.229955
1	CCDC50	11.7614	0.381954	6.17218e-32	5.13464e-30	0.676232	0.587195
1	OSBPL3	11.7412	0.295748	7.83873e-32	6.49775e-30	0.871884	0.828057
1	SYT6	11.6922	0.569462	1.39763e-31	1.15441e-29	0.455072	0.34598
1	TENM4	11.6547	0.334335	2.17225e-31	1.78155e-29	0.810435	0.740454
1	RP11-370I10.2	11.6139	1.29024	3.50304e-31	2.86287e-29	0.213043	0.0947019
1	WLS	11.6016	0.757408	4.04364e-31	3.28157e-29	0.316232	0.195986
1	NUDT3	11.4612	0.461244	2.0667e-30	1.64839e-28	0.528986	0.419903
1	TET3	11.4115	0.375669	3.6632e-30	2.9018e-28	0.68029	0.5987
1	LUC7L3	11.3796	0.288725	5.28643e-30	4.1452e-28	0.806377	0.745104
1	NCKAP1L	11.3395	0.282289	8.35937e-30	6.53269e-28	0.801739	0.753345
1	KLHL5	11.2997	0.304072	1.3164e-29	1.01845e-27	0.804058	0.74845
1	GLIPR1	11.2948	0.528551	1.39153e-29	1.073e-27	0.444928	0.333877
1	RP11-248J23.7	11.2564	0.409884	2.15281e-29	1.64364e-27	0.611014	0.509818
1	ARL5A	11.2477	0.381424	2.37844e-29	1.80995e-27	0.628696	0.531767
1	SRSF5	11.2276	0.379771	2.98383e-29	2.25585e-27	0.625797	0.51912
1	OPRM1	11.2182	0.620319	3.31776e-29	2.50017e-27	0.392174	0.283834
1	RP11-41O4.1	11.1988	0.84626	4.13325e-29	3.10462e-27	0.288406	0.176023
1	CAMK2D	11.1933	0.290082	4.39895e-29	3.29354e-27	0.862029	0.832599
1	INTS10	11.1929	0.40531	4.41626e-29	3.29587e-27	0.601159	0.49728
1	PCNX2	11.1637	0.251956	6.13922e-29	4.56703e-27	0.927536	0.88868
1	KCNQ1	11.1079	0.302697	1.14861e-28	8.43647e-27	0.806377	0.747226
1	USP9Y	11.0227	0.427031	2.97163e-28	2.15536e-26	0.551304	0.43731
1	OXR1	11.0115	0.278292	3.36203e-28	2.43092e-26	0.953913	0.93459
1	CLEC9A	10.9758	0.895671	4.99418e-28	3.57762e-26	0.261739	0.149559
1	NCKAP5	10.9642	0.347695	5.68213e-28	4.04547e-26	0.742029	0.660166
1	GNPTAB	10.9594	0.455914	5.99025e-28	4.25179e-26	0.512464	0.404455
1	FNBP4	10.9474	0.384109	6.84001e-28	4.84014e-26	0.609565	0.507996
1	PLCL2	10.9465	0.280043	6.9079e-28	4.87332e-26	0.84	0.797949
1	IL18	10.9121	0.321269	1.0094e-27	7.078e-26	0.74087	0.665932
1	LOXL3	10.871	0.493219	1.58481e-27	1.10461e-25	0.453623	0.345028
1	ARHGAP32	10.8597	0.4134	1.79267e-27	1.24202e-25	0.592754	0.490399
1	GPATCH2L	10.8441	0.33205	2.12727e-27	1.46947e-25	0.714783	0.640992
1	WIPF3	10.8029	0.7697	3.33487e-27	2.29001e-25	0.305217	0.196747
1	ZNF114	10.7672	0.684769	4.91466e-27	3.35498e-25	0.32087	0.212467
1	SUSD3	10.7161	0.636253	8.55033e-27	5.76899e-25	0.348116	0.240154
1	ULK2	10.6954	0.481972	1.06936e-26	7.17704e-25	0.481739	0.383567
1	RTTN	10.6954	0.358107	1.06991e-26	7.17704e-25	0.753623	0.699413
1	MYO18A	10.6847	0.49993	1.20018e-26	8.02773e-25	0.433043	0.325609
1	PGM5	10.6463	0.293749	1.81439e-26	1.2032e-24	0.804638	0.741922
1	SFPQ	10.616	0.307451	2.51116e-26	1.64181e-24	0.724348	0.653231
1	UHRF1BP1L	10.5946	0.409651	3.15815e-26	2.05324e-24	0.553043	0.454308
1	PLA2G4A	10.5736	0.307268	3.9489e-26	2.54755e-24	0.769565	0.701344
1	KCNK13	10.5736	0.354003	3.95139e-26	2.54755e-24	0.678551	0.591493
1	FEZ2	10.5339	0.326837	6.02885e-26	3.85481e-24	0.703478	0.628128
1	S100PBP	10.5052	0.468147	8.17066e-26	5.19565e-24	0.461449	0.357213
1	MIR99AHG	10.4989	0.29767	8.73642e-26	5.54023e-24	0.85942	0.78843
1	TNRC18	10.4952	0.252681	9.08511e-26	5.74565e-24	0.86058	0.809862
1	BTAF1	10.4426	0.32814	1.58387e-25	9.82934e-24	0.692464	0.613332
1	ARHGEF6	10.4313	0.302175	1.78422e-25	1.10431e-23	0.748696	0.672759
1	ARMCX4	10.4194	0.544853	2.02223e-25	1.2483e-23	0.405217	0.302111
1	TMEM144	10.3957	0.687106	2.59381e-25	1.59688e-23	0.332464	0.231125
1	CIRBP	10.3897	0.517223	2.76332e-25	1.69674e-23	0.40058	0.296481
1	ACSM5	10.2975	0.616883	7.2295e-25	4.38112e-23	0.337391	0.231886
1	ADAMTS17	10.281	0.973288	8.58195e-25	5.18716e-23	0.252464	0.150974
1	C12ORF75	10.2437	0.408843	1.26348e-24	7.55808e-23	0.503478	0.394718
1	METTL7A	10.2318	0.43572	1.42852e-24	8.50152e-23	0.470725	0.367738
1	RPS6KA5	10.1616	0.46912	2.94131e-24	1.73268e-22	0.444058	0.34035
1	RASA4B	10.1485	0.496145	3.36613e-24	1.97792e-22	0.417391	0.315165
1	CYBA	10.1371	0.394343	3.78326e-24	2.21741e-22	0.527536	0.427627
1	SF1	10.12	0.368162	4.50393e-24	2.61995e-22	0.572754	0.478786
1	ARGLU1	10.0859	0.255656	6.3769e-24	3.70019e-22	0.814783	0.758622
1	MCF2L2	10.0757	0.5115	7.07796e-24	4.09675e-22	0.37942	0.273444
1	NKTR	10.0392	0.270415	1.02503e-23	5.90345e-22	0.795652	0.727154
1	TRIM5	10.007	0.43832	1.42043e-23	8.16042e-22	0.458841	0.359416
1	C1ORF112	10.0061	0.642368	1.43243e-23	8.20906e-22	0.322609	0.221987
1	PLD4	9.9757	0.810271	1.94716e-23	1.11041e-21	0.257391	0.156277
1	DNMT3A	9.96384	0.332007	2.19421e-23	1.24517e-21	0.66029	0.578275
1	FAM196B	9.96177	0.755249	2.24026e-23	1.26821e-21	0.267826	0.16596
1	C4ORF19	9.95731	0.618147	2.34324e-23	1.32006e-21	0.323768	0.220899
1	CTTNBP2NL	9.93878	0.280172	2.82273e-23	1.5825e-21	0.772754	0.716928
1	POU2F1	9.93681	0.355757	2.87909e-23	1.61021e-21	0.623478	0.535792
1	RP11-356C4.5	9.89614	0.38314	4.3264e-23	2.40229e-21	0.513623	0.409622
1	RP11-226E21.4	9.88762	0.681062	4.71082e-23	2.6095e-21	0.297681	0.198325
1	PLEK	9.86855	0.432341	5.69806e-23	3.14886e-21	0.450435	0.351501
1	NPC1	9.81721	0.386138	9.49298e-23	5.22114e-21	0.528986	0.436439
1	GRAMD1B	9.75743	0.323156	1.71452e-22	9.29764e-21	0.68087	0.603949
1	NLRP1	9.7322	0.347917	2.19788e-22	1.18085e-20	0.570435	0.462576
1	AP1B1	9.70723	0.2733	2.80873e-22	1.50556e-20	0.761739	0.686521
1	GATAD1	9.64469	0.425345	5.17666e-22	2.74943e-20	0.455362	0.360721
1	TATDN3	9.5371	0.632386	1.46877e-21	7.69531e-20	0.313043	0.217961
1	RIC1	9.46498	0.302631	2.93624e-21	1.519e-19	0.695652	0.622063
1	SPTLC3	9.46488	0.482274	2.93898e-21	1.519e-19	0.404058	0.307985
1	PTGS1	9.46466	0.441143	2.94507e-21	1.519e-19	0.430435	0.336026
1	GMDS-AS1	9.46209	0.323972	3.01845e-21	1.5534e-19	0.70087	0.637973
1	RCBTB1	9.41356	0.525954	4.79591e-21	2.45183e-19	0.364928	0.272356
1	ANKRD36	9.38126	0.399542	6.5187e-21	3.3107e-19	0.486087	0.399233
1	SLC35G2	9.37901	0.798615	6.6593e-21	3.37472e-19	0.238841	0.142379
1	RBM25	9.37458	0.283614	6.94536e-21	3.51202e-19	0.711594	0.634546
1	NCOA4	9.34418	0.567491	9.26009e-21	4.67232e-19	0.335942	0.242357
1	ACY3	9.31983	1.11396	1.1653e-20	5.86523e-19	0.184638	0.0888816
1	RCBTB2	9.31963	0.363352	1.16749e-20	5.86523e-19	0.549275	0.459775
1	CNPY3	9.31103	0.426675	1.26603e-20	6.3329e-19	0.432754	0.340242
1	AXL	9.2982	0.333424	1.42845e-20	7.12999e-19	0.584348	0.492221
1	RCOR3	9.25275	0.348694	2.18787e-20	1.08044e-18	0.550435	0.465133
1	HLA-DMB	9.21445	0.403873	3.12879e-20	1.53529e-18	0.456522	0.365726
1	SALL1	9.11181	0.548818	8.10155e-20	3.90929e-18	0.32	0.225305
1	ZDHHC14	9.09647	0.281491	9.33114e-20	4.49327e-18	0.74	0.686793
1	RECK	9.07806	0.364059	1.10532e-19	5.27869e-18	0.529855	0.444816
1	MTUS1	9.05885	0.319546	1.31833e-19	6.28305e-18	0.631014	0.554341
1	SRSF4	9.03635	0.357981	1.61997e-19	7.67335e-18	0.528406	0.443674
1	CMKLR1	9.02893	0.337642	1.73354e-19	8.19459e-18	0.58058	0.498531
1	PRKCQ	9.01225	1.45663	2.01881e-19	9.48512e-18	0.150145	0.057822
1	SP140	9.00975	0.45505	2.06531e-19	9.68403e-18	0.424348	0.339126
1	KDM5D	8.9979	0.598294	2.30075e-19	1.07662e-17	0.293043	0.199603
1	YTHDC2	8.98978	0.287542	2.47721e-19	1.15686e-17	0.673623	0.6021
1	HGSNAT	8.94557	0.470086	3.70033e-19	1.71769e-17	0.401159	0.318076
1	SAMHD1	8.9316	0.273659	4.19907e-19	1.94532e-17	0.692464	0.621736
1	C11ORF65	8.92942	0.677487	4.28232e-19	1.97993e-17	0.270725	0.181299
1	MDM4	8.92605	0.285241	4.41491e-19	2.03718e-17	0.668986	0.59239
1	NCOA5	8.92147	0.457035	4.60153e-19	2.11908e-17	0.391884	0.300451
1	ADAP2	8.90799	0.29668	5.1967e-19	2.3837e-17	0.634493	0.549554
1	SRSF2	8.90404	0.447749	5.38483e-19	2.46513e-17	0.389565	0.298248
1	LILRB4	8.85571	0.41673	8.31505e-19	3.78416e-17	0.409855	0.319571
1	RAB11A	8.84362	0.363044	9.26675e-19	4.20081e-17	0.498551	0.413947
1	RP11-382A20.3	8.84064	0.75784	9.51756e-19	4.29771e-17	0.24058	0.150783
1	GARNL3	8.808	0.372902	1.27402e-18	5.71953e-17	0.506377	0.425315
1	NXN	8.78543	0.450784	1.55772e-18	6.97967e-17	0.397681	0.311113
1	FAM212B	8.77437	0.647295	1.71859e-18	7.68563e-17	0.272174	0.183393
1	PPP1R10	8.76774	0.410574	1.82287e-18	8.1207e-17	0.412174	0.321611
1	CRLF3	8.75521	0.318073	2.03717e-18	9.05693e-17	0.572464	0.488278
1	HLA-DQA1	8.74489	0.785055	2.23227e-18	9.85002e-17	0.231884	0.14344
1	DHRS9	8.71783	0.735207	2.83581e-18	1.24422e-16	0.242609	0.154047
1	DPH6	8.71336	0.499121	2.94986e-18	1.28696e-16	0.386377	0.303062
1	HEATR5B	8.71035	0.270041	3.02948e-18	1.31922e-16	0.693043	0.626741
1	CC2D2B	8.70371	0.670888	3.2122e-18	1.39616e-16	0.266667	0.178008
1	HAVCR2	8.62878	0.286329	6.20124e-18	2.68028e-16	0.633043	0.555673
1	TAL1	8.62077	0.308049	6.65052e-18	2.86912e-16	0.562609	0.475821
1	CXCL12	8.60979	0.754429	7.3195e-18	3.14603e-16	0.224348	0.134546
1	SPATA5	8.59996	0.302199	7.9745e-18	3.41491e-16	0.643188	0.563425
1	SECISBP2	8.53774	0.330389	1.36873e-17	5.77602e-16	0.525797	0.441444
1	CD226	8.532	0.458047	1.43845e-17	6.05922e-16	0.382609	0.296317
1	RFX3-AS1	8.51585	0.601501	1.65365e-17	6.94055e-16	0.287536	0.201316
1	PDE9A	8.51134	0.426823	1.71938e-17	7.19041e-16	0.38058	0.292483
1	DEPTOR	8.50339	0.37179	1.84135e-17	7.68663e-16	0.473913	0.389823
1	SELPLG	8.49979	0.429161	1.89927e-17	7.90003e-16	0.381449	0.295556
1	CD4	8.49058	0.354347	2.05601e-17	8.50622e-16	0.483768	0.398553
1	CENPC	8.46517	0.400437	2.55778e-17	1.05259e-15	0.411304	0.324249
1	MARCKS	8.46414	0.346464	2.58051e-17	1.06006e-15	0.497681	0.416993
1	GUCY1A3	8.46069	0.511918	2.658e-17	1.08768e-15	0.344058	0.259764
1	SPG7	8.46052	0.368548	2.66179e-17	1.08768e-15	0.452754	0.36646
1	ZMAT1	8.4573	0.386544	2.73643e-17	1.11425e-15	0.442319	0.358899
1	TRAF3IP3	8.45484	0.355078	2.79467e-17	1.13201e-15	0.493623	0.412369
1	EML1	8.44679	0.397332	2.99412e-17	1.21069e-15	0.421159	0.331266
1	FGF20	8.43041	0.578342	3.44449e-17	1.38316e-15	0.284638	0.197808
1	MGST2	8.42625	0.329129	3.56928e-17	1.42833e-15	0.537101	0.458415
1	ELK3	8.40645	0.341604	4.22608e-17	1.68535e-15	0.511884	0.431435
1	ZNF846	8.40583	0.276668	4.24857e-17	1.69141e-15	0.667826	0.587304
1	GAPVD1	8.37629	0.293188	5.46221e-17	2.16714e-15	0.584058	0.501496
1	REV1	8.35691	0.325875	6.43831e-17	2.55006e-15	0.551304	0.479221
1	HMGN3	8.34576	0.435037	7.07548e-17	2.79765e-15	0.368116	0.281549
1	TNFAIP2	8.3111	0.552664	9.48187e-17	3.73007e-15	0.275652	0.187799
1	GLTSCR1L	8.29193	0.279991	1.11421e-16	4.36838e-15	0.628406	0.550071
1	ZNF652	8.28769	0.257255	1.15466e-16	4.51935e-15	0.703478	0.632697
1	PIP5K1B	8.27864	0.327736	1.2459e-16	4.86007e-15	0.504058	0.414056
1	CACUL1	8.26132	0.304506	1.44074e-16	5.60127e-15	0.575652	0.502421
1	MCCC1	8.25509	0.346012	1.51787e-16	5.89125e-15	0.485507	0.407991
1	CHD6	8.2347	0.287586	1.8e-16	6.963e-15	0.630435	0.564431
1	GPD1L	8.22214	0.832863	1.99902e-16	7.69441e-15	0.202609	0.118228
1	SRSF7	8.20848	0.355068	2.24007e-16	8.59371e-15	0.449565	0.364475
1	CCDC92	8.19034	0.520659	2.6049e-16	9.97686e-15	0.317681	0.235395
1	RP11-563J2.2	8.18792	0.554719	2.65782e-16	1.01628e-14	0.287826	0.203383
1	CLCN5	8.1873	0.386285	2.67155e-16	1.01985e-14	0.429275	0.346742
1	BOD1L1	8.18568	0.252783	2.70775e-16	1.03197e-14	0.668986	0.600713
1	ABHD12	8.15592	0.281883	3.46535e-16	1.31638e-14	0.626377	0.553552
1	LINC01374	8.15357	0.723812	3.53331e-16	1.34e-14	0.224348	0.140475
1	SLC38A9	8.13824	0.330474	4.01049e-16	1.51849e-14	0.52087	0.443592
1	PHTF2	8.11999	0.34617	4.66224e-16	1.75952e-14	0.471304	0.386505
1	NAA25	8.08499	0.327211	6.21686e-16	2.32731e-14	0.496812	0.415144
1	TUBGCP3	8.0489	0.327516	8.35417e-16	3.10241e-14	0.503768	0.424935
1	DAGLB	8.03958	0.276954	9.01478e-16	3.33705e-14	0.555942	0.465486
1	PLEKHO1	7.96704	0.336584	1.62516e-15	5.94951e-14	0.469855	0.390448
1	TCF7L2	7.93616	0.319615	2.08536e-15	7.61024e-14	0.531884	0.458333
1	SNX24	7.916	0.324783	2.4528e-15	8.89523e-14	0.515362	0.439295
1	LST1	7.91448	0.382146	2.48295e-15	8.99051e-14	0.388986	0.305129
1	HECTD2	7.89581	0.288848	2.88438e-15	1.04116e-13	0.595072	0.51553
1	DNAJC10	7.87862	0.345569	3.31011e-15	1.19297e-13	0.451014	0.370485
1	PTS	7.86271	0.66564	3.759e-15	1.35056e-13	0.227246	0.145561
1	ESRRB	7.84678	0.887684	4.26849e-15	1.52653e-13	0.191304	0.111836
1	SUMF1	7.84245	0.252872	4.41832e-15	1.57768e-13	0.73913	0.700936
1	ANXA4	7.83605	0.313492	4.64927e-15	1.65505e-13	0.506087	0.426675
1	RNF166	7.83127	0.391617	4.82947e-15	1.71395e-13	0.383768	0.303634
1	LINC00854	7.82433	0.54874	5.10375e-15	1.80852e-13	0.278551	0.19944
1	GSAP	7.81504	0.267322	5.49441e-15	1.94102e-13	0.644638	0.576017
1	RP5-1031D4.2	7.81362	0.457577	5.55664e-15	1.96002e-13	0.298261	0.213365
1	STK10	7.80354	0.258261	6.0195e-15	2.12007e-13	0.63942	0.566797
1	PLCB2	7.77547	0.293024	7.51672e-15	2.63938e-13	0.527246	0.445088
1	CST3	7.76495	0.393944	8.16759e-15	2.86359e-13	0.372754	0.292809
1	CCDC146	7.76187	0.361462	8.36869e-15	2.92967e-13	0.433623	0.354031
1	ERCC1	7.72925	0.466397	1.08183e-14	3.76452e-13	0.309565	0.229085
1	ARHGEF9	7.68842	0.50255	1.48963e-14	5.14498e-13	0.307536	0.23088
1	TLR10	7.68409	0.411159	1.54088e-14	5.31411e-13	0.354203	0.273689
1	ANKRD44	7.673	0.376276	1.68019e-14	5.77735e-13	0.390725	0.311575
1	CCAR1	7.64497	0.282422	2.08998e-14	7.1441e-13	0.545797	0.466465
1	RBMS2	7.63538	0.48302	2.25153e-14	7.67371e-13	0.305217	0.226338
1	CEP68	7.60438	0.630532	2.86268e-14	9.68554e-13	0.237101	0.159296
1	SOGA1	7.59641	0.354939	3.0446e-14	1.02711e-12	0.415072	0.338746
1	SCO1	7.58939	0.684891	3.21415e-14	1.08274e-12	0.218551	0.140747
1	MED14	7.58437	0.336673	3.34118e-14	1.12227e-12	0.453043	0.378155
1	TCHP	7.57269	0.45577	3.6557e-14	1.22437e-12	0.322029	0.24554
1	OAS1	7.56423	0.629537	3.90164e-14	1.30298e-12	0.232754	0.154673
1	SERPINB9P1	7.56039	0.554843	4.01868e-14	1.34014e-12	0.261159	0.183393
1	GCNT2	7.52059	0.294245	5.45313e-14	1.80552e-12	0.555942	0.48768
1	CYP27A1	7.50425	0.481825	6.17795e-14	2.03969e-12	0.292464	0.214235
1	CAMSAP1	7.48256	0.343092	7.28885e-14	2.39963e-12	0.422609	0.345763
1	PRKCD	7.48182	0.305498	7.33028e-14	2.40985e-12	0.481449	0.404401
1	CCDC53	7.4797	0.413899	7.44899e-14	2.44542e-12	0.357101	0.281386
1	CTNND1	7.46817	0.276487	8.13146e-14	2.65818e-12	0.551014	0.475522
1	TPCN1	7.43016	0.316796	1.08464e-13	3.52585e-12	0.457101	0.37976
1	CTD-2341M24.1	7.38252	0.393626	1.55316e-13	5.02773e-12	0.36	0.28076
1	CYSLTR1	7.36499	0.562204	1.77161e-13	5.71892e-12	0.249275	0.173167
1	SLC22A23	7.30379	0.37284	2.79779e-13	8.94445e-12	0.341739	0.26213
1	PNN	7.3013	0.29538	2.8501e-13	9.09915e-12	0.462029	0.38335
1	ZNF641	7.2886	0.565775	3.132e-13	9.9717e-12	0.254203	0.180619
1	FILIP1L	7.25522	0.478056	4.01013e-13	1.26805e-11	0.306667	0.234878
1	TMEM168	7.25381	0.321373	4.05194e-13	1.27953e-11	0.448406	0.376387
1	MNAT1	7.22932	0.314643	4.8541e-13	1.51634e-11	0.48029	0.410357
1	CECR1	7.2285	0.485239	4.88341e-13	1.52344e-11	0.281449	0.207028
1	COA1	7.2147	0.273461	5.40538e-13	1.68175e-11	0.55971	0.487054
1	NDUFA10	7.21019	0.315309	5.58749e-13	1.73609e-11	0.441449	0.367684
1	BIN2	7.20973	0.264387	5.60643e-13	1.73964e-11	0.526667	0.444979
1	RP3-522D1.1	7.20794	0.477213	5.6805e-13	1.76027e-11	0.30087	0.229711
1	C12ORF76	7.20544	0.486138	5.78574e-13	1.79049e-11	0.288116	0.215323
1	RP11-756G20.1	7.20363	0.380019	5.86309e-13	1.81201e-11	0.390435	0.320414
1	TCERG1	7.20162	0.271001	5.95028e-13	1.83408e-11	0.542899	0.471198
1	HMGN1	7.20014	0.364273	6.01499e-13	1.85156e-11	0.387536	0.315465
1	ABCB4	7.19104	1.0119	6.43005e-13	1.97671e-11	0.151304	0.0773227
1	ZNF812P	7.19058	0.777973	6.45158e-13	1.9807e-11	0.184928	0.110803
1	AC026188.1	7.16792	0.757357	7.61447e-13	2.33463e-11	0.205797	0.133948
1	WNT2B	7.14459	0.297541	9.02657e-13	2.75304e-11	0.455652	0.379624
1	AC003090.1	7.14308	0.49513	9.12607e-13	2.77974e-11	0.288696	0.217744
1	SMG6	7.13123	0.29578	9.94739e-13	3.02197e-11	0.491884	0.421209
1	LIPC	7.1103	0.499527	1.15789e-12	3.50387e-11	0.287536	0.217281
1	SACM1L	7.10263	0.282007	1.22408e-12	3.69932e-11	0.508406	0.442423
1	MTMR10	7.10081	0.258785	1.2403e-12	3.73861e-11	0.564058	0.495077
1	INO80	7.09785	0.297999	1.26717e-12	3.81466e-11	0.473333	0.402578
1	NAV1	7.09706	0.494186	1.27441e-12	3.83149e-11	0.282609	0.210727
1	WDFY4.1	7.09161	0.328	1.3256e-12	3.97509e-11	0.416812	0.342635
1	RP11-231C18.3	7.07891	0.600089	1.45291e-12	4.35122e-11	0.234783	0.163294
1	ORMDL1	7.07376	0.373777	1.50793e-12	4.51019e-11	0.365217	0.295066
1	TLR4	7.06164	0.398772	1.64547e-12	4.90892e-11	0.334783	0.262375
1	KIF26B	7.03258	0.307052	2.02756e-12	6.03329e-11	0.464928	0.390829
1	SCLT1	6.99069	0.263596	2.73531e-12	8.03628e-11	0.595072	0.539844
1	CASP10	6.98364	0.361895	2.87632e-12	8.43987e-11	0.362899	0.290388
1	FPR3	6.97998	0.674888	2.95215e-12	8.65143e-11	0.196522	0.124021
1	STK32B	6.97361	0.316512	3.0891e-12	9.04137e-11	0.449855	0.379216
1	SLC35G4	6.96681	0.427119	3.24201e-12	9.47695e-11	0.302899	0.230309
1	UTP6	6.95696	0.363012	3.47691e-12	1.01508e-10	0.366667	0.295855
1	RAB30-AS1	6.93948	0.411954	3.93549e-12	1.14321e-10	0.331304	0.262049
1	KBTBD12	6.9132	0.311087	4.73828e-12	1.36615e-10	0.455072	0.384329
1	GGNBP2	6.88432	0.263031	5.8065e-12	1.66793e-10	0.533913	0.467336
1	OSGEP	6.87535	0.51548	6.18365e-12	1.77407e-10	0.250145	0.17896
1	CASS4	6.87482	0.416601	6.20671e-12	1.77849e-10	0.315652	0.246655
1	UPF3A	6.87456	0.379951	6.21824e-12	1.7796e-10	0.330435	0.258758
1	BROX	6.86624	0.348353	6.59175e-12	1.88417e-10	0.390725	0.323896
1	CD276	6.85969	0.439815	6.90091e-12	1.97011e-10	0.296522	0.225985
1	DUSP22	6.8447	0.331196	7.66356e-12	2.17979e-10	0.411304	0.343641
1	PRPF40B	6.81426	0.487451	9.47474e-12	2.68181e-10	0.265507	0.195659
1	RNF115	6.79143	0.291265	1.11025e-11	3.11596e-10	0.477391	0.413648
1	MPEG1	6.78449	0.959726	1.16499e-11	3.26169e-10	0.147826	0.078057
1	CABLES1	6.78079	0.36259	1.19524e-11	3.34235e-10	0.355942	0.286282
1	CD99	6.75149	0.336211	1.46338e-11	4.07254e-10	0.377681	0.307958
1	DNM3	6.74862	0.407592	1.49262e-11	4.14893e-10	0.352754	0.289654
1	RTCB	6.73905	0.365547	1.59424e-11	4.41563e-10	0.338551	0.267787
1	ANKMY1	6.71801	0.297592	1.84223e-11	5.08421e-10	0.456812	0.395589
1	HMG20A	6.71474	0.359523	1.88398e-11	5.18708e-10	0.365507	0.298874
1	SFT2D2	6.70342	0.293768	2.03594e-11	5.579e-10	0.449275	0.383322
1	XAF1	6.69783	0.281026	2.11536e-11	5.7898e-10	0.48	0.413403
1	HIPK2	6.68437	0.253799	2.31928e-11	6.333e-10	0.555072	0.48768
1	PECAM1	6.66503	0.289996	2.64616e-11	7.17494e-10	0.445217	0.377557
1	CTC-542B22.2	6.6565	0.885951	2.80428e-11	7.58594e-10	0.153333	0.0847476
1	ERAP1	6.63849	0.371166	3.16911e-11	8.53306e-10	0.34	0.271676
1	RP11-552D4.1	6.63737	0.415381	3.19325e-11	8.5881e-10	0.293623	0.224597
1	ANGEL2	6.63557	0.405532	3.23247e-11	8.68353e-10	0.312464	0.245213
1	PFKFB2	6.59231	0.616318	4.33029e-11	1.15127e-09	0.215652	0.148961
1	TRIM13	6.58588	0.365496	4.52206e-11	1.19814e-09	0.338551	0.269936
1	SRRM1	6.56629	0.259676	5.15849e-11	1.35901e-09	0.514493	0.450364
1	SESN3	6.56324	0.257308	5.26523e-11	1.38399e-09	0.53942	0.478405
1	SLF2	6.55988	0.271534	5.38517e-11	1.41231e-09	0.474203	0.406712
1	NCKAP5L	6.5467	0.383587	5.88225e-11	1.53574e-09	0.314783	0.246927
1	AHCYL1	6.5084	0.35478	7.59546e-11	1.97154e-09	0.353043	0.28707
1	TG	6.5028	0.487372	7.88386e-11	2.03996e-09	0.25942	0.194191
1	RCC2	6.50025	0.271235	8.01853e-11	2.0725e-09	0.470145	0.404618
1	DBNL	6.49711	0.426933	8.18763e-11	2.11385e-09	0.28087	0.213854
1	RP11-323I15.5	6.46665	0.936866	1.00201e-10	2.56696e-09	0.146377	0.08026
1	SMIM14	6.44815	0.358137	1.13221e-10	2.89093e-09	0.328696	0.260009
1	HPGDS	6.43811	0.269195	1.2097e-10	3.07864e-09	0.437391	0.365943
1	PARD3B	6.42886	0.441257	1.28561e-10	3.25398e-09	0.275072	0.208469
1	TARBP1	6.41797	0.457973	1.38104e-10	3.49172e-09	0.248116	0.180238
1	RAP2A	6.40924	0.288981	1.46252e-10	3.69369e-09	0.432464	0.368065
1	PIGN	6.40665	0.290406	1.48749e-10	3.75268e-09	0.46029	0.400076
1	TM7SF3	6.39939	0.292907	1.56003e-10	3.92288e-09	0.418841	0.353704
1	MNDA	6.39844	0.359888	1.56968e-10	3.94289e-09	0.315942	0.247851
1	ITPKB	6.39635	0.258468	1.59132e-10	3.98861e-09	0.493333	0.426485
1	IFI44	6.39419	0.385755	1.61405e-10	4.03252e-09	0.30087	0.232974
1	CREBL2	6.394	0.26308	1.616e-10	4.03304e-09	0.481159	0.41838
1	EXT1	6.37022	0.355559	1.88753e-10	4.69052e-09	0.377391	0.314322
1	FGL2	6.36937	0.279475	1.89807e-10	4.71167e-09	0.404348	0.334367
1	TK2	6.36805	0.635236	1.91442e-10	4.74719e-09	0.192754	0.127393
1	CD46	6.36358	0.296468	1.97103e-10	4.88234e-09	0.403478	0.336733
1	IFI44L	6.34899	0.324464	2.16739e-10	5.35162e-09	0.344928	0.27766
1	THUMPD2	6.33215	0.323368	2.41763e-10	5.93789e-09	0.369275	0.302926
1	C20ORF197	6.30917	0.531996	2.80541e-10	6.86129e-09	0.221449	0.156332
1	KDM3B	6.29561	0.250981	3.06199e-10	7.47306e-09	0.505797	0.442423
1	TRIM66	6.26589	0.620685	3.70711e-10	9.00963e-09	0.195362	0.131038
1	RP5-857K21.4	6.26203	0.359918	3.80009e-10	9.22596e-09	0.327826	0.263354
1	C12ORF42	6.26079	0.861564	3.83044e-10	9.28991e-09	0.149275	0.0849924
1	BCO2	6.22506	0.313429	4.81383e-10	1.15303e-08	0.35971	0.29455
1	ATP8B1	6.22423	0.451908	4.83923e-10	1.15792e-08	0.26029	0.196366
1	CATSPER2	6.21781	0.36082	5.04135e-10	1.20504e-08	0.324638	0.261097
1	NLRP3	6.19	0.346668	6.01649e-10	1.4337e-08	0.324348	0.259274
1	CEP63	6.1174	0.301319	9.51154e-10	2.23897e-08	0.391594	0.329743
1	TNFRSF11A	6.11676	0.710596	9.54986e-10	2.24572e-08	0.170725	0.108056
1	ARHGAP4	6.10345	0.393759	1.03804e-09	2.43609e-08	0.286087	0.223156
1	CREBZF	6.0967	0.410355	1.08278e-09	2.53853e-08	0.269855	0.206348
1	TAF11	6.0659	0.480032	1.3122e-09	3.06401e-08	0.238841	0.177056
1	HLA-DRB5	6.05809	0.429939	1.37747e-09	3.20031e-08	0.264928	0.204063
1	FCGRT	6.03691	0.265037	1.57089e-09	3.62789e-08	0.409565	0.343043
1	FAM227B	6.02475	0.666204	1.69376e-09	3.89614e-08	0.175652	0.113795
1	LMO7	6.01995	0.305839	1.74476e-09	4.00949e-08	0.398261	0.339888
1	FAM111A	6.00618	0.359904	1.89941e-09	4.35625e-08	0.308406	0.247579
1	KLHDC1	6.00161	0.377575	1.95376e-09	4.46767e-08	0.308696	0.249782
1	LRIG1	5.99423	0.37768	2.04446e-09	4.6613e-08	0.317101	0.257942
1	TLR3	5.98437	0.583604	2.17227e-09	4.91887e-08	0.191884	0.130004
1	DDI2	5.91367	0.290429	3.34567e-09	7.43804e-08	0.376812	0.315193
1	MRE11A	5.90507	0.350827	3.52493e-09	7.81411e-08	0.325217	0.265747
1	KLHL18	5.89274	0.259137	3.79834e-09	8.39615e-08	0.435942	0.375598
1	RPS4Y1	5.87826	0.498851	4.14607e-09	9.12135e-08	0.22087	0.16052
1	C10ORF128	5.84775	0.299593	4.98266e-09	1.08794e-07	0.348696	0.285438
1	ATG14	5.83392	0.448105	5.41407e-09	1.1788e-07	0.247536	0.188452
1	ZC3H6	5.83084	0.319637	5.51506e-09	1.19967e-07	0.361449	0.303525
1	ZNF326	5.82198	0.284123	5.81537e-09	1.26263e-07	0.391594	0.331239
1	DDX42	5.81705	0.294023	5.98963e-09	1.29803e-07	0.371304	0.312364
1	NIPAL2	5.7979	0.493369	6.71514e-09	1.44581e-07	0.227826	0.169006
1	STEAP1B	5.78967	0.298548	7.05244e-09	1.51282e-07	0.342029	0.280815
1	NHLRC3	5.78806	0.345291	7.12024e-09	1.52595e-07	0.303768	0.244125
1	WNT5A	5.77359	0.266593	7.75981e-09	1.64781e-07	0.410725	0.350685
1	SNX19	5.75281	0.296657	8.7772e-09	1.85705e-07	0.374493	0.317368
1	GIMAP8	5.7374	0.26888	9.61423e-09	2.02676e-07	0.381449	0.319408
1	OCLN	5.7297	1.0631	1.00609e-08	2.119e-07	0.117101	0.0583388
1	KLHDC4	5.70112	0.450006	1.1902e-08	2.49545e-07	0.226377	0.166857
1	ZNF75D	5.6909	0.370978	1.26368e-08	2.64235e-07	0.306957	0.251605
1	HELQ	5.68621	0.411066	1.29888e-08	2.71107e-07	0.255942	0.197645
1	PAOX	5.68135	0.765218	1.33633e-08	2.78422e-07	0.152754	0.0948923
1	RNF141	5.67011	0.522722	1.42705e-08	2.97056e-07	0.208986	0.151545
1	PPARGC1B	5.66178	0.286799	1.49813e-08	3.11295e-07	0.371014	0.312636
1	DHRS12	5.65925	0.798184	1.52033e-08	3.15316e-07	0.14058	0.0822726
1	ZFY	5.65283	0.525232	1.57829e-08	3.25619e-07	0.212754	0.155706
1	GPATCH2	5.64869	0.279315	1.61674e-08	3.32959e-07	0.415362	0.362516
1	ACPP	5.64847	0.473692	1.61878e-08	3.33084e-07	0.228406	0.170991
1	EXOC3	5.64117	0.324586	1.68897e-08	3.46911e-07	0.310725	0.251985
1	TMEM106A	5.63634	0.272371	1.73702e-08	3.5615e-07	0.372754	0.314105
1	FRRS1	5.62388	0.419806	1.86711e-08	3.80805e-07	0.23942	0.180592
1	ZNF362	5.6061	0.285206	2.06932e-08	4.20937e-07	0.349855	0.290307
1	PSMA3	5.5961	0.406437	2.19231e-08	4.44785e-07	0.256812	0.199521
1	ZNF595	5.59338	0.358154	2.22691e-08	4.51016e-07	0.296232	0.239692
1	C16ORF70	5.58081	0.344438	2.394e-08	4.82753e-07	0.285507	0.226746
1	NFYC	5.58036	0.265238	2.40015e-08	4.83573e-07	0.408116	0.354058
1	UBA7	5.57963	0.514851	2.41026e-08	4.85188e-07	0.195652	0.13762
1	NABP1	5.57046	0.252761	2.54075e-08	5.11011e-07	0.427826	0.369261
1	FAM192A	5.56873	0.284274	2.56604e-08	5.15652e-07	0.363768	0.305619
1	IVD	5.56368	0.255559	2.64147e-08	5.30351e-07	0.393623	0.334258
1	RP11-346C20.3	5.55849	0.540308	2.72116e-08	5.44936e-07	0.194203	0.137348
1	PARL	5.55833	0.252065	2.72369e-08	5.44973e-07	0.411304	0.353596
1	NAGK	5.55623	0.259488	2.75665e-08	5.50619e-07	0.390145	0.331103
1	PTH2R	5.52674	0.951621	3.26231e-08	6.47718e-07	0.128406	0.0721551
1	VEZT	5.5197	0.26311	3.39576e-08	6.73062e-07	0.398841	0.342091
1	BDH1	5.44291	0.684711	5.24161e-08	1.02665e-06	0.150145	0.0938316
1	SCRN1	5.44189	0.317766	5.2719e-08	1.03171e-06	0.322319	0.266944
1	CCDC102B	5.43914	0.508074	5.35387e-08	1.04599e-06	0.213043	0.157855
1	ZNF100	5.39089	0.257201	7.0109e-08	1.35603e-06	0.37913	0.321475
1	RP11-584P21.2	5.38626	0.599127	7.19371e-08	1.38791e-06	0.176232	0.121356
1	OAZ2	5.38369	0.429905	7.29747e-08	1.40676e-06	0.232174	0.177355
1	SCML1	5.38166	0.526697	7.38016e-08	1.42152e-06	0.193623	0.138327
1	ORC2	5.37116	0.305877	7.82317e-08	1.5056e-06	0.324058	0.268494
1	RPRD1A	5.35258	0.257766	8.67102e-08	1.66601e-06	0.39971	0.345926
1	MFSD14B	5.35153	0.305997	8.72159e-08	1.67434e-06	0.330725	0.278013
1	UQCC1	5.3263	0.263076	1.00235e-07	1.91793e-06	0.385507	0.333442
1	FADS2	5.32032	0.691469	1.03585e-07	1.97551e-06	0.151014	0.0964154
1	TMEM241	5.31605	0.358619	1.06043e-07	2.01743e-06	0.27942	0.224706
1	PRCP	5.31314	0.409929	1.07754e-07	2.04748e-06	0.247246	0.193619
1	ZKSCAN1	5.30015	0.251679	1.15708e-07	2.18695e-06	0.389565	0.336271
1	CDC37	5.29881	0.4153	1.1656e-07	2.20126e-06	0.222319	0.166667
1	CCDC84	5.29309	0.316884	1.2027e-07	2.26764e-06	0.307246	0.252965
1	AC008074.1	5.28696	0.734971	1.24362e-07	2.3391e-06	0.142899	0.0888816
1	NUBPL	5.27753	0.255657	1.30937e-07	2.45282e-06	0.408406	0.355336
1	DDX59	5.27444	0.505975	1.33164e-07	2.49231e-06	0.19913	0.145507
1	ADRB2	5.25706	0.517821	1.46374e-07	2.72878e-06	0.185217	0.130766
1	CD3EAP	5.24852	0.970523	1.5333e-07	2.85159e-06	0.112754	0.0587739
1	APIP	5.24513	0.412703	1.56169e-07	2.89975e-06	0.241449	0.18818
1	ADGRB3	5.22666	0.342812	1.72596e-07	3.18439e-06	0.287246	0.234062
1	ZNF490	5.22279	0.320185	1.76246e-07	3.24657e-06	0.288986	0.234008
1	LRIG2	5.22164	0.289396	1.77342e-07	3.26416e-06	0.330725	0.277034
1	XPA	5.2141	0.308869	1.84707e-07	3.39166e-06	0.311014	0.257697
1	C1ORF162	5.19413	0.257937	2.05677e-07	3.749e-06	0.318551	0.259682
1	DENR	5.18382	0.301514	2.17386e-07	3.94649e-06	0.314493	0.261341
1	C20ORF196	5.17648	0.300003	2.26117e-07	4.09374e-06	0.31971	0.266427
1	CCDC14	5.1745	0.308821	2.28523e-07	4.13225e-06	0.295072	0.239828
1	DCLRE1C	5.17183	0.265559	2.31815e-07	4.18384e-06	0.357971	0.304096
1	AKAP17A	5.16005	0.495846	2.46886e-07	4.44204e-06	0.188986	0.135689
1	AC016831.7	5.15842	0.442382	2.4904e-07	4.47386e-06	0.224348	0.172732
1	PRPSAP1	5.15172	0.305772	2.58107e-07	4.62599e-06	0.315362	0.263844
1	SLC7A6OS	5.13347	0.357947	2.84445e-07	5.05511e-06	0.258841	0.205994
1	TMEM173	5.13227	0.742431	2.86267e-07	5.08359e-06	0.134203	0.0814023
1	NCBP3	5.12819	0.315907	2.92544e-07	5.19108e-06	0.289565	0.236238
1	C18ORF8	5.12758	0.41106	2.93486e-07	5.20383e-06	0.233913	0.18187
1	BRD7	5.0776	0.279671	3.82242e-07	6.72091e-06	0.34029	0.288648
1	RBM4	5.07681	0.546363	3.83834e-07	6.73478e-06	0.173333	0.121111
1	CYTL1	5.06101	0.505337	4.17043e-07	7.2724e-06	0.186667	0.134601
1	CMC2	5.05385	0.4422	4.32986e-07	7.53909e-06	0.202319	0.149532
1	CCDC136	5.042	0.588593	4.60689e-07	7.99147e-06	0.156812	0.104411
1	IRF5	5.0299	0.358621	4.90734e-07	8.48097e-06	0.263768	0.213555
1	CRHR1	5.01654	0.85913	5.26103e-07	9.05179e-06	0.117391	0.0657909
1	CDK9	5.00976	0.536037	5.44991e-07	9.36288e-06	0.168696	0.116732
1	AGO1	5.00801	0.33293	5.49962e-07	9.44128e-06	0.278551	0.227508
1	LINC01468	5.00283	1.04171	5.64953e-07	9.67002e-06	0.104348	0.0531712
1	ZNF789	4.98191	0.417478	6.29593e-07	1.07132e-05	0.213333	0.16169
1	P2RY6	4.97917	0.419745	6.38588e-07	1.08583e-05	0.215362	0.163947
1	SLC4A8	4.97689	0.353946	6.46147e-07	1.09788e-05	0.264058	0.213446
1	FAM228B	4.97553	0.283629	6.50687e-07	1.10479e-05	0.311594	0.259465
1	ANGEL1	4.97402	0.280267	6.55799e-07	1.11184e-05	0.323478	0.272139
1	RP11-156P1.2	4.96819	0.70397	6.75795e-07	1.14407e-05	0.133623	0.0822726
1	C7ORF49	4.96233	0.403789	6.96543e-07	1.17662e-05	0.235362	0.186113
1	AKAP7	4.94964	0.260911	7.43521e-07	1.25052e-05	0.36087	0.309835
1	RNF146	4.93842	0.316072	7.87563e-07	1.31886e-05	0.28058	0.229738
1	PCBD2	4.93599	0.336983	7.97444e-07	1.33261e-05	0.266667	0.21516
1	WBP2NL	4.93598	0.34976	7.97501e-07	1.33261e-05	0.244928	0.19313
1	DEXI	4.92901	0.437354	8.26464e-07	1.37409e-05	0.202029	0.151001
1	RPE	4.92578	0.276157	8.40255e-07	1.39302e-05	0.334203	0.284432
1	SIN3B	4.91521	0.316875	8.8688e-07	1.46718e-05	0.275362	0.224298
1	MAN2B1	4.9136	0.31732	8.94189e-07	1.47716e-05	0.271014	0.219811
1	TTYH2	4.91101	0.384917	9.0607e-07	1.49572e-05	0.228986	0.178552
1	AKR1A1	4.89508	0.288303	9.82647e-07	1.61145e-05	0.308116	0.257099
1	IQCH-AS1	4.89499	0.358622	9.83114e-07	1.61145e-05	0.244928	0.193973
1	MGME1	4.89444	0.420545	9.85855e-07	1.6148e-05	0.208116	0.157392
1	ZC2HC1A	4.88499	0.463151	1.03435e-06	1.69303e-05	0.195072	0.145126
1	TMED10	4.87941	0.276265	1.06402e-06	1.73549e-05	0.321739	0.271867
1	LRRC37A2	4.87913	0.302949	1.06554e-06	1.73552e-05	0.29942	0.249619
1	ZNF69	4.8517	0.279862	1.22408e-06	1.97297e-05	0.308406	0.258186
1	RP11-120D5.1	4.84938	1.11014	1.23847e-06	1.9934e-05	0.106087	0.0572509
1	PPWD1	4.84421	0.267297	1.27114e-06	2.04153e-05	0.324928	0.275267
1	DLST	4.84195	0.305985	1.28574e-06	2.06091e-05	0.290435	0.241188
1	XRCC6	4.8304	0.351513	1.36259e-06	2.17657e-05	0.250725	0.201072
1	TTC39C	4.81301	0.692487	1.48675e-06	2.36676e-05	0.137391	0.0882017
1	ZRANB3	4.81055	0.322357	1.50515e-06	2.39442e-05	0.267536	0.21652
1	SEPSECS	4.78099	0.49384	1.74436e-06	2.75231e-05	0.186377	0.138
1	CCND2	4.76615	0.289485	1.87779e-06	2.94682e-05	0.29913	0.25049
1	TXNDC15	4.75185	0.448388	2.01559e-06	3.13762e-05	0.197681	0.149342
1	DCAF1	4.69911	0.2894	2.61293e-06	4.0243e-05	0.286087	0.236592
1	ZNF397	4.68022	0.281515	2.8656e-06	4.40176e-05	0.289275	0.239828
1	STEAP3	4.66466	0.323257	3.09126e-06	4.72649e-05	0.258261	0.21021
1	PER2	4.65616	0.847249	3.22157e-06	4.90633e-05	0.109855	0.061956
1	PON2	4.63676	0.358082	3.53919e-06	5.36192e-05	0.227536	0.179613
1	RP11-463D19.1	4.62656	0.64343	3.7178e-06	5.61419e-05	0.135942	0.0883377
1	CIR1	4.61804	0.26867	3.87376e-06	5.83592e-05	0.324638	0.277415
1	EPM2A	4.61799	0.432363	3.87469e-06	5.83592e-05	0.209275	0.162859
1	CLTA	4.60878	0.284831	4.05043e-06	6.08089e-05	0.284638	0.236238
1	MPPE1	4.60576	0.265645	4.10971e-06	6.16589e-05	0.291014	0.241542
1	SUPT6H	4.59066	0.277043	4.41839e-06	6.58644e-05	0.285797	0.237815
1	SNX4	4.57794	0.267418	4.6958e-06	6.98204e-05	0.317101	0.270942
1	TAMM41	4.55756	0.284928	5.17518e-06	7.64583e-05	0.301449	0.255847
1	ZNF862	4.55424	0.256461	5.25756e-06	7.75765e-05	0.315072	0.267352
1	CLK4	4.54612	0.256025	5.46428e-06	8.03204e-05	0.313913	0.267107
1	TMA16	4.53252	0.387691	5.82842e-06	8.53486e-05	0.214493	0.168135
1	KANSL3	4.51649	0.297547	6.28719e-06	9.15469e-05	0.278841	0.232702
1	ZSCAN30	4.51619	0.353699	6.29616e-06	9.162e-05	0.21971	0.172514
1	ACSS1	4.51016	0.278254	6.47797e-06	9.41476e-05	0.283478	0.235748
1	COX18	4.49516	0.601823	6.95169e-06	0.000100592	0.143478	0.0976936
1	MTIF3	4.48215	0.290682	7.38943e-06	0.000106395	0.273333	0.227208
1	GTF2A1	4.46322	0.323691	8.07386e-06	0.000115462	0.266667	0.22234
1	PDHX	4.44679	0.312277	8.71612e-06	0.00012434	0.262319	0.216982
1	MSL3	4.4428	0.275058	8.87955e-06	0.000126438	0.283768	0.236646
1	DGUOK	4.43186	0.328862	9.34236e-06	0.000132703	0.246377	0.201235
1	GPN3	4.42013	0.416103	9.86405e-06	0.000139942	0.188986	0.143168
1	KDM4A	4.41877	0.382175	9.92658e-06	0.000140743	0.214783	0.170311
1	MCCC2	4.41558	0.322655	1.0074e-05	0.000142571	0.251014	0.20594
1	ZNF76	4.40241	0.38168	1.07057e-05	0.000151144	0.208696	0.163403
1	AGK	4.40044	0.267348	1.08031e-05	0.000152425	0.277971	0.231016
1	CUEDC1	4.39996	0.290945	1.08272e-05	0.000152672	0.27971	0.234715
1	AGBL3	4.3952	0.596466	1.1067e-05	0.00015596	0.14087	0.0957626
1	TUBGCP5	4.39139	0.336943	1.1263e-05	0.000158528	0.229275	0.18372
1	CD37	4.38939	0.271035	1.13668e-05	0.000159893	0.276522	0.229738
1	FBXO9	4.38437	0.25179	1.16322e-05	0.000163428	0.315362	0.271323
1	SAP130	4.38	0.334193	1.18681e-05	0.000166642	0.24	0.195578
1	CENPP	4.3764	0.306866	1.20653e-05	0.000169207	0.302029	0.260362
1	HLTF	4.37301	0.286853	1.22547e-05	0.000171758	0.274203	0.228922
1	NME3	4.36489	0.467478	1.27185e-05	0.000177936	0.164058	0.118663
1	TREML1	4.36361	0.468346	1.27936e-05	0.000178879	0.164058	0.118636
1	TRIM73	4.3549	0.467164	1.33129e-05	0.000185693	0.176232	0.132044
1	AC159540.1	4.35134	0.304577	1.35305e-05	0.000188276	0.246957	0.201752
1	MPHOSPH9	4.34632	0.250925	1.38441e-05	0.000192293	0.315362	0.27048
1	UPF3B	4.3437	0.311291	1.40104e-05	0.000194139	0.247246	0.202159
1	RBM3	4.3398	0.372203	1.42612e-05	0.00019726	0.206667	0.161934
1	AHDC1	4.32017	0.289246	1.55908e-05	0.000214246	0.243768	0.197454
1	RP11-554D14.6	4.31152	0.392702	1.62135e-05	0.00022254	0.203188	0.159323
1	TYW1B	4.30265	0.261413	1.68766e-05	0.00023134	0.31913	0.276273
1	FTCDNL1	4.30255	0.289493	1.68845e-05	0.00023134	0.3	0.259356
1	DCK	4.28338	0.39044	1.84076e-05	0.000251466	0.197391	0.153313
1	BTN2A1	4.28053	0.324989	1.8645e-05	0.00025456	0.236522	0.192096
1	LMO1	4.27496	0.569392	1.91175e-05	0.000260398	0.128406	0.0837141
1	AKAP8L	4.27368	0.257531	1.92271e-05	0.000261737	0.290725	0.246056
1	BLCAP	4.26898	0.276957	1.96371e-05	0.000266848	0.273623	0.229765
1	TREM2	4.26546	0.281666	1.99492e-05	0.000270931	0.26058	0.216003
1	ZNF44	4.26217	0.283048	2.02448e-05	0.000274624	0.267536	0.223074
1	RNF34	4.25559	0.336725	2.08499e-05	0.000282337	0.226087	0.182441
1	C11ORF54	4.25287	0.428166	2.11049e-05	0.000285624	0.181449	0.137756
1	APH1B	4.24271	0.35808	2.20837e-05	0.000298523	0.222319	0.180102
1	N4BP2	4.23972	0.279576	2.238e-05	0.000302351	0.284348	0.242113
1	GAL3ST4	4.23953	0.305825	2.23986e-05	0.000302426	0.227826	0.182577
1	INPPL1	4.23397	0.275029	2.29599e-05	0.000309286	0.253333	0.208197
1	ADAT2	4.23191	0.384819	2.31715e-05	0.000311774	0.19913	0.155924
1	EYS	4.22738	0.574468	2.36424e-05	0.000317557	0.134493	0.0908399
1	FBXO22	4.22251	0.271905	2.41594e-05	0.000324127	0.273333	0.229303
1	AL356053.1	4.22152	0.255052	2.42658e-05	0.000325178	0.326087	0.284432
1	STON2	4.21988	0.426684	2.44434e-05	0.000327369	0.184928	0.141781
1	PIGG	4.21113	0.306895	2.54094e-05	0.000339915	0.243188	0.199956
1	ZNF621	4.20574	0.350354	2.60224e-05	0.000346916	0.224928	0.18274
1	TGFBRAP1	4.19271	0.268721	2.75645e-05	0.000366421	0.276522	0.233382
1	BANK1	4.17943	0.84137	2.92236e-05	0.000386705	0.108696	0.0664164
1	DDHD2	4.1675	0.433727	3.07959e-05	0.000406121	0.165507	0.122144
1	MGLL	4.16342	0.289054	3.13517e-05	0.000413216	0.216812	0.172052
1	SUCLA2	4.13693	0.315513	3.51981e-05	0.000459993	0.243768	0.201697
1	VENTX	4.12827	0.631791	3.65506e-05	0.000475526	0.12058	0.0779482
1	MLX	4.10842	0.460901	3.98383e-05	0.000515986	0.167536	0.125734
1	HSPB11	4.10577	0.321735	4.02974e-05	0.000521351	0.23913	0.197971
1	LETMD1	4.10349	0.334447	4.06965e-05	0.00052505	0.217101	0.174772
1	MSH6	4.10163	0.388203	4.10243e-05	0.000528692	0.18058	0.137511
1	NAA40	4.09181	0.318896	4.28019e-05	0.000550074	0.227246	0.185215
1	ERCC3	4.08075	0.325222	4.48915e-05	0.000574067	0.244058	0.204091
1	ZNF330	4.08057	0.272919	4.49246e-05	0.000574174	0.275072	0.23447
1	P2RX1	4.07846	0.554243	4.53341e-05	0.00057877	0.136232	0.094158
1	MCUB	4.07326	0.359596	4.6359e-05	0.000590555	0.211594	0.170502
1	CLEC2B	4.06143	0.340459	4.87731e-05	0.000619608	0.195942	0.153394
1	RGS19	4.05653	0.270409	4.9807e-05	0.00063205	0.273043	0.232349
1	DGKA	4.05579	0.250539	4.99656e-05	0.000633595	0.271014	0.227616
1	SLC9A8	4.0363	0.272939	5.43014e-05	0.000685337	0.270145	0.228895
1	VCL	4.02902	0.253874	5.60109e-05	0.000704996	0.286667	0.244968
1	C19ORF60	4.01932	0.483171	5.83653e-05	0.000731769	0.147826	0.106315
1	SVBP	4.01087	0.61143	6.04944e-05	0.000756099	0.12087	0.0793897
1	DNHD1	4.00907	0.339803	6.09587e-05	0.000761491	0.222899	0.182441
1	DTWD2	4.00741	0.296889	6.13872e-05	0.000765625	0.252464	0.211951
1	KIF21B	3.98033	0.332139	6.88192e-05	0.000852344	0.197681	0.155733
1	RP11-356J5.12	3.96827	0.646497	7.23951e-05	0.000893771	0.116232	0.0753916
1	NUP43	3.96767	0.354917	7.25793e-05	0.000895569	0.190725	0.149369
1	AP000769.1	3.95868	0.260281	7.53653e-05	0.000927481	0.249275	0.207381
1	UEVLD	3.94921	0.282971	7.84089e-05	0.000961876	0.256522	0.216574
1	ADCK1	3.94742	0.337031	7.89984e-05	0.000968085	0.213913	0.173575
1	ACVR2A	3.94649	0.325783	7.93045e-05	0.000971324	0.249275	0.211407
1	MTERF1	3.93422	0.332472	8.34663e-05	0.00101961	0.234783	0.195795
1	NIPSNAP3B	3.92849	0.331953	8.54812e-05	0.00104203	0.203478	0.162478
1	CTNNA3	3.91932	0.396399	8.88005e-05	0.00107965	0.217681	0.179613
1	RPL7L1	3.9177	0.287259	8.93993e-05	0.00108523	0.233333	0.192559
1	RNPEP	3.91686	0.321973	8.97115e-05	0.00108845	0.22087	0.180728
1	ZNF449	3.90825	0.620111	9.2967e-05	0.00112501	0.122899	0.0830614
1	AK9	3.90637	0.306708	9.36913e-05	0.00113318	0.238551	0.199712
1	JAM2	3.87503	0.267948	0.000106609	0.00127612	0.254493	0.214154
1	CARF	3.87259	0.255083	0.000107687	0.00128769	0.266087	0.225223
1	RALGPS1	3.86743	0.286214	0.00010999	0.00131253	0.256522	0.217445
1	CCDC130	3.86706	0.358984	0.000110154	0.00131381	0.189855	0.150131
1	MAP2K6	3.85955	0.522264	0.000113596	0.00135278	0.142319	0.102997
1	FAM216A	3.83394	0.379732	0.000126106	0.00149409	0.167536	0.127257
1	CXORF23	3.83219	0.259819	0.000127009	0.00150402	0.23913	0.197781
1	LINC01572	3.83204	0.576908	0.000127085	0.00150415	0.123768	0.0842309
1	DOK1	3.8302	0.470574	0.000128037	0.00151464	0.142319	0.102589
1	XXYLT1	3.81383	0.286809	0.00013683	0.00161456	0.261159	0.224842
1	GIMAP4	3.81149	0.255308	0.000138132	0.00162826	0.257101	0.216901
1	PPP6C	3.79694	0.290959	0.000146492	0.00172155	0.237971	0.199467
1	CNIH3	3.79666	0.47101	0.000146657	0.00172176	0.163188	0.125626
1	TXNDC16	3.79208	0.304306	0.000149394	0.00175211	0.207536	0.167537
1	PIGX	3.78834	0.321387	0.000151656	0.00177417	0.205217	0.16566
1	TTTY15	3.78792	0.26497	0.000151912	0.00177626	0.234203	0.193647
1	SH3D19	3.78032	0.431005	0.000156627	0.00182313	0.152754	0.11374
1	CPA6	3.77768	0.355247	0.000158298	0.00184074	0.183478	0.144283
1	CCDC112	3.77246	0.272242	0.000161647	0.00187497	0.248116	0.210047
1	ZNF507	3.77224	0.292791	0.000161787	0.00187567	0.236232	0.197971
1	NMD3	3.76296	0.299519	0.000167912	0.0019395	0.236232	0.198624
1	NDUFV1	3.75967	0.341126	0.00017014	0.00196367	0.193043	0.154537
1	LINC00907	3.74879	0.654578	0.000177692	0.00204398	0.105507	0.0666612
1	SARM1	3.74878	0.487956	0.000177694	0.00204398	0.14087	0.102508
1	ZCWPW1	3.72551	0.520041	0.000194917	0.00222311	0.129855	0.0914654
1	AF146191.4	3.71803	0.400801	0.000200783	0.00228084	0.193043	0.15693
1	LRRC4	3.71793	0.467992	0.000200863	0.00228084	0.141739	0.103405
1	SPAG16	3.71302	0.350503	0.000204799	0.00232063	0.212464	0.175315
1	TTC32	3.70978	0.623851	0.000207437	0.0023463	0.112174	0.074059
1	ZNF565	3.7053	0.374895	0.000211144	0.0023859	0.164928	0.126169
1	RMND5B	3.69491	0.485689	0.000219968	0.00247117	0.141159	0.103351
1	ZNF546	3.69103	0.409044	0.00022335	0.00250433	0.173913	0.137049
1	MYRIP	3.69084	0.663935	0.000223513	0.00250494	0.102319	0.0642134
1	GIMAP2	3.68636	0.393561	0.000227488	0.00254458	0.166377	0.128237
1	ZNF780A	3.6726	0.366292	0.000240094	0.0026727	0.182029	0.144745
1	DDX11	3.66421	0.485259	0.000248105	0.00275659	0.131304	0.0932604
1	NKD1	3.65904	0.669173	0.000253158	0.00280736	0.108116	0.0707137
1	ZNF740	3.6474	0.536378	0.000264907	0.00293065	0.118551	0.0806136
1	TMEM62	3.64404	0.255828	0.000268394	0.00296498	0.243188	0.20526
1	COPG2	3.63884	0.288132	0.000273864	0.00301966	0.241449	0.205396
1	MRPS25	3.63828	0.280018	0.000274465	0.00302485	0.243478	0.20749
1	PDE5A	3.6378	0.482278	0.000274974	0.00302903	0.137391	0.100141
1	DHX35	3.62474	0.261792	0.000289248	0.00316821	0.248696	0.211624
1	UBAC1	3.62443	0.263981	0.000289602	0.00317059	0.243478	0.205913
1	YARS2	3.61771	0.314868	0.00029722	0.00324634	0.193623	0.155652
1	IPO11	3.61138	0.252347	0.000304574	0.00332198	0.270145	0.233545
1	RTF1	3.60738	0.252845	0.000309309	0.00336572	0.250435	0.212794
1	LYL1	3.60216	0.304845	0.000315584	0.00343078	0.196812	0.159215
1	VIPR1	3.60117	0.564448	0.000316787	0.00344063	0.112754	0.0754188
1	TOR1AIP1	3.57954	0.274368	0.000344203	0.00371752	0.242609	0.206729
1	SLC35B3	3.57293	0.279887	0.000353003	0.00380785	0.214203	0.177083
1	PPP1CC	3.56416	0.315972	0.000365021	0.00392774	0.192464	0.155081
1	KAT7	3.56397	0.253314	0.00036529	0.00392881	0.241159	0.203955
1	ZNF385A	3.56254	0.551363	0.000367282	0.00394293	0.118261	0.0816471
1	CCZ1	3.55393	0.420319	0.000379518	0.00406301	0.143768	0.106723
1	ADGRG5	3.54249	0.434481	0.000396373	0.00422785	0.148696	0.112244
1	AMY2B	3.54041	0.473576	0.000399513	0.00425939	0.132754	0.0961706
1	TUBB8	3.53919	0.577365	0.00040135	0.00427505	0.108116	0.0713936
1	HAAO	3.53759	0.470235	0.000403793	0.00429712	0.135652	0.0993799
1	TMEM220	3.53053	0.362952	0.000414726	0.00440093	0.176232	0.140095
1	GOPC	3.52696	0.259327	0.00042036	0.00445504	0.264638	0.230255
1	DZIP1L	3.52	0.476318	0.000431551	0.00457156	0.130725	0.0942668
1	AP001055.6	3.51675	0.428316	0.000436865	0.00461942	0.142899	0.106451
1	CHRFAM7A	3.51185	0.305379	0.000445002	0.0046969	0.191014	0.154101
1	RAP2C	3.50546	0.327897	0.000455827	0.00479155	0.176232	0.139469
1	DNM1	3.50282	0.625805	0.000460357	0.0048326	0.104348	0.0682931
1	ZNF26	3.50169	0.299534	0.000462325	0.00484668	0.210145	0.1745
1	RAB2B	3.49804	0.427024	0.000468699	0.00490686	0.153043	0.117629
1	RNF170	3.48385	0.259136	0.000494254	0.00515116	0.233623	0.197346
1	COL8A2	3.47949	0.404221	0.000502377	0.00523112	0.157391	0.121981
1	TRNT1	3.46505	0.250095	0.000530142	0.00549702	0.236522	0.200636
1	TNFSF8	3.46368	0.34196	0.000532846	0.00551376	0.172174	0.135988
1	MFSD8	3.46273	0.252475	0.000534733	0.00553081	0.235652	0.199603
1	NELFCD	3.45673	0.377257	0.000546777	0.00564533	0.166377	0.130902
1	ZNF43	3.45643	0.284379	0.000547372	0.00564895	0.228696	0.194082
1	FBXO4	3.45603	0.542116	0.000548204	0.00565503	0.126087	0.0911662
1	ANKDD1A	3.44895	0.511659	0.000562778	0.00578993	0.122319	0.0868418
1	TNFSF10	3.44732	0.353216	0.000566179	0.00581964	0.174203	0.138735
1	RHOBTB1	3.44226	0.313416	0.000576881	0.00591693	0.182899	0.146622
1	TSGA10	3.44183	0.314311	0.000577789	0.00592336	0.183478	0.147737
1	RP11-403P17.5	3.44012	0.49399	0.000581445	0.00595821	0.121159	0.0855363
1	SEMA6D	3.43858	0.281596	0.000584781	0.0059871	0.224058	0.189186
1	BRD3	3.43206	0.399863	0.000599021	0.00612479	0.154493	0.11937
1	ZNF317	3.42315	0.392746	0.000618995	0.00630956	0.158551	0.123776
1	NEB	3.42085	0.294176	0.000624261	0.00635487	0.198551	0.163049
1	ZNF322	3.42051	0.284714	0.000625045	0.00636006	0.203478	0.167782
1	SUMF2	3.41362	0.364247	0.00064105	0.00651434	0.169565	0.134655
1	BRCA1	3.41106	0.429004	0.000647111	0.00657018	0.133623	0.0979928
1	ROBO3	3.40771	0.444874	0.00065511	0.00663109	0.14029	0.105363
1	LINC00667	3.40405	0.415759	0.000663957	0.00670132	0.145797	0.110803
1	SLC25A3	3.40403	0.302088	0.000663996	0.00670132	0.188696	0.153313
1	RFT1	3.40388	0.517139	0.000664352	0.00670132	0.11971	0.0848292
1	OSBP	3.40276	0.269789	0.000667093	0.00672599	0.221739	0.186874
1	AMOTL1	3.39548	0.49812	0.000685078	0.00689099	0.129275	0.0948923
1	EPB42	3.39401	0.369775	0.00068876	0.0069204	0.163478	0.128508
1	FKTN	3.39202	0.29395	0.000693803	0.00696504	0.208696	0.173983
1	GRIK1	3.39031	0.437585	0.000698124	0.0069933	0.144638	0.110041
1	ZSCAN9	3.38981	0.424964	0.000699401	0.006998	0.148116	0.11355
1	PAAF1	3.38915	0.37205	0.000701089	0.00700785	0.163478	0.128916
1	UBLCP1	3.38527	0.352095	0.000711077	0.00709549	0.175652	0.140992
1	DNAJB12	3.37727	0.389418	0.000732099	0.00728435	0.155072	0.120485
1	PLD2	3.37108	0.371111	0.000748732	0.00743924	0.158261	0.12345
1	TIGD4	3.36144	0.488624	0.000775371	0.00768418	0.114493	0.0793897
1	CEACAM21	3.35024	0.311172	0.000807404	0.00796763	0.196812	0.162995
1	QTRT2	3.33784	0.27764	0.000844322	0.00829095	0.207536	0.172949
1	MFN2	3.33643	0.396783	0.000848606	0.00832818	0.156812	0.123123
1	CD99L2	3.33543	0.284436	0.000851666	0.00835115	0.209565	0.175343
1	MAP3K7CL	3.32876	0.427547	0.000872344	0.0085251	0.135072	0.100386
1	DLD	3.32126	0.272625	0.000896125	0.00874645	0.22087	0.187282
1	ENY2	3.31586	0.307274	0.000913616	0.00889846	0.194493	0.160792
1	AP3M1	3.31471	0.355588	0.000917389	0.00893146	0.165507	0.1315
1	HADH	3.31299	0.351325	0.000923026	0.00898257	0.161159	0.126632
1	CRTAP	3.30752	0.279409	0.000941271	0.00914862	0.192174	0.157419
1	SLC25A45	3.30123	0.584028	0.000962618	0.00934827	0.101739	0.0676403
1	ADGRG6	3.30106	0.295575	0.000963213	0.00935014	0.145797	0.110041
1	FANCM	3.29188	0.433441	0.000995197	0.00962438	0.136232	0.102317
1	RTCA	3.28988	0.255048	0.00100229	0.00968492	0.22058	0.18663
1	FAM200A	3.28442	0.362459	0.00102192	0.00985408	0.150725	0.116487
1	ORC5	3.27001	0.256567	0.00107542	0.0103185	0.266087	0.235966
1	FFAR4	3.25775	0.47651	0.001123	0.0107307	0.11942	0.0856995
1	SAP30BP	3.25659	0.271701	0.00112761	0.0107703	0.206957	0.173276
1	PSMG4	3.25394	0.348388	0.00113815	0.0108665	0.15913	0.125408
1	TAF8	3.25121	0.301659	0.00114916	0.0109536	0.193913	0.160738
1	TRAFD1	3.25016	0.320483	0.00115339	0.0109894	0.175942	0.142488
1	NUBP1	3.24337	0.346526	0.00118125	0.0112364	0.163478	0.130059
1	ZNF821	3.22561	0.526298	0.00125706	0.0118941	0.111594	0.0784106
1	MTFMT	3.22478	0.274063	0.00126068	0.0119187	0.203188	0.170066
1	TAF7	3.21374	0.36705	0.00131016	0.0123228	0.174493	0.143005
1	DGKG	3.21116	0.488071	0.001322	0.0124225	0.130145	0.0978296
1	COMMD7	3.20656	0.358147	0.00134333	0.0125873	0.152464	0.11937
1	ZCCHC24	3.1931	0.357879	0.00140756	0.0131466	0.152464	0.119479
1	GM2A	3.19011	0.377263	0.00142219	0.013262	0.146087	0.113142
1	ANK3	3.18015	0.635433	0.00147199	0.0136714	0.106377	0.0744125
1	THAP6	3.16847	0.429419	0.00153244	0.0141817	0.127826	0.0950011
1	RPAIN	3.14785	0.266219	0.00164474	0.0151186	0.201739	0.169278
1	RNF214	3.13203	0.28768	0.00173602	0.0158821	0.188696	0.156304
1	SMIM4	3.13171	0.305829	0.00173791	0.0158932	0.182609	0.150892
1	PROCR	3.12442	0.350646	0.00178156	0.0162604	0.154203	0.122063
1	PRTFDC1	3.11685	0.488836	0.00182795	0.0166118	0.123768	0.0921725
1	RPA3	3.11478	0.481053	0.00184079	0.0166828	0.115652	0.0835237
1	POLM	3.08917	0.416699	0.00200719	0.018022	0.128986	0.0971225
1	FAM219B	3.06815	0.269534	0.00215388	0.0192276	0.184928	0.15266
1	NCMAP	3.0676	0.421445	0.00215787	0.0192483	0.124638	0.0929341
1	AP002884.2	3.06729	0.389898	0.00216007	0.0192606	0.133043	0.101175
1	RP11-733O18.1	3.05868	0.396722	0.00222316	0.0197624	0.135072	0.103541
1	DNAH1	3.05693	0.278749	0.00223616	0.0198551	0.197971	0.167129
1	DHX30	3.0439	0.264448	0.00233536	0.0206569	0.196812	0.165252
1	EMID1	3.03985	0.452582	0.00236695	0.0209204	0.113913	0.082191
1	RP11-281A20.2	3.03871	0.58471	0.00237595	0.020976	0.104058	0.0733246
1	TMEM263	3.01859	0.305883	0.00253957	0.0222848	0.177101	0.146377
1	LINC01356	3.01121	0.459436	0.00260206	0.0227901	0.112174	0.0808312
1	SNRPA1	3.00644	0.278056	0.00264322	0.0231182	0.171594	0.13985
1	ZNF354A	3.00241	0.384902	0.0026785	0.0233538	0.143768	0.113495
1	CASC15	2.99647	0.544348	0.00273123	0.0237779	0.111014	0.0805592
1	LINC01376	2.98495	0.390309	0.00283627	0.0246	0.147536	0.117167
1	EXOSC6	2.98324	0.378352	0.0028521	0.0247005	0.132754	0.101719
1	ZNF7	2.97866	0.419118	0.00289516	0.025036	0.126957	0.0964698
1	MBTPS2	2.97817	0.314553	0.00289973	0.0250569	0.178841	0.149342
1	EID1	2.96945	0.267531	0.00298332	0.0257409	0.184058	0.153149
1	CMTR1	2.96843	0.278588	0.0029933	0.0258078	0.175362	0.144392
1	TTC31	2.96477	0.471857	0.00302904	0.0260869	0.109565	0.0789273
1	ZDBF2	2.96052	0.437359	0.00307117	0.0264203	0.127826	0.0977752
1	LRP8	2.95603	0.288779	0.00311625	0.0267485	0.184058	0.154183
1	DNAJC17	2.9539	0.305964	0.00313784	0.0269041	0.157971	0.127203
1	PTPN7	2.94756	0.477739	0.00320293	0.0273913	0.112464	0.0822182
1	PEX1	2.94518	0.290776	0.00322762	0.027572	0.18029	0.150185
1	AASS	2.94489	0.295042	0.00323065	0.0275796	0.176522	0.14635
1	MORC1	2.94226	0.298817	0.00325821	0.0278026	0.149565	0.118282
1	MTMR8	2.93696	0.298931	0.00331443	0.0281891	0.177101	0.14703
1	KLHDC2	2.92591	0.251599	0.00343446	0.0290871	0.194493	0.163974
1	TUBGCP4	2.9255	0.393504	0.00343907	0.0290999	0.135072	0.105064
1	ABHD10	2.91876	0.360496	0.00351422	0.029689	0.14087	0.11064
1	RBM4B	2.90959	0.336369	0.00361904	0.0305114	0.145797	0.115562
1	ZNF41	2.90796	0.253468	0.00363798	0.0306488	0.189275	0.158997
1	SLC35C2	2.90784	0.340705	0.00363929	0.0306488	0.150725	0.121002
1	AC009784.3	2.90704	0.270139	0.00364864	0.030694	0.172464	0.141808
1	LINC00630	2.9029	0.340975	0.00369725	0.0310804	0.145797	0.115998
1	MDH2	2.90253	0.491048	0.0037016	0.0311	0.101449	0.0713392
1	DCAF16	2.8994	0.298863	0.00373883	0.0313849	0.168696	0.138789
1	PCYT1A	2.89868	0.29648	0.00374739	0.031445	0.157391	0.126958
1	FLVCR1	2.89456	0.271728	0.0037969	0.0318259	0.175072	0.144664
1	TP53I11	2.89357	0.309113	0.00380892	0.0319152	0.158261	0.128182
1	NAGA	2.89224	0.304911	0.00382511	0.0320393	0.153623	0.123314
1	TMEM104	2.88837	0.388622	0.00387238	0.0324118	0.126667	0.0968777
1	RNF219	2.86793	0.271589	0.00413168	0.0343961	0.177101	0.147139
1	KIF20B	2.8461	0.313356	0.00442585	0.0366348	0.167536	0.138816
1	NIT1	2.84498	0.37176	0.00444148	0.0367511	0.136232	0.107104
1	CRY2	2.83626	0.477743	0.00456451	0.0377153	0.111304	0.0824358
1	CGNL1	2.83396	0.397743	0.00459752	0.037961	0.111304	0.0816743
1	MAP4K1	2.81946	0.465525	0.00481039	0.0395639	0.110725	0.0818103
1	ASMTL	2.79285	0.454827	0.00522467	0.0426538	0.110725	0.0821094
1	LDB1	2.78007	0.292622	0.00543474	0.0441359	0.151014	0.121736
1	ARSG	2.76888	0.28616	0.00562486	0.0455086	0.157391	0.128481
1	PRKAG1	2.76411	0.253332	0.00570776	0.0461111	0.181449	0.152687
1	LINC00909	2.75077	0.3597	0.0059456	0.0478169	0.122029	0.093206
1	NSMCE4A	2.75057	0.332037	0.00594925	0.0478289	0.141159	0.112734
1	LINC00891	2.74639	0.43686	0.00602552	0.048425	0.108696	0.0802872
1	PYM1	2.74537	0.373052	0.00604422	0.0485252	0.135362	0.107485
1	MRPL19	2.74398	0.28655	0.00606992	0.048681	0.166667	0.138408
1	PIGB	2.73977	0.261532	0.00614819	0.0492067	0.174203	0.145697
1	JUNB	-2.74379	-0.399518	0.00607352	0.0486931	0.108986	0.136423
1	PLAT	-2.756	-0.507881	0.00585127	0.0471228	0.108406	0.134166
1	THOC3	-2.77122	-0.255436	0.00558464	0.0452108	0.19971	0.225441
1	MEF2D	-2.78451	-0.256489	0.00536094	0.0436281	0.168986	0.197074
1	WWC3	-2.79232	-0.312908	0.00523323	0.0427086	0.133623	0.161771
1	PXN	-2.87555	-0.267332	0.00403319	0.0336486	0.184348	0.211896
1	BET1	-2.89084	-0.302267	0.00384218	0.0321707	0.156522	0.185243
1	EIF4EBP2	-2.89939	-0.289477	0.00373887	0.0313849	0.170435	0.198325
1	ACADVL	-2.90248	-0.386197	0.00370225	0.0311	0.106957	0.136559
1	ACVR1B	-2.91206	-0.326197	0.00359059	0.0302826	0.136812	0.166041
1	PUS10	-2.94912	-0.265177	0.00318677	0.0272732	0.175072	0.204662
1	SLC31A1	-2.9586	-0.302425	0.0030904	0.0265562	0.149565	0.179422
1	VPS13A	-2.96606	-0.276198	0.00301641	0.0259973	0.170725	0.200174
1	CRELD1	-2.97253	-0.353863	0.00295358	0.0255032	0.117391	0.147846
1	RPL7	-2.98612	-0.425075	0.00282539	0.0245149	0.14058	0.168217
1	ST3GAL2	-2.99213	-0.28576	0.00277036	0.0240734	0.157391	0.187745
1	DYNLT1	-3.0305	-0.316685	0.00244152	0.0215058	0.155652	0.18546
1	AKR1B1	-3.0321	-0.300314	0.00242855	0.0213996	0.177971	0.206457
1	GDAP1	-3.04358	-0.281072	0.00233779	0.0206705	0.189565	0.218451
1	RP11-420A23.1	-3.06677	-0.322602	0.00216384	0.0192848	0.144928	0.175859
1	RPS4X	-3.06793	-0.468712	0.0021555	0.0192346	0.152464	0.179504
1	SEPT10	-3.0935	-0.296585	0.00197808	0.0177974	0.166377	0.196992
1	FXYD5	-3.09815	-0.400404	0.00194731	0.0175591	0.111304	0.142706
1	RPS12	-3.10154	-0.3443	0.00192519	0.0173867	0.23971	0.263082
1	GYS1	-3.11904	-0.392965	0.00181439	0.0165016	0.122899	0.154129
1	LINC00578	-3.12214	-0.315673	0.00179544	0.0163548	0.168406	0.198814
1	RPS29	-3.12851	-0.30058	0.00175692	0.0160481	0.213333	0.240889
1	ITGB1BP1	-3.14326	-0.386299	0.00167078	0.0153267	0.11942	0.151246
1	TMEM140	-3.14761	-0.474014	0.00164609	0.015125	0.101159	0.132751
1	LTA4H	-3.14831	-0.27631	0.00164217	0.015101	0.175362	0.207273
1	DEAF1	-3.19491	-0.275612	0.00139876	0.0130745	0.186377	0.217553
1	RPL27A	-3.19908	-0.416851	0.00137867	0.0128924	0.194493	0.220763
1	PLEKHF2	-3.20912	-0.269251	0.00133142	0.0124895	0.190435	0.221932
1	PXK	-3.21309	-0.282122	0.00131315	0.0123444	0.188696	0.219566
1	ACTN4	-3.21475	-0.28583	0.00130556	0.012298	0.169855	0.202649
1	VASP	-3.24483	-0.303506	0.0011752	0.0111834	0.157391	0.190356
1	NARF	-3.25132	-0.275125	0.00114871	0.0109536	0.184348	0.21671
1	RPL19	-3.26168	-0.420833	0.00110754	0.0106091	0.231594	0.253944
1	UACA	-3.27746	-0.285686	0.00104744	0.0100625	0.198261	0.230037
1	KLHL36	-3.27949	-0.347404	0.00103994	0.0100029	0.147536	0.179803
1	HEXB	-3.30042	-0.256298	0.000965398	0.00936743	0.214203	0.246546
1	NFAM1	-3.31932	-0.406291	0.000902363	0.00880363	0.123478	0.156685
1	EEF1A1	-3.33054	-0.269533	0.000866779	0.00847428	0.369275	0.384383
1	MT-ND1	-3.33118	-0.333155	0.000864792	0.00845842	0.17913	0.210428
1	NBPF15	-3.33465	-0.255952	0.000854081	0.00836776	0.202029	0.235395
1	NRP1	-3.37275	-0.301381	0.000744218	0.00739756	0.224928	0.254107
1	ABHD13	-3.37329	-0.278243	0.000742762	0.00738625	0.172754	0.207517
1	ALKBH5	-3.37723	-0.360705	0.000732201	0.00728435	0.137971	0.172106
1	SLC25A32	-3.38367	-0.259081	0.000715227	0.00713076	0.237971	0.268984
1	RIPK2	-3.39095	-0.263409	0.000696513	0.0069862	0.2	0.233845
1	MYO7A	-3.40492	-0.34634	0.000661827	0.00669034	0.156522	0.190111
1	SH3GL1	-3.40867	-0.320536	0.000652796	0.00661176	0.181159	0.2138
1	RPL29	-3.40895	-0.461073	0.000652128	0.00661103	0.156522	0.187337
1	MORF4L2	-3.40972	-0.293026	0.000650287	0.00659666	0.187826	0.221497
1	ADAMTSL2	-3.42111	-0.300388	0.000623656	0.00635149	0.22058	0.250408
1	RPL23	-3.42712	-0.440862	0.00061001	0.00622344	0.198261	0.226121
1	MAPKAPK2	-3.42943	-0.280097	0.000604845	0.00617618	0.196812	0.23069
1	TRNAU1AP	-3.43077	-0.374267	0.000601864	0.00615116	0.144348	0.178198
1	RPL31	-3.43273	-0.293736	0.000597537	0.00611232	0.268696	0.295991
1	UNC13B	-3.43514	-0.398344	0.000592253	0.00606093	0.109275	0.144909
1	TXLNA	-3.45695	-0.384544	0.000546331	0.00564323	0.131884	0.166531
1	RPL11	-3.48592	-0.329038	0.000490439	0.00511932	0.335942	0.353215
1	UNC13D	-3.48607	-0.455387	0.00049017	0.00511932	0.114203	0.14926
1	TPCN2	-3.48935	-0.469029	0.000484202	0.00506003	0.103768	0.139388
1	RPL9	-3.50408	-0.384706	0.000458182	0.00481194	0.181449	0.213093
1	HSP90B1	-3.50561	-0.270014	0.000455566	0.00479097	0.334493	0.354792
1	PFKL	-3.50642	-0.395739	0.000454177	0.00478287	0.126667	0.162397
1	FAM114A1	-3.50885	-0.25754	0.000450055	0.00474592	0.24	0.273145
1	RPL14	-3.5173	-0.400393	0.000435956	0.00461191	0.189855	0.220763
1	TPP1	-3.52894	-0.314076	0.00041722	0.00442379	0.181449	0.215976
1	MAFG	-3.55795	-0.388923	0.000373764	0.00400696	0.126957	0.163267
1	RXRA	-3.55824	-0.312895	0.000373348	0.00400434	0.193043	0.227018
1	INPP5F	-3.57265	-0.255624	0.000353387	0.00380785	0.246957	0.280788
1	SLC20A1	-3.57278	-0.285852	0.000353215	0.00380785	0.20058	0.235477
1	SLC35E3	-3.59488	-0.327896	0.000324542	0.00351663	0.188986	0.223238
1	JUND	-3.62308	-0.469668	0.000291119	0.0031842	0.114783	0.151218
1	RUSC2	-3.63371	-0.442695	0.000279374	0.00307165	0.117971	0.154972
1	ICA1	-3.6402	-0.476923	0.000272429	0.00300526	0.125217	0.160928
1	AK3	-3.65117	-0.357731	0.000261052	0.00289075	0.147536	0.184835
1	CCT6A	-3.6626	-0.331556	0.00024967	0.00277133	0.167826	0.204689
1	FPR1	-3.66349	-0.438983	0.000248802	0.00276302	0.124058	0.160982
1	ZNF804A	-3.67851	-0.388388	0.000234597	0.00261653	0.223478	0.254052
1	CD55	-3.6817	-0.413354	0.00023168	0.00258523	0.150435	0.186494
1	FAM173B	-3.68668	-0.429319	0.000227201	0.00254259	0.126957	0.163974
1	RP11-693J15.5	-3.68935	-0.435058	0.000224826	0.00251722	0.127246	0.1646
1	POLN	-3.69577	-0.466533	0.000219218	0.00246633	0.113913	0.151436
1	RASGRP3	-3.70052	-0.31981	0.000215161	0.00242775	0.188406	0.224733
[truncated: 23,013 more rows]

## Sheet: GSEA per cluster_all donors 
pathway	pval	padj	log2err	ES	NES	size	group	-log10(pval)	-log10(padj)	Genes
DNA Repair	0.0215812	0.241709	0.352488	-0.842714	-1.616	50	1	1.66592	0.616707	PDE4B,SDCBP
Fatty Acid Metabolism	1.34675e-05	0.000754178	0.593325	-0.936112	-1.80543	54	1	4.87071	3.12253	HSP90AA1,HSPH1,ACSL1,XIST,LDHA
Hypoxia	0.0109418	0.188561	0.38073	-0.794635	-1.60259	103	1	1.96091	0.724549	P4HA1,SLC2A3,DUSP1,BNIP3L,PGK1,CXCR4,ZNF292,LDHA,PDK1,VEGFA,RBPJ,NEDD4L,TGFBI,HMOX1,MXI1,DDIT4,GAPDH,PPP1R15A,CDKN1A,PFKP,LARGE1,DTNA,NFIL3,FOSL2,SAP30,ERO1A,FOS,P4HA2,GPI,PIM1,TPI1,PLAUR,SDC2,ENO1,ZFP36,PGM1,PLIN2,SLC2A1,PAM,CCNG2,TES,FAM162A,BHLHE40,NDRG1,ADM,TPD52,VLDLR,PPFIA4,HSPA5,AK4,BTG1,ETS1,TNFAIP3,JUN,GBE1,SERPINE1,ENO2,UGP2,RRAGD,ANXA2
KRAS Signaling Up	0.0134686	0.188561	0.38073	-0.829971	-1.67121	73	1	1.87068	0.724549	SPP1,GPNMB,CXCR4,TNFRSF1B,F13A1,MAFB,TMEM176B,PPP1R15A,RGS16,SPON1,LY96,ERO1A,PRDM1,PLAUR
mTORC1 Signaling	0.00146961	0.0411491	0.45506	-0.839761	-1.70515	106	1	2.8328	1.38564	P4HA1,SLC2A3,STIP1,PGK1,CXCR4,LDHA,PDK1,NAMPT,LGMN,DDIT4,GAPDH,PPP1R15A,HSPD1,CDKN1A,NFIL3,SLC7A5,CACYBP,BCAT1,ERO1A,NUPR1,GPI,TPI1,ENO1,PGM1,SLC2A1,HSPA4,CD9,TES,PPA1,BHLHE40,UBE2D3,DHFR,VLDLR,HSPA5,ELOVL5,AK4,CALR,TFRC,GBE1
Hypoxia	0.00262324	0.146902	0.431708	-0.79621	-1.6262	73	10	2.58116	0.832973	DUSP1,SERPINE1,FOS,CXCR4,JUN,PPP1R15A,KLHL24,FOSL2,CCNG2,SLC2A3,IRS2,PFKFB3,NDRG1,SAP30,GBE1,MXI1,SCARB1,KDM3A,ANXA2,PLAC8,S100A4
Allograft Rejection	0.00154407	0.043234	0.45506	-0.730598	-1.5061	90	11	2.81133	1.36417	IL15,HLA-DRA,HLA-DMB,SRGN,B2M,CD74,CTSS,RPS19,RPS3A,IGSF6,ACVR2A,NLRP3,HLA-E,RPS9,MRPL3,RPL9,STAB1,HLA-A,NPM1,TPD52,HLA-DQA1,IKBKB,IL18,GPR65,NCK1
Inflammatory Response	0.0181684	0.210719	0.352488	-0.680222	-1.40335	92	11	1.74068	0.676296	IL15,CLEC5A,ABCA1,MSR1,CMKLR1,CD14,GPR183,AXL,C3AR1,ACVR2A,OLR1,NLRP3,ATP2B1,SERPINE1,STAB1,C5AR1,EIF2AK2,HRH1,SEMA4D,KIF1B,IL18,RAF1,BST2
Interferon Alpha Response	0.0290828	0.21098	0.282013	-0.679602	-1.37578	70	11	1.53636	0.67576	IL15,IFI44,B2M,IFI44L,CD74,NCOA7,PSMA3,TRIM5,HLA-C,TRIM14,OAS1,EIF2AK2,HERC6,BST2,MX1,SAMD9L,CASP8,CD47
Interferon Gamma Response	0.0301399	0.21098	0.271289	-0.62562	-1.32485	128	11	1.52086	0.67576	IL15,HLA-DRB1,TNFAIP2,IFI44,B2M,IFI44L,CMKLR1,FGL2,CD74,BTG1,PSMA3,ARID5B,ST3GAL5,HLA-A,MX2,TRIM14,DDX58,EIF2AK2,HLA-B,HLA-DQA1,HERC6,RIPK1,BST2,MX1,XAF1,SAMD9L,VAMP8,CASP8,IL15RA
KEGG_RIBOSOME	2.0401e-11	1.14246e-09	0.863415	-0.912645	-1.86037	80	11	10.6903	8.94216	RPS27,RPLP1,RPL11,RPL13,RPS18,RPL5,RPL32,RPS2,RPL23,RPL19,RPS27A,RPL30,RPL34,RPLP2,RPS23,RPL27A,RPS8,RPL10,RPL37,RPL3,RPS25,RPS3,RPL21,RPS15,RPS12,RPL7A,FAU,RPS6,RPL37A,RPS20,RPL15,RPS11,RPL27,RPS24,RPL12,RPL38,RPL35,RPL18,RPL23A,RPL13A,RPS28,RPL35A,RPS4X,RPL31,RPL8,RPL28,RPL14,RPL18A,RPS7,RPL36,RPS19,UBA52,RPS3A,RPS13,RPS17,RPL41,RPS16,RPS5,RPL6,RPL10A,RPSA,RPL29,RPS15A,RPS9,RPL9,RPL24,RPS21,RPL…
KRAS Signaling Dn	0.0188142	0.210719	0.352488	-0.753099	-1.47906	36	11	1.72551	0.676296	THRB,ZBTB16,IFI44L,SGK1,FGGY,GRID2,TG,VPS50,SLC29A3,MX1
Reactive Oxygen Species Pathway	0.0238878	0.21098	0.352488	0.713526	1.50177	38	11	1.62182	0.67576	IPCEF1,MBP,PFKP,SBNO2
Xenobiotic Metabolism	0.0138648	0.210719	0.38073	-0.677196	-1.39631	91	11	1.85809	0.676296	ESR1,APOE,KYNU,CYP27A1,TMBIM6,ABCC3,MAN1A1,GCLC,SERPINE1,SSR3,ATOH8,DHRS7,PTS,NPC1,IGF1,SLC46A3
Hypoxia	0.0058276	0.163173	0.407018	0.83484	1.63895	69	15	2.23451	0.787352	PLAC8,P4HA1,SERPINE1,IRS2,DUSP1,DTNA,KDM3A,SLC6A6,BNIP3L,ZNF292,NEDD4L,DDIT4,SAP30,PDK1,NDST1,NDRG1,HK2,KLHL24,HK1,CCNG2,GLRX,PGK1,MYH9,BHLHE40,LDHA
KEGG_RIBOSOME	2.80084e-06	0.000156847	0.627257	-0.859445	-1.90256	67	15	5.55271	3.80452	RPL19,RPL32,RPLP1,RPL34,RPS8,RPL23A,RPS27,RPS27A,RPL27A,UBA52,RPL10,RPS23,RPS25,RPLP2,RPL38,RPS3A,FAU,RPL18A,RPL24,RPS18,RPS24,RPL11,RPS13,RPL28,RPL3,RPL35A,RPL41,RPS12,RPL36,RPS7,RPL13A,RPL8,RPS20,RPL12,RPL23,RPS21,RPL15,RPL30,RPL21,RPS4X,RPL7,RPS17,RPL35,RPL6,RPL37,RPL36AL,RPS2,RPL29,RPS15,RPL13,RPS11,RPL5,RPL14
KEGG_HUNTINGTONS_DISEASE	0.0176755	0.247457	0.352488	0.738651	1.67144	31	16	1.75263	0.6065	ITPR1,PPARG,GNAQ
KEGG_RIBOSOME	1.00493e-17	5.6276e-16	1.08644	-0.931538	-2.36523	61	16	16.9979	15.2497	RPLP2,RPS23,RPLP1,RPL32,RPS27,RPL11,RPS4X,RPL34,RPL27A,RPL23,RPL38,RPS6,RPS20,RPL35A,RPL23A,UBA52,RPS11,RPS15,FAU,RPS27A,RPL37A,RPL10,RPS25,RPL8,RPL24,RPS24,RPS8,RPS3A,RPL29,RPS16,RPS18,RPL41,RPS21,RPL12,RPL19,RPL30,RPS19,RPL13,RPL14,RPS13,RPL28,RPL37,RPL7,RPS12,RPL27,RPL13A,RPL35,RPL21,RPS28,RPL18A,RPS15A,RPL36,RPL7A,RPS3,RPL6,RPS7
Reactive Oxygen Species Pathway	0.00518702	0.0968244	0.407018	-0.904748	-1.8833	9	16	2.28508	1.01402	FTL
TNF-alpha Signaling via NF-kB	0.000515378	0.0144306	0.477271	-0.775061	-1.8791	49	16	3.28787	1.84072	DUSP1,SLC2A3,SAT1,FOS,NAMPT,CD83,PPP1R15A,CDKN1A,EIF1,FOSL2,SGK1,PFKFB3,ZFP36,CEBPD,CEBPB,JUNB,IER3,IER2,TNFAIP3,VEGFA
Apical Surface	0.0208971	0.117024	0.352488	0.963896	1.45252	12	2	1.67991	0.931725	SULF2,HSPB1,PLAUR
Fatty Acid Metabolism	0.00477635	0.0534952	0.407018	0.917194	1.48749	53	2	2.3209	1.27169	HSP90AA1,HSPH1,ACSL1,GLUL,LDHA,ENO2
Hypoxia	2.69748e-06	0.000151059	0.627257	0.935648	1.55912	103	2	5.56904	3.82085	SLC2A3,DUSP1,DDIT4,PPP1R15A,P4HA1,PGK1,BNIP3L,PFKFB3,GBE1,HMOX1,FOS,PFKP,FAM162A,HK2,ENO1,PDK1,ZNF292,CDKN1A,ERO1A,MXI1,SLC2A1,NEDD4L,VEGFA,CXCR4,LDHA,ADM,ZFP36,JUN,SLC2A5,KDM3A,GPI,PPFIA4,ENO2,RBPJ,P4HA2,AK4,PGM1,PDK3,PLAC8,BHLHE40,TPI1,PDGFB,GAPDH,SERPINE1,FOSL2,PPP1R3C,UGP2,ANKZF1,CCNG2,GYS1
IL-2/STAT5 Signaling	0.0391198	0.199155	0.252961	0.835016	1.39238	85	2	1.4076	0.700808	SLC2A3,SPP1,P4HA1,HK2,RGS16,TNFRSF1B,PLSCR1,DENND5A,BHLHE40,IL4R,TIAM1,ITGAV,IGF1R,DHRS3,CDC42SE2
KEGG_GLYCOLYSIS_GLUCONEOGENESIS	0.0136315	0.0892712	0.38073	0.936815	1.46589	27	2	1.86546	1.04929	PGK1,PFKP,HK2,ENO1,LDHA,PKM,GPI,ENO2,PGM1,TPI1,GAPDH
Myc Targets V1	0.0143472	0.0892712	0.38073	0.863336	1.44151	91	2	1.84323	1.04929	PGK1,HSP90AB1,LDHA,PTGES3,CUL1,HSPD1
TNF-alpha Signaling via NF-kB	0.00304187	0.0456945	0.431708	0.891268	1.48959	95	2	2.51686	1.34014	SLC2A3,DUSP1,PPP1R15A,PFKFB3,FOS,CEBPD,CDKN1A,PDE4B,BCL6,VEGFA,NAMPT,ZFP36,IER5,JUN,DENND5A,JUNB,MCL1,BHLHE40,REL,BTG2,SERPINE1,TNIP1,FOSL2,GPR183,SGK1,SOCS3,TNFAIP8,ETS2,CD69,PNRC1,SOD2
UV Response Up	0.0142247	0.0892712	0.38073	0.895481	1.44828	51	2	1.84696	1.04929	DNAJB1,HMOX1,FOS,MGAT1,ENO2,JUNB,BTG2,STIP1,DNAJA1,SOD2,TFRC
Unfolded Protein Response	0.00987614	0.0892712	0.38073	0.897475	1.46226	57	2	2.00541	1.04929	DDIT4,SLC7A5,ERO1A,VEGFA,BAG3,EDEM1
mTORC1 Signaling	1.69764e-05	0.000475338	0.57561	0.918921	1.53374	112	2	4.77016	3.323	SLC2A3,DDIT4,PPP1R15A,P4HA1,PGK1,BCAT1,GBE1,SLC7A5,HK2,ENO1,PDK1,CDKN1A,ERO1A,SLC2A1,CXCR4,LDHA,NAMPT,GPI,AK4,PGM1,BHLHE40,GGA2,TPI1,BTG2,EDEM1,STIP1,GAPDH
p53 Pathway	0.0032639	0.0456945	0.431708	0.890846	1.48889	95	2	2.48626	1.34014	DDIT4,PPP1R15A,HMOX1,FOS,FAM162A,RGS16,CDKN1A,IER5,JUN,BTG2,BAIAP2
Hypoxia	0.00259891	0.121839	0.431708	-0.836318	-1.56377	109	3	2.58521	0.914214	P4HA1,DUSP1,DDIT4,DTNA,CXCR4,SERPINE1,KDM3A,RBPJ,FOS,ZNF292,SLC2A3,PFKP,LDHA,PGK1,SAP30,BNIP3L,NEDD4L,ENO1,JUN,PPP1R15A,ZFP36,TGFBI,PLAC8,VEGFA,FOSL2,SLC2A1,HMOX1,IRS2,PLAUR,BHLHE40,ANXA2,GPI,PGM1,NFIL3,FAM162A,S100A4,PDGFB,GAPDH,PIM1,NDST1,MXI1,BCL2,ERO1A,ADM
KEGG_RIBOSOME	0.00435139	0.121839	0.407018	-0.856597	-1.58843	76	3	2.36137	0.914214	RPS19,RPL13,RPL28,RPS28,RPS2,RPL18,RPS9,RPL35,RPL37A,RPL10,RPS6,RPS27,RPL3,RPS15,RPL7A,RPS3,RPS27A,RPL13A,RPL37,RPS5,RPS18,RPL18A,RPS8,RPS12,RPL36,RPLP1,RPLP0,RPS15A,RPL11,RPS4Y1,RPL19,RPL12,RPL10A,RPL6,RPS16,RPS20,RPL32,RPS17,RPL41,RPS23,RPL23A,RPS24,RPL35A,RPS25,RPL27,RPL7,RPL14,RPL29,RPL8,UBA52,RPL9,RPS13,RPL38,FAU,RPS7,RPL23,RPSA,RPS21,RPL27A,RPL24,RPS11,RPS3A
Allograft Rejection	0.00137141	0.0076799	0.45506	-0.628897	-1.25012	113	5	2.86283	2.11464	BCAT1,B2M,RPS19,ITGB2,RPS9,IL4R,HLA-A,IFNAR2,SPI1,IL15,GPR65,CTSS,FGR,HLA-E,IRF8,FCGR2B,STAB1,RIPK2,TLR2,RPS3A,RPL9,CD47,MAP3K7,ITGAL,TAPBP,MRPL3,IL16,SRGN,GBP2,LCP2,ABCE1,CD4,EIF3A,HIF1A,CCR1
Androgen Response	0.034965	0.10878	0.24134	-0.6046	-1.19071	79	5	1.45637	0.963451	ARID5B,PTK2B,TNFAIP8,B2M,SEC24D,ELOVL5,SPCS3,VAPA,SLC38A2,GNAI3,IQGAP2,NGLY1,UBE2J1,ACSL3,B4GALT1,CDC14B,ELK4
Apoptosis	0.044955	0.132499	0.2114	-0.576837	-1.14641	110	5	1.34722	0.877787	IGF2R,DNAJA1,HSPB1,HMOX1,SOD2,TXNIP,CASP4,BNIP3L,DNAJC3,MCL1,NEDD9,CASP1,SQSTM1,GPX1,PDCD4,CDKN1A,CD14,SLC20A1,BTG2,CTNNB1,DNM1L,DAP3,XIAP,TSPO,CYLD,CCND1,BCL2L1,ETF1,APP,PAK1,GSN,MGMT,DPYD,VDAC2,BCL2L11,SPTAN1,DAP,IFITM3,CCND2,TIMP2,MADD,ADD1,GSR,GNA15,BMF,PSEN1
Complement	0.000709813	0.00648447	0.477271	-0.627036	-1.25007	135	5	3.14886	2.18813	C1QC,LGMN,LAP3,LIPA,C1QA,CPM,CASP4,PLSCR1,HSPA5,GCA,CTSH,KYNU,CTSS,ADAM9,PIK3CA,GNAI3,SERPINA1,APOC1,CASP1,PLA2G7,ANXA5,PREP,FCER1G,TNFAIP3,LTA4H,XPNPEP1,CEBPB,CTSC,PIK3CG,IRF2,PLEK,S100A9,LCP2,GPD2,GNG2,PPP2CB,RAF1,PFN1,VCPIP1,CBLB,USP8,KIF2A,CD55,CALM1,GNAI2,PLAUR,ERAP2,PIM1,LAMP2
Glycolysis	0.001353	0.0076799	0.45506	-0.616481	-1.22895	134	5	2.8687	2.11464	PYGL,PGK1,LDHA,PKM,ERO1A,SAP30,UGP2,GALK2,PDK3,HK2,DDIT4,ENO1,HSPA5,PFKP,VEGFA,SLC16A3,FAM162A,TGFBI,IDH1,GLRX,FUT8,MXI1,AK3,FKBP4,NASP,B4GALT1,RPE,GFPT1,CXCR4,COG2,PPP2CB,TPI1,GCLC,PAM,ALDOA,HDLBP,P4HA1,DSC2,EXT2,ME2,KIF2A
Hypoxia	6.51344e-07	1.21584e-05	0.659444	-0.683682	-1.36301	132	5	6.18619	4.91512	PGK1,SLC2A3,LDHA,PDK1,DUSP1,ERO1A,SAP30,HMOX1,UGP2,GPI,GAPDH,PDK3,HK2,DDIT4,ENO1,HSPA5,PFKP,KLF6,BNIP3L,PNRC1,KDM3A,VEGFA,ATP7A,FAM162A,TGFBI,BTG1,CCNG2,GLRX,CDKN1A,PLIN2,MXI1,NFIL3,TNFAIP3,XPNPEP1,LARGE1,GBE1,FOS,PPP1R15A,ZFP36,GAA,KLHL24,HK1,SLC2A1,NAGK,CXCR4,PLAC8,TPI1,PAM,SLC6A6,FOSL2,ALDOA,SCARB1,HDLBP,P4HA1,PGM1
IL-2/STAT5 Signaling	0.00412711	0.0174008	0.407018	-0.606556	-1.20815	129	5	2.38435	1.75943	SLC2A3,IGF2R,MAP3K8,CD81,IL4R,CTSZ,PLSCR1,HK2,IKZF2,KLF6,IL10RA,GPR65,SPP1,NFKBIZ,IRF8,IGF1R,MYO1E,FGL2,PLIN2,NFIL3,SERPINB6,MXD1,SPRED2,SNX14,NRP1,ITGA6,SYNGR2,DHRS3,SNX9,MAPKAPK2,FAM126B,BCL2L1,P4HA1,RGS16,P2RX4,ANXA4,PRNP,PIM1,UCK2,HUWE1,PLPP1,CD83,PHTF2,IFITM3,CDCP1,CCND2,SLC1A5,CAPG,TNFRSF1B
Inflammatory Response	0.00435019	0.0174008	0.407018	-0.61267	-1.21875	115	5	2.36149	1.75943	RNF144B,NAMPT,IL4R,KLF6,IL10RA,FPR1,IL15,ATP2A2,GNAI3,IFNAR1,ABCA1,CLEC5A,STAB1,BST2,RIPK2,NFKB1,TLR2,PDPN,CDKN1A,CD14,BTG2,EBI3,EIF2AK2,MXD1,TAPBP,C3AR1,SLC31A1,LCP2,C5AR1,SLC11A2,HIF1A
Interferon Alpha Response	0.000810559	0.00648447	0.477271	-0.664629	-1.30948	80	5	3.09122	2.18813	LAP3,EPSTI1,PARP9,B2M,TXNIP,IL4R,PLSCR1,HLA-C,IL15,NCOA7,TRIM14,BST2,CASP1,RIPK2,TDRD7,TRIM5,TRIM25,CD47,EIF2AK2,ADAR,IRF2,IFI44L,GBP2,TMEM140,SP110
Interferon Gamma Response	3.35344e-06	4.69482e-05	0.627257	-0.656808	-1.31378	152	5	5.47451	4.32838	ARID5B,HLA-B,NAMPT,FCGR1A,LAP3,EPSTI1,B2M,NLRC5,SOD2,PTPN1,TXNIP,IL4R,CASP4,PLSCR1,PFKP,HLA-A,IL10RA,IFNAR2,FPR1,IL15,IRF8,HLA-DRB1,TRIM14,BST2,CASP1,MTHFD2,RIPK2,NFKB1,BTG1,TDRD7,PTPN2,FGL2,TRIM25,CDKN1A,TNFAIP3,EIF2AK2,ADAR,TAPBP,IRF2
KEGG_GLYCOLYSIS_GLUCONEOGENESIS	0.00661405	0.0231492	0.407018	-0.709656	-1.35536	36	5	2.17953	1.63546	PGK1,LDHA,PKM,GPI,GAPDH,HK2,ENO1,PFKP
KEGG_RIBOSOME	5.8183e-19	3.25825e-17	1.12391	-0.874172	-1.72251	81	5	18.2352	16.487	RPS8,RPL37A,RPLP1,RPS27,RPL11,RPL28,RPL13A,RPS27A,RPS3,RPL37,RPLP2,RPL23,RPS28,RPS19,RPS12,RPL34,RPL27A,RPS6,RPL7A,RPL32,RPL10,RPS15,RPS9,RPL36,RPS23,RPL31,RPL19,RPS18,RPL3,RPL6,RPS24,RPS16,RPS2,RPL35,RPL18,RPL13,RPS25,RPL41,RPS29,RPL8,RPL21,RPS20,RPS17,RPL24,RPL12,RPS11,RPL30,RPL10A,RPL35A,RPL38,FAU,RPS7,RPL23A,RPL18A,RPL27,RPL5,RPL15,RPS3A,RPLP0,RPL9,RPS5,RPSA,RPS4Y1,RPS15A,RPS13,UBA52
KRAS Signaling Up	0.00331133	0.0154529	0.431708	-0.631991	-1.25301	102	5	2.48	1.81099	ERO1A,GPNMB,LCP1,LY96,ITGB2,IL10RA,TMEM176B,ZNF277,SPP1,CTSS,MAFB,IRF8,LAPTM5,FCER1G,GLRX,TNFAIP3,GYPC,F13A1,ATG10,MMD,PPP1R15A,C3AR1,NIN,ADAM17,NRP1,CXCR4,TOR1AIP2,CD37,STRN,PRDM1,PECAM1,CBR4,MTMR10,RGS16,CCSER2
Myc Targets V1	0.00137141	0.0076799	0.45506	-0.594396	-1.19365	184	5	2.86283	2.11464	PGK1,LDHA,RPS3,RPL34,RPS6,HSP90AB1,DEK,RPL6,RPS2,RPL18,CANX,VDAC1,HSPD1,AP3S1,DHX15,IFRD1,UBA2,EIF4G2,KPNB1,RPLP0,NAP1L1,PTGES3,GSPT1,CCT3,RAD23B,RACK1,CCT4,RPS5,PSMD14,PSMD1,CCT5,HPRT1,CNBP,TCP1,PCBP1,HDAC2,SYNCRIP,HNRNPR,EEF1B2,HNRNPA1,ABCE1,DDX21,SRSF3,SERBP1,RPL14,LSM7,RPL22,SSBP1,HNRNPD,CLNS1A,VDAC3,SET,EIF4E,ETF1,G3BP1,NCBP1,CUL1,TXNL4A,EIF3J,NPM1
Protein Secretion	0.00301535	0.0153509	0.431708	-0.647539	-1.27685	83	5	2.52066	1.81387	IGF2R,SNAP23,TMX1,SEC24D,CLCN3,ABCA1,AP3S1,ATP7A,SCAMP1,STX12,GALC,AP1G1,ARFGAP3,RAB5A,ATP6V1H,TMED10,RAB14,CTSC,RAB22A,DNM1L,GBF1,COPB1,M6PR,STAM,BET1,USO1,AP2B1,CD63,COG2,LMAN1,CLTC,SEC22B,PAM,VPS45,ARF1,ARFGEF2,VPS4B,LAMP2,KIF1B,OCRL,CLTA,ICA1,RAB9A,TMED2,SNX2,TPD52,SCRN1,NAPG,ATP1A1,MAPK1,COPB2,YIPF6,SEC31A,TSG101,VAMP3,PPT1,ARCN1,AP2M1
TNF-alpha Signaling via NF-kB	8.6297e-05	0.000966526	0.538434	-0.655197	-1.30562	130	5	4.064	3.01479	BCL6,NAMPT,SLC2A3,MAP3K8,DUSP1,TNFAIP8,SOD2,ETS2,KLF6,PNRC1,KYNU,MCL1,VEGFA,ABCA1,RIPK2,SQSTM1,NFKB1,TLR2,BTG1,CCNL1,CDKN1A,NFIL3,TNFAIP3,BTG2,CEBPB,MXD1,B4GALT5,B4GALT1,TNIP1,CEBPD,FOS,PPP1R15A,ZFP36,PLEK,NINJ1,BIRC2,LITAF,SMAD3
UV Response Up	0.0163715	0.0539296	0.352488	-0.60416	-1.19783	102	5	1.78591	1.26817	MGAT1,DNAJA1,ATP6V1C1,DNAJB1,HMOX1,SOD2,RAB27A,CREG1,NUP58,STIP1,TMBIM6,SQSTM1,BTG1,TFRC,BTG2,FKBP4,AMD1,FOS,DDX21,TGFBRAP1,AGO2,EIF5,EIF2S3,ALDOA
Unfolded Protein Response	0.00635793	0.0231492	0.407018	-0.622988	-1.2324	96	5	2.19668	1.63546	HSP90B1,SLC7A5,ERO1A,EDEM1,RPS14,DDIT4,HSPA5,DNAJC3,SPCS3,SERP1,PDIA6,VEGFA,BAG3,CALR,MTHFD2,HERPUD1,NABP1,DCP2,EIF4A2,CEBPB,YWHAZ,HSPA9,SSR1,EIF2AK3,DCP1A,TTC37,DNAJA4,WIPI1,EIF4E,SLC1A4,KIF5B,NPM1,ERN1,NFYA
mTORC1 Signaling	2.4532e-08	6.86896e-07	0.733762	-0.681836	-1.36747	168	5	7.61027	6.16311	PGK1,NAMPT,SLC2A3,LDHA,LGMN,HSP90B1,BCAT1,PDK1,SLC7A5,ERO1A,EDEM1,ITGB2,GPI,GAPDH,HK2,DDIT4,ENO1,HSPA5,ELOVL5,HSPA4,CANX,ATP2A2,SERP1,STIP1,HSPD1,CACYBP,CALR,CCT6A,MTHFD2,SQSTM1,GGA2,IFRD1,PPA1,IDH1,FGL2,GLRX,CDKN1A,PSMD14,NFIL3,LTA4H,TFRC,PITPNB,BTG2,HPRT1,UFM1,ACSL3,CTSC,GBE1,PPP1R15A,TBK1,UCHL5,HSPA9,SSR1,M6PR,GTF2H1,DAPP1,DHFR,SLC2A1,CXCR4,USO1,ACACA
KEGG_RIBOSOME	4.98587e-07	2.74223e-05	0.659444	0.983685	1.1097	80	6	6.30226	4.5619	RPL32,RPS27,RPS23,RPL38,RPL23A,RPLP2,RPL23,UBA52,RPL37,RPS13,RPL19,RPS25,RPL27A,RPS4X,RPL12,RPL34,RPS20,RPL35A,RPS21,RPS11,RPS24,RPL27,RPL11,RPS18,RPL37A,RPS8,RPS6,RPLP1,RPL30,RPS27A,RPS12,RPL29,RPL7,RPL24,RPS3A,RPL14,FAU,RPL8,RPS15,RPL36,RPS17,RPL35,RPL31,RPL21,RPS16,RPS15A,RPL10,RPS7,RPL6,RPL9,RPL13A,RPL28,RPL13,RPL5,RPS3,RPL3,RPL18A,RPL41,RPL22,RPS19,RPL10A,RPS2,RPL7A,RPS29,RPL15,RPL36AL,RPS28…
KEGG_RIBOSOME	0.000247911	0.013883	0.498493	-0.922878	-1.87917	76	8	3.6057	1.85752	RPS27,RPLP2,RPS18,RPL32,RPL19,RPS12,RPL10,RPS2,RPLP1,RPL30,RPS27A,RPS11,RPL3,RPL23A,RPL11,RPL5,RPL34,RPS4X,RPL13,RPS25,RPS23,RPS15,RPL27A,RPS20,FAU,RPL21,RPL14,RPL12,RPL38,RPL23,RPL15,RPS6,RPS13,RPL8,RPS8,RPL41,RPL13A,RPS3A,RPL6,RPL37A,RPL35A,RPL24,RPL10A,RPL29,RPL9,RPS24,RPL7,RPS21,RPL18A,RPL28,RPS7,RPL35,RPL37,UBA52,RPL7A,RPL18,RPS28,RPL36,RPS16,RPL27,RPS3,RPL22,RPS15A,RPS9,RPS17,RPS19
Fatty Acid Metabolism	0.0187715	0.1314	0.352488	0.859797	1.31462	58	2B	1.7265	0.881403	ACSL1,HSP90AA1,GLUL,LDHA,HSPH1,ENO2,HSD17B4,GABARAPL1,GPD2,ALDOA,HSDL2
Glycolysis	0.00031556	0.00589045	0.498493	0.891274	1.38087	84	2B	3.50092	2.22985	PGK1,P4HA1,DDIT4,CXCR4,ZNF292,ERO1A,LDHA,VEGFA,MXI1,ENO1,FAM162A,SAP30,PFKP,PKM,HK2,ENO2,SLC16A3,PPFIA4,PDK3,IRS2,AK4,SDC2,ANKZF1,TGFBI,GYS1,P4HA2
Hypoxia	9.35677e-06	0.000523979	0.593325	0.90257	1.431	116	2B	5.02887	3.28069	DUSP1,SLC2A3,BNIP3L,PGK1,FOSL2,P4HA1,DDIT4,GBE1,CXCR4,ZNF292,ERO1A,LDHA,PFKFB3,VEGFA,RBPJ,MXI1,PDK1,ENO1,NEDD4L,FAM162A,PLIN2,SAP30,FOS,KDM3A,PFKP,GPI,SLC2A1,PPP1R15A,PLAUR,HK2,ENO2,ZFP36,PPFIA4,PDK3,PGM1,SERPINE1,NFIL3,IRS2,BTG1,ADM,CCNG2,BHLHE40,AK4,NDRG1,HMOX1,SDC2,ANKZF1,PNRC1,TGFBI,GYS1,P4HA2,KLHL24,CDKN1A,GAPDH,PLAC8,SLC2A5,PDGFB,WSB1,PFKL,ERRFI1,ALDOA,UGP2,TPI1,XPNPEP1
Inflammatory Response	0.00245938	0.0275451	0.431708	0.875348	1.36039	86	2B	2.60917	1.55996	NAMPT,RGS1,TNFRSF1B,RNF144B,HIF1A,CD55,PLAUR,PDE4B,GPR183,IL10RA,MXD1,IL15,SERPINE1,RIPK2,ADM,MSR1,NOD2,C5AR1,CDKN1A,FPR1,IL4R
KEGG_GLYCOLYSIS_GLUCONEOGENESIS	0.0296375	0.16597	0.352488	0.915198	1.32851	24	2B	1.52816	0.779971	PGK1,LDHA,ENO1,PFKP,PKM,GPI,HK2,ENO2,PGM1,ALDH2,GAPDH,PFKL,ALDOA,TPI1
Myc Targets V1	0.0253091	0.157479	0.352488	0.830748	1.29703	89	2B	1.59672	0.802777	PGK1,LDHA,PTGES3,HSP90AB1,CUL1,HNRNPU,DEK,AP3S1,HSPD1,UBA2
Oxidative Phosphorylation	0.0355913	0.181192	0.257206	0.843019	1.29456	64	2B	1.44866	0.741861	LDHA,GPI,RHOT1,HSPA9
TNF-alpha Signaling via NF-kB	0.000986623	0.0138127	0.45506	0.87005	1.36685	100	2B	3.00585	1.85972	DUSP1,SLC2A3,NAMPT,FOSL2,PFKFB3,VEGFA,CEBPD,FOS,SGK1,TNFAIP8,PPP1R15A,PLAUR,REL,PDE4B,GPR183,DENND5A,MXD1,ZFP36,BCL6,SERPINE1,NFIL3,IRS2,BTG1,RIPK2,MCL1,LITAF,BHLHE40,IER5,NR4A3,PNRC1,PER1,TNIP1,MAP3K8,CDKN1A,SAT1
Unfolded Protein Response	0.0122978	0.0983824	0.38073	0.89846	1.34598	41	2B	1.91017	1.00708	SLC7A5,DDIT4,ERO1A,VEGFA,EDEM1,BAG3
mTORC1 Signaling	5.24574e-05	0.00146881	0.557332	0.898495	1.4096	101	2B	4.28019	2.83304	SLC7A5,SLC2A3,NAMPT,PGK1,P4HA1,DDIT4,GBE1,CXCR4,ERO1A,LDHA,PDK1,ENO1,BCAT1,GPI,SLC2A1,PPP1R15A,HK2,PGM1,EDEM1,NFIL3,NUPR1,TFRC,BHLHE40,SLA,AK4,GGA2
p53 Pathway	0.0120056	0.0983824	0.38073	0.852068	1.32285	85	2B	1.92062	1.00708	DDIT4,ALOX15B,FAM162A,FOS,PPP1R15A,MXD1,BTG1,NUPR1,IER5,NDRG1,HMOX1,CDKN1A,SAT1,VDR,RXRA,RGS16,ZBTB16,BAIAP2,RALGDS,ATF3,JUN,TXNIP,BTG2

## Sheet: GSEA per cluster_per donor
pathway	pval	padj	log2err	ES	NES	size	group	-log10(pval)	-log10(padj)	Genes
Interferon Alpha Response	0.00150113	0.0528242	0.45506	-0.882804	-1.54767	43	0_NBB_AD34_HIP	2.82358	1.27717	LPAR6,PLSCR1,EPSTI1,LAP3,TRIM5,PARP9,PARP14,CD74,SAMD9L,IFI44,IL4R,DDX60,HLA-C,PSMA3,B2M
Interferon Gamma Response	0.00262246	0.0528242	0.431708	-0.813395	-1.53569	87	0_NBB_AD34_HIP	2.58129	1.27717	PLSCR1,EPSTI1,LAP3,XAF1,PARP14,FCGR1A,CD74,PLA2G4A,SAMD9L,HLA-DRB1,CIITA,PTPN2,PTPN1,IFI44,HLA-B,IL4R,MTHFD2,FGL2,DDX60,PSMA3,B2M,PDE4B,SSPN
KEGG_RIBOSOME	0.00907895	0.127105	0.38073	-0.821729	-1.50461	64	0_NBB_AD34_HIP	2.04196	0.895836	RPS24,RPL37A,RPS25,RPL10,RPS2,RPLP1,RPL3,RPL15,RPS12,RPS18,RPL38,RPL9,FAU,RPS7,RPL24,RPS27,RPL18,RPL35,RPL5,RPL14,RPL30,RPS23,RPS9,RPL27A,RPL37,RPL23,RPL32,RPL10A,RPL41,RPS8,RPL11,RPS20,RPL35A,RPL21,RPL34,RPS19,RPLP0,RPS3,RPS11,RPL19,RPL28,RPL7A,RPL6,RPL7,RPLP2,RPS27A,RPL31,RPL13,RPSA,RPS15
Spermatogenesis	0.00282987	0.0528242	0.431708	-0.909195	-1.5041	27	0_NBB_AD34_HIP	2.54823	1.27717	SLC2A5,SPATA6
Adipogenesis	0.00178888	0.0702787	0.45506	0.881253	1.48517	97	0_NBB_AD52_HIP	2.74742	1.15318	PPARG,BCL6,LPL,APOE,MAP4K3,YWHAG
Apoptosis	0.00509509	0.0702787	0.407018	0.881022	1.45769	74	0_NBB_AD52_HIP	2.29285	1.15318	DPYD,DNAJC3,DNAJA1,HSPB1,IGF2R
Cholesterol Homeostasis	0.0373027	0.230769	0.282013	0.916739	1.43426	29	0_NBB_AD52_HIP	1.42826	0.636822	PPARG,LPL,ALCAM,PLAUR
Fatty Acid Metabolism	0.00595292	0.0702787	0.407018	0.888708	1.46108	63	0_NBB_AD52_HIP	2.22527	1.15318	ACSL1,PTPRG,HSPH1,HSP90AA1,ELOVL5,ACADVL
IL-2/STAT5 Signaling	0.00627488	0.0702787	0.407018	0.860348	1.43562	92	0_NBB_AD52_HIP	2.20239	1.15318	MYO1E,SPP1,ALCAM,P4HA1,KLF6,PIM1,CDCP1,CD83,IGF2R,TWSG1,RRAGD,NFKBIZ,ITGAV
KEGG_HUNTINGTONS_DISEASE	0.00275329	0.0702787	0.431708	0.911892	1.50337	70	0_NBB_AD52_HIP	2.56015	1.15318	PPARG,MT-ATP6,MT-CO2,GNAQ,MT-CYB,MT-CO3,PPID
KEGG_OXIDATIVE_PHOSPHORYLATION	0.021301	0.198809	0.352488	0.887771	1.44045	52	0_NBB_AD52_HIP	1.6716	0.701564	MT-ND3,MT-ATP6,MT-CO2,MT-ND4,MT-CYB,MT-CO3,MT-ND2,MT-ND5,MT-ND4L
KEGG_PARKINSONS_DISEASE	0.0465116	0.230769	0.245042	0.875207	1.41796	50	0_NBB_AD52_HIP	1.33244	0.636822	MT-ND3,MT-ATP6,UBE2J1,MT-CO2,MT-ND4,MT-CYB,MT-CO3,MT-ND2,MT-ND5,MT-ND4L,PPID,UBE2G2
Mitotic Spindle	0.04914	0.230769	0.224966	0.808285	1.38008	128	0_NBB_AD52_HIP	1.30856	0.636822	MYO1E,FARP1,NCK2,SSH2,ARHGAP10,FGD4,NOTCH2,LRPPRC,RASA1
UV Response Dn	0.0407895	0.230769	0.257206	0.85874	1.41574	70	0_NBB_AD52_HIP	1.38945	0.636822	PPARG,CACNA1A,PRKCE,SLC7A1,SMAD3,ANXA2,SDC2,KCNMA1,RUNX1,NFKB1,ATXN1,NOTCH2,VAV2
Fatty Acid Metabolism	0.00425031	0.119009	0.407018	0.852464	1.45968	65	0_NBB_AD52_SPG	2.37158	0.924421	ACSL1,HSPH1,PTPRG,HSP90AA1,ELOVL5,LDHA,LGALS1,HIBCH
Glycolysis	0.0136418	0.190985	0.38073	0.793168	1.38547	85	0_NBB_AD52_SPG	1.86513	0.719002	P4HA1,HSPA5,PYGL,PKM,PFKP,PGK1,FKBP4,DDIT4,SLC16A3,LDHA,ZNF292,HS2ST1,GALK2,PGAM1,SDC2,VEGFA,ENO1,SAP30,PMM2,GLRX,TGFBI,UGP2,PPP2CB,GALE
IL-2/STAT5 Signaling	0.0222268	0.24894	0.352488	0.779798	1.36953	94	0_NBB_AD52_SPG	1.65312	0.603906	SPP1,MYO1E,P4HA1,PIM1,IL4R,PLSCR1,CTSZ,IGF2R,KLF6,SLC1A5,NFKBIZ,CD81,GPR65,TNFRSF1B,ALCAM,IFITM3,SLC2A3,IL10RA
Interferon Gamma Response	0.0133081	0.190985	0.38073	0.786499	1.40915	113	0_NBB_AD52_SPG	1.87588	0.719002	ARID5B,PTPN2,FCGR1A,LAP3,PIM1,LCP2,PFKP,BST2,IFNAR2,IL4R,IL15,PLSCR1,HLA-B,CASP4,NAMPT,FPR1,NFKB1,STAT3,NLRC5,EPSTI1,SOD2,HIF1A,PTPN1,MTHFD2,OGFR,TRIM14,IFITM3,IL10RA,TNFAIP3,CDKN1A,HLA-A,PDE4B,SPPL2A,VAMP8,CASP7
mTORC1 Signaling	0.00331053	0.119009	0.431708	0.801568	1.44522	122	0_NBB_AD52_SPG	2.4801	0.924421	P4HA1,HSPA5,HSP90B1,SLC7A5,CALR,SKAP2,PGK1,ATP2A2,HSPD1,ELOVL5,DDIT4,NAMPT,CANX,PPA1,SLA,PSMD14,EDEM1,CACYBP,STIP1,LDHA,SLC1A5,ITGB2,HSPA4,MTHFD2,UBE2D3,HSPA9,ENO1,SLC2A3,USO1,ACACA,GPI,CDKN1A,GLRX,BCAT1,CCT6A,DDIT3,PITPNB,XBP1,SDF2L1,TFRC,EIF2S2
Coagulation	0.00848353	0.188642	0.38073	0.920858	1.48979	34	0_NBB_AD53_HIP	2.07142	0.724362	A2M,OLR1,KLF7,PLEK,PDGFB
Fatty Acid Metabolism	0.0101058	0.188642	0.38073	-0.889556	-1.57899	64	0_NBB_AD53_HIP	1.99543	0.724362	HSP90AA1,HSPH1,ACSL1,ELOVL5
mTORC1 Signaling	0.00682544	0.188642	0.407018	-0.843323	-1.57071	108	0_NBB_AD53_HIP	2.16587	0.724362	P4HA1,STIP1,PGK1,PDK1,DDIT4,ELOVL5,SLC7A5,NAMPT,GAPDH,HSPD1,HSPA5,ENO1,GPI,HSPA4,UBE2D3,HK2
Adipogenesis	0.0330138	0.205419	0.257206	-0.665149	-1.30639	73	1_NBB_AD34_HIP	1.4813	0.687358	BCL6,NABP1,DNAJC15,YWHAG,PFKFB3,GPD2,ITSN1,ATL2,PPM1B,GBE1,UBC,APLP2,AK2,IMMT,APOE,ELMOD3,IFNGR1,ADIPOR2,PDCD4,REEP5,CMPK1
Complement	0.013941	0.115475	0.38073	-0.679958	-1.33815	76	1_NBB_AD34_HIP	1.8557	0.937512	PLSCR1,OLR1,C1QC,LIPA,C1QA,ZEB1,CEBPB,CTSC,ADAM9,LAP3,CTSB,GRB2,GPD2,GCA,USP16,XPNPEP1,AKAP10,GNAI3,PLA2G4A,CPQ,CALM1,CBLB,ANXA5,USP14,PLEK,KIF2A,CD46,HSPA1A
Epithelial Mesenchymal Transition	0.0218838	0.153187	0.352488	-0.77786	-1.38374	26	1_NBB_AD34_HIP	1.65988	0.814779	SAT1,ITGB5,ITGB1,DST,BASP1,TPM1,COPA,PMEPA1
Interferon Alpha Response	0.00423591	0.0593027	0.407018	-0.778103	-1.42595	35	1_NBB_AD34_HIP	2.37305	1.22693	PLSCR1,EPSTI1,LPAR6,B2M,PARP14,LAP3,TRIM5,CD47,SAMD9L,PARP9,DDX60,IL4R,PARP12,PNPT1,ADAR
Interferon Gamma Response	0.0144344	0.115475	0.38073	-0.692667	-1.35704	72	1_NBB_AD34_HIP	1.8406	0.937512	PLSCR1,EPSTI1,SAMHD1,XAF1,B2M,PARP14,PTPN2,LAP3,IFNAR2,HLA-B,PTPN1,ST3GAL5,HLA-DRB1,IL10RA,SAMD9L,DDX60,IL4R,NOD1,PARP12,PNPT1,PLA2G4A,ADAR
KEGG_RIBOSOME	0.000364618	0.0204186	0.498493	-0.824748	-1.51551	36	1_NBB_AD34_HIP	3.43816	1.68997	RPS24,RPL5,RPL37,RPLP2,RPL10,RPL34,RPL37A,RPS2,RPS8,RPS6,RPS18,RPL28,RPS9,RPL13A,RPS3,RPLP1,RPS20,RPS27A,RPL11,RPL13,RPL6
Myogenesis	0.0109933	0.115475	0.38073	-0.770521	-1.38696	30	1_NBB_AD34_HIP	1.95887	0.937512	ITGB5,EIF4A2,NAV2,IFRD1,TPM3,ITGB1,BIN1
TNF-alpha Signaling via NF-kB	0.000759864	0.0212762	0.477271	-0.768104	-1.48252	58	1_NBB_AD34_HIP	3.11926	1.67211	SAT1,BCL6,OLR1,MARCKS,KLF6,IL18,SGK1,CEBPB,ETS2,CEBPD,BTG2,PFKFB3,ATP2B1,MAP3K8
Unfolded Protein Response	0.00356499	0.0593027	0.431708	-0.773743	-1.4359	40	1_NBB_AD34_HIP	2.44794	1.22693	NABP1,EIF4A2,HSP90B1,DDIT4,CEBPB,SEC11A,DCP2,SEC31A,ERO1A,EIF4E,FUS,HERPUD1,SPCS3,DNAJC3,SERP1
Apoptosis	0.0243764	0.227513	0.352488	0.812469	1.52371	60	1_NBB_AD52_HIP	1.61303	0.642993	DPYD,HSPB1,IGF2R,DNAJC3,DNAJA1,PTK2,CASP4
Coagulation	0.0121964	0.227513	0.38073	-0.841732	-1.45635	28	1_NBB_AD52_HIP	1.91377	0.642993	HTRA1,A2M,OLR1,PECAM1,CPQ,C1QA,RAC1,PLEK
Fatty Acid Metabolism	0.0209068	0.227513	0.352488	0.873502	1.56891	50	1_NBB_AD52_HIP	1.67971	0.642993	HSP90AA1,ACSL1,HSPH1,PTPRG,ELOVL5
KEGG_OXIDATIVE_PHOSPHORYLATION	0.00543774	0.152257	0.407018	0.872423	1.52532	39	1_NBB_AD52_HIP	2.26458	0.817423	MT-ND3,MT-ATP6,MT-ND4,MT-CO2,PPA1,MT-CO3,MT-CYB
KEGG_PARKINSONS_DISEASE	0.019668	0.227513	0.352488	0.875846	1.51924	36	1_NBB_AD52_HIP	1.70624	0.642993	MT-ND3,MT-ATP6,MT-ND4,MT-CO2,MT-CO3,MT-CYB,MT-ND4L,PPID,UBE2G2
KEGG_RIBOSOME	0.000120785	0.00676394	0.538434	-0.871008	-1.65734	61	1_NBB_AD52_HIP	3.91799	2.1698	RPL10,RPS2,RPS20,RPL13A,RPL3,RPL15,RPL21,RPS12,RPL13,RPLP1,RPL32,RPS11,RPS18,RPL7A,RPL8,RPL34,FAU,RPL36,RPS27A,RPS28,RPS25,RPS7,RPS27,RPLP2,RPS16,RPS6,RPL23A,RPL11,RPL27A,RPS8,RPL18,RPS3A,RPL14,RPS15,RPL27,RPL35,RPLP0,RPL23,RPL6,RPL35A,RPL37A,RPL30,UBA52,RPS17,RPS3,RPL10A,RPL5
Fatty Acid Metabolism	0.000148078	0.00829239	0.518848	0.941634	1.53359	56	1_NBB_AD52_SPG	3.82951	2.08132	HSP90AA1,ACSL1,HSPH1,ELOVL5,LDHA,CPT1A,GLUL,ACSL4
mTORC1 Signaling	0.000333834	0.00934735	0.498493	0.87292	1.49717	122	1_NBB_AD52_SPG	3.47647	2.02931	P4HA1,PPA1,PGK1,DDIT4,SLC7A5,ELOVL5,PDK1,LDHA,SLC2A3,GPI,SLC2A1,SLA,ENO1,PGM1,HSPD1,GGA2,HK2,BCAT1,UBE2D3,HSPA5,HSP90B1,SKAP2,CACYBP,STIP1,HSPA4,ERO1A,GAPDH,PPP1R15A,LDLR,EDEM1,TPI1,SERPINH1,HPRT1,HSPA9,CTSC,GBE1,CDKN1A,ACACA,SCD,NAMPT,GLRX,ELOVL6
Fatty Acid Metabolism	3.45674e-05	0.00193578	0.557332	-0.959421	-1.69012	59	1_NBB_AD53_HIP	4.46133	2.71314	HSP90AA1,HSPH1,ACSL1
Myc Targets V1	0.0132208	0.246789	0.38073	-0.799047	-1.45839	120	1_NBB_AD53_HIP	1.87874	0.607675	PTGES3,HSP90AB1,PGK1,HSPD1,XPO1,RPS6,CCT3,CCT4,PCBP1,HPRT1,VDAC1,CUL1,TCP1,AP3S1,CCT5
mTORC1 Signaling	0.0012663	0.0354564	0.45506	-0.880101	-1.56955	102	1_NBB_AD53_HIP	2.89746	1.45031	P4HA1,STIP1,PGK1,PDK1,DDIT4,HSPD1,SLC7A5,NAMPT,GPI,GAPDH,BCAT1,ELOVL5,ENO1,HSPA4,ERO1A,UBE2D3,HSPA5
Complement	0.0110495	0.154693	0.38073	-0.735704	-1.43369	79	10_NBB_AD34_HIP	1.95666	0.810529	HSPA1A,OLR1,LAP3,GCA,C1QC,PLSCR1,CEBPB,GRB2,PLA2G4A,GPD2,ZEB1,C3,CTSB,ADAM9,CALM1,C1QA,KYNU,LIPA,CBLB,L3MBTL4,SERPINE1
Interferon Alpha Response	0.00499804	0.0932967	0.407018	-0.849186	-1.52415	35	10_NBB_AD34_HIP	2.3012	1.03013	EPSTI1,IL4R,LAP3,SAMD9L,PLSCR1,PARP14,B2M,CD74,TRIM5,PARP9,ADAR,EIF2AK2,HLA-C,LPAR6,DDX60,PARP12,TDRD7
Interferon Gamma Response	0.000630007	0.0176402	0.477271	-0.791318	-1.54004	78	10_NBB_AD34_HIP	3.20065	1.7535	EPSTI1,IL4R,LAP3,PDE4B,HLA-DRB1,SAMD9L,PLSCR1,PARP14,B2M,CD74,PTPN2,PLA2G4A,PTPN1,XAF1,ARID5B,MTHFD2,ADAR,EIF2AK2,FGL2,CIITA,HLA-B,NUP93,SAMHD1,FCGR1A,STAT1,DDX60,PARP12,BTG1,TDRD7
KEGG_RIBOSOME	8.50969e-05	0.00476543	0.538434	-0.862668	-1.59916	51	10_NBB_AD34_HIP	4.07009	2.3219	RPL3,RPS24,RPS9,RPL28,RPS2,RPS12,RPL37A,RPL10,RPS27,RPS15,RPL18,RPL35,RPS3,RPL5,RPS27A,RPL34,RPS6,RPS19,RPL32,RPL27A,RPL30,RPLP2,RPL11,RPS20,RPL38,RPS28,RPL6,RPL7A,RPS7,RPS23,RPL31,RPL37,RPSA,RPL36,RPLP0,RPL21,RPL14,RPL12,RPL13,RPS16,RPS8
KEGG_ALZHEIMERS_DISEASE	0.00329289	0.0368804	0.431708	0.902977	1.57645	56	10_NBB_AD52_HIP	2.48242	1.4332	MT-ATP6,MT-CO3,MT-CYB,MT-CO2,ATP2A2,MT-CO1,GNAQ
KEGG_HUNTINGTONS_DISEASE	0.000102474	0.00286926	0.538434	0.930093	1.65113	62	10_NBB_AD52_HIP	3.98939	2.54223	MT-ATP6,MT-CO3,MT-CYB,MT-CO2,PPARG,MT-CO1,GNAQ
KEGG_OXIDATIVE_PHOSPHORYLATION	4.2242e-06	0.000236555	0.610527	0.965901	1.66504	46	10_NBB_AD52_HIP	5.37426	3.62607	MT-ND3,MT-ATP6,MT-ND4,MT-CO3,MT-CYB,MT-CO2,MT-ND1,MT-ND2,MT-ND5,MT-ND4L,MT-CO1
KEGG_PARKINSONS_DISEASE	0.00169684	0.0237558	0.45506	0.935246	1.61246	41	10_NBB_AD52_HIP	2.77036	1.62423	MT-ND3,MT-ATP6,MT-ND4,MT-CO3,MT-CYB,MT-CO2,MT-ND1,MT-ND2,MT-ND5,UBE2J1,MT-ND4L,MT-CO1
KEGG_RIBOSOME	0.000705231	0.0131643	0.477271	-0.861556	-1.62322	71	10_NBB_AD52_HIP	3.15167	1.8806	RPL11,RPS18,RPLP2,RPS23,RPL3,RPL32,RPS11,RPS25,RPL19,RPL6,RPL37A,RPL23,RPL35A,RPS12,RPL30,RPL21,RPL38,RPS2,RPS27,FAU,RPL23A,RPS27A,RPL14,RPL24,RPL34,RPL15,RPS9,RPS6,RPL37,RPS15,RPL41,RPL10,RPL8,RPL27A,RPL18A,RPL5,RPL7,RPL29,RPS20,RPLP1,RPS27L,RPL13A,UBA52,RPS24,RPL4,RPS16,RPL12
Coagulation	0.00977044	0.215774	0.38073	0.907213	1.46622	30	10_NBB_AD53_HIP	2.01009	0.666001	A2M,OLR1,KLF7,PLEK
Fatty Acid Metabolism	0.00471698	0.215774	0.407018	-0.925296	-1.61349	58	10_NBB_AD53_HIP	2.32634	0.666001	HSP90AA1,ACSL1,HSPH1
KRAS Signaling Dn	0.0124674	0.215774	0.38073	0.896401	1.43001	26	10_NBB_AD53_HIP	1.90423	0.666001	GRID2,PTPRJ,TG
mTORC1 Signaling	0.0154124	0.215774	0.38073	-0.833615	-1.53217	100	10_NBB_AD53_HIP	1.81213	0.666001	P4HA1,PGK1,PDK1,SLC7A5,DDIT4,HSPA4,HSPD1,ERO1A,ELOVL5,GPI,HK2,EDEM1,CACYBP,ENO1,GAPDH,MTHFD2,HSPA9
Adipogenesis	0.0375783	0.191308	0.237794	-0.606945	-1.24075	56	11_NBB_AD34_HIP	1.42506	0.718268	APOE,NABP1,GPD2,UBC,APLP2,PFKFB3,MCCC1,RIOK3,IMMT,DNAJC15,BCL2L13,SCP2,SDHC,STOM,ATL2,ALDH2,CMPK1,PPM1B,YWHAG,GBE1,PEX14,G3BP2,PDCD4,DECR1,BAZ2A,ATP1B3,AGPAT3
Allograft Rejection	0.0130399	0.0811371	0.38073	-0.631294	-1.29052	56	11_NBB_AD34_HIP	1.88473	1.09078	HLA-DRA,B2M,HLA-DMB,ITGB2,IL4R,SRGN,BCAT1,CD4,MRPL3,RPS19,CD74,NCK1,CTSS,TLR2,LCP2,IL18
Apical Junction	0.00945799	0.0811371	0.38073	-0.653168	-1.32447	50	11_NBB_AD34_HIP	2.0242	1.09078	ACTB,ITGA9,ADAM9,MAPK14,PIK3CB,CTNND1,PECAM1,MYH9,CAP1,CD99,ITGB1
Coagulation	0.0107198	0.0811371	0.38073	-0.758553	-1.44726	21	11_NBB_AD34_HIP	1.96981	1.09078	C1QA,ADAM9,OLR1,KLF7,PDGFB,PECAM1,LAMP2,PREP
Complement	0.000893857	0.012514	0.477271	-0.669547	-1.38772	69	11_NBB_AD34_HIP	3.04873	1.9026	C1QC,LAP3,C1QA,ADAM9,PLSCR1,OLR1,KYNU,CEBPB,GPD2,GCA,LIPA,PDGFB,CTSS,LAMP2,LCP2,GNG2,ZEB1,RAF1,CALM1,ITGAM,PREP,CASP10,CBLB,USP14,CD46,CTSC,ANXA5
Glycolysis	0.0437956	0.20438	0.21925	-0.624786	-1.25878	45	11_NBB_AD34_HIP	1.35857	0.689563	PGK1,DDIT4,HDLBP,PYGL,RPE,NASP,NDUFV3,PMM2,SLC35A3,UGP2,ERO1A,ME2,SDHC,GLCE,PKM,AKR1A1,EXT1,GFPT1,KIF2A
Interferon Alpha Response	0.00184648	0.0206806	0.45506	-0.771089	-1.49515	26	11_NBB_AD34_HIP	2.73365	1.68444	LAP3,EPSTI1,TRIM5,B2M,PARP9,IL4R,PLSCR1,SAMD9L,EIF2AK2,CD74,TRIM14
Interferon Gamma Response	1.34428e-05	0.000376398	0.593325	-0.733946	-1.50708	60	11_NBB_AD34_HIP	4.87151	3.42435	FCGR1A,HLA-DRB1,LAP3,EPSTI1,B2M,HLA-B,PTPN1,XAF1,FGL2,IL4R,PLSCR1,SAMD9L,SOD2,EIF2AK2,ST3GAL5,CD74,LCP2,TRIM14
KEGG_RIBOSOME	2.01722e-07	1.12964e-05	0.690132	-0.926733	-1.75023	19	11_NBB_AD34_HIP	6.69525	4.94706	RPS24,RPL37A,RPLP1,RPL10,RPS2,RPL5,RPL11,RPS8,RPL18,RPL13A,RPL13,RPL6,RPL28,RPS28,RPS19,RPL7A
TNF-alpha Signaling via NF-kB	0.000392411	0.00732501	0.498493	-0.727054	-1.46482	45	11_NBB_AD34_HIP	3.40626	2.13519	CEBPD,MAP3K8,OLR1,KYNU,SGK1,CEBPB,SOD2,SAT1,TNFAIP8,PFKFB3,CCNL1,MARCKS,TLR2,IL18
Unfolded Protein Response	0.012338	0.0811371	0.38073	-0.689124	-1.34941	31	11_NBB_AD34_HIP	1.90876	1.09078	EIF4A2,NABP1,HERPUD1,CEBPB,DDIT4,SSR1,DNAJC3,PARN,SEC31A,DDX10,ERO1A,EDEM1,EIF4E,KIF5B,HSPA9,CNOT6,SPCS3
mTORC1 Signaling	0.0270833	0.151667	0.282013	-0.607883	-1.25083	62	11_NBB_AD34_HIP	1.5673	0.81911	PGK1,FGL2,ITGB2,CANX,ATP2A2,USO1,BCAT1,ACSL3,DDIT4,SSR1,NFYC,IMMT,GMPS,ERO1A,EDEM1,NUP205,CTSC,GGA2,HSPA9,HPRT1,HSPD1,GBE1,PSMD14
KEGG_RIBOSOME	2.70236e-05	0.00151332	0.57561	-0.842626	-1.61307	47	11_NBB_AD52_HIP	4.56826	2.82007	RPLP1,RPS27,RPS27A,RPS2,RPL30,RPL32,RPL7A,RPL11,RPL13,RPL10,RPLP2,RPL21,RPL34,RPL13A,RPS3,RPL18,RPS12,RPS6,RPL3,RPS24,RPL19,RPS20,RPL37,RPS28,RPS8,RPL5,RPS19,RPL37A,RPS11,RPL6,RPL27A,RPL14,RPS27L,RPS16,RPL23A
Adipogenesis	0.014058	0.213429	0.38073	0.82489	1.51533	84	11_NBB_AD52_SPG	1.85208	0.670747	BCL6,UBC,PFKFB3,SPARCL1
Fatty Acid Metabolism	0.00133337	0.0746689	0.45506	0.908618	1.57111	51	11_NBB_AD52_SPG	2.87505	1.12686	HSP90AA1,HSPH1,ACSL1,ELOVL5,LDHA,ACSL4
Hypoxia	0.0306883	0.248892	0.352488	0.791664	1.45079	89	11_NBB_AD52_SPG	1.51303	0.603989	P4HA1,PFKFB3,NEDD4L,PGK1,BNIP3L,DDIT4,PFKP,HK2,ZNF292,HMOX1,PDK1,SLC2A5,SLC2A3,PIM1,LARGE1,ENO1,LDHA,RBPJ,GPI,ERO1A,PPP1R15A,CDKN1A,VEGFA,SLC2A1,ETS1,PGM1,FAM162A,TPI1,GLRX,KDM3A,BHLHE40,GBE1
KEGG_RIBOSOME	0.0152449	0.213429	0.38073	-0.727288	-1.49338	72	11_NBB_AD52_SPG	1.81688	0.670747	RPL5,RPS27,RPS18,RPLP2,RPL11,RPS23,RPL32,RPL23,RPL27A,RPL19,RPL21,RPL30,RPS25,RPS11,RPL13,RPL3,RPS12,RPL34,RPS27A,RPL37,RPS8,RPL7A,RPS2,FAU,RPS20,RPL10,RPL15,RPL27,RPS3A,RPL12,RPL35A,RPL23A,RPS17,RPS16,RPS7,RPL10A,RPLP1,RPS27L,RPL8,RPL38,RPL24,RPL35,RPS3,RPL14,RPL18A,UBA52,RPL41,RPL13A,RPL4,RPS21,RPS5,RPL18,RPL31,RPS28,RPS6
KRAS Signaling Dn	0.0105673	0.213429	0.38073	-0.868775	-1.52017	26	11_NBB_AD52_SPG	1.97604	0.670747	GRID2,IFI44L,ZBTB16,SGK1,FGGY
Reactive Oxygen Species Pathway	0.0311115	0.248892	0.352488	0.90595	1.47609	24	11_NBB_AD52_SPG	1.50708	0.603989	IPCEF1,PFKP,MBP,SBNO2,GLRX,SOD2
mTORC1 Signaling	0.0236031	0.248892	0.352488	0.783757	1.47551	111	11_NBB_AD52_SPG	1.62703	0.603989	P4HA1,PGK1,BCAT1,DDIT4,PPA1,HK2,PDK1,SLC2A3,ELOVL5,STIP1,ENO1,LDHA,HSPD1,GPI,ERO1A,PPP1R15A,CDKN1A,STARD4,SLC2A1,PGM1,HPRT1,TFRC,SLC7A5,TPI1,GLRX,BHLHE40,CACYBP,GBE1,UBE2D3,HSPA4,SLA,NAMPT,TES
Bile Acid Metabolism	0.047619	0.222222	0.266351	-0.849092	-1.41473	30	11_NBB_AD53_HIP	1.32222	0.653213	ACSL1,RXRA
Coagulation	0.0165095	0.143809	0.352488	0.875118	1.54317	29	11_NBB_AD53_HIP	1.78227	0.842215	A2M,OLR1,PLEK,KLF7
DNA Repair	0.0179761	0.143809	0.352488	-0.829837	-1.49741	64	11_NBB_AD53_HIP	1.7453	0.842215	PDE4B,HCLS1,SDCBP,HPRT1,ELL,DDB2
Fatty Acid Metabolism	0.00159406	0.0538412	0.45506	-0.906857	-1.57085	50	11_NBB_AD53_HIP	2.7975	1.26889	HSPH1,HSP90AA1,ACSL1,ELOVL5
Hypoxia	0.024009	0.149389	0.352488	-0.821434	-1.48007	63	11_NBB_AD53_HIP	1.61963	0.82568	P4HA1,BNIP3L,DTNA,PDK1,NEDD4L,ZNF292,PGK1,GAPDH,ENO1,GBE1,HSPA5,SAP30,LARGE1,HMOX1,HK2,RBPJ,CCNG2,PDK3,PFKP,KDM3A
Interferon Gamma Response	0.00765923	0.0857833	0.407018	-0.810424	-1.53198	93	11_NBB_AD53_HIP	2.11582	1.0666	PDE4B,HIF1A,NLRC5,PTPN2,CASP4,IL10RA,PLSCR1,LAP3,TRIM14,NAMPT,STAT3,TXNIP,IFNAR2,BST2,RIPK2,PTPN1,HLA-B,RIPK1,EPSTI1,PFKP
KEGG_PARKINSONS_DISEASE	0.0326315	0.182736	0.321776	-0.84881	-1.4593	44	11_NBB_AD53_HIP	1.48636	0.738175	LRRK2,MT-ND3,MT-ND4,MT-ATP6,MT-CO2,VDAC1,MT-ND1,MT-CYB,APAF1,UBE2G2,MT-CO3,MT-ND2,UBA1
KEGG_RIBOSOME	0.0398773	0.203012	0.282013	-0.778825	-1.43296	74	11_NBB_AD53_HIP	1.39927	0.692479	RPS6,RPL31,RPLP1,RPL28,RPL37A,RPL34,RPL35,UBA52,RPL6,RPS28,RPL37,RPS27,RPS20,RPL11,RPS15,RPL14,RPL27,RPL27A,RPL38,RPL19,RPS27A,RPL41,RPS12,RPL29,RPL24,RPSA,RPS15A,RPS7,RPL10,RPL23,RPS24,RPS21,RPS5,RPL10A,RPS19,RPS13,RPL4,RPL23A,RPL13,RPS23,RPL32,RPL8,RPL21,RPS16,RPS8
KRAS Signaling Dn	0.00473895	0.0857833	0.407018	0.928966	1.60753	25	11_NBB_AD53_HIP	2.32432	1.0666	GRID2,PTPRJ,TG
Myc Targets V1	0.0217064	0.149389	0.352488	-0.76612	-1.47443	109	11_NBB_AD53_HIP	1.66341	0.82568	PTGES3,HSP90AB1,PGK1,HSPD1,RPS6,VDAC1,XPO1,CCT3,HPRT1,AP3S1,RPL34,CUL1,NCBP1,RPL6,CLNS1A,NPM1,RPL14
Pperoxisome	0.00627413	0.0857833	0.407018	-0.885372	-1.50189	40	11_NBB_AD53_HIP	2.20245	1.0666	ACSL1,ELOVL5
mTORC1 Signaling	0.0019229	0.0538412	0.45506	-0.832622	-1.58507	96	11_NBB_AD53_HIP	2.71604	1.26889	P4HA1,STIP1,PDK1,PGK1,HSPD1,SLC7A5,ELOVL5,GAPDH,NAMPT,ENO1,GBE1,HSPA5,HSP90B1,HK2,UBE2D3,HPRT1,HSPA4,DHFR,HSPA9,EDEM1
Estrogen Response Late	0.0169822	0.0809678	0.352488	0.702579	1.34134	46	13_NBB_AD52_SPG	1.77001	1.09169	FOS,ATP2B4,ST14,ZFP36,FKBP4,TST,SLC7A5,IMPA2,AFF1,HSPA4L,ABCA3,PDCD4,LARGE1,RAB31,ID2,SCARB1,DYNLT3,NCOR2,SLC2A8,COX6C
Fatty Acid Metabolism	0.0106088	0.0660105	0.38073	0.709802	1.3578	47	13_NBB_AD52_SPG	1.97433	1.18039	HSP90AA1,HSPH1,ACSL1,GLUL,HMGCS1
Glycolysis	0.00397147	0.0317718	0.407018	0.694708	1.36344	71	13_NBB_AD52_SPG	2.40105	1.49796	DDIT4,P4HA1,PGK1,ZNF292,ENO1,PKM,ERO1A,FKBP4,VEGFA,NOL3,PPP2CB,SAP30,CHST1,HK2,TPI1,GLRX,NASP,PDK3
Hypoxia	1.82763e-06	0.000102347	0.643552	0.771891	1.51939	88	13_NBB_AD52_SPG	5.73811	3.98992	SLC2A3,PPP1R15A,DDIT4,PDK1,FOS,PFKFB3,P4HA1,NEDD4L,PGK1,ZNF292,ENO1,ERO1A,JMJD6,BNIP3L,ZFP36,BHLHE40,DUSP1,ATF3,ATP7A,PLIN2,VEGFA,CCNG2,HK1,SAP30,HK2,PLAC8,TPI1,GPI,JUN,GLRX,PDK3
IL-2/STAT5 Signaling	0.000871147	0.0121961	0.477271	0.722496	1.42166	78	13_NBB_AD52_SPG	3.05991	1.91378	SLC2A3,P4HA1,TNFRSF1B,SPP1,IL10RA,BHLHE40,RGS16,IGF2R,MXD1,SPRED2,PLIN2,IL4R,SYNGR2,HK2,RHOB,DHRS3,IKZF2,MAP3K8
Interferon Alpha Response	0.0200152	0.0809678	0.352488	0.689238	1.32523	49	13_NBB_AD52_SPG	1.69864	1.09169	EPSTI1,LAP3,SP110,HLA-C,MX1,IFI27,C1S,IL4R,PARP9,IRF7,IFI35,PSMB9,SELL,SAMD9L,OGFR,B2M,TRIM5,IFITM3
Interferon Gamma Response	0.00271767	0.0253649	0.431708	0.678123	1.33519	92	13_NBB_AD52_SPG	2.5658	1.59577	EPSTI1,IFNAR2,SOCS3,PTPN2,LAP3,SP110,MX1,IL10RA,IFI27,C1S,HIF1A,IL4R,HLA-B,IRF7,PTPN1,CD69,PFKP,STAT3,PDE4B,IFI35,NFKBIA,RAPGEF6,MX2,PSMB9,ST3GAL5,SAMD9L,OGFR,B2M,TNFSF10
KEGG_GLYCOLYSIS_GLUCONEOGENESIS	0.0186285	0.0809678	0.352488	0.788423	1.42671	19	13_NBB_AD52_SPG	1.72982	1.09169	PGK1,ENO1,PKM,HK1,HK2,TPI1,GPI,PFKP,ALDH2,GAPDH,PGM1,ENO2
KRAS Signaling Up	0.0307062	0.114637	0.261664	0.661981	1.28892	59	13_NBB_AD52_SPG	1.51277	0.940677	PPP1R15A,TNFRSF1B,SPP1,LY96,ERO1A,IL10RA,RGS16,TMEM176A,SDCCAG8
Notch Signaling	0.0198132	0.0809678	0.352488	0.808327	1.44279	17	13_NBB_AD52_SPG	1.70305	1.09169	PPARD,NOTCH1,SAP30,TCF7L2,PRKCA,CUL1
TNF-alpha Signaling via NF-kB	2.65881e-05	0.000744466	0.57561	0.77078	1.51481	76	13_NBB_AD52_SPG	4.57531	3.12816	SLC2A3,PPP1R15A,FOS,IER5,PFKFB3,BCL6,SOCS3,CEBPD,TSC22D1,ZFP36,BHLHE40,DUSP1,ATF3,BTG2,MXD1,VEGFA,ETS2,JUN,SPSB1,TNIP1,RHOB,MAP3K8,CD69,MCL1,PDE4B,NFKBIA,PER1,SMAD3
UV Response Up	0.0202419	0.0809678	0.352488	0.698882	1.34859	50	13_NBB_AD52_SPG	1.69375	1.09169	DNAJB1,FOS,DNAJA1,ALAS1,ATF3,FKBP4,BTG2,MGAT1,TST,PPT1,RHOB,PLCL1,HMOX1,NFKBIA
Unfolded Protein Response	0.00545505	0.0381853	0.407018	0.738814	1.40931	45	13_NBB_AD52_SPG	2.2632	1.4181	DDIT4,ERO1A,BAG3,ATF3,VEGFA,SLC7A5,EIF4A1,ATF6,SPCS3,ALDH18A1
mTORC1 Signaling	4.87927e-05	0.000910797	0.557332	0.731495	1.45128	103	13_NBB_AD52_SPG	4.31165	3.04058	SLC2A3,PPP1R15A,DDIT4,PDK1,P4HA1,PGK1,HSPD1,ENO1,BCAT1,ERO1A,BHLHE40,BTG2,HMGCS1,SLC7A5,PPA1,HK2,CACYBP,TPI1,LGMN,HSPE1,GPI,CCT6A,GLRX,INSIG1
p53 Pathway	0.00269656	0.0253649	0.431708	0.716077	1.40501	72	13_NBB_AD52_SPG	2.56919	1.59577	PPP1R15A,DDIT4,FOS,IER5,ST14,NOTCH1,TSC22D1,RGS16,ATF3,BTG2,MXD1,MXD4,HSPA4L,JUN
Hypoxia	0.0133096	0.199534	0.38073	-0.580295	-1.52666	69	13_NBB_AD53_HIP	1.87583	0.699983	DTNA,BNIP3L,ZNF292,LARGE1,DDIT4,P4HA1,RBPJ,UGP2,NEDD4L,GCNT2,CCNG2,PDK1,PFKP,PGK1,GBE1
Inflammatory Response	0.00661367	0.185183	0.407018	0.69778	1.52344	76	13_NBB_AD53_HIP	2.17956	0.7324	RGS1,OLR1,TLR3,HIF1A,LDLR,HPN,CMKLR1,GPR183,FPR1,AXL
KEGG_RIBOSOME	0.0057221	0.185183	0.407018	-0.597479	-1.58179	74	13_NBB_AD53_HIP	2.24244	0.7324	RPL37A,RPS27,RPL32,RPS28,RPS8,RPS20,RPL27A,RPS3,RPL31,RPS11,RPL35,RPS6,RPL18,RPL38,RPL13A,RPL12,RPS29,RPL13,RPS4X,RPLP1,RPLP2,RPL24,RPS13,RPLP0,RPL19,RPL23,RPS25,RPL30
TNF-alpha Signaling via NF-kB	0.0142524	0.199534	0.38073	0.674696	1.47512	79	13_NBB_AD53_HIP	1.84611	0.699983	CD83,SGK1,OLR1,DUSP1,PFKFB3,MARCKS,LITAF,LDLR,CCNL1,SAT1,GPR183,TRIB1,ID2,NFKBIE,EIF1
Apoptosis	0.0361757	0.225093	0.271289	0.80767	1.33801	85	14_NBB_AD52_SPG	1.44158	0.647637	DPYD,SAT1,BNIP3L,IGF2R,TXNIP,MCL1,ANXA1,IFITM3,CASP4,DNAJA1,HSPB1,CD14,SOD2,CTNNB1,PDCD4,GADD45B,RHOB,BTG2,HMGB2,CDKN1A,BMF,CASP1,SPTAN1
Epithelial Mesenchymal Transition	0.016634	0.1863	0.352488	0.887456	1.40902	46	14_NBB_AD52_SPG	1.779	0.729786	TGFBI,SAT1,BASP1,IL15,TNFAIP3,PLAUR,SNTB1,NOTCH2,VEGFA,VIM,ITGB1,GADD45B,RHOB,PPIB,FERMT2
Fatty Acid Metabolism	0.0355263	0.225093	0.276501	0.837941	1.34686	63	14_NBB_AD52_SPG	1.44945	0.647637	ACSL1,HSPH1,GLUL,LDHA,HSP90AA1,GABARAPL1,HSDL2,NBN,GPD2,HSD17B4,CPT1A,SERINC1,ELOVL5,ADIPOR2
Glycolysis	0.00495284	0.138679	0.407018	0.856981	1.4197	85	14_NBB_AD52_SPG	2.30515	0.857988	TGFBI,SAP30,P4HA1,SDC2,IRS2,LDHA,DDIT4,VEGFA,PGK1,PKM,CXCR4,ZNF292,HSPA5,PYGL,FKBP4,TPST1,ERO1A,PDK3,UGP2
Hypoxia	0.0201341	0.187919	0.352488	0.819155	1.3825	104	14_NBB_AD52_SPG	1.69607	0.72603	TGFBI,SAP30,FOSL2,DUSP1,P4HA1,BNIP3L,SDC2,TNFAIP3,IRS2,LDHA,PLAUR,RBPJ,DDIT4,SLC2A3,NFIL3,PFKFB3,TES,BTG1,NEDD4L,ZFP36,VEGFA,PGK1,CXCR4,FOS,PDK1,ZNF292,HSPA5,BHLHE40,KLF6,ERO1A,PNRC1,PPP1R15A,PGM1,PDK3,PLIN2
Inflammatory Response	0.00472435	0.138679	0.407018	0.869772	1.44731	87	14_NBB_AD52_SPG	2.32566	0.857988	NAMPT,RNF144B,MSR1,TNFRSF1B,PDE4B,CD55,C5AR1,HIF1A,RGS1,STAB1,MXD1,IL15,RIPK2,IL10RA,PLAUR,FPR1,BST2,ADGRE1,GPR183,CLEC5A,NOD2,IFNAR1,CD14,IL4R
Interferon Gamma Response	0.0120021	0.181055	0.38073	0.823969	1.40506	118	14_NBB_AD52_SPG	1.92074	0.742189	NAMPT,PLSCR1,PDE4B,HIF1A,IL15,RIPK2,IL10RA,TNFAIP3,TXNIP,HLA-B,FPR1,EPSTI1,BTG1,HLA-A,IFITM3,CASP4,B2M,PTPN2,BST2,PTPN1,IFNAR2,HLA-DRB1,IFITM2,ADAR,SOD2,IL4R,MX2,ARID5B,CIITA,PELI1,STAT3,LAP3,TRIM14,CDKN1A,XAF1,NLRC5,CASP1,IFIH1,IRF7,SOCS3,OGFR,RBCK1,LATS2,IRF2,LYSMD2,OAS2
TNF-alpha Signaling via NF-kB	0.0353535	0.225093	0.271289	0.796297	1.34176	98	14_NBB_AD52_SPG	1.45157	0.647637	NAMPT,SAT1,FOSL2,DUSP1,PDE4B,CEBPD,KYNU,MXD1,TGIF1,RIPK2,TNFAIP3,IRS2,PLAUR,MCL1,SLC2A3,NFIL3,BCL6,DRAM1,REL,MAP3K8,PFKFB3,BTG1,KLF2,ZFP36,LITAF,VEGFA,TNFAIP8,GPR183,FOS,PER1,SOD2,BHLHE40,GADD45B,KLF6,RHOB,PNRC1,PPP1R15A,BTG2,TLR2
mTORC1 Signaling	0.0129325	0.181055	0.38073	0.81937	1.4078	125	14_NBB_AD52_SPG	1.88832	0.742189	NAMPT,SLC7A5,P4HA1,SLA,LDHA,DDIT4,SLC2A3,NFIL3,TES,TFRC,PGK1,CXCR4,CALR,PDK1,LTA4H,HSPA5,BHLHE40,HSP90B1,BCAT1,ERO1A,CACYBP,PPP1R15A,HSPA9,PGM1,BTG2,CDKN1A,HSPD1,HSPA4,IFRD1,CD9,SQSTM1,CCT6A,ELOVL5,PPA1,DDIT3,UBE2D3,ADIPOR2,NUPR1
KEGG_RIBOSOME	0.00104858	0.0587203	0.45506	-0.887181	-1.63528	53	15_NBB_AD34_HIP	2.9794	1.23121	RPS24,RPL10,RPL19,RPL34,RPS27A,RPLP1,RPS8,RPS2,RPL11,RPL12,RPL3,RPS18,RPS27,RPL5,RPL6,RPL28,RPLP2,RPL35,RPS9,RPS6,RPL23,RPL15,RPL14,RPL37,RPS11,RPL30,RPL7A,RPS23,RPS20,RPL37A,RPL13A,RPS28,RPS3,RPL36,RPL24,RPL21,RPS19,RPL8,RPL13,RPS15,RPLP0,RPS17
KEGG_RIBOSOME	8.82063e-07	4.93955e-05	0.659444	-0.884668	-1.96828	75	15_NBB_AD52_HIP	6.0545	4.30631	RPLP2,RPLP1,RPL10,UBA52,RPS3A,RPL19,RPL3,RPL21,RPS23,RPL32,RPS11,RPS27A,FAU,RPL11,RPL34,RPS18,RPS4X,RPS27,RPS8,RPL30,RPL23A,RPL36,RPL23,RPL35A,RPL15,RPS20,RPL27A,RPL18A,RPL24,RPL7,RPS12,RPL13,RPS2,RPL41,RPL38,RPS15A,RPL8,RPS21,RPS25,RPL13A,RPS15,RPL18,RPS7,RPL7A,RPS16
Fatty Acid Metabolism	0.000208845	0.00389845	0.518848	0.917356	1.36893	64	15_NBB_AD52_SPG	3.68017	2.40911	HSP90AA1,ACSL1,HSPH1,GLUL,LDHA,ELOVL5
Glycolysis	0.0164786	0.131829	0.352488	0.853659	1.27822	83	15_NBB_AD52_SPG	1.78308	0.87999	P4HA1,DDIT4,PGK1,ZNF292,LDHA,ENO1,SAP30,PFKP,PKM,ERO1A,SLC16A3,HK2,PDK3,VEGFA,FAM162A,MXI1,FKBP4,IRS2,TPI1,ANKZF1,GLRX,NASP,UGP2,AK4,PPFIA4
Hypoxia	8.90847e-05	0.00249437	0.538434	0.89813	1.34404	96	15_NBB_AD52_SPG	4.0502	2.60304	PLAC8,P4HA1,DDIT4,PGK1,SLC2A3,PFKFB3,BNIP3L,ZNF292,NEDD4L,LDHA,RBPJ,PDK1,DUSP1,PPP1R15A,HMOX1,ENO1,SAP30,PFKP,ERO1A,SLC2A1,HK2,GPI,PDK3,KDM3A,VEGFA,FAM162A,PGM1,SLC2A5,BHLHE40,MXI1,GBE1,CDKN1A,IRS2,FOSL2,NDST1,TPI1,HK1,ANKZF1,GLRX,PLAUR,CCNG2,PNRC1,PIM1,NDRG1,UGP2,AK4,NFIL3,PPFIA4
Interferon Gamma Response	0.00519592	0.0615741	0.407018	0.851922	1.27931	116	15_NBB_AD52_SPG	2.28434	1.2106	HIF1A,PLSCR1,IL4R,PDE4B,LAP3,PTPN2,NLRC5,NAMPT,TXNIP,PFKP,CIITA,HLA-B,IL10RA,EPSTI1,STAT3,PTPN1,IL15,CASP4,CASP1,SOCS3,CDKN1A,SOD2,SP110,FPR1,HLA-A,IFNAR2,TRIM25,PIM1,PSMB9,IFITM3,BST2,B2M,IRF2,PLA2G4A,RIPK2,MVP
Unfolded Protein Response	0.00549769	0.0615741	0.407018	0.8812	1.31425	68	15_NBB_AD52_SPG	2.25982	1.2106	DDIT4,SLC7A5,BAG3,ERO1A,VEGFA
Wnt-beta Catenin Signaling	0.0437284	0.22242	0.231127	0.918298	1.3259	19	15_NBB_AD52_SPG	1.35924	0.652826	PPARD,RBPJ,CUL1,NUMB,KAT2A
heme Metabolism	0.0427975	0.22242	0.222056	0.825613	1.23618	95	15_NBB_AD52_SPG	1.36858	0.652826	SLC25A37,BNIP3L,SLC2A1,NARF,SDCBP,MXI1,TOP1,BTG2,BACH1,CLIC2
mTORC1 Signaling	8.57394e-05	0.00249437	0.538434	0.890151	1.33942	124	15_NBB_AD52_SPG	4.06682	2.60304	P4HA1,DDIT4,PGK1,SLC7A5,PPA1,SLC2A3,LDHA,PDK1,PPP1R15A,NAMPT,ENO1,ERO1A,SLC2A1,BCAT1,HK2,GPI,ELOVL5,PGM1,STIP1,SLA,BHLHE40,HSPD1,CACYBP,GBE1,CDKN1A,HPRT1,BTG2,TPI1,GGA2,GLRX
p53 Pathway	0.0144605	0.131829	0.38073	0.835985	1.25405	101	15_NBB_AD52_SPG	1.83982	0.87999	DDIT4,PPP1R15A,HMOX1,IER5,TXNIP,PVT1,ALOX15B,FAM162A,CASP1,MXD1,CDKN1A,STOM,RGS16,ACVR1B,BTG2,RALGDS,NDRG1,ST14,PTPRE,RXRA,BAIAP2
Fatty Acid Metabolism	0.00324295	0.181605	0.431708	-0.850458	-1.71451	66	15_NBB_AD53_HIP	2.48906	0.740871	HSP90AA1,HSPH1,ACSL1,LDHA
KEGG_RIBOSOME	6.24755e-05	0.00349863	0.538434	-0.908661	-1.65779	54	16_NBB_AD34_HIP	4.20429	2.4561	RPS24,RPL10,RPS27,RPLP1,RPS8,RPLP2,RPL11,RPL37A,RPL32,RPS25,RPS2,RPS12,RPS23,RPS9,RPS27A,RPL7A,RPL34,RPL5,RPL23,RPSA,RPL28,RPS15,RPS20,RPL35,RPL14,RPL3,RPL6,RPS3,RPL37,RPL24,RPL18,RPL8,RPL30,RPL23A,RPL21,RPS7,RPS19,RPL9,RPS6,RPL31,UBA52,RPS16,RPL13A,RPLP0
Apoptosis	0.00533407	0.149354	0.407018	0.889223	1.53363	69	16_NBB_AD52_HIP	2.27294	0.825783	DPYD,IGF2R,DNAJA1,CASP4,HSPB1
KEGG_RIBOSOME	4.82058e-10	2.69953e-08	0.801216	-0.879873	-2.13916	75	16_NBB_AD52_HIP	9.3169	7.56871	RPS23,RPL21,RPL19,RPL32,RPS12,RPS4X,RPL34,RPLP2,RPL8,RPLP1,RPL13,RPS25,RPL18A,RPS2,RPL24,RPL27A,RPS27,RPL11,RPL18,RPL23,FAU,RPS21,RPS15,RPS27A,RPL6,RPL27,RPL23A,UBA52,RPL14,RPL3,RPS20,RPS18,RPS11,RPL10,RPL38,RPL29,RPS16,RPL30,RPS19,RPL15,RPL5,RPL41,RPS3A,RPS8,RPL7A,RPS15A
Apoptosis	0.0465608	0.245	0.213928	0.76789	1.27654	83	16_NBB_AD52_SPG	1.33198	0.610834	DPYD,TXNIP,IGF2R,HSPB1,CASP4,HMOX1,DNAJA1,BNIP3L,SOD2,PTK2,TSPO,SLC20A1,DNAJC3,IFITM3,CASP1,PAK1
Fatty Acid Metabolism	0.000745891	0.0203711	0.477271	0.874262	1.43747	65	16_NBB_AD52_SPG	3.12732	1.69099	HSP90AA1,HSPH1,ACSL1,ELOVL5,LDHA,GLUL,ACSL4
Hypoxia	0.00109131	0.0203711	0.45506	0.83987	1.40532	95	16_NBB_AD52_SPG	2.96205	1.69099	PLAC8,P4HA1,DDIT4,PGK1,NEDD4L,PFKFB3,SLC2A3,PIM1,ZNF292,PDK1,LDHA,HMOX1,RBPJ,BNIP3L,PFKP,VEGFA,HK1,NDST1,ERO1A,LARGE1,HK2,DTNA,VHL,GLRX,BHLHE40,SLC2A5,PDK3,HSPA5,ENO1,PGM1,TPI1,UGP2,GPI,PLAUR
IL-2/STAT5 Signaling	0.0226311	0.211224	0.352488	0.778955	1.30065	93	16_NBB_AD52_SPG	1.64529	0.675258	P4HA1,IL4R,PLSCR1,SPP1,IGF2R,TNFRSF1B,SLC2A3,PIM1,SELL,GPR65,IKZF2,ITGAV,MAP3K8,HK2,IL10RA,SYNGR2,CTSZ,BHLHE40,MXD1,IFITM3,UCK2,RHOH,GLIPR2,MAPKAPK2,NFIL3
Interferon Alpha Response	0.00561707	0.0629112	0.407018	0.845739	1.38829	59	16_NBB_AD52_SPG	2.25049	1.20127	IL4R,PLSCR1,LAP3,TXNIP,IL15,EPSTI1,SELL,SP110,IRF2,PARP9,TRIM14,PSMB9,NMI,TRIM25,IFITM3,CASP1,GBP2,UBE2L6,OGFR,BST2
Interferon Gamma Response	0.000268185	0.0150184	0.498493	0.840809	1.41011	116	16_NBB_AD52_SPG	3.57157	1.82338	IL4R,PTPN2,PLSCR1,PDE4B,NLRC5,LAP3,TXNIP,IL15,HIF1A,EPSTI1,CASP4,PIM1,PFKP,CIITA,IFNAR2,STAT3,SOD2,SP110,PTPN1,IRF2,HLA-B,NAMPT,IL10RA,TRIM14,NFKB1,PSMB9,NMI,TRIM25,IFITM3,FCGR1A,ARID5B,CASP1,FPR1,UBE2L6,OGFR,BST2
KEGG_OXIDATIVE_PHOSPHORYLATION	0.0305344	0.244275	0.271289	0.800557	1.31099	58	16_NBB_AD52_SPG	1.51521	0.612121	PPA1,TCIRG1
KRAS Signaling Dn	0.0381334	0.245	0.321776	-0.763793	-1.47898	29	16_NBB_AD52_SPG	1.41869	0.610834	GRID2,RYR1,SGK1
Wnt-beta Catenin Signaling	0.0438293	0.245	0.231127	0.877456	1.38247	20	16_NBB_AD52_SPG	1.35824	0.610834	PPARD,CUL1,RBPJ,NOTCH1,NUMB
mTORC1 Signaling	0.00209164	0.029283	0.431708	0.805685	1.35445	127	16_NBB_AD52_SPG	2.67951	1.53339	PPA1,P4HA1,DDIT4,PGK1,ELOVL5,SLC2A3,PDK1,LDHA,STIP1,SKAP2,SLC7A5,SLA,HPRT1,CACYBP,GGA2,ERO1A,NAMPT,HK2,BCAT1,UBE2D3,GLRX,HSPA4,DAPP1,BHLHE40,HSPE1,EDEM1,HSPA5,ENO1,PGM1,HSPD1,HSPA9,TPI1,GPI,CCT6A,FADS2,PRDX1,NFIL3
Coagulation	0.00166035	0.0464898	0.45506	0.901267	1.50861	36	16_NBB_AD53_HIP	2.7798	1.33264	A2M,OLR1,PLEK,KLF7,PECAM1
Fatty Acid Metabolism	0.00152509	0.0464898	0.45506	-0.896714	-1.62665	63	16_NBB_AD53_HIP	2.81671	1.33264	HSP90AA1,HSPH1,ACSL1
Glycolysis	0.00228532	0.063989	0.431708	-0.837073	-1.72472	66	16_NBB_C11_AG	2.64105	1.19389	P4HA1,ZNF292,DDIT4,PGK1,PKM,PFKP,ENO1,IDH1,UGP2,SAP30,PDK3
Hypoxia	0.00463508	0.0865216	0.407018	-0.79687	-1.65657	74	16_NBB_C11_AG	2.33394	1.06288	P4HA1,BNIP3L,NEDD4L,ZNF292,DDIT4,PGK1,PDK1,PFKP,ENO1,SLC2A3,CCNG2,LARGE1,RBPJ,UGP2,KDM3A,SAP30,PDK3
Pperoxisome	0.00933977	0.130757	0.38073	-0.836675	-1.69177	47	16_NBB_C11_AG	2.02966	0.883536	ACSL1,IDH1,CTBP1,ATXN1
mTORC1 Signaling	0.00188488	0.063989	0.45506	-0.79246	-1.65253	98	16_NBB_C11_AG	2.72472	1.19389	P4HA1,DDIT4,PGK1,PDK1,SLC7A5,ENO1,SLA,SLC2A3,HSPD1,IDH1,UBE2D3,CALR,BCAT1,HSPA4,RAB1A,GBE1,LTA4H,GLRX,SQSTM1,HPRT1,HSP90B1,ERO1A,SLC6A6
Fatty Acid Metabolism	0.0131324	0.147083	0.38073	0.882959	1.65964	40	2_NBB_AD34_HIP	1.88166	0.832438	HSP90AA1,HSPH1,ACSL1
Hypoxia	0.00721907	0.101067	0.407018	0.815407	1.69518	75	2_NBB_AD34_HIP	2.14152	0.995391	P4HA1,SERPINE1,DUSP1,CXCR4,HMOX1,PPP1R15A,NEDD4L,PLAC8,IRS2,DDIT4,BNIP3L,SCARB1,SLC6A6,FOXO3,PGM1,FOS,ZNF292,PDK1
Interferon Alpha Response	3.94325e-05	0.00110411	0.557332	-0.836834	-1.57705	35	2_NBB_AD34_HIP	4.40415	2.95699	EPSTI1,PARP14,LPAR6,NCOA7,SAMD9L,TRIM5,PARP9,B2M,PLSCR1,DDX60,IL4R,HLA-C,LAP3,EIF2AK2
Interferon Gamma Response	0.00112683	0.0210341	0.45506	-0.703554	-1.43954	72	2_NBB_AD34_HIP	2.94814	1.67708	FCGR1A,EPSTI1,PARP14,SAMD9L,PTPN1,FGL2,XAF1,B2M,SSPN,RIPK1,ST3GAL5,PLSCR1,DDX60,IL4R,PTPN2,HLA-B,HLA-DRB1,SAMHD1,LAP3,EIF2AK2
KEGG_RIBOSOME	1.35623e-05	0.00075949	0.593325	-0.816894	-1.59381	46	2_NBB_AD34_HIP	4.86767	3.11948	RPLP1,RPS24,RPL5,RPL10,RPL37A,RPS3,RPL31,RPS27,RPL7A,RPL18,RPS2,RPLP2,RPS27A,RPS9,RPL28,RPL34,RPL11,RPS25,RPS11,RPL13,RPS8,RPSA,RPL30,RPL19,RPS15,RPL36,RPL6,RPL23,RPL37,RPS6,RPL14,RPL27A,RPS19,RPL21,RPL3
Apoptosis	0.018367	0.171425	0.352488	0.900247	1.48721	71	2_NBB_AD52_HIP	1.73596	0.765926	DPYD,HSPB1,HMOX1,BNIP3L,DNAJA1,IGF2R
Fatty Acid Metabolism	0.00146251	0.0399792	0.45506	0.948719	1.54371	53	2_NBB_AD52_HIP	2.8349	1.39817	HSP90AA1,HSPH1,ACSL1,LDHA,PTPRG,ELOVL5
Hypoxia	0.00212513	0.0399792	0.431708	0.923945	1.54652	87	2_NBB_AD52_HIP	2.67261	1.39817	P4HA1,DDIT4,SLC2A3,PGK1,HMOX1,PPP1R15A,GBE1,ZNF292,NEDD4L,SLC2A1,PDK1,PFKP,BNIP3L,PLAC8,DUSP1,DTNA,GPI,RBPJ,KDM3A,VEGFA,HK2,PFKFB3,SERPINE1,LDHA,SLC2A5,ENO1,FAM162A,PGM1,PIM1,ZFP36,UGP2
IL-2/STAT5 Signaling	0.0138645	0.155283	0.38073	0.891812	1.49317	85	2_NBB_AD52_HIP	1.85809	0.808877	SPP1,P4HA1,SLC2A3,HK2,MYO1E,RGS16,IGF2R,PIM1,ALCAM,IKZF2,PLSCR1,BHLHE40,IL4R,AHNAK
KEGG_RIBOSOME	0.00495	0.0693	0.407018	-0.826043	-1.60847	74	2_NBB_AD52_HIP	2.30539	1.15927	RPS18,RPL32,RPS27A,RPLP1,RPS23,RPLP2,RPL23,RPL34,RPL27A,RPL3,RPS27,RPS25,RPS2,RPL8,RPS4X,UBA52,RPL36,RPL19,RPL10,RPL21,RPS12,RPL35A,RPS11,RPS20,RPL37,RPL5,RPS16,RPL13,FAU,RPS3A,RPL14,RPL29,RPS13,RPL38,RPL12,RPL11,RPS7,RPL7A,RPL10A,RPS3,RPL30,RPL18A,RPS17,RPL13A,RPL35,RPS8,RPL37A,RPL18,RPL27
mTORC1 Signaling	0.00214174	0.0399792	0.431708	0.911559	1.55691	113	2_NBB_AD52_HIP	2.66923	1.39817	P4HA1,DDIT4,SLC2A3,PGK1,PPP1R15A,GBE1,SLC2A1,SLC7A5,PDK1,BCAT1,STIP1,GPI,HSPD1,HK2,PPA1,LDHA,ACACA,CACYBP,ENO1,ELOVL5,PGM1,UBE2D3,HPRT1,NMT1,ERO1A,BHLHE40,SLA,HSPA4,HSP90B1
Adipogenesis	0.0319489	0.178776	0.261664	0.85015	1.24848	91	2_NBB_AD52_SPG	1.49554	0.747691	UBC,BCL6,PFKFB3,GBE1,CCNG2,PGM1,PLIN2,ALDOA
Fatty Acid Metabolism	0.00135308	0.0252575	0.45506	0.922627	1.34019	58	2_NBB_AD52_SPG	2.86868	1.59761	HSP90AA1,HSPH1,ACSL1,LDHA,GLUL,ENO2,ALDOA
Glycolysis	0.00206421	0.0288989	0.431708	0.895028	1.30828	85	2_NBB_AD52_SPG	2.68525	1.53912	DDIT4,PGK1,P4HA1,PFKP,ERO1A,ENO1,FAM162A,ZNF292,HK2,MXI1,LDHA,CXCR4,PKM,VEGFA,PPFIA4,PDK3,ENO2,P4HA2,AK4,SLC16A3,TPI1,UGP2,ANKZF1,SAP30,GYS1
Hypoxia	8.29777e-06	0.000338714	0.593325	0.928374	1.36695	103	2_NBB_AD52_SPG	5.08104	3.47017	SLC2A3,DDIT4,BNIP3L,PPP1R15A,PGK1,P4HA1,PFKFB3,GBE1,PFKP,ERO1A,NEDD4L,PDK1,ENO1,FAM162A,ZNF292,HK2,HMOX1,MXI1,LDHA,RBPJ,CDKN1A,CXCR4,DUSP1,VEGFA,SLC2A1,KDM3A,GPI,SLC2A5,PPFIA4,ADM,PDK3,ENO2,P4HA2,AK4,CCNG2,ZFP36,PDGFB,PGM1,GAPDH,TPI1,FOSL2,BHLHE40,FOS,PNRC1,UGP2,JUN,ANKZF1,SAP30,GYS1
KEGG_GLYCOLYSIS_GLUCONEOGENESIS	0.0220816	0.137397	0.352488	0.937789	1.33069	23	2_NBB_AD52_SPG	1.65597	0.862023	PGK1,PFKP,ENO1,HK2,LDHA,PKM,GPI,ENO2,PGM1,GAPDH,TPI1,ALDOA,PGAM1
Myc Targets V1	0.00407501	0.0456401	0.407018	0.866105	1.28232	116	2_NBB_AD52_SPG	2.38987	1.34065	PGK1,LDHA,HSP90AB1,PTGES3,CUL1,HSPD1,DEK,VDAC1,AP3S1,HNRNPU,HPRT1,TCP1,UBA2
Oxidative Phosphorylation	0.0469584	0.178914	0.213928	0.839737	1.23392	88	2_NBB_AD52_SPG	1.32829	0.747356	LDHA,GPI,VDAC1,TCIRG1
Reactive Oxygen Species Pathway	0.0382244	0.178776	0.257206	0.904506	1.29388	29	2_NBB_AD52_SPG	1.41766	0.747691	PFKP,MBP,SBNO2,SOD2,LSP1,OXSR1,JUNB,FTL,ABCC1
TNF-alpha Signaling via NF-kB	0.00598502	0.0496768	0.407018	0.874493	1.28661	94	2_NBB_AD52_SPG	2.22293	1.30385	SLC2A3,PPP1R15A,BCL6,PFKFB3,CEBPD,NAMPT,PDE4B,CDKN1A,DUSP1,VEGFA,IER5,DENND5A,ZFP36,REL,MCL1,TNIP1,FOSL2,BHLHE40,FOS,PNRC1,SOD2,ETS2,JUN,JUNB,SOCS3,TNFAIP8,MXD1,BTG2,TLR2,B4GALT5,IFNGR2
Unfolded Protein Response	0.00964404	0.0675082	0.38073	0.898473	1.30396	62	2_NBB_AD52_SPG	2.01574	1.17064	DDIT4,ERO1A,SLC7A5,VEGFA,BAG3,EDEM1
Wnt-beta Catenin Signaling	0.0383091	0.178776	0.266351	0.942898	1.31476	17	2_NBB_AD52_SPG	1.4167	0.747691	PPARD,RBPJ,CUL1,NUMB
mTORC1 Signaling	1.20969e-05	0.000338714	0.593325	0.913888	1.35472	119	2_NBB_AD52_SPG	4.91733	3.47017	SLC2A3,DDIT4,PPP1R15A,PGK1,BCAT1,P4HA1,GBE1,ERO1A,PDK1,ENO1,HK2,NAMPT,LDHA,SLC7A5,CDKN1A,CXCR4,SLC2A1,GPI,AK4,PGM1,GAPDH,GGA2,TPI1,EDEM1,STIP1,BHLHE40,PPA1,TFRC,HSPD1,SCD,VLDLR,CACYBP,ALDOA
p53 Pathway	0.0062096	0.0496768	0.407018	0.875942	1.28861	95	2_NBB_AD52_SPG	2.20694	1.30385	DDIT4,PPP1R15A,FAM162A,HMOX1,CDKN1A,IER5,RGS16,FOS,JUN,BAIAP2,MXD1,RXRA,RALGDS,BTG2
Apoptosis	0.00596221	0.111295	0.407018	-0.859254	-1.61203	57	3_NBB_AD34_HIP	2.22459	0.953526	DPYD,SAT1,CD14,BTG2,CCND1,DNAJC3,SLC20A1
Interferon Alpha Response	0.00589599	0.111295	0.407018	-0.870027	-1.556	39	3_NBB_AD34_HIP	2.22944	0.953526	EPSTI1,PLSCR1,LAP3,IL4R,TRIM5,SAMD9L,CD74,PARP9,B2M,LPAR6,PARP14,EIF2AK2,HLA-C
KEGG_RIBOSOME	0.000153727	0.00860869	0.518848	-0.916625	-1.70174	50	3_NBB_AD34_HIP	3.81325	2.06506	RPL10,RPL3,RPS27,RPL18,RPS2,RPL28,RPL13,RPL35,RPL37A,RPS9,RPS24,RPL21,RPS15,RPS6,RPS12,RPS27A,RPS11,RPS19,RPS3,RPL7A,RPSA,RPLP1,RPS8,RPS28,RPL12,RPL5,RPL27A,RPL11,RPL6,RPL36,RPL15,RPL24,RPL32,RPL13A,RPL34,RPS23,RPLP2,RPS20,RPL37
KEGG_ALZHEIMERS_DISEASE	0.00144546	0.0161892	0.45506	0.884128	1.57124	60	3_NBB_AD52_HIP	2.83999	1.79078	MT-ATP6,MT-CO2,MT-CYB,MT-CO3,MT-CO1,ATP2A2
KEGG_HUNTINGTONS_DISEASE	0.000179696	0.00251574	0.518848	0.900992	1.62815	66	3_NBB_AD52_HIP	3.74546	2.59933	MT-ATP6,MT-CO2,MT-CYB,MT-CO3,MT-CO1,PPARG,CLTC
KEGG_OXIDATIVE_PHOSPHORYLATION	1.39098e-06	3.89474e-05	0.643552	0.952247	1.68901	50	3_NBB_AD52_HIP	5.85668	4.40952	MT-ATP6,MT-ND3,MT-ND4,MT-CO2,MT-CYB,MT-CO3,MT-ND1,MT-ND5,MT-ND2,MT-ND4L,MT-CO1
KEGG_PARKINSONS_DISEASE	7.17506e-06	0.000133934	0.610527	0.955154	1.69283	47	3_NBB_AD52_HIP	5.14417	3.87311	MT-ATP6,MT-ND3,MT-ND4,MT-CO2,MT-CYB,MT-CO3,MT-ND1,MT-ND5,MT-ND2,MT-ND4L,MT-CO1
KEGG_RIBOSOME	1.06658e-07	5.97285e-06	0.704976	-0.90826	-1.99254	65	3_NBB_AD52_HIP	6.97201	5.22382	RPS2,RPS12,RPS27,RPS16,RPS27A,RPL3,RPS23,RPL21,RPS18,RPS28,RPL10,RPLP2,FAU,RPL23A,RPL24,RPS9,RPL5,RPS3A,RPS20,RPS11,RPS6,RPS7,RPL30,RPL18,RPL6,RPL37A,RPL15,RPL32,RPLP1,RPL13,RPL14,RPS8,RPL11,RPL27A,RPL37,RPS25,RPL10A,RPS24,RPL29,RPL34,RPL8,RPL28,RPS5,RPL7A,RPS13,RPLP0,RPL23
Reactive Oxygen Species Pathway	0.0130755	0.122038	0.38073	0.908896	1.52704	26	3_NBB_AD52_HIP	1.88354	0.913505	IPCEF1,PRDX4
Fatty Acid Metabolism	3.32449e-05	0.00186171	0.557332	-0.959897	-1.65139	64	3_NBB_AD53_HIP	4.47828	2.73009	HSP90AA1,ACSL1,HSPH1
Hedgehog Signaling	0.00494613	0.138492	0.407018	0.978235	1.41504	16	3_NBB_AD53_HIP	2.30573	0.858576	UNC5C,NRP2
Apoptosis	0.0150677	0.235831	0.38073	0.869153	1.42454	78	4_NBB_AD52_HIP	1.82195	0.627399	DPYD,TXNIP,IGF2R,LGALS3,HGF,BNIP3L,CASP7,TSPO,DNAJA1,HSPB1,SAT1
KEGG_OXIDATIVE_PHOSPHORYLATION	0.00729855	0.204359	0.407018	0.905957	1.45355	56	4_NBB_AD52_HIP	2.13676	0.689605	MT-ND3,MT-ND4,MT-ATP6,MT-CO2,MT-CYB,MT-CO3,MT-ND2,MT-ND1,MT-ND4L,ATP6V1B2
KEGG_PARKINSONS_DISEASE	0.0015393	0.0862007	0.45506	0.929297	1.48837	54	4_NBB_AD52_HIP	2.81268	1.06449	MT-ND3,MT-ND4,MT-ATP6,LRRK2,MT-CO2,MT-CYB,MT-CO3,MT-ND2,MT-ND1,MT-ND4L,UBE2L6
Pancreas Beta Cells	0.0168451	0.235831	0.352488	0.955858	1.41386	10	4_NBB_AD52_HIP	1.77353	0.627399	MAFB,SRPRB
Bile Acid Metabolism	0.0140602	0.157474	0.38073	0.908148	1.38081	32	4_NBB_AD52_SPG	1.85201	0.802792	ACSL1,ATXN1,HSD17B4,AQP9
DNA Repair	0.0080034	0.149397	0.38073	0.871215	1.3653	72	4_NBB_AD52_SPG	2.09673	0.825659	PDE4B,SDCBP,HCLS1,RNMT,REV3L,ELL,AK3
Inflammatory Response	0.00586753	0.149397	0.407018	0.868868	1.38446	83	4_NBB_AD52_SPG	2.23154	0.825659	PDE4B,NAMPT,IL15,HIF1A,TNFRSF1B,RNF144B,MSR1,IL10RA,CD55,FPR1,PLAUR,IL4R,MXD1,SERPINE1,C5AR1,AQP9,BST2,RGS1,ACVR1B,PDPN,IFNAR1,RIPK2
Interferon Gamma Response	0.00162162	0.0908109	0.45506	0.855562	1.37103	114	4_NBB_AD52_SPG	2.79005	1.04186	PDE4B,NAMPT,IL15,PLSCR1,HIF1A,TXNIP,IL10RA,HLA-B,ARID5B,LAP3,EPSTI1,FPR1,NLRC5,IFNAR2,IFITM3,STAT3,IL4R,PTPN2,SOD2,BST2,PFKP,TNFAIP3,BTG1,MX2,PTPN1,PELI1,CIITA,TRIM14,CASP4,HLA-A,IFI44L,RIPK2,PIM1,UBE2L6,PSMB9
Pperoxisome	0.0132165	0.157474	0.38073	0.89031	1.36439	51	4_NBB_AD52_SPG	1.87888	0.802792	ACSL1,ATXN1,HSD17B4,SOD2,CADM1,TSPO
Glycolysis	0.00473025	0.0882981	0.407018	-0.873398	-1.53593	69	4_NBB_C11_AG	2.32512	1.05405	P4HA1,PGK1,PFKP,DDIT4,HK2,ZNF292,ERO1A,ENO1,PKM,PYGL,SLC16A3,HSPA5,NASP
Myc Targets V1	0.00381556	0.0882981	0.431708	-0.830424	-1.55597	114	4_NBB_C11_AG	2.41844	1.05405	PTGES3,PGK1,HSP90AB1,XPO1,HSPD1,CCT3,CUL1,VDAC1,HNRNPU,CCT4
mTORC1 Signaling	0.00424364	0.0882981	0.407018	-0.848223	-1.57482	102	4_NBB_C11_AG	2.37226	1.05405	P4HA1,PGK1,DDIT4,SLC7A5,PDK1,SLA,HK2,ERO1A,HSPD1,ELOVL5,SKAP2,BCAT1,ENO1,HSP90B1,UBE2D3,GPI,NAMPT,SLC2A3,HSPA5,HSPA4,CALR,GLRX
Angiogenesis	0.0431034	0.221573	0.224966	-0.820224	-1.35115	6	5_NBB_AD34_HIP	1.36549	0.654483	OLR1
Apical Junction	0.0363825	0.221573	0.24134	-0.614994	-1.23294	45	5_NBB_AD34_HIP	1.43911	0.654483	ACTB,ITGA9,ADAM9,YWHAH,PIK3CB,B4GALT1,PECAM1,CTNND1
Cholesterol Homeostasis	0.0280374	0.221573	0.276501	-0.737396	-1.33426	13	5_NBB_AD34_HIP	1.55226	0.654483	SREBF2,PDK3,PLSCR1,ANXA5,CPEB2,PNRC1
Complement	0.0269253	0.221573	0.352488	-0.601898	-1.23409	60	5_NBB_AD34_HIP	1.56984	0.654483	C1QC,OLR1,LAP3,ADAM9,PLEK,C1QA,CEBPB,GCA,KYNU,SH2B3,CBLB,ITGAM,CALM1,CTSS,IRF2,CD46,PREP,PLSCR1,CASP10,GNAI3,ANXA5,LAMP2,TIMP2,ZEB1,USP8,GNG2,PSEN1,CTSH,PIK3CG,CASP4,PDGFB,KIF2A,LCP2
IL-2/STAT5 Signaling	0.0157849	0.221573	0.352488	-0.613862	-1.24488	52	5_NBB_AD34_HIP	1.80176	0.654483	IL4R,PHTF2,ANXA4,IRF8,SERPINB6,FAM126B,MAP3K8,PLPP1,IGF2R,IL10RA,HK2,SNX14,PLSCR1,SPRED2,PLAGL1,KLF6,CD81,BCL2L1
IL-6/JAK/STAT3 Signaling	0.0320248	0.221573	0.257206	-0.66055	-1.26125	24	5_NBB_AD34_HIP	1.49451	0.654483	IL4R,MAP3K8,IFNAR1,TLR2,STAM2,TNFRSF1A
Interferon Alpha Response	0.0423117	0.221573	0.222056	-0.681789	-1.27654	19	5_NBB_AD34_HIP	1.37354	0.654483	LAP3,IL4R,EPSTI1,PARP9,EIF2AK2,IRF2,TDRD7,ADAR,PLSCR1,TRIM14,NCOA7
Interferon Gamma Response	0.0435233	0.221573	0.21925	-0.60172	-1.21534	49	5_NBB_AD34_HIP	1.36128	0.654483	LAP3,HLA-DRB1,IL4R,EPSTI1,XAF1,HLA-B,IRF8,SOD2,EIF2AK2,IL10RA,IFNAR2,IRF2,ST3GAL5,TDRD7,ADAR,PLSCR1,TRIM14,PFKP,SPPL2A
KEGG_RIBOSOME	0.000228594	0.0128013	0.518848	-0.849129	-1.56735	16	5_NBB_AD34_HIP	3.64093	1.89275	RPL10,RPS24,RPL37A,RPS8,RPL28,RPLP1,RPS2,RPL5,RPL11,RPL37,RPL13A,RPL18
Myc Targets V1	0.0279793	0.221573	0.276501	-0.620635	-1.2439	44	5_NBB_AD34_HIP	1.55316	0.654483	PGK1,CANX,PSMD1,RPS2,DHX15,RAD23B,HNRNPR,RPL18,DEK,EIF4E,SSBP1,KPNB1,CNBP,IFRD1,SRSF7,G3BP1,YWHAE,EIF4G2,GSPT1
TNF-alpha Signaling via NF-kB	0.00282961	0.0792292	0.431708	-0.652802	-1.30873	45	5_NBB_AD34_HIP	2.54827	1.10111	OLR1,CCNL1,PLEK,CEBPB,TNFAIP8,SOD2,KYNU,SAT1,MAP3K8,ETS2,CEBPD,MARCKS,B4GALT1
Allograft Rejection	0.017305	0.24227	0.352488	-0.590366	-1.26554	57	5_NBB_AD52_HIP	1.76183	0.6157	HLA-DRA,IKBKB,HLA-E,HLA-DMB,RPS19,ITGB2,B2M,NCK1,CD74,CD4,MRPL3,MAP3K7,RPS9,CTSS,IRF8,IFNGR1,SPI1
Apical Junction	0.00692701	0.129304	0.407018	-0.638771	-1.3501	48	5_NBB_AD52_HIP	2.15945	0.888387	ITGA9,ITGB1,B4GALT1,YWHAH,ACTB,WASL,CD99,PECAM1,ADAM9,CTNND1
Coagulation	0.000952209	0.0446902	0.477271	-0.753418	-1.5032	23	5_NBB_AD52_HIP	3.02127	1.34979	OLR1,HTRA1,KLF7,C1QA,PLEK,PECAM1,A2M,ADAM9,LAMP2,CTSH
KEGG_RIBOSOME	0.00159608	0.0446902	0.45506	-0.794244	-1.54335	17	5_NBB_AD52_HIP	2.79695	1.34979	RPLP1,RPL28,RPS28,RPS19,RPL13A,RPL13,RPL10,RPL5,RPL6,RPS8,RPL37A
Fatty Acid Metabolism	0.00722143	0.2022	0.407018	0.762367	1.70007	26	5_NBB_AD52_SPG	2.14138	0.694218	HSP90AA1,ACSL1,HSPH1
Hypoxia	0.00214543	0.120144	0.431708	0.582986	1.61833	74	5_NBB_AD52_SPG	2.66849	0.920297	P4HA1,NEDD4L,BNIP3L,SLC2A5,PFKFB3,DDIT4,PFKP,ZNF292,RBPJ,PGK1,SLC2A3,PPP1R15A,FAM162A,HK2,PLAC8,PIM1,GBE1
Angiogenesis	0.0211587	0.118488	0.352488	-0.93996	-1.43852	7	5_NBB_AD53_HIP	1.67451	0.926324	SPP1
DNA Repair	0.0422222	0.197037	0.231127	-0.766703	-1.32896	48	5_NBB_AD53_HIP	1.37446	0.705452	PDE4B,SDCBP,HCLS1,REV3L,HPRT1,ELL
Fatty Acid Metabolism	0.00423591	0.0474422	0.407018	-0.831671	-1.42956	43	5_NBB_AD53_HIP	2.37305	1.32384	HSPH1,HSP90AA1,ACSL1,ELOVL5
Glycolysis	0.00167607	0.0474422	0.45506	-0.841656	-1.46652	51	5_NBB_AD53_HIP	2.77571	1.32384	P4HA1,PYGL,PGK1,FUT8,PFKP,PKM,SLC16A3,DDIT4,ZNF292,ERO1A,PDK3,GALK2,ENO1,HK2
Hypoxia	0.0020395	0.0474422	0.431708	-0.820097	-1.43488	55	5_NBB_AD53_HIP	2.69048	1.32384	P4HA1,BNIP3L,PGK1,DUSP1,GAPDH,PFKP,NEDD4L,GBE1,LARGE1,DDIT4,DTNA,ZNF292,ERO1A,PDK3,RBPJ,KDM3A,ENO1,HK2,KLHL24,BTG1
IL-2/STAT5 Signaling	0.0136378	0.106433	0.38073	-0.761113	-1.34507	65	5_NBB_AD53_HIP	1.86526	0.972925	SPP1,P4HA1,IGF2R,PLSCR1,TNFRSF1B,IGF1R,IL10RA,IKZF2,MYO1E,MAP3K8,HK2,IRF8,SPRED2,MAPKAPK2
Inflammatory Response	0.0375276	0.19105	0.245042	-0.755648	-1.32443	59	5_NBB_AD53_HIP	1.42565	0.718854	PDE4B,HIF1A,RNF144B,MSR1,STAB1,TNFRSF1B,IL10RA,P2RX7,IFNAR1,NFKB1
Interferon Gamma Response	0.00279549	0.0474422	0.431708	-0.778749	-1.4112	83	5_NBB_AD53_HIP	2.55354	1.32384	PDE4B,NLRC5,HIF1A,HLA-B,PLSCR1,PTPN2,STAT3,LAP3,PFKP,ARID5B,TXNIP,EPSTI1,IL10RA,CASP1,PTPN1,TRIM14,FCGR1A,IFNAR2,BTG1,IRF8,NFKB1
KEGG_GLYCOLYSIS_GLUCONEOGENESIS	0.0171052	0.106433	0.352488	-0.895803	-1.43691	14	5_NBB_AD53_HIP	1.76687	0.972925	PGK1,GAPDH,PFKP,PKM,ENO1,HK2
KEGG_RIBOSOME	0.0166321	0.106433	0.352488	-0.764617	-1.34678	63	5_NBB_AD53_HIP	1.77905	0.972925	RPL37A,RPS8,RPS6,RPLP1,RPL37,RPS27,RPL11,RPL13A,RPL23,RPL28,RPS16,RPLP2,RPS20,RPL35,RPL6,RPL34,RPS15,RPS29,RPS23,RPL8,RPL36,RPS28,RPL13,RPS25,RPS24,RPL32,RPL27A,RPL19,RPL31,RPS18,RPL10,RPL30,RPS3,RPS12,RPS19,RPL14,RPS11,RPL24,RPL21,RPL23A,RPL35A,RPL7A,FAU,RPL9,RPS27A,RPS9
KRAS Signaling Dn	0.00394529	0.0474422	0.407018	0.863703	1.66732	25	5_NBB_AD53_HIP	2.40392	1.32384	GRID2,PTPRJ,RYR1,CAMK1D
mTORC1 Signaling	0.0113534	0.105965	0.38073	-0.752115	-1.34723	75	5_NBB_AD53_HIP	1.94487	0.974836	P4HA1,PGK1,ELOVL5,BCAT1,GAPDH,HSPD1,GBE1,HSPA4,DDIT4,ERO1A,HSP90B1,SLC7A5,ENO1,EDEM1,HK2,HPRT1,SQSTM1,CANX,CTSC,UBE2D3,HSPA9,CCT6A,ITGB2,IFRD1,NMT1
KEGG_RIBOSOME	6.27731e-10	3.5153e-08	0.801216	0.983235	1.60348	76	6_NBB_AD34_HIP	9.20223	7.45404	RPL34,RPLP2,RPL32,RPS23,RPL37,RPL27,RPS24,RPS13,RPL11,RPL30,UBA52,RPS8,RPL12,RPL35A,RPL38,RPL7,RPL23,RPL27A,RPLP1,RPS20,RPL37A,RPS21,RPS6,RPL8,RPL31,RPS12,RPS27,RPS17,RPS25,RPL6,RPS27A,RPL24,RPL19,RPL5,RPS11,RPS15A,RPL13,RPL23A,RPL21,RPS16,RPL13A,RPS4X,RPS18,RPL36,RPS7,RPL14,RPS29,RPL10,RPL29,RPL4,RPL22,RPL9,RPS3A,RPS15,RPL35,FAU,RPL36AL
KEGG_RIBOSOME	9.55927e-09	5.35319e-07	0.74774	0.988514	1.26783	80	6_NBB_AD52_HIP	8.01958	6.27139	RPL32,RPL37,RPL34,RPL38,RPL12,RPS24,RPS23,RPS27,RPL37A,RPLP1,RPLP2,RPS8,RPL11,RPS25,RPL27A,RPL30,RPS13,RPL19,RPL31,RPL23A,RPL23,UBA52,RPL35A,RPS20,RPL27,RPS6,RPS27A,RPS18,RPS12,RPL29,RPS11,RPL13,RPL10,RPL36,RPS16,RPL7,RPL35,RPS3A,RPS15,RPS21,RPL24,RPS17,RPL9,RPL14,FAU,RPS15A,RPL28,RPS4X,RPS29,RPL8,RPL41,RPL13A,RPS7,RPL22,RPL21,RPL6,RPS19,RPS3,RPS2,RPL10A,RPL18A,RPL5,RPS28,RPS9,RPL15,RPL3,RPL7A,RP…
KEGG_RIBOSOME	2.56898e-08	1.43863e-06	0.733762	0.986149	1.27114	79	6_NBB_AD52_SPG	7.59024	5.84205	RPL32,RPS27,RPLP1,RPL37,RPS23,RPS24,RPS25,RPL34,RPL37A,RPL11,RPL23A,RPL19,RPL38,RPLP2,RPS8,RPL23,RPL27A,RPL12,RPS6,RPL29,RPS12,UBA52,RPS18,RPS20,RPS13,RPL35A,RPS11,RPL30,RPL10,RPL35,RPS27A,RPL36,RPS3A,RPL27,RPL13,RPL28,RPL9,RPL21,FAU,RPL24,RPL18A,RPS15,RPS4X,RPS21,RPS7,RPL6,RPL41,RPL8,RPS15A,RPL31,RPS19,RPS16,RPL14,RPS17,RPL7,RPS3,RPL13A,RPL22,RPL10A,RPS2,RPL3,RPL15,RPS29,RPS28,RPS9,RPL7A,RPS26,R…
Fatty Acid Metabolism	0.000204168	0.00571669	0.518848	-0.918362	-1.78415	63	6_NBB_AD53_HIP	3.69001	2.24286	HSP90AA1,HSPH1,ACSL1,ELOVL5
Hypoxia	0.00615865	0.0862211	0.407018	-0.84877	-1.67349	72	6_NBB_AD53_HIP	2.21051	1.06439	P4HA1,BNIP3L,DTNA,NEDD4L,ZNF292,PGK1,PDK1,RBPJ,PFKP,DDIT4,HK2,DUSP1,LDHA,HSPA5,ENO1,LARGE1,GBE1,ERO1A,GPI,CCNG2
KEGG_RIBOSOME	7.07972e-12	3.96464e-10	0.887075	0.986031	1.47671	79	6_NBB_AD53_HIP	11.15	9.4018	RPS18,RPL19,RPS27,RPL11,RPLP1,RPL37A,RPL32,RPS24,RPL23A,RPLP2,RPL27A,RPS25,RPL10,RPS20,RPS23,RPL37,RPL23,RPS12,RPS27A,RPS11,RPS8,RPL13A,RPL3,RPL34,RPS3A,RPL35A,RPL28,RPL13,RPL38,FAU,RPL24,RPS2,RPL12,RPS15,RPS4X,RPL14,RPL8,RPS3,RPL30,RPL10A,RPL21,RPS7,RPL18A,RPL35,RPL5,RPL29,UBA52,RPS9,RPL7A,RPS13,RPL7,RPS16,RPL18,RPL36,RPS19,RPL6,RPS17,RPL31,RPL27,RPS6,RPL15,RPS15A,RPS21,RPL41,RPL9,RPL36AL,RPS28,…
mTORC1 Signaling	0.00542666	0.0862211	0.407018	-0.818001	-1.659	105	6_NBB_AD53_HIP	2.26547	1.06439	P4HA1,STIP1,PGK1,PDK1,ELOVL5,DDIT4,NAMPT,HK2,UBE2D3,SKAP2,HSPD1,BCAT1,LDHA,HSPA4,HSPA5,SLA,ENO1,GBE1,ERO1A,GPI
KEGG_RIBOSOME	2.01299e-08	1.12728e-06	0.733762	0.99097	1.33604	78	6_NBB_C11_AG	7.69616	5.94797	RPS27,RPL19,RPLP2,RPL32,RPL37A,RPL23A,RPS24,RPL37,RPS4X,RPS25,RPS27A,RPS18,RPS20,RPS11,RPL23,RPL38,RPS23,RPL11,RPS8,RPS15,RPS6,RPLP1,RPL13A,RPL14,RPL35,FAU,RPL27A,RPL13,RPL28,RPS12,RPL3,RPL12,RPL34,RPL6,RPL10,UBA52,RPL24,RPL8,RPL31,RPL5,RPL30,RPL36,RPS3,RPL41,RPS3A,RPS21,RPL7A,RPL21,RPL18A,RPL29,RPS16,RPL35A,RPL15,RPS2,RPL18,RPL10A,RPS9,RPS17,RPL36AL,RPS13,RPL27,RPS28,RPL9,RPS7,RPS19,RPL7,RPS15A,…
KEGG_ALZHEIMERS_DISEASE	0.00137382	0.0192335	0.45506	0.940315	1.51713	58	7_NBB_AD52_HIP	2.86207	1.71594	MT-ATP6,MT-CO2,MT-CYB,MT-CO3,ATP2A2,MT-CO1
KEGG_HUNTINGTONS_DISEASE	0.000765156	0.0142829	0.477271	0.945519	1.53445	62	7_NBB_AD52_HIP	3.11625	1.84518	MT-ATP6,MT-CO2,MT-CYB,MT-CO3,MT-CO1,CLTC,AP2A2,PPARG
KEGG_OXIDATIVE_PHOSPHORYLATION	9.78495e-06	0.000547957	0.593325	0.979047	1.56625	47	7_NBB_AD52_HIP	5.00944	3.26125	MT-ATP6,MT-ND3,MT-CO2,MT-CYB,MT-ND4,MT-CO3,MT-ND1,MT-ND2,MT-ND5,MT-ND4L,MT-CO1
KEGG_PARKINSONS_DISEASE	8.29862e-05	0.00232361	0.538434	0.97223	1.54337	42	7_NBB_AD52_HIP	4.08099	2.63384	MT-ATP6,MT-ND3,MT-CO2,MT-CYB,MT-ND4,MT-CO3,MT-ND1,MT-ND2,MT-ND5,MT-ND4L,MT-CO1
Apoptosis	0.00350253	0.0421772	0.431708	-0.824803	-1.544	60	8_NBB_AD34_HIP	2.45562	1.37492	SAT1,DPYD,BTG2,DNAJC3,IL18,IGF2R,DNM1L,MCL1,NEDD9,CCND1,BCL2L1,GPX1,HMOX1,CYLD,MGMT,SOD2
Complement	0.00938117	0.0750493	0.38073	-0.767858	-1.52683	84	8_NBB_AD34_HIP	2.02774	1.12465	C1QC,CTSB,PLSCR1,C1QA,LIPA,LAP3,CEBPB,GRB2,ADAM9,ITGAM,OLR1,AKAP10,KYNU,GCA,APOC1,ZEB1,CPQ,PLEK,GPD2,CALM1,PLA2G4A,LCP2,HSPA1A,ANXA5,CD55,USP16
Interferon Alpha Response	0.00376582	0.0421772	0.431708	-0.853104	-1.5299	40	8_NBB_AD34_HIP	2.42414	1.37492	IL4R,CD74,PLSCR1,LPAR6,EPSTI1,B2M,LAP3,TRIM5,PARP9,SAMD9L,PARP14,HLA-C,BST2
Interferon Gamma Response	0.00204236	0.0421772	0.431708	-0.803219	-1.58862	81	8_NBB_AD34_HIP	2.68987	1.37492	FCGR1A,IL4R,CD74,PLSCR1,EPSTI1,PTPN2,ARID5B,B2M,LAP3,PTPN1,HLA-DRB1,SAMD9L,HLA-B,MTHFD2,XAF1,PARP14,ST3GAL5,SAMHD1,FGL2,BST2,PLA2G4A,LCP2,EIF2AK2,IL10RA,SOD2,PARP12,TRIM14,STAT2
KEGG_RIBOSOME	1.47123e-05	0.000823888	0.593325	-0.938445	-1.68118	39	8_NBB_AD34_HIP	4.83232	3.08413	RPS2,RPL10,RPLP1,RPL28,RPL3,RPS27A,RPL5,RPL35,RPLP2,RPS9,RPL37A,RPS6,RPS8,RPL34,RPS15,RPL18,RPS19,RPS24,RPL13A,RPL11,RPL6,RPL30,RPL7A,RPS23,RPS3,RPL21,RPL13,RPL37,RPL14,RPSA,RPS28,RPS16,RPL36
Myc Targets V1	0.0252212	0.156932	0.352488	-0.716059	-1.43147	88	8_NBB_AD34_HIP	1.59823	0.804289	RPS2,CANX,RPS6,DDX21,RPL34,RPL18,RPL6,SRSF2,RPS3,RPL14,RACK1,PSMD14,HNRNPA1,PABPC1,SRSF7,EIF4E,EIF2S2,LDHA,DDX18,PGK1,HSPD1,EIF3J,HNRNPR,ABCE1,SYNCRIP,CNBP
TNF-alpha Signaling via NF-kB	0.0109358	0.0765507	0.38073	-0.788558	-1.49522	65	8_NBB_AD34_HIP	1.96115	1.11605	SAT1,BCL6,PFKFB3,SGK1,BTG2,CEBPB,CEBPD,MAP3K8,MARCKS,EIF1,IL18,OLR1,CCNL1,KYNU,IFNGR2,NINJ1,PLEK,MCL1,CCND1,TNFAIP8
Unfolded Protein Response	0.00358502	0.0421772	0.431708	-0.830835	-1.52405	50	8_NBB_AD34_HIP	2.44551	1.37492	HSP90B1,RPS14,CEBPB,DDIT4,NABP1,DNAJC3,EIF4A2,HERPUD1,SLC7A5,MTHFD2,DDX10,EIF4E,SEC31A
mTORC1 Signaling	0.00533813	0.0498225	0.407018	-0.762159	-1.52363	88	8_NBB_AD34_HIP	2.27261	1.30257	HSP90B1,BTG2,CANX,ITGB2,DDIT4,GAPDH,SLC7A5,MTHFD2,ATP2A2,BCAT1,PSMD14,IMMT,EIF2S2,FGL2,LDHA,PGK1,ENO1,M6PR,USO1,HSPD1,ACSL3,GBE1,GPI
KEGG_OXIDATIVE_PHOSPHORYLATION	0.00862944	0.240417	0.38073	0.912255	1.49974	45	8_NBB_AD52_HIP	2.06402	0.619035	MT-ATP6,MT-ND3,MT-ND4,MT-CO2,MT-CYB,MT-CO3,PPA1,MT-ND2,MT-ND1,MT-ND4L,MT-ND5
KEGG_PARKINSONS_DISEASE	0.0175377	0.245528	0.352488	0.913883	1.48236	42	8_NBB_AD52_HIP	1.75603	0.609898	MT-ATP6,MT-ND3,MT-ND4,MT-CO2,MT-CYB,MT-CO3,UBE2J1,MT-ND2,MT-ND1,MT-ND4L,MT-ND5
KEGG_RIBOSOME	3.63132e-06	0.000203354	0.627257	-0.930494	-1.78535	62	8_NBB_AD52_HIP	5.43994	3.69175	RPS27,RPS18,RPLP2,RPLP1,RPS2,RPL3,RPL10,RPS12,RPL32,RPS11,RPL15,RPL19,RPL13,RPS23,RPL11,RPS27A,RPL30,RPL37A,RPS20,RPL24,RPL6,RPL18,RPL34,RPS19,RPL8,RPS28,RPS15,RPL38,RPL23,RPS25,RPL21,RPL5,RPL13A,RPL14,RPS6,RPL27,RPS7,RPL7A,RPL27A,RPS8,RPL23A,RPL36,RPS16,UBA52,RPL12,RPL10A,RPL9,RPL37,RPS17,RPL28,RPL35,RPS3
Mitotic Spindle	0.0128795	0.240417	0.38073	0.832537	1.49189	125	8_NBB_AD52_HIP	1.8901	0.619035	NCK2,SSH2,MYO1E,FARP1,BIN1,ABR,CAPZB,CLIP2,PALLD,LMNB1,ABI1,BCR
Fatty Acid Metabolism	4.17235e-05	0.00233652	0.557332	-0.941487	-1.71302	56	8_NBB_AD53_HIP	4.37962	2.63143	HSP90AA1,ACSL1,HSPH1
Glycolysis	0.0206922	0.231752	0.352488	-0.821694	-1.53601	67	8_NBB_AD53_HIP	1.68419	0.634976	P4HA1,PGK1,ZNF292,DDIT4,IRS2,PKM,UGP2,SAP30,HSPA5,PYGL,FUT8,ERO1A,SLC16A3
Hypoxia	0.00629116	0.117435	0.407018	-0.878295	-1.63917	65	8_NBB_AD53_HIP	2.20127	0.930202	P4HA1,DTNA,BNIP3L,PGK1,ZNF292,DDIT4,PDK1,RBPJ,IRS2,NEDD4L,GAPDH,SERPINE1,GPI,HMOX1,UGP2,SAP30,HSPA5,ERO1A,LARGE1,GBE1,ZFP36,PFKP,ENO1
KEGG_RIBOSOME	0.0119535	0.167349	0.38073	-0.838834	-1.58314	73	8_NBB_AD53_HIP	1.9225	0.776377	RPS27,RPS15,RPS8,RPS6,RPS11,RPS20,RPL13A,RPL37A,RPL28,RPL36,RPL13,RPL37,RPL27,RPS24,RPL6,RPL35,RPL23A,RPL19,RPL32,RPS27A,RPS13,RPL11,RPL18,RPL31,RPS9,RPL34,RPL38,RPLP2,RPS12,RPL41,RPS16,RPL9,RPS28,RPL21,RPL14,RPL10A,RPL24,RPL15,RPS17,RPL30,FAU,RPS4X,RPS23,RPS25,RPL7,RPL8,RPS15A,RPL12,RPLP1
mTORC1 Signaling	0.00050174	0.0140487	0.477271	-0.86039	-1.67693	104	8_NBB_AD53_HIP	3.29952	1.85236	P4HA1,STIP1,PGK1,DDIT4,PDK1,SLC7A5,GAPDH,GPI,HSPD1,ELOVL5,HSPA5,CACYBP,ERO1A,SKAP2,GBE1,HSPA4,HPRT1,HSP90B1,ENO1,UBE2D3,GCLC,NAMPT,CALR
Fatty Acid Metabolism	0.00539381	0.151027	0.407018	0.907209	1.59745	52	2B_NBB_AD34_HIP	2.2681	0.820946	HSP90AA1,HSPH1,ACSL1,ELOVL5,HIBCH,AUH
Hypoxia	0.0134956	0.188939	0.38073	0.827079	1.51299	84	2B_NBB_AD34_HIP	1.86981	0.723679	P4HA1,DUSP1,CXCR4,SERPINE1,IRS2,BNIP3L,NEDD4L,PLAC8,KLHL24,ZNF292,CCNG2,TGFBI,SCARB1,FOS,SLC6A6,KDM3A,PGM1,FOXO3,PPP1R15A,NFIL3,DTNA,BTG1,NDRG1,MXI1,PGK1
KEGG_RIBOSOME	0.000510901	0.0286105	0.477271	-0.889074	-1.67011	58	2B_NBB_AD34_HIP	3.29166	1.54347	RPLP1,RPS27,RPS18,RPL37,RPS25,RPL10,RPL13A,RPS24,RPS3,RPS2,RPS8,RPS23,RPL31,RPL28,RPLP2,RPS12,RPL23,RPL30,RPS15,RPL35,RPL11,RPL38,RPS6,RPL3,RPS7,RPL12,RPS27A,RPSA,RPL4,RPL32,RPS11,RPL6,RPL14,RPS3A,RPL34,RPS19,RPL5,RPS20,RPS16,RPL8,RPS17,RPL15,RPL7A,RPL13,RPL36,RPL37A,RPL10A
KRAS Signaling Up	0.0115687	0.188939	0.38073	0.853296	1.53719	63	2B_NBB_AD34_HIP	1.93672	0.723679	SPON1,CXCR4,PRDM1,NRP1,CMKLR1,PPP1R15A
Apoptosis	0.0297905	0.217899	0.352488	0.869861	1.34443	78	2B_NBB_AD52_HIP	1.52592	0.661745	DPYD,BNIP3L,HSPB1,DNAJA1,IGF2R,CASP4,HMOX1,TXNIP,NEDD9
Fatty Acid Metabolism	0.00558053	0.0781275	0.407018	0.90981	1.39187	62	2B_NBB_AD52_HIP	2.25332	1.1072	ACSL1,HSP90AA1,HSPH1,LDHA,GLUL,HSD17B4,HSD17B11,PTPRG
Glycolysis	0.00517633	0.0781275	0.407018	0.890243	1.37726	85	2B_NBB_AD52_HIP	2.28598	1.1072	P4HA1,PGK1,DDIT4,ZNF292,LDHA,SAP30,PKM,VEGFA,ERO1A,ENO1,CXCR4,HK2,PFKP,FAM162A,MXI1,TGFBI,SLC16A3,PDK3,GYS1,UGP2,ALDOA,TPI1,PYGL,FKBP4,IRS2
Hypoxia	0.0023887	0.0668836	0.431708	0.895026	1.39424	100	2B_NBB_AD52_HIP	2.62184	1.17468	P4HA1,PGK1,SLC2A3,BNIP3L,DDIT4,DUSP1,GBE1,ZNF292,LDHA,RBPJ,SAP30,SERPINE1,PDK1,VEGFA,KDM3A,NEDD4L,GPI,ERO1A,SLC2A1,ENO1,CXCR4,PLIN2,HK2,PFKP,PLAUR,FAM162A,DTNA,MXI1,TGFBI,NFIL3,BHLHE40,PFKFB3,BTG1,PPP1R15A,FOSL2,CCNG2,HMOX1,FOS,SLC2A5,NDRG1,PDK3,GYS1,PFKL,UGP2,ALDOA
IL-2/STAT5 Signaling	0.0412371	0.217899	0.237794	0.845449	1.31369	91	2B_NBB_AD52_HIP	1.38471	0.661745	P4HA1,SPP1,SLC2A3,TNFRSF1B,PLIN2,HK2,GPR65,AHNAK,DENND5A,IL10RA,IGF2R,PLSCR1,NFIL3,BHLHE40,ALCAM
KEGG_PARKINSONS_DISEASE	0.0440098	0.217899	0.237794	0.88064	1.32225	48	2B_NBB_AD52_HIP	1.35645	0.661745	LRRK2,MT-ND3,MT-ND4,MT-ATP6,MT-CYB,MT-CO2,MT-CO3,MT-ND2,PPID,MT-ND4L
KRAS Signaling Up	0.0470588	0.217899	0.224966	0.85068	1.30435	69	2B_NBB_AD52_HIP	1.32736	0.661745	SPP1,SPON1,ERO1A,TNFRSF1B,CXCR4,GPNMB,PLAUR,IL10RA,PPP1R15A,MAFB,F13A1
Pperoxisome	0.0330073	0.217899	0.276501	0.891632	1.33876	48	2B_NBB_AD52_HIP	1.48139	0.661745	ACSL1,HSD17B4,ATXN1,HSD17B11,DHRS3,CADM1
Unfolded Protein Response	0.03298	0.217899	0.271289	0.867661	1.32713	65	2B_NBB_AD52_HIP	1.48175	0.661745	DDIT4,SLC7A5,VEGFA,ERO1A,BAG3,EDEM1,EIF2AK3,EIF4EBP1
heme Metabolism	0.0499432	0.217899	0.213928	0.832336	1.29902	95	2B_NBB_AD52_HIP	1.30152	0.661745	SLC25A37,BNIP3L,SLC2A1,SDCBP,TNS1,MXI1,CTSB,CLIC2,NARF,CCND3,ELL2,TFRC,GCLC,P4HA2
mTORC1 Signaling	0.00045512	0.0254867	0.498493	0.902052	1.41587	118	2B_NBB_AD52_HIP	3.34187	1.59369	P4HA1,PGK1,SLC2A3,DDIT4,GBE1,LDHA,SLC7A5,PDK1,NAMPT,GPI,ERO1A,SLC2A1,ENO1,CXCR4,HK2,BCAT1,SLA,NUPR1,DHFR,NFIL3,BHLHE40,CACYBP,HSPD1,PPP1R15A,STIP1,LTA4H,PFKL,ALDOA,TPI1,PGM1
p53 Pathway	0.014756	0.165267	0.38073	0.861695	1.34139	101	2B_NBB_AD52_HIP	1.83103	0.781813	ALOX15B,DDIT4,PVT1,FAM162A,NUPR1,BTG1,ZBTB16,PPP1R15A,HMOX1,RXRA,STEAP3,FOS,TXNIP,NDRG1,ST14,CCND3,RGS16,RALGDS,CASP1
Adipogenesis	0.0353369	0.141347	0.321776	0.838358	1.26495	95	2B_NBB_AD52_SPG	1.45177	0.849712	GBE1,PFKFB3,UBC,PLIN2,BCL6,PGM1,CCNG2,GPAT4,ALDH2,PDCD4,ALDOA,PFKL,RIOK3,AK2,RREB1,GPD2
Cholesterol Homeostasis	0.0499391	0.164505	0.222056	0.892048	1.27286	34	2B_NBB_AD52_SPG	1.30156	0.78382	PLSCR1,PDK3,PLAUR,NFIL3,PNRC1,ATF5,CTNNB1,ERRFI1,SCD,ATF3,CD9
DNA Repair	0.0322953	0.139118	0.271289	0.859261	1.26635	62	2B_NBB_AD52_SPG	1.49086	0.856616	SDCBP,RNMT,PDE4B,REV3L,ELL,HCLS1,GUK1,HPRT1
Fatty Acid Metabolism	0.00414604	0.0479522	0.407018	0.900645	1.32117	59	2B_NBB_AD52_SPG	2.38237	1.31919	ACSL1,HSP90AA1,GLUL,LDHA,HSPH1,ENO2,HSD17B4,GABARAPL1,ALDOA,HSDL2,GPD2,AUH
Glycolysis	0.00102597	0.0191514	0.45506	0.897867	1.34702	90	2B_NBB_AD52_SPG	2.98887	1.7178	PGK1,DDIT4,P4HA1,ERO1A,ZNF292,FAM162A,LDHA,MXI1,PFKP,ENO1,VEGFA,CXCR4,PKM,SAP30,ENO2,HK2,PPFIA4,SLC16A3,PDK3,AK4,P4HA2,ANKZF1,GYS1,SDC2,TPI1,UGP2,IRS2,ALDOA
Hypoxia	1.8806e-05	0.00105313	0.57561	0.90987	1.3786	108	2B_NBB_AD52_SPG	4.7257	2.97752	SLC2A3,FOSL2,BNIP3L,PGK1,DDIT4,GBE1,P4HA1,DUSP1,PFKFB3,ERO1A,RBPJ,ZNF292,FAM162A,NEDD4L,LDHA,PDK1,MXI1,PFKP,ENO1,VEGFA,CXCR4,PLIN2,KDM3A,GPI,SAP30,ENO2,PPP1R15A,HK2,PPFIA4,SLC2A1,PDK3,PGM1,ZFP36,AK4,ADM,CDKN1A,PLAUR,FOS,NFIL3,GAPDH,P4HA2,HMOX1,SLC2A5,PNRC1,CCNG2,ANKZF1,GYS1,NDRG1,BHLHE40,KLHL24,BTG1,WSB1,SDC2,TPI1,ERRFI1,UGP2,IRS2,PDGFB,ALDOA
Inflammatory Response	0.0178548	0.0999869	0.352488	0.862098	1.29318	86	2B_NBB_AD52_SPG	1.74825	1.00006	NAMPT,RNF144B,TNFRSF1B,HIF1A,RGS1,MXD1,PDE4B,CD55,ADM,CDKN1A,PLAUR,RIPK2,IL10RA,GPR183,NOD2,IL4R,C5AR1,FPR1,MSR1,RGS16,IL15
Interferon Gamma Response	0.0293632	0.137028	0.352488	0.835675	1.27204	114	2B_NBB_AD52_SPG	1.5322	0.86319	NAMPT,PLSCR1,HIF1A,PFKP,PDE4B,HLA-B,STAT3,CDKN1A,RIPK2,IL10RA,IL4R,PTPN1,PTPN2,BTG1,NLRC5,CIITA,SOCS3,B2M,FPR1,SOD2,HLA-A,EPSTI1,IL15,TNFAIP3,IFNAR2,CASP4,MT2A,IFITM3
KEGG_GLYCOLYSIS_GLUCONEOGENESIS	0.045925	0.160738	0.321776	0.922175	1.28367	25	2B_NBB_AD52_SPG	1.33795	0.793883	PGK1,LDHA,PFKP,ENO1,PKM,GPI,ENO2,HK2,PGM1,GAPDH,ALDH2,TPI1,ALDOA
KEGG_PARKINSONS_DISEASE	0.0273199	0.137028	0.352488	0.876645	1.28078	56	2B_NBB_AD52_SPG	1.56352	0.86319	LRRK2,UBA1,VDAC1,PPID
Myc Targets V1	0.012042	0.0963358	0.38073	0.84212	1.28439	120	2B_NBB_AD52_SPG	1.9193	1.01621	PGK1,LDHA,PTGES3,CUL1,HSP90AB1,DEK,HNRNPU,AP3S1,HSPD1,UBA2
Oxidative Phosphorylation	0.0164876	0.0999869	0.352488	0.850055	1.2835	101	2B_NBB_AD52_SPG	1.78284	1.00006	LDHA,GPI,HSPA9,TCIRG1,VDAC1,RHOT1,DECR1,CPT1A
TNF-alpha Signaling via NF-kB	0.00432866	0.0479522	0.407018	0.87079	1.31456	102	2B_NBB_AD52_SPG	2.36365	1.31919	NAMPT,SLC2A3,FOSL2,DUSP1,PFKFB3,VEGFA,REL,BCL6,MXD1,PDE4B,CEBPD,PPP1R15A,TNFAIP8,SGK1,DENND5A,ZFP36,MCL1,CDKN1A,PLAUR,FOS,RIPK2,IER5,NFIL3,GPR183,PNRC1,TNIP1,BHLHE40,MAP3K8,BTG1,PER1,NR4A3,SOCS3,LITAF,SAT1,IRS2,SOD2,ETS2,JUNB,NR4A2,ATF3,TGIF1,TNFAIP3
Unfolded Protein Response	0.0147028	0.0999869	0.38073	0.88122	1.302	66	2B_NBB_AD52_SPG	1.8326	1.00006	SLC7A5,DDIT4,ERO1A,VEGFA,EDEM1,BAG3
Wnt-beta Catenin Signaling	0.0450331	0.160738	0.245042	0.936907	1.28821	18	2B_NBB_AD52_SPG	1.34647	0.793883	PPARD,RBPJ,CUL1,CTNNB1
mTORC1 Signaling	7.51595e-05	0.00210447	0.538434	0.901801	1.37574	122	2B_NBB_AD52_SPG	4.12402	2.67686	NAMPT,SLC2A3,SLC7A5,PGK1,DDIT4,GBE1,P4HA1,ERO1A,LDHA,PDK1,ENO1,BCAT1,CXCR4,GPI,PPP1R15A,HK2,SLC2A1,PGM1,EDEM1,AK4,CDKN1A,TFRC,NFIL3,GGA2,GAPDH,BHLHE40,NUPR1,SLA,TPI1,STIP1,ALDOA
p53 Pathway	0.00513773	0.0479522	0.407018	0.87175	1.31592	100	2B_NBB_AD52_SPG	2.28923	1.31919	DDIT4,FAM162A,MXD1,ALOX15B,PPP1R15A,CDKN1A,FOS,IER5,HMOX1,NDRG1,VDR,NUPR1,BTG1,SAT1,RGS16,RALGDS,RXRA,BAIAP2,ATF3
Fatty Acid Metabolism	0.0124074	0.17305	0.38073	-0.792813	-1.5078	61	2B_NBB_AD53_HIP	1.90632	0.761827	HSP90AA1,HSPH1
IL-2/STAT5 Signaling	0.0149641	0.17305	0.38073	-0.760753	-1.5217	87	2B_NBB_AD53_HIP	1.82495	0.761827	SPP1,TIAM1,P4HA1,HK2,IRF8,MYO1E,IGF2R,CYFIP1,IKZF2,NFKBIZ
Inflammatory Response	0.0154509	0.17305	0.38073	0.794957	1.44446	78	2B_NBB_AD53_HIP	1.81105	0.761827	RGS1,CD55,CMKLR1,ATP2B1,HIF1A,ABCA1,GPR183,IL10RA,TLR3,MSR1,AXL,ACVR2A,RNF144B,PLAUR,CSF3R,TNFRSF1B,PSEN1
KRAS Signaling Dn	0.0107625	0.17305	0.38073	0.898056	1.49303	30	2B_NBB_AD53_HIP	1.96809	0.761827	SGK1,GRID2,TG,NR4A2,SLC29A3,SKIL
TNF-alpha Signaling via NF-kB	0.0103559	0.17305	0.38073	0.795826	1.46116	85	2B_NBB_AD53_HIP	1.98481	0.761827	SGK1,CEBPD,SAT1,FOS,NR4A3,DUSP1,ATP2B1,ABCA1,GPR183,PER1,TNFAIP2,MAP3K8,ID2,NR4A2,B4GALT1,PLAUR,PFKFB3,MCL1
